# Supplementary material for: Nomogram for predicting cancer specific survival in inflammatory breast carcinoma: a SEER population-based study
Source: PeerJ. 2019 Sep 16;7:e7659. doi: 10.7717/peerj.7659 (PMC6752187; doi:10.7717/peerj.7659)
Supplement: Data S1 [file peerj-07-7659-s004.xls]

## Sheet: Sheet1
Age recode with <1 year olds	Race recode (White, Black, Other)	Sex	Year of diagnosis	SEER registry	Louisiana 2005 - 1st vs 2nd half of year	County	State-county	In research data	CHSDA 2012	CHSDA Region	State	Site recode ICD-O-3/WHO 2008	Behavior recode for analysis	AYA site recode/WHO 2008	Lymphoma subtype recode/WHO 2008	ICCC site recode ICD-O-3/WHO 2008	CS Schema v0204+	CS Schema - AJCC 6th Edition	Primary Site - labeled	Primary Site	Histologic Type ICD-O-3	Behavior code ICD-O-3	Grade	Laterality	Diagnostic Confirmation	ICD-O-3 Hist/behav	ICD-O-3 Hist/behav, malignant	Histology recode - broad groupings	Histology recode - Brain groupings	ICCC site rec extended ICD-O-3/WHO 2008	Site recode B ICD-O-3/WHO 2008	Derived AJCC Stage Group, 7th ed (2010+)	Derived AJCC Stage Group, 6th ed (2004+)	Breast - Adjusted AJCC 6th Stage (1988+)	Derived AJCC - Flag (2004+)	AJCC stage 3rd edition (1988-2003)	SEER modified AJCC stage 3rd (1988-2003)	Lymphoma - Ann Arbor Stage (1983+)	Derived AJCC T, 7th ed (2010+)	Derived AJCC N, 7th ed (2010+)	Derived AJCC M, 7th ed (2010+)	Derived AJCC T, 6th ed (2004+)	Derived AJCC N, 6th ed (2004+)	Derived AJCC M, 6th ed (2004+)	T value - based on AJCC 3rd (1988-2003)	N value - based on AJCC 3rd (1988-2003)	M value - based on AJCC 3rd (1988-2003)	Breast - Adjusted AJCC 6th T (1988+)	Breast - Adjusted AJCC 6th N (1988+)
50-54 years	Black	Female	2010	San Francisco-Oakland SMSA - 1973+	Not applicable (1973-2004, 2005 not Louisiana, or 2006+)	13	CA: Contra Costa County (06013)	Yes	Not CHSDA	Pacific Coast	California	Breast	Malignant	8.4 Carcinoma of breast	Unclassified	XI(f) Other and unspecified carcinomas	Breast	Breast	C50.4-Upper-outer quadrant of breast	504	8530	Malignant	Poorly differentiated; Grade III	Right - origin of primary	Positive histology	8530/3: Inflammatory carcinoma	8530/3: Inflammatory carcinoma	8500-8549: ductal and lobular neoplasms	Not Brain	XI(f.6) Carcinomas of breast	Female Breast	IIIB	IIIB	IIIB	AJCC 6th ed derived from CS manual/coding instructions, v1.0	Blank(s)	Blank(s)	N/A	T4d	N2a	M0	T4d	N2a	M0	Blank(s)	Blank(s)	Blank(s)	T4d	N2
80-84 years	White	Female	2015	San Francisco-Oakland SMSA - 1973+	Not applicable (1973-2004, 2005 not Louisiana, or 2006+)	13	CA: Contra Costa County (06013)	Yes	Not CHSDA	Pacific Coast	California	Breast	Malignant	8.4 Carcinoma of breast	Unclassified	XI(f) Other and unspecified carcinomas	Breast	Breast	C50.9-Breast, NOS	509	8530	Malignant	Moderately differentiated; Grade II	Left - origin of primary	Positive histology	8530/3: Inflammatory carcinoma	8530/3: Inflammatory carcinoma	8500-8549: ductal and lobular neoplasms	Not Brain	XI(f.6) Carcinomas of breast	Female Breast	IV	IV	IIIC	AJCC 6th ed derived from CS manual/coding instructions, v1.0	Blank(s)	Blank(s)	N/A	T4d	N3c	M1	T4d	N3c	M1	Blank(s)	Blank(s)	Blank(s)	T4d	N3
55-59 years	White	Female	2011	San Francisco-Oakland SMSA - 1973+	Not applicable (1973-2004, 2005 not Louisiana, or 2006+)	41	CA: Marin County (06041)	Yes	Not CHSDA	Pacific Coast	California	Breast	Malignant	8.4 Carcinoma of breast	Unclassified	XI(f) Other and unspecified carcinomas	Breast	Breast	C50.8-Overlapping lesion of breast	508	8530	Malignant	Moderately differentiated; Grade II	Left - origin of primary	Positive histology	8530/3: Inflammatory carcinoma	8530/3: Inflammatory carcinoma	8500-8549: ductal and lobular neoplasms	Not Brain	XI(f.6) Carcinomas of breast	Female Breast	IIIB	IIIB	IIIB	AJCC 6th ed derived from CS manual/coding instructions, v1.0	Blank(s)	Blank(s)	N/A	T4d	N1	M0	T4d	N1	M0	Blank(s)	Blank(s)	Blank(s)	T4d	N1
60-64 years	White	Female	2014	San Francisco-Oakland SMSA - 1973+	Not applicable (1973-2004, 2005 not Louisiana, or 2006+)	75	CA: San Francisco County (06075)	Yes	Not CHSDA	Pacific Coast	California	Breast	Malignant	8.4 Carcinoma of breast	Unclassified	XI(f) Other and unspecified carcinomas	Breast	Breast	C50.1-Central portion of breast	501	8530	Malignant	Poorly differentiated; Grade III	Right - origin of primary	Positive histology	8530/3: Inflammatory carcinoma	8530/3: Inflammatory carcinoma	8500-8549: ductal and lobular neoplasms	Not Brain	XI(f.6) Carcinomas of breast	Female Breast	IIIB	IIIB	IIIB	AJCC 6th ed derived from CS manual/coding instructions, v1.0	Blank(s)	Blank(s)	N/A	T4d	N0	M0	T4d	N0	M0	Blank(s)	Blank(s)	Blank(s)	T4d	N0
55-59 years	White	Female	2012	San Francisco-Oakland SMSA - 1973+	Not applicable (1973-2004, 2005 not Louisiana, or 2006+)	13	CA: Contra Costa County (06013)	Yes	Not CHSDA	Pacific Coast	California	Breast	Malignant	8.4 Carcinoma of breast	Unclassified	XI(f) Other and unspecified carcinomas	Breast	Breast	C50.4-Upper-outer quadrant of breast	504	8530	Malignant	Poorly differentiated; Grade III	Right - origin of primary	Positive histology	8530/3: Inflammatory carcinoma	8530/3: Inflammatory carcinoma	8500-8549: ductal and lobular neoplasms	Not Brain	XI(f.6) Carcinomas of breast	Female Breast	IIIB	IIIB	IIIB	AJCC 6th ed derived from CS manual/coding instructions, v1.0	Blank(s)	Blank(s)	N/A	T4d	N0	M0	T4d	N0	M0	Blank(s)	Blank(s)	Blank(s)	T4d	N0
60-64 years	White	Female	2012	San Francisco-Oakland SMSA - 1973+	Not applicable (1973-2004, 2005 not Louisiana, or 2006+)	41	CA: Marin County (06041)	Yes	Not CHSDA	Pacific Coast	California	Breast	Malignant	8.4 Carcinoma of breast	Unclassified	XI(f) Other and unspecified carcinomas	Breast	Breast	C50.1-Central portion of breast	501	8530	Malignant	Moderately differentiated; Grade II	Left - origin of primary	Positive histology	8530/3: Inflammatory carcinoma	8530/3: Inflammatory carcinoma	8500-8549: ductal and lobular neoplasms	Not Brain	XI(f.6) Carcinomas of breast	Female Breast	IIIB	IIIB	IIIB	AJCC 6th ed derived from CS manual/coding instructions, v1.0	Blank(s)	Blank(s)	N/A	T4d	N1	M0	T4d	N1	M0	Blank(s)	Blank(s)	Blank(s)	T4d	N1
75-79 years	White	Female	2011	San Francisco-Oakland SMSA - 1973+	Not applicable (1973-2004, 2005 not Louisiana, or 2006+)	1	CA: Alameda County (06001)	Yes	Not CHSDA	Pacific Coast	California	Breast	Malignant	8.4 Carcinoma of breast	Unclassified	XI(f) Other and unspecified carcinomas	Breast	Breast	C50.4-Upper-outer quadrant of breast	504	8530	Malignant	Moderately differentiated; Grade II	Left - origin of primary	Positive histology	8530/3: Inflammatory carcinoma	8530/3: Inflammatory carcinoma	8500-8549: ductal and lobular neoplasms	Not Brain	XI(f.6) Carcinomas of breast	Female Breast	IIIB	IIIB	IIIB	AJCC 6th ed derived from CS manual/coding instructions, v1.0	Blank(s)	Blank(s)	N/A	T4d	N1	M0	T4d	N1	M0	Blank(s)	Blank(s)	Blank(s)	T4d	N1
55-59 years	Other (American Indian/AK Native, Asian/Pacific Islander)	Female	2012	San Francisco-Oakland SMSA - 1973+	Not applicable (1973-2004, 2005 not Louisiana, or 2006+)	81	CA: San Mateo County (06081)	Yes	Not CHSDA	Pacific Coast	California	Breast	Malignant	8.4 Carcinoma of breast	Unclassified	XI(f) Other and unspecified carcinomas	Breast	Breast	C50.9-Breast, NOS	509	8530	Malignant	Poorly differentiated; Grade III	Right - origin of primary	Positive histology	8530/3: Inflammatory carcinoma	8530/3: Inflammatory carcinoma	8500-8549: ductal and lobular neoplasms	Not Brain	XI(f.6) Carcinomas of breast	Female Breast	IV	IV	IV	AJCC 6th ed derived from CS manual/coding instructions, v1.0	Blank(s)	Blank(s)	N/A	T4d	N3NOS	M1	T4d	N3NOS	M1	Blank(s)	Blank(s)	Blank(s)	Any T, Mets	N3
85+ years	Other (American Indian/AK Native, Asian/Pacific Islander)	Female	2012	San Francisco-Oakland SMSA - 1973+	Not applicable (1973-2004, 2005 not Louisiana, or 2006+)	75	CA: San Francisco County (06075)	Yes	Not CHSDA	Pacific Coast	California	Breast	Malignant	8.4 Carcinoma of breast	Unclassified	XI(f) Other and unspecified carcinomas	Breast	Breast	C50.9-Breast, NOS	509	8530	Malignant	Poorly differentiated; Grade III	Left - origin of primary	Positive histology	8530/3: Inflammatory carcinoma	8530/3: Inflammatory carcinoma	8500-8549: ductal and lobular neoplasms	Not Brain	XI(f.6) Carcinomas of breast	Female Breast	IIIB	IIIB	IIIB	AJCC 6th ed derived from CS manual/coding instructions, v1.0	Blank(s)	Blank(s)	N/A	T4d	N1NOS	M0	T4d	N1NOS	M0	Blank(s)	Blank(s)	Blank(s)	T4d	N1
55-59 years	White	Female	2010	San Francisco-Oakland SMSA - 1973+	Not applicable (1973-2004, 2005 not Louisiana, or 2006+)	81	CA: San Mateo County (06081)	Yes	Not CHSDA	Pacific Coast	California	Breast	Malignant	8.4 Carcinoma of breast	Unclassified	XI(f) Other and unspecified carcinomas	Breast	Breast	C50.4-Upper-outer quadrant of breast	504	8530	Malignant	Poorly differentiated; Grade III	Right - origin of primary	Positive histology	8530/3: Inflammatory carcinoma	8530/3: Inflammatory carcinoma	8500-8549: ductal and lobular neoplasms	Not Brain	XI(f.6) Carcinomas of breast	Female Breast	IIIB	IIIB	IIIB	AJCC 6th ed derived from CS manual/coding instructions, v1.0	Blank(s)	Blank(s)	N/A	T4d	N1	M0	T4d	N1	M0	Blank(s)	Blank(s)	Blank(s)	T4d	N1
60-64 years	White	Female	2010	San Francisco-Oakland SMSA - 1973+	Not applicable (1973-2004, 2005 not Louisiana, or 2006+)	1	CA: Alameda County (06001)	Yes	Not CHSDA	Pacific Coast	California	Breast	Malignant	8.4 Carcinoma of breast	Unclassified	XI(f) Other and unspecified carcinomas	Breast	Breast	C50.9-Breast, NOS	509	8530	Malignant	Poorly differentiated; Grade III	Right - origin of primary	Positive histology	8530/3: Inflammatory carcinoma	8530/3: Inflammatory carcinoma	8500-8549: ductal and lobular neoplasms	Not Brain	XI(f.6) Carcinomas of breast	Female Breast	IIIC	IIIC	IIIC	AJCC 6th ed derived from CS manual/coding instructions, v1.0	Blank(s)	Blank(s)	N/A	T4d	N3a	M0	T4d	N3a	M0	Blank(s)	Blank(s)	Blank(s)	T4d	N3
40-44 years	White	Female	2010	San Francisco-Oakland SMSA - 1973+	Not applicable (1973-2004, 2005 not Louisiana, or 2006+)	13	CA: Contra Costa County (06013)	Yes	Not CHSDA	Pacific Coast	California	Breast	Malignant	8.4 Carcinoma of breast	Unclassified	XI(f) Other and unspecified carcinomas	Breast	Breast	C50.8-Overlapping lesion of breast	508	8530	Malignant	Poorly differentiated; Grade III	Right - origin of primary	Positive histology	8530/3: Inflammatory carcinoma	8530/3: Inflammatory carcinoma	8500-8549: ductal and lobular neoplasms	Not Brain	XI(f.6) Carcinomas of breast	Female Breast	IIIB	IIIB	IIIB	AJCC 6th ed derived from CS manual/coding instructions, v1.0	Blank(s)	Blank(s)	N/A	T4d	N2a	M0	T4d	N2a	M0	Blank(s)	Blank(s)	Blank(s)	T4d	N2
50-54 years	White	Female	2011	San Francisco-Oakland SMSA - 1973+	Not applicable (1973-2004, 2005 not Louisiana, or 2006+)	1	CA: Alameda County (06001)	Yes	Not CHSDA	Pacific Coast	California	Breast	Malignant	8.4 Carcinoma of breast	Unclassified	XI(f) Other and unspecified carcinomas	Breast	Breast	C50.9-Breast, NOS	509	8530	Malignant	Moderately differentiated; Grade II	Left - origin of primary	Positive histology	8530/3: Inflammatory carcinoma	8530/3: Inflammatory carcinoma	8500-8549: ductal and lobular neoplasms	Not Brain	XI(f.6) Carcinomas of breast	Female Breast	IIIB	IIIB	IIIB	AJCC 6th ed derived from CS manual/coding instructions, v1.0	Blank(s)	Blank(s)	N/A	T4d	N1	M0	T4d	N1	M0	Blank(s)	Blank(s)	Blank(s)	T4d	N1
50-54 years	White	Female	2012	San Francisco-Oakland SMSA - 1973+	Not applicable (1973-2004, 2005 not Louisiana, or 2006+)	1	CA: Alameda County (06001)	Yes	Not CHSDA	Pacific Coast	California	Breast	Malignant	8.4 Carcinoma of breast	Unclassified	XI(f) Other and unspecified carcinomas	Breast	Breast	C50.9-Breast, NOS	509	8530	Malignant	Poorly differentiated; Grade III	Right - origin of primary	Positive histology	8530/3: Inflammatory carcinoma	8530/3: Inflammatory carcinoma	8500-8549: ductal and lobular neoplasms	Not Brain	XI(f.6) Carcinomas of breast	Female Breast	IV	IV	IV	AJCC 6th ed derived from CS manual/coding instructions, v1.0	Blank(s)	Blank(s)	N/A	T4d	N3NOS	M1	T4d	N3NOS	M1	Blank(s)	Blank(s)	Blank(s)	Any T, Mets	N3
50-54 years	Other (American Indian/AK Native, Asian/Pacific Islander)	Female	2011	San Francisco-Oakland SMSA - 1973+	Not applicable (1973-2004, 2005 not Louisiana, or 2006+)	1	CA: Alameda County (06001)	Yes	Not CHSDA	Pacific Coast	California	Breast	Malignant	8.4 Carcinoma of breast	Unclassified	XI(f) Other and unspecified carcinomas	Breast	Breast	C50.9-Breast, NOS	509	8530	Malignant	Poorly differentiated; Grade III	Left - origin of primary	Positive histology	8530/3: Inflammatory carcinoma	8530/3: Inflammatory carcinoma	8500-8549: ductal and lobular neoplasms	Not Brain	XI(f.6) Carcinomas of breast	Female Breast	IV	IV	IV	AJCC 6th ed derived from CS manual/coding instructions, v1.0	Blank(s)	Blank(s)	N/A	T4d	N1	M1	T4d	N1	M1	Blank(s)	Blank(s)	Blank(s)	Any T, Mets	N1
75-79 years	White	Female	2011	San Francisco-Oakland SMSA - 1973+	Not applicable (1973-2004, 2005 not Louisiana, or 2006+)	41	CA: Marin County (06041)	Yes	Not CHSDA	Pacific Coast	California	Breast	Malignant	8.4 Carcinoma of breast	Unclassified	XI(f) Other and unspecified carcinomas	Breast	Breast	C50.8-Overlapping lesion of breast	508	8530	Malignant	Moderately differentiated; Grade II	Left - origin of primary	Positive histology	8530/3: Inflammatory carcinoma	8530/3: Inflammatory carcinoma	8500-8549: ductal and lobular neoplasms	Not Brain	XI(f.6) Carcinomas of breast	Female Breast	IIIB	IIIB	IIIB	AJCC 6th ed derived from CS manual/coding instructions, v1.0	Blank(s)	Blank(s)	N/A	T4d	N1a	M0	T4d	N1a	M0	Blank(s)	Blank(s)	Blank(s)	T4d	N1
50-54 years	White	Female	2011	San Francisco-Oakland SMSA - 1973+	Not applicable (1973-2004, 2005 not Louisiana, or 2006+)	13	CA: Contra Costa County (06013)	Yes	Not CHSDA	Pacific Coast	California	Breast	Malignant	8.4 Carcinoma of breast	Unclassified	XI(f) Other and unspecified carcinomas	Breast	Breast	C50.2-Upper-inner quadrant of breast	502	8530	Malignant	Poorly differentiated; Grade III	Right - origin of primary	Positive histology	8530/3: Inflammatory carcinoma	8530/3: Inflammatory carcinoma	8500-8549: ductal and lobular neoplasms	Not Brain	XI(f.6) Carcinomas of breast	Female Breast	IV	IV	IV	AJCC 6th ed derived from CS manual/coding instructions, v1.0	Blank(s)	Blank(s)	N/A	T4d	N1	M1	T4d	N1	M1	Blank(s)	Blank(s)	Blank(s)	Any T, Mets	N1
80-84 years	White	Female	2011	San Francisco-Oakland SMSA - 1973+	Not applicable (1973-2004, 2005 not Louisiana, or 2006+)	41	CA: Marin County (06041)	Yes	Not CHSDA	Pacific Coast	California	Breast	Malignant	8.4 Carcinoma of breast	Unclassified	XI(f) Other and unspecified carcinomas	Breast	Breast	C50.8-Overlapping lesion of breast	508	8530	Malignant	Undifferentiated; anaplastic; Grade IV	Left - origin of primary	Positive histology	8530/3: Inflammatory carcinoma	8530/3: Inflammatory carcinoma	8500-8549: ductal and lobular neoplasms	Not Brain	XI(f.6) Carcinomas of breast	Female Breast	IV	IV	IV	AJCC 6th ed derived from CS manual/coding instructions, v1.0	Blank(s)	Blank(s)	N/A	T4d	N2a	M1	T4d	N2a	M1	Blank(s)	Blank(s)	Blank(s)	Any T, Mets	N2
55-59 years	White	Female	2012	San Francisco-Oakland SMSA - 1973+	Not applicable (1973-2004, 2005 not Louisiana, or 2006+)	13	CA: Contra Costa County (06013)	Yes	Not CHSDA	Pacific Coast	California	Breast	Malignant	8.4 Carcinoma of breast	Unclassified	XI(f) Other and unspecified carcinomas	Breast	Breast	C50.9-Breast, NOS	509	8530	Malignant	Unknown	Left - origin of primary	Positive histology	8530/3: Inflammatory carcinoma	8530/3: Inflammatory carcinoma	8500-8549: ductal and lobular neoplasms	Not Brain	XI(f.6) Carcinomas of breast	Female Breast	IV	IV	IV	AJCC 6th ed derived from CS manual/coding instructions, v1.0	Blank(s)	Blank(s)	N/A	T4d	NX	M1	T4d	NX	M1	Blank(s)	Blank(s)	Blank(s)	Any T, Mets	NX Adjusted
70-74 years	White	Female	2012	San Francisco-Oakland SMSA - 1973+	Not applicable (1973-2004, 2005 not Louisiana, or 2006+)	1	CA: Alameda County (06001)	Yes	Not CHSDA	Pacific Coast	California	Breast	Malignant	8.4 Carcinoma of breast	Unclassified	XI(f) Other and unspecified carcinomas	Breast	Breast	C50.9-Breast, NOS	509	8530	Malignant	Unknown	Left - origin of primary	Positive histology	8530/3: Inflammatory carcinoma	8530/3: Inflammatory carcinoma	8500-8549: ductal and lobular neoplasms	Not Brain	XI(f.6) Carcinomas of breast	Female Breast	IV	IV	IV	AJCC 6th ed derived from CS manual/coding instructions, v1.0	Blank(s)	Blank(s)	N/A	T4d	NX	M1	T4d	NX	M1	Blank(s)	Blank(s)	Blank(s)	Any T, Mets	N3
35-39 years	White	Female	2012	San Francisco-Oakland SMSA - 1973+	Not applicable (1973-2004, 2005 not Louisiana, or 2006+)	1	CA: Alameda County (06001)	Yes	Not CHSDA	Pacific Coast	California	Breast	Malignant	8.4 Carcinoma of breast	Unclassified	XI(f) Other and unspecified carcinomas	Breast	Breast	C50.8-Overlapping lesion of breast	508	8530	Malignant	Poorly differentiated; Grade III	Right - origin of primary	Positive histology	8530/3: Inflammatory carcinoma	8530/3: Inflammatory carcinoma	8500-8549: ductal and lobular neoplasms	Not Brain	XI(f.6) Carcinomas of breast	Female Breast	IIIB	IIIB	IIIB	AJCC 6th ed derived from CS manual/coding instructions, v1.0	Blank(s)	Blank(s)	N/A	T4d	N0	M0	T4d	N0	M0	Blank(s)	Blank(s)	Blank(s)	T4d	N0
40-44 years	Other (American Indian/AK Native, Asian/Pacific Islander)	Female	2013	San Francisco-Oakland SMSA - 1973+	Not applicable (1973-2004, 2005 not Louisiana, or 2006+)	81	CA: San Mateo County (06081)	Yes	Not CHSDA	Pacific Coast	California	Breast	Malignant	8.4 Carcinoma of breast	Unclassified	XI(f) Other and unspecified carcinomas	Breast	Breast	C50.8-Overlapping lesion of breast	508	8530	Malignant	Moderately differentiated; Grade II	Left - origin of primary	Positive histology	8530/3: Inflammatory carcinoma	8530/3: Inflammatory carcinoma	8500-8549: ductal and lobular neoplasms	Not Brain	XI(f.6) Carcinomas of breast	Female Breast	IV	IV	IIIC	AJCC 6th ed derived from CS manual/coding instructions, v1.0	Blank(s)	Blank(s)	N/A	T4d	N1	M1	T4d	N1	M1	Blank(s)	Blank(s)	Blank(s)	T4d	N3
35-39 years	White	Female	2014	San Francisco-Oakland SMSA - 1973+	Not applicable (1973-2004, 2005 not Louisiana, or 2006+)	75	CA: San Francisco County (06075)	Yes	Not CHSDA	Pacific Coast	California	Breast	Malignant	8.4 Carcinoma of breast	Unclassified	XI(f) Other and unspecified carcinomas	Breast	Breast	C50.9-Breast, NOS	509	8530	Malignant	Poorly differentiated; Grade III	Right - origin of primary	Positive histology	8530/3: Inflammatory carcinoma	8530/3: Inflammatory carcinoma	8500-8549: ductal and lobular neoplasms	Not Brain	XI(f.6) Carcinomas of breast	Female Breast	IIIC	IIIC	IIIC	AJCC 6th ed derived from CS manual/coding instructions, v1.0	Blank(s)	Blank(s)	N/A	T4d	N3c	M0	T4d	N3c	M0	Blank(s)	Blank(s)	Blank(s)	T4d	N3
55-59 years	White	Female	2013	San Francisco-Oakland SMSA - 1973+	Not applicable (1973-2004, 2005 not Louisiana, or 2006+)	1	CA: Alameda County (06001)	Yes	Not CHSDA	Pacific Coast	California	Breast	Malignant	8.4 Carcinoma of breast	Unclassified	XI(f) Other and unspecified carcinomas	Breast	Breast	C50.4-Upper-outer quadrant of breast	504	8530	Malignant	Poorly differentiated; Grade III	Right - origin of primary	Positive histology	8530/3: Inflammatory carcinoma	8530/3: Inflammatory carcinoma	8500-8549: ductal and lobular neoplasms	Not Brain	XI(f.6) Carcinomas of breast	Female Breast	IIIB	IIIB	IIIB	AJCC 6th ed derived from CS manual/coding instructions, v1.0	Blank(s)	Blank(s)	N/A	T4d	N1a	M0	T4d	N1a	M0	Blank(s)	Blank(s)	Blank(s)	T4d	N1
20-24 years	White	Female	2014	San Francisco-Oakland SMSA - 1973+	Not applicable (1973-2004, 2005 not Louisiana, or 2006+)	13	CA: Contra Costa County (06013)	Yes	Not CHSDA	Pacific Coast	California	Breast	Malignant	8.4 Carcinoma of breast	Unclassified	XI(f) Other and unspecified carcinomas	Breast	Breast	C50.8-Overlapping lesion of breast	508	8530	Malignant	Poorly differentiated; Grade III	Right - origin of primary	Positive histology	8530/3: Inflammatory carcinoma	8530/3: Inflammatory carcinoma	8500-8549: ductal and lobular neoplasms	Not Brain	XI(f.6) Carcinomas of breast	Female Breast	IIIC	IIIC	IIIC	AJCC 6th ed derived from CS manual/coding instructions, v1.0	Blank(s)	Blank(s)	N/A	T4d	N3b	M0	T4d	N3b	M0	Blank(s)	Blank(s)	Blank(s)	T4d	N3
70-74 years	Other (American Indian/AK Native, Asian/Pacific Islander)	Female	2014	San Francisco-Oakland SMSA - 1973+	Not applicable (1973-2004, 2005 not Louisiana, or 2006+)	1	CA: Alameda County (06001)	Yes	Not CHSDA	Pacific Coast	California	Breast	Malignant	8.4 Carcinoma of breast	Unclassified	XI(f) Other and unspecified carcinomas	Breast	Breast	C50.3-Lower-inner quadrant of breast	503	8530	Malignant	Moderately differentiated; Grade II	Left - origin of primary	Positive histology	8530/3: Inflammatory carcinoma	8530/3: Inflammatory carcinoma	8500-8549: ductal and lobular neoplasms	Not Brain	XI(f.6) Carcinomas of breast	Female Breast	IV	IV	IV	AJCC 6th ed derived from CS manual/coding instructions, v1.0	Blank(s)	Blank(s)	N/A	T4d	N0	M1	T4d	N0	M1	Blank(s)	Blank(s)	Blank(s)	Any T, Mets	N0
40-44 years	Black	Female	2014	San Francisco-Oakland SMSA - 1973+	Not applicable (1973-2004, 2005 not Louisiana, or 2006+)	1	CA: Alameda County (06001)	Yes	Not CHSDA	Pacific Coast	California	Breast	Malignant	8.4 Carcinoma of breast	Unclassified	XI(f) Other and unspecified carcinomas	Breast	Breast	C50.4-Upper-outer quadrant of breast	504	8530	Malignant	Poorly differentiated; Grade III	Left - origin of primary	Positive histology	8530/3: Inflammatory carcinoma	8530/3: Inflammatory carcinoma	8500-8549: ductal and lobular neoplasms	Not Brain	XI(f.6) Carcinomas of breast	Female Breast	IIIB	IIIB	IIIB	AJCC 6th ed derived from CS manual/coding instructions, v1.0	Blank(s)	Blank(s)	N/A	T4d	N2a	M0	T4d	N2a	M0	Blank(s)	Blank(s)	Blank(s)	T4d	N2
60-64 years	White	Female	2014	San Francisco-Oakland SMSA - 1973+	Not applicable (1973-2004, 2005 not Louisiana, or 2006+)	1	CA: Alameda County (06001)	Yes	Not CHSDA	Pacific Coast	California	Breast	Malignant	8.4 Carcinoma of breast	Unclassified	XI(f) Other and unspecified carcinomas	Breast	Breast	C50.8-Overlapping lesion of breast	508	8530	Malignant	Poorly differentiated; Grade III	Left - origin of primary	Positive histology	8530/3: Inflammatory carcinoma	8530/3: Inflammatory carcinoma	8500-8549: ductal and lobular neoplasms	Not Brain	XI(f.6) Carcinomas of breast	Female Breast	IV	IV	IV	AJCC 6th ed derived from CS manual/coding instructions, v1.0	Blank(s)	Blank(s)	N/A	T4d	N3c	M1	T4d	N3c	M1	Blank(s)	Blank(s)	Blank(s)	Any T, Mets	N3
65-69 years	Other (American Indian/AK Native, Asian/Pacific Islander)	Female	2014	San Francisco-Oakland SMSA - 1973+	Not applicable (1973-2004, 2005 not Louisiana, or 2006+)	1	CA: Alameda County (06001)	Yes	Not CHSDA	Pacific Coast	California	Breast	Malignant	8.4 Carcinoma of breast	Unclassified	XI(f) Other and unspecified carcinomas	Breast	Breast	C50.9-Breast, NOS	509	8530	Malignant	Poorly differentiated; Grade III	Left - origin of primary	Positive histology	8530/3: Inflammatory carcinoma	8530/3: Inflammatory carcinoma	8500-8549: ductal and lobular neoplasms	Not Brain	XI(f.6) Carcinomas of breast	Female Breast	IIINOS	IIINOS	IIINOS	AJCC 6th ed derived from CS manual/coding instructions, v1.0	Blank(s)	Blank(s)	N/A	T4d	NX	M0	T4d	NX	M0	Blank(s)	Blank(s)	Blank(s)	T4d	NX Adjusted
35-39 years	White	Female	2015	San Francisco-Oakland SMSA - 1973+	Not applicable (1973-2004, 2005 not Louisiana, or 2006+)	1	CA: Alameda County (06001)	Yes	Not CHSDA	Pacific Coast	California	Breast	Malignant	8.4 Carcinoma of breast	Unclassified	XI(f) Other and unspecified carcinomas	Breast	Breast	C50.8-Overlapping lesion of breast	508	8530	Malignant	Unknown	Left - origin of primary	Positive histology	8530/3: Inflammatory carcinoma	8530/3: Inflammatory carcinoma	8500-8549: ductal and lobular neoplasms	Not Brain	XI(f.6) Carcinomas of breast	Female Breast	IIIB	IIIB	IIIB	AJCC 6th ed derived from CS manual/coding instructions, v1.0	Blank(s)	Blank(s)	N/A	T4d	N0	M0	T4d	N0	M0	Blank(s)	Blank(s)	Blank(s)	T4d	N0
85+ years	White	Female	2015	San Francisco-Oakland SMSA - 1973+	Not applicable (1973-2004, 2005 not Louisiana, or 2006+)	81	CA: San Mateo County (06081)	Yes	Not CHSDA	Pacific Coast	California	Breast	Malignant	8.4 Carcinoma of breast	Unclassified	XI(f) Other and unspecified carcinomas	Breast	Breast	C50.9-Breast, NOS	509	8530	Malignant	Poorly differentiated; Grade III	Left - origin of primary	Positive histology	8530/3: Inflammatory carcinoma	8530/3: Inflammatory carcinoma	8500-8549: ductal and lobular neoplasms	Not Brain	XI(f.6) Carcinomas of breast	Female Breast	IV	IV	IV	AJCC 6th ed derived from CS manual/coding instructions, v1.0	Blank(s)	Blank(s)	N/A	T4d	N1	M1	T4d	N1	M1	Blank(s)	Blank(s)	Blank(s)	Any T, Mets	N1
40-44 years	White	Female	2015	San Francisco-Oakland SMSA - 1973+	Not applicable (1973-2004, 2005 not Louisiana, or 2006+)	1	CA: Alameda County (06001)	Yes	Not CHSDA	Pacific Coast	California	Breast	Malignant	8.4 Carcinoma of breast	Unclassified	XI(f) Other and unspecified carcinomas	Breast	Breast	C50.8-Overlapping lesion of breast	508	8530	Malignant	Moderately differentiated; Grade II	Left - origin of primary	Positive histology	8530/3: Inflammatory carcinoma	8530/3: Inflammatory carcinoma	8500-8549: ductal and lobular neoplasms	Not Brain	XI(f.6) Carcinomas of breast	Female Breast	IIIB	IIIB	IIIB	AJCC 6th ed derived from CS manual/coding instructions, v1.0	Blank(s)	Blank(s)	N/A	T4d	N1	M0	T4d	N1	M0	Blank(s)	Blank(s)	Blank(s)	T4d	N1
80-84 years	Other (American Indian/AK Native, Asian/Pacific Islander)	Female	2015	San Francisco-Oakland SMSA - 1973+	Not applicable (1973-2004, 2005 not Louisiana, or 2006+)	81	CA: San Mateo County (06081)	Yes	Not CHSDA	Pacific Coast	California	Breast	Malignant	8.4 Carcinoma of breast	Unclassified	XI(f) Other and unspecified carcinomas	Breast	Breast	C50.8-Overlapping lesion of breast	508	8530	Malignant	Moderately differentiated; Grade II	Left - origin of primary	Positive histology	8530/3: Inflammatory carcinoma	8530/3: Inflammatory carcinoma	8500-8549: ductal and lobular neoplasms	Not Brain	XI(f.6) Carcinomas of breast	Female Breast	IIIB	IIIB	IIIB	AJCC 6th ed derived from CS manual/coding instructions, v1.0	Blank(s)	Blank(s)	N/A	T4d	N1	M0	T4d	N1	M0	Blank(s)	Blank(s)	Blank(s)	T4d	N1
65-69 years	White	Female	2013	Connecticut - 1973+	Not applicable (1973-2004, 2005 not Louisiana, or 2006+)	5	CT: Litchfield County (09005)	Yes	CHSDA	East	Connecticut	Breast	Malignant	8.4 Carcinoma of breast	Unclassified	XI(f) Other and unspecified carcinomas	Breast	Breast	C50.9-Breast, NOS	509	8530	Malignant	Unknown	Left - origin of primary	Positive histology	8530/3: Inflammatory carcinoma	8530/3: Inflammatory carcinoma	8500-8549: ductal and lobular neoplasms	Not Brain	XI(f.6) Carcinomas of breast	Female Breast	IIIB	IIIB	IIIB	AJCC 6th ed derived from CS manual/coding instructions, v1.0	Blank(s)	Blank(s)	N/A	T4d	N0	M0	T4d	N0	M0	Blank(s)	Blank(s)	Blank(s)	T4d	N0
70-74 years	White	Female	2013	Connecticut - 1973+	Not applicable (1973-2004, 2005 not Louisiana, or 2006+)	5	CT: Litchfield County (09005)	Yes	CHSDA	East	Connecticut	Breast	Malignant	8.4 Carcinoma of breast	Unclassified	XI(f) Other and unspecified carcinomas	Breast	Breast	C50.0-Nipple	500	8530	Malignant	Unknown	Left - origin of primary	Positive histology	8530/3: Inflammatory carcinoma	8530/3: Inflammatory carcinoma	8500-8549: ductal and lobular neoplasms	Not Brain	XI(f.6) Carcinomas of breast	Female Breast	IV	IV	IV	AJCC 6th ed derived from CS manual/coding instructions, v1.0	Blank(s)	Blank(s)	N/A	T4d	NX	M1	T4d	NX	M1	Blank(s)	Blank(s)	Blank(s)	Any T, Mets	NX Adjusted
45-49 years	White	Female	2010	Connecticut - 1973+	Not applicable (1973-2004, 2005 not Louisiana, or 2006+)	9	CT: New Haven County (09009)	Yes	CHSDA	East	Connecticut	Breast	Malignant	8.4 Carcinoma of breast	Unclassified	XI(f) Other and unspecified carcinomas	Breast	Breast	C50.9-Breast, NOS	509	8530	Malignant	Unknown	Left - origin of primary	Positive histology	8530/3: Inflammatory carcinoma	8530/3: Inflammatory carcinoma	8500-8549: ductal and lobular neoplasms	Not Brain	XI(f.6) Carcinomas of breast	Female Breast	IV	IV	IV	AJCC 6th ed derived from CS manual/coding instructions, v1.0	Blank(s)	Blank(s)	N/A	T4d	N1	M1	T4d	N1	M1	Blank(s)	Blank(s)	Blank(s)	Any T, Mets	N1
65-69 years	White	Female	2015	Connecticut - 1973+	Not applicable (1973-2004, 2005 not Louisiana, or 2006+)	15	CT: Windham County (09015)	Yes	CHSDA	East	Connecticut	Breast	Malignant	8.4 Carcinoma of breast	Unclassified	XI(f) Other and unspecified carcinomas	Breast	Breast	C50.9-Breast, NOS	509	8530	Malignant	Unknown	Left - origin of primary	Positive histology	8530/3: Inflammatory carcinoma	8530/3: Inflammatory carcinoma	8500-8549: ductal and lobular neoplasms	Not Brain	XI(f.6) Carcinomas of breast	Female Breast	IV	IV	IIIC	AJCC 6th ed derived from CS manual/coding instructions, v1.0	Blank(s)	Blank(s)	N/A	T4d	N0	M1	T4d	N0	M1	Blank(s)	Blank(s)	Blank(s)	T4d	N3
40-44 years	White	Female	2015	Connecticut - 1973+	Not applicable (1973-2004, 2005 not Louisiana, or 2006+)	9	CT: New Haven County (09009)	Yes	CHSDA	East	Connecticut	Breast	Malignant	8.4 Carcinoma of breast	Unclassified	XI(f) Other and unspecified carcinomas	Breast	Breast	C50.1-Central portion of breast	501	8530	Malignant	Moderately differentiated; Grade II	Left - origin of primary	Positive histology	8530/3: Inflammatory carcinoma	8530/3: Inflammatory carcinoma	8500-8549: ductal and lobular neoplasms	Not Brain	XI(f.6) Carcinomas of breast	Female Breast	IIIB	IIIB	IIIB	AJCC 6th ed derived from CS manual/coding instructions, v1.0	Blank(s)	Blank(s)	N/A	T4d	N0	M0	T4d	N0	M0	Blank(s)	Blank(s)	Blank(s)	T4d	N0
70-74 years	White	Female	2014	Connecticut - 1973+	Not applicable (1973-2004, 2005 not Louisiana, or 2006+)	3	CT: Hartford County (09003)	Yes	CHSDA	East	Connecticut	Breast	Malignant	8.4 Carcinoma of breast	Unclassified	XI(f) Other and unspecified carcinomas	Breast	Breast	C50.9-Breast, NOS	509	8530	Malignant	Unknown	Right - origin of primary	Positive histology	8530/3: Inflammatory carcinoma	8530/3: Inflammatory carcinoma	8500-8549: ductal and lobular neoplasms	Not Brain	XI(f.6) Carcinomas of breast	Female Breast	IIIC	IIIC	IIIC	AJCC 6th ed derived from CS manual/coding instructions, v1.0	Blank(s)	Blank(s)	N/A	T4d	N3c	M0	T4d	N3c	M0	Blank(s)	Blank(s)	Blank(s)	T4d	N3
60-64 years	White	Female	2013	Connecticut - 1973+	Not applicable (1973-2004, 2005 not Louisiana, or 2006+)	9	CT: New Haven County (09009)	Yes	CHSDA	East	Connecticut	Breast	Malignant	8.4 Carcinoma of breast	Unclassified	XI(f) Other and unspecified carcinomas	Breast	Breast	C50.8-Overlapping lesion of breast	508	8530	Malignant	Well differentiated; Grade I	Right - origin of primary	Positive histology	8530/3: Inflammatory carcinoma	8530/3: Inflammatory carcinoma	8500-8549: ductal and lobular neoplasms	Not Brain	XI(f.6) Carcinomas of breast	Female Breast	IIIB	IIIB	IIIB	AJCC 6th ed derived from CS manual/coding instructions, v1.0	Blank(s)	Blank(s)	N/A	T4d	N0(i-)	M0	T4d	N0(i-)	M0	Blank(s)	Blank(s)	Blank(s)	T4d	N0
70-74 years	White	Female	2011	Connecticut - 1973+	Not applicable (1973-2004, 2005 not Louisiana, or 2006+)	9	CT: New Haven County (09009)	Yes	CHSDA	East	Connecticut	Breast	Malignant	8.4 Carcinoma of breast	Unclassified	XI(f) Other and unspecified carcinomas	Breast	Breast	C50.8-Overlapping lesion of breast	508	8530	Malignant	Unknown	Left - origin of primary	Positive histology	8530/3: Inflammatory carcinoma	8530/3: Inflammatory carcinoma	8500-8549: ductal and lobular neoplasms	Not Brain	XI(f.6) Carcinomas of breast	Female Breast	IIIB	IIIB	IIIB	AJCC 6th ed derived from CS manual/coding instructions, v1.0	Blank(s)	Blank(s)	N/A	T4d	N1a	M0	T4d	N1a	M0	Blank(s)	Blank(s)	Blank(s)	T4d	N1
50-54 years	White	Female	2013	Connecticut - 1973+	Not applicable (1973-2004, 2005 not Louisiana, or 2006+)	9	CT: New Haven County (09009)	Yes	CHSDA	East	Connecticut	Breast	Malignant	8.4 Carcinoma of breast	Unclassified	XI(f) Other and unspecified carcinomas	Breast	Breast	C50.9-Breast, NOS	509	8530	Malignant	Unknown	Left - origin of primary	Positive histology	8530/3: Inflammatory carcinoma	8530/3: Inflammatory carcinoma	8500-8549: ductal and lobular neoplasms	Not Brain	XI(f.6) Carcinomas of breast	Female Breast	IIIB	IIIB	IIIB	AJCC 6th ed derived from CS manual/coding instructions, v1.0	Blank(s)	Blank(s)	N/A	T4d	N0	M0	T4d	N0	M0	Blank(s)	Blank(s)	Blank(s)	T4d	N0
50-54 years	White	Female	2010	Connecticut - 1973+	Not applicable (1973-2004, 2005 not Louisiana, or 2006+)	3	CT: Hartford County (09003)	Yes	CHSDA	East	Connecticut	Breast	Malignant	8.4 Carcinoma of breast	Unclassified	XI(f) Other and unspecified carcinomas	Breast	Breast	C50.9-Breast, NOS	509	8530	Malignant	Unknown	Right - origin of primary	Positive histology	8530/3: Inflammatory carcinoma	8530/3: Inflammatory carcinoma	8500-8549: ductal and lobular neoplasms	Not Brain	XI(f.6) Carcinomas of breast	Female Breast	IIIB	IIIB	IIIB	AJCC 6th ed derived from CS manual/coding instructions, v1.0	Blank(s)	Blank(s)	N/A	T4d	N0(i+)	M0	T4d	N0(i+)	M0	Blank(s)	Blank(s)	Blank(s)	T4d	N0
55-59 years	White	Female	2011	Connecticut - 1973+	Not applicable (1973-2004, 2005 not Louisiana, or 2006+)	3	CT: Hartford County (09003)	Yes	CHSDA	East	Connecticut	Breast	Malignant	8.4 Carcinoma of breast	Unclassified	XI(f) Other and unspecified carcinomas	Breast	Breast	C50.4-Upper-outer quadrant of breast	504	8530	Malignant	Unknown	Left - origin of primary	Positive histology	8530/3: Inflammatory carcinoma	8530/3: Inflammatory carcinoma	8500-8549: ductal and lobular neoplasms	Not Brain	XI(f.6) Carcinomas of breast	Female Breast	IIIB	UNK Stage	UNK Stage	AJCC 6th ed derived from CS manual/coding instructions, v1.0	Blank(s)	Blank(s)	N/A	T4d	N0	M0	T4d	N0	MX	Blank(s)	Blank(s)	Blank(s)	TX Adjusted	NX Adjusted
85+ years	White	Female	2010	Connecticut - 1973+	Not applicable (1973-2004, 2005 not Louisiana, or 2006+)	9	CT: New Haven County (09009)	Yes	CHSDA	East	Connecticut	Breast	Malignant	8.4 Carcinoma of breast	Unclassified	XI(f) Other and unspecified carcinomas	Breast	Breast	C50.9-Breast, NOS	509	8530	Malignant	Poorly differentiated; Grade III	Right - origin of primary	Positive histology	8530/3: Inflammatory carcinoma	8530/3: Inflammatory carcinoma	8500-8549: ductal and lobular neoplasms	Not Brain	XI(f.6) Carcinomas of breast	Female Breast	IIIB	IIIB	IIIB	AJCC 6th ed derived from CS manual/coding instructions, v1.0	Blank(s)	Blank(s)	N/A	T4d	N1a	M0	T4d	N1a	M0	Blank(s)	Blank(s)	Blank(s)	T4d	N1
30-34 years	Other (American Indian/AK Native, Asian/Pacific Islander)	Female	2010	Connecticut - 1973+	Not applicable (1973-2004, 2005 not Louisiana, or 2006+)	9	CT: New Haven County (09009)	Yes	CHSDA	East	Connecticut	Breast	Malignant	8.4 Carcinoma of breast	Unclassified	XI(f) Other and unspecified carcinomas	Breast	Breast	C50.9-Breast, NOS	509	8530	Malignant	Poorly differentiated; Grade III	Right - origin of primary	Positive histology	8530/3: Inflammatory carcinoma	8530/3: Inflammatory carcinoma	8500-8549: ductal and lobular neoplasms	Not Brain	XI(f.6) Carcinomas of breast	Female Breast	IIIB	IIIB	IIIB	AJCC 6th ed derived from CS manual/coding instructions, v1.0	Blank(s)	Blank(s)	N/A	T4d	N2NOS	M0	T4d	N2NOS	M0	Blank(s)	Blank(s)	Blank(s)	T4d	N2
30-34 years	White	Female	2010	Connecticut - 1973+	Not applicable (1973-2004, 2005 not Louisiana, or 2006+)	3	CT: Hartford County (09003)	Yes	CHSDA	East	Connecticut	Breast	Malignant	8.4 Carcinoma of breast	Unclassified	XI(f) Other and unspecified carcinomas	Breast	Breast	C50.4-Upper-outer quadrant of breast	504	8530	Malignant	Moderately differentiated; Grade II	Left - origin of primary	Positive histology	8530/3: Inflammatory carcinoma	8530/3: Inflammatory carcinoma	8500-8549: ductal and lobular neoplasms	Not Brain	XI(f.6) Carcinomas of breast	Female Breast	IIIB	IIIB	IIIB	AJCC 6th ed derived from CS manual/coding instructions, v1.0	Blank(s)	Blank(s)	N/A	T4d	N1	M0	T4d	N1	M0	Blank(s)	Blank(s)	Blank(s)	T4d	N1
50-54 years	White	Female	2010	Connecticut - 1973+	Not applicable (1973-2004, 2005 not Louisiana, or 2006+)	1	CT: Fairfield County (09001)	Yes	CHSDA	East	Connecticut	Breast	Malignant	8.4 Carcinoma of breast	Unclassified	XI(f) Other and unspecified carcinomas	Breast	Breast	C50.4-Upper-outer quadrant of breast	504	8530	Malignant	Poorly differentiated; Grade III	Right - origin of primary	Positive histology	8530/3: Inflammatory carcinoma	8530/3: Inflammatory carcinoma	8500-8549: ductal and lobular neoplasms	Not Brain	XI(f.6) Carcinomas of breast	Female Breast	IIIB	IIIB	IIIB	AJCC 6th ed derived from CS manual/coding instructions, v1.0	Blank(s)	Blank(s)	N/A	T4d	N1	M0	T4d	N1	M0	Blank(s)	Blank(s)	Blank(s)	T4d	N1
60-64 years	White	Female	2010	Connecticut - 1973+	Not applicable (1973-2004, 2005 not Louisiana, or 2006+)	1	CT: Fairfield County (09001)	Yes	CHSDA	East	Connecticut	Breast	Malignant	8.4 Carcinoma of breast	Unclassified	XI(f) Other and unspecified carcinomas	Breast	Breast	C50.9-Breast, NOS	509	8530	Malignant	Unknown	Right - origin of primary	Positive histology	8530/3: Inflammatory carcinoma	8530/3: Inflammatory carcinoma	8500-8549: ductal and lobular neoplasms	Not Brain	XI(f.6) Carcinomas of breast	Female Breast	IV	IV	IV	AJCC 6th ed derived from CS manual/coding instructions, v1.0	Blank(s)	Blank(s)	N/A	T4d	N1	M1	T4d	N1	M1	Blank(s)	Blank(s)	Blank(s)	Any T, Mets	N1
75-79 years	Black	Female	2010	Connecticut - 1973+	Not applicable (1973-2004, 2005 not Louisiana, or 2006+)	1	CT: Fairfield County (09001)	Yes	CHSDA	East	Connecticut	Breast	Malignant	8.4 Carcinoma of breast	Unclassified	XI(f) Other and unspecified carcinomas	Breast	Breast	C50.1-Central portion of breast	501	8530	Malignant	Moderately differentiated; Grade II	Left - origin of primary	Positive histology	8530/3: Inflammatory carcinoma	8530/3: Inflammatory carcinoma	8500-8549: ductal and lobular neoplasms	Not Brain	XI(f.6) Carcinomas of breast	Female Breast	IIIB	IIIB	IIIB	AJCC 6th ed derived from CS manual/coding instructions, v1.0	Blank(s)	Blank(s)	N/A	T4d	N1	M0	T4d	N1	M0	Blank(s)	Blank(s)	Blank(s)	T4d	N1
45-49 years	White	Female	2010	Connecticut - 1973+	Not applicable (1973-2004, 2005 not Louisiana, or 2006+)	13	CT: Tolland County (09013)	Yes	CHSDA	East	Connecticut	Breast	Malignant	8.4 Carcinoma of breast	Unclassified	XI(f) Other and unspecified carcinomas	Breast	Breast	C50.1-Central portion of breast	501	8530	Malignant	Poorly differentiated; Grade III	Right - origin of primary	Positive histology	8530/3: Inflammatory carcinoma	8530/3: Inflammatory carcinoma	8500-8549: ductal and lobular neoplasms	Not Brain	XI(f.6) Carcinomas of breast	Female Breast	IV	IV	IV	AJCC 6th ed derived from CS manual/coding instructions, v1.0	Blank(s)	Blank(s)	N/A	T4d	N1	M1	T4d	N1	M1	Blank(s)	Blank(s)	Blank(s)	Any T, Mets	N3
35-39 years	White	Female	2010	Connecticut - 1973+	Not applicable (1973-2004, 2005 not Louisiana, or 2006+)	15	CT: Windham County (09015)	Yes	CHSDA	East	Connecticut	Breast	Malignant	8.4 Carcinoma of breast	Unclassified	XI(f) Other and unspecified carcinomas	Breast	Breast	C50.8-Overlapping lesion of breast	508	8530	Malignant	Poorly differentiated; Grade III	Right - origin of primary	Positive histology	8530/3: Inflammatory carcinoma	8530/3: Inflammatory carcinoma	8500-8549: ductal and lobular neoplasms	Not Brain	XI(f.6) Carcinomas of breast	Female Breast	IV	IV	IV	AJCC 6th ed derived from CS manual/coding instructions, v1.0	Blank(s)	Blank(s)	N/A	T4d	N1	M1	T4d	N1	M1	Blank(s)	Blank(s)	Blank(s)	Any T, Mets	N1
35-39 years	White	Female	2011	Connecticut - 1973+	Not applicable (1973-2004, 2005 not Louisiana, or 2006+)	9	CT: New Haven County (09009)	Yes	CHSDA	East	Connecticut	Breast	Malignant	8.4 Carcinoma of breast	Unclassified	XI(f) Other and unspecified carcinomas	Breast	Breast	C50.9-Breast, NOS	509	8530	Malignant	Poorly differentiated; Grade III	Left - origin of primary	Positive histology	8530/3: Inflammatory carcinoma	8530/3: Inflammatory carcinoma	8500-8549: ductal and lobular neoplasms	Not Brain	XI(f.6) Carcinomas of breast	Female Breast	IV	IV	IV	AJCC 6th ed derived from CS manual/coding instructions, v1.0	Blank(s)	Blank(s)	N/A	T4d	N1	M1	T4d	N1	M1	Blank(s)	Blank(s)	Blank(s)	Any T, Mets	N1
65-69 years	Black	Female	2011	Connecticut - 1973+	Not applicable (1973-2004, 2005 not Louisiana, or 2006+)	9	CT: New Haven County (09009)	Yes	CHSDA	East	Connecticut	Breast	Malignant	8.4 Carcinoma of breast	Unclassified	XI(f) Other and unspecified carcinomas	Breast	Breast	C50.8-Overlapping lesion of breast	508	8530	Malignant	Unknown	Left - origin of primary	Positive histology	8530/3: Inflammatory carcinoma	8530/3: Inflammatory carcinoma	8500-8549: ductal and lobular neoplasms	Not Brain	XI(f.6) Carcinomas of breast	Female Breast	IV	IV	IV	AJCC 6th ed derived from CS manual/coding instructions, v1.0	Blank(s)	Blank(s)	N/A	T4d	N0	M1	T4d	N0	M1	Blank(s)	Blank(s)	Blank(s)	Any T, Mets	N0
55-59 years	White	Female	2011	Connecticut - 1973+	Not applicable (1973-2004, 2005 not Louisiana, or 2006+)	11	CT: New London County (09011)	Yes	CHSDA	East	Connecticut	Breast	Malignant	8.4 Carcinoma of breast	Unclassified	XI(f) Other and unspecified carcinomas	Breast	Breast	C50.8-Overlapping lesion of breast	508	8530	Malignant	Poorly differentiated; Grade III	Left - origin of primary	Positive histology	8530/3: Inflammatory carcinoma	8530/3: Inflammatory carcinoma	8500-8549: ductal and lobular neoplasms	Not Brain	XI(f.6) Carcinomas of breast	Female Breast	IIIB	IIIB	IIIB	AJCC 6th ed derived from CS manual/coding instructions, v1.0	Blank(s)	Blank(s)	N/A	T4d	N1a	M0	T4d	N1a	M0	Blank(s)	Blank(s)	Blank(s)	T4d	N1
75-79 years	White	Female	2011	Connecticut - 1973+	Not applicable (1973-2004, 2005 not Louisiana, or 2006+)	3	CT: Hartford County (09003)	Yes	CHSDA	East	Connecticut	Breast	Malignant	8.4 Carcinoma of breast	Unclassified	XI(f) Other and unspecified carcinomas	Breast	Breast	C50.9-Breast, NOS	509	8530	Malignant	Moderately differentiated; Grade II	Left - origin of primary	Positive histology	8530/3: Inflammatory carcinoma	8530/3: Inflammatory carcinoma	8500-8549: ductal and lobular neoplasms	Not Brain	XI(f.6) Carcinomas of breast	Female Breast	IIIB	IIIB	IIIB	AJCC 6th ed derived from CS manual/coding instructions, v1.0	Blank(s)	Blank(s)	N/A	T4d	N1	M0	T4d	N1	M0	Blank(s)	Blank(s)	Blank(s)	T4d	N1
65-69 years	White	Female	2011	Connecticut - 1973+	Not applicable (1973-2004, 2005 not Louisiana, or 2006+)	3	CT: Hartford County (09003)	Yes	CHSDA	East	Connecticut	Breast	Malignant	8.4 Carcinoma of breast	Unclassified	XI(f) Other and unspecified carcinomas	Breast	Breast	C50.8-Overlapping lesion of breast	508	8530	Malignant	Poorly differentiated; Grade III	Left - origin of primary	Positive histology	8530/3: Inflammatory carcinoma	8530/3: Inflammatory carcinoma	8500-8549: ductal and lobular neoplasms	Not Brain	XI(f.6) Carcinomas of breast	Female Breast	IIIB	IIIB	IIIB	AJCC 6th ed derived from CS manual/coding instructions, v1.0	Blank(s)	Blank(s)	N/A	T4d	N1	M0	T4d	N1	M0	Blank(s)	Blank(s)	Blank(s)	T4d	N1
40-44 years	White	Female	2011	Connecticut - 1973+	Not applicable (1973-2004, 2005 not Louisiana, or 2006+)	3	CT: Hartford County (09003)	Yes	CHSDA	East	Connecticut	Breast	Malignant	8.4 Carcinoma of breast	Unclassified	XI(f) Other and unspecified carcinomas	Breast	Breast	C50.9-Breast, NOS	509	8530	Malignant	Moderately differentiated; Grade II	Right - origin of primary	Positive histology	8530/3: Inflammatory carcinoma	8530/3: Inflammatory carcinoma	8500-8549: ductal and lobular neoplasms	Not Brain	XI(f.6) Carcinomas of breast	Female Breast	IV	IV	IV	AJCC 6th ed derived from CS manual/coding instructions, v1.0	Blank(s)	Blank(s)	N/A	T4d	N1	M1	T4d	N1	M1	Blank(s)	Blank(s)	Blank(s)	Any T, Mets	N3
45-49 years	Black	Female	2011	Connecticut - 1973+	Not applicable (1973-2004, 2005 not Louisiana, or 2006+)	9	CT: New Haven County (09009)	Yes	CHSDA	East	Connecticut	Breast	Malignant	8.4 Carcinoma of breast	Unclassified	XI(f) Other and unspecified carcinomas	Breast	Breast	C50.5-Lower-outer quadrant of breast	505	8530	Malignant	Unknown	Left - origin of primary	Positive histology	8530/3: Inflammatory carcinoma	8530/3: Inflammatory carcinoma	8500-8549: ductal and lobular neoplasms	Not Brain	XI(f.6) Carcinomas of breast	Female Breast	IIIB	IIIB	IIIB	AJCC 6th ed derived from CS manual/coding instructions, v1.0	Blank(s)	Blank(s)	N/A	T4d	N1a	M0	T4d	N1a	M0	Blank(s)	Blank(s)	Blank(s)	T4d	N1
55-59 years	White	Female	2011	Connecticut - 1973+	Not applicable (1973-2004, 2005 not Louisiana, or 2006+)	9	CT: New Haven County (09009)	Yes	CHSDA	East	Connecticut	Breast	Malignant	8.4 Carcinoma of breast	Unclassified	XI(f) Other and unspecified carcinomas	Breast	Breast	C50.8-Overlapping lesion of breast	508	8530	Malignant	Unknown	Right - origin of primary	Positive histology	8530/3: Inflammatory carcinoma	8530/3: Inflammatory carcinoma	8500-8549: ductal and lobular neoplasms	Not Brain	XI(f.6) Carcinomas of breast	Female Breast	IIIB	IIIB	IIIB	AJCC 6th ed derived from CS manual/coding instructions, v1.0	Blank(s)	Blank(s)	N/A	T4d	N1	M0	T4d	N1	M0	Blank(s)	Blank(s)	Blank(s)	T4d	N1
40-44 years	Black	Female	2011	Connecticut - 1973+	Not applicable (1973-2004, 2005 not Louisiana, or 2006+)	11	CT: New London County (09011)	Yes	CHSDA	East	Connecticut	Breast	Malignant	8.4 Carcinoma of breast	Unclassified	XI(f) Other and unspecified carcinomas	Breast	Breast	C50.8-Overlapping lesion of breast	508	8530	Malignant	Poorly differentiated; Grade III	Left - origin of primary	Positive histology	8530/3: Inflammatory carcinoma	8530/3: Inflammatory carcinoma	8500-8549: ductal and lobular neoplasms	Not Brain	XI(f.6) Carcinomas of breast	Female Breast	IIIB	IIIB	IIIB	AJCC 6th ed derived from CS manual/coding instructions, v1.0	Blank(s)	Blank(s)	N/A	T4d	N1a	M0	T4d	N1a	M0	Blank(s)	Blank(s)	Blank(s)	T4d	N1
65-69 years	White	Female	2012	Connecticut - 1973+	Not applicable (1973-2004, 2005 not Louisiana, or 2006+)	11	CT: New London County (09011)	Yes	CHSDA	East	Connecticut	Breast	Malignant	8.4 Carcinoma of breast	Unclassified	XI(f) Other and unspecified carcinomas	Breast	Breast	C50.4-Upper-outer quadrant of breast	504	8530	Malignant	Moderately differentiated; Grade II	Right - origin of primary	Positive histology	8530/3: Inflammatory carcinoma	8530/3: Inflammatory carcinoma	8500-8549: ductal and lobular neoplasms	Not Brain	XI(f.6) Carcinomas of breast	Female Breast	IIIB	IIIB	IIIB	AJCC 6th ed derived from CS manual/coding instructions, v1.0	Blank(s)	Blank(s)	N/A	T4d	N0(i+)	M0	T4d	N0(i+)	M0	Blank(s)	Blank(s)	Blank(s)	T4d	N0
45-49 years	White	Female	2012	Connecticut - 1973+	Not applicable (1973-2004, 2005 not Louisiana, or 2006+)	11	CT: New London County (09011)	Yes	CHSDA	East	Connecticut	Breast	Malignant	8.4 Carcinoma of breast	Unclassified	XI(f) Other and unspecified carcinomas	Breast	Breast	C50.1-Central portion of breast	501	8530	Malignant	Poorly differentiated; Grade III	Right - origin of primary	Positive histology	8530/3: Inflammatory carcinoma	8530/3: Inflammatory carcinoma	8500-8549: ductal and lobular neoplasms	Not Brain	XI(f.6) Carcinomas of breast	Female Breast	IIIB	IIIB	IIIB	AJCC 6th ed derived from CS manual/coding instructions, v1.0	Blank(s)	Blank(s)	N/A	T4d	N1	M0	T4d	N1	M0	Blank(s)	Blank(s)	Blank(s)	T4d	N1
60-64 years	White	Female	2012	Connecticut - 1973+	Not applicable (1973-2004, 2005 not Louisiana, or 2006+)	1	CT: Fairfield County (09001)	Yes	CHSDA	East	Connecticut	Breast	Malignant	8.4 Carcinoma of breast	Unclassified	XI(f) Other and unspecified carcinomas	Breast	Breast	C50.9-Breast, NOS	509	8530	Malignant	Poorly differentiated; Grade III	Left - origin of primary	Positive histology	8530/3: Inflammatory carcinoma	8530/3: Inflammatory carcinoma	8500-8549: ductal and lobular neoplasms	Not Brain	XI(f.6) Carcinomas of breast	Female Breast	IV	IV	IIIC	AJCC 6th ed derived from CS manual/coding instructions, v1.0	Blank(s)	Blank(s)	N/A	T4d	N3c	M1	T4d	N3c	M1	Blank(s)	Blank(s)	Blank(s)	T4d	N3
30-34 years	White	Female	2012	Connecticut - 1973+	Not applicable (1973-2004, 2005 not Louisiana, or 2006+)	1	CT: Fairfield County (09001)	Yes	CHSDA	East	Connecticut	Breast	Malignant	8.4 Carcinoma of breast	Unclassified	XI(f) Other and unspecified carcinomas	Breast	Breast	C50.8-Overlapping lesion of breast	508	8530	Malignant	Unknown	Left - origin of primary	Positive histology	8530/3: Inflammatory carcinoma	8530/3: Inflammatory carcinoma	8500-8549: ductal and lobular neoplasms	Not Brain	XI(f.6) Carcinomas of breast	Female Breast	IIIB	IIIB	IIIB	AJCC 6th ed derived from CS manual/coding instructions, v1.0	Blank(s)	Blank(s)	N/A	T4d	N1a	M0	T4d	N1a	M0	Blank(s)	Blank(s)	Blank(s)	T4d	N1
55-59 years	White	Female	2012	Connecticut - 1973+	Not applicable (1973-2004, 2005 not Louisiana, or 2006+)	9	CT: New Haven County (09009)	Yes	CHSDA	East	Connecticut	Breast	Malignant	8.4 Carcinoma of breast	Unclassified	XI(f) Other and unspecified carcinomas	Breast	Breast	C50.9-Breast, NOS	509	8530	Malignant	Poorly differentiated; Grade III	Left - origin of primary	Positive histology	8530/3: Inflammatory carcinoma	8530/3: Inflammatory carcinoma	8500-8549: ductal and lobular neoplasms	Not Brain	XI(f.6) Carcinomas of breast	Female Breast	IIIB	IIIB	IIIB	AJCC 6th ed derived from CS manual/coding instructions, v1.0	Blank(s)	Blank(s)	N/A	T4d	N1	M0	T4d	N1	M0	Blank(s)	Blank(s)	Blank(s)	T4d	N1
45-49 years	White	Female	2012	Connecticut - 1973+	Not applicable (1973-2004, 2005 not Louisiana, or 2006+)	9	CT: New Haven County (09009)	Yes	CHSDA	East	Connecticut	Breast	Malignant	8.4 Carcinoma of breast	Unclassified	XI(f) Other and unspecified carcinomas	Breast	Breast	C50.5-Lower-outer quadrant of breast	505	8530	Malignant	Unknown	Left - origin of primary	Positive histology	8530/3: Inflammatory carcinoma	8530/3: Inflammatory carcinoma	8500-8549: ductal and lobular neoplasms	Not Brain	XI(f.6) Carcinomas of breast	Female Breast	IIIB	IIIB	IIIB	AJCC 6th ed derived from CS manual/coding instructions, v1.0	Blank(s)	Blank(s)	N/A	T4d	N1	M0	T4d	N1	M0	Blank(s)	Blank(s)	Blank(s)	T4d	N1
55-59 years	White	Female	2012	Connecticut - 1973+	Not applicable (1973-2004, 2005 not Louisiana, or 2006+)	15	CT: Windham County (09015)	Yes	CHSDA	East	Connecticut	Breast	Malignant	8.4 Carcinoma of breast	Unclassified	XI(f) Other and unspecified carcinomas	Breast	Breast	C50.2-Upper-inner quadrant of breast	502	8530	Malignant	Moderately differentiated; Grade II	Right - origin of primary	Positive histology	8530/3: Inflammatory carcinoma	8530/3: Inflammatory carcinoma	8500-8549: ductal and lobular neoplasms	Not Brain	XI(f.6) Carcinomas of breast	Female Breast	IV	IV	IIIC	AJCC 6th ed derived from CS manual/coding instructions, v1.0	Blank(s)	Blank(s)	N/A	T4d	N3c	M1	T4d	N3c	M1	Blank(s)	Blank(s)	Blank(s)	T4d	N3
30-34 years	White	Female	2012	Connecticut - 1973+	Not applicable (1973-2004, 2005 not Louisiana, or 2006+)	9	CT: New Haven County (09009)	Yes	CHSDA	East	Connecticut	Breast	Malignant	8.4 Carcinoma of breast	Unclassified	XI(f) Other and unspecified carcinomas	Breast	Breast	C50.9-Breast, NOS	509	8530	Malignant	Poorly differentiated; Grade III	Right - origin of primary	Positive histology	8530/3: Inflammatory carcinoma	8530/3: Inflammatory carcinoma	8500-8549: ductal and lobular neoplasms	Not Brain	XI(f.6) Carcinomas of breast	Female Breast	IV	IV	IV	AJCC 6th ed derived from CS manual/coding instructions, v1.0	Blank(s)	Blank(s)	N/A	T4d	N1	M1	T4d	N1	M1	Blank(s)	Blank(s)	Blank(s)	Any T, Mets	N1
30-34 years	White	Female	2012	Connecticut - 1973+	Not applicable (1973-2004, 2005 not Louisiana, or 2006+)	9	CT: New Haven County (09009)	Yes	CHSDA	East	Connecticut	Breast	Malignant	8.4 Carcinoma of breast	Unclassified	XI(f) Other and unspecified carcinomas	Breast	Breast	C50.9-Breast, NOS	509	8530	Malignant	Poorly differentiated; Grade III	Left - origin of primary	Positive histology	8530/3: Inflammatory carcinoma	8530/3: Inflammatory carcinoma	8500-8549: ductal and lobular neoplasms	Not Brain	XI(f.6) Carcinomas of breast	Female Breast	IV	IV	IV	AJCC 6th ed derived from CS manual/coding instructions, v1.0	Blank(s)	Blank(s)	N/A	T4d	N1	M1	T4d	N1	M1	Blank(s)	Blank(s)	Blank(s)	Any T, Mets	N1
45-49 years	White	Female	2012	Connecticut - 1973+	Not applicable (1973-2004, 2005 not Louisiana, or 2006+)	9	CT: New Haven County (09009)	Yes	CHSDA	East	Connecticut	Breast	Malignant	8.4 Carcinoma of breast	Unclassified	XI(f) Other and unspecified carcinomas	Breast	Breast	C50.9-Breast, NOS	509	8530	Malignant	Unknown	Right - origin of primary	Positive histology	8530/3: Inflammatory carcinoma	8530/3: Inflammatory carcinoma	8500-8549: ductal and lobular neoplasms	Not Brain	XI(f.6) Carcinomas of breast	Female Breast	IIIC	IIIC	IIIC	AJCC 6th ed derived from CS manual/coding instructions, v1.0	Blank(s)	Blank(s)	N/A	T4d	N3NOS	M0	T4d	N3NOS	M0	Blank(s)	Blank(s)	Blank(s)	T4d	N3
55-59 years	White	Female	2012	Connecticut - 1973+	Not applicable (1973-2004, 2005 not Louisiana, or 2006+)	5	CT: Litchfield County (09005)	Yes	CHSDA	East	Connecticut	Breast	Malignant	8.4 Carcinoma of breast	Unclassified	XI(f) Other and unspecified carcinomas	Breast	Breast	C50.8-Overlapping lesion of breast	508	8530	Malignant	Poorly differentiated; Grade III	Right - origin of primary	Positive histology	8530/3: Inflammatory carcinoma	8530/3: Inflammatory carcinoma	8500-8549: ductal and lobular neoplasms	Not Brain	XI(f.6) Carcinomas of breast	Female Breast	IV	IV	IIIC	AJCC 6th ed derived from CS manual/coding instructions, v1.0	Blank(s)	Blank(s)	N/A	T4d	N3a	M1	T4d	N3a	M1	Blank(s)	Blank(s)	Blank(s)	T4d	N3
85+ years	White	Female	2012	Connecticut - 1973+	Not applicable (1973-2004, 2005 not Louisiana, or 2006+)	3	CT: Hartford County (09003)	Yes	CHSDA	East	Connecticut	Breast	Malignant	8.4 Carcinoma of breast	Unclassified	XI(f) Other and unspecified carcinomas	Breast	Breast	C50.9-Breast, NOS	509	8530	Malignant	Unknown	Left - origin of primary	Positive histology	8530/3: Inflammatory carcinoma	8530/3: Inflammatory carcinoma	8500-8549: ductal and lobular neoplasms	Not Brain	XI(f.6) Carcinomas of breast	Female Breast	IIIB	IIIB	IIIB	AJCC 6th ed derived from CS manual/coding instructions, v1.0	Blank(s)	Blank(s)	N/A	T4d	N0	M0	T4d	N0	M0	Blank(s)	Blank(s)	Blank(s)	T4d	N0
40-44 years	White	Female	2013	Connecticut - 1973+	Not applicable (1973-2004, 2005 not Louisiana, or 2006+)	5	CT: Litchfield County (09005)	Yes	CHSDA	East	Connecticut	Breast	Malignant	8.4 Carcinoma of breast	Unclassified	XI(f) Other and unspecified carcinomas	Breast	Breast	C50.9-Breast, NOS	509	8530	Malignant	Poorly differentiated; Grade III	Left - origin of primary	Positive histology	8530/3: Inflammatory carcinoma	8530/3: Inflammatory carcinoma	8500-8549: ductal and lobular neoplasms	Not Brain	XI(f.6) Carcinomas of breast	Female Breast	IIIB	IIIB	IIIB	AJCC 6th ed derived from CS manual/coding instructions, v1.0	Blank(s)	Blank(s)	N/A	T4d	N1	M0	T4d	N1	M0	Blank(s)	Blank(s)	Blank(s)	T4d	N1
65-69 years	White	Female	2013	Connecticut - 1973+	Not applicable (1973-2004, 2005 not Louisiana, or 2006+)	3	CT: Hartford County (09003)	Yes	CHSDA	East	Connecticut	Breast	Malignant	8.4 Carcinoma of breast	Unclassified	XI(f) Other and unspecified carcinomas	Breast	Breast	C50.8-Overlapping lesion of breast	508	8530	Malignant	Moderately differentiated; Grade II	Right - origin of primary	Positive histology	8530/3: Inflammatory carcinoma	8530/3: Inflammatory carcinoma	8500-8549: ductal and lobular neoplasms	Not Brain	XI(f.6) Carcinomas of breast	Female Breast	IIIB	IIIB	IIIB	AJCC 6th ed derived from CS manual/coding instructions, v1.0	Blank(s)	Blank(s)	N/A	T4d	N2NOS	M0	T4d	N2NOS	M0	Blank(s)	Blank(s)	Blank(s)	T4d	N2
55-59 years	White	Female	2013	Connecticut - 1973+	Not applicable (1973-2004, 2005 not Louisiana, or 2006+)	3	CT: Hartford County (09003)	Yes	CHSDA	East	Connecticut	Breast	Malignant	8.4 Carcinoma of breast	Unclassified	XI(f) Other and unspecified carcinomas	Breast	Breast	C50.2-Upper-inner quadrant of breast	502	8530	Malignant	Poorly differentiated; Grade III	Right - origin of primary	Positive histology	8530/3: Inflammatory carcinoma	8530/3: Inflammatory carcinoma	8500-8549: ductal and lobular neoplasms	Not Brain	XI(f.6) Carcinomas of breast	Female Breast	IIIB	IIIB	IIIB	AJCC 6th ed derived from CS manual/coding instructions, v1.0	Blank(s)	Blank(s)	N/A	T4d	N2a	M0	T4d	N2a	M0	Blank(s)	Blank(s)	Blank(s)	T4d	N2
45-49 years	White	Female	2013	Connecticut - 1973+	Not applicable (1973-2004, 2005 not Louisiana, or 2006+)	13	CT: Tolland County (09013)	Yes	CHSDA	East	Connecticut	Breast	Malignant	8.4 Carcinoma of breast	Unclassified	XI(f) Other and unspecified carcinomas	Breast	Breast	C50.9-Breast, NOS	509	8530	Malignant	Poorly differentiated; Grade III	Left - origin of primary	Positive histology	8530/3: Inflammatory carcinoma	8530/3: Inflammatory carcinoma	8500-8549: ductal and lobular neoplasms	Not Brain	XI(f.6) Carcinomas of breast	Female Breast	IV	IV	IV	AJCC 6th ed derived from CS manual/coding instructions, v1.0	Blank(s)	Blank(s)	N/A	T4d	N1	M1	T4d	N1	M1	Blank(s)	Blank(s)	Blank(s)	Any T, Mets	N1
50-54 years	White	Female	2013	Connecticut - 1973+	Not applicable (1973-2004, 2005 not Louisiana, or 2006+)	1	CT: Fairfield County (09001)	Yes	CHSDA	East	Connecticut	Breast	Malignant	8.4 Carcinoma of breast	Unclassified	XI(f) Other and unspecified carcinomas	Breast	Breast	C50.9-Breast, NOS	509	8530	Malignant	Unknown	Left - origin of primary	Positive histology	8530/3: Inflammatory carcinoma	8530/3: Inflammatory carcinoma	8500-8549: ductal and lobular neoplasms	Not Brain	XI(f.6) Carcinomas of breast	Female Breast	IIIB	IIIB	IIIB	AJCC 6th ed derived from CS manual/coding instructions, v1.0	Blank(s)	Blank(s)	N/A	T4d	N2a	M0	T4d	N2a	M0	Blank(s)	Blank(s)	Blank(s)	T4d	N2
70-74 years	White	Female	2013	Connecticut - 1973+	Not applicable (1973-2004, 2005 not Louisiana, or 2006+)	1	CT: Fairfield County (09001)	Yes	CHSDA	East	Connecticut	Breast	Malignant	8.4 Carcinoma of breast	Unclassified	XI(f) Other and unspecified carcinomas	Breast	Breast	C50.4-Upper-outer quadrant of breast	504	8530	Malignant	Poorly differentiated; Grade III	Left - origin of primary	Positive histology	8530/3: Inflammatory carcinoma	8530/3: Inflammatory carcinoma	8500-8549: ductal and lobular neoplasms	Not Brain	XI(f.6) Carcinomas of breast	Female Breast	IV	IV	IV	AJCC 6th ed derived from CS manual/coding instructions, v1.0	Blank(s)	Blank(s)	N/A	T4d	NX	M1	T4d	NX	M1	Blank(s)	Blank(s)	Blank(s)	Any T, Mets	NX Adjusted
75-79 years	White	Female	2013	Connecticut - 1973+	Not applicable (1973-2004, 2005 not Louisiana, or 2006+)	1	CT: Fairfield County (09001)	Yes	CHSDA	East	Connecticut	Breast	Malignant	8.4 Carcinoma of breast	Unclassified	XI(f) Other and unspecified carcinomas	Breast	Breast	C50.9-Breast, NOS	509	8530	Malignant	Moderately differentiated; Grade II	Right - origin of primary	Positive histology	8530/3: Inflammatory carcinoma	8530/3: Inflammatory carcinoma	8500-8549: ductal and lobular neoplasms	Not Brain	XI(f.6) Carcinomas of breast	Female Breast	IV	IV	IV	AJCC 6th ed derived from CS manual/coding instructions, v1.0	Blank(s)	Blank(s)	N/A	T4d	N1	M1	T4d	N1	M1	Blank(s)	Blank(s)	Blank(s)	Any T, Mets	N3
60-64 years	White	Female	2013	Connecticut - 1973+	Not applicable (1973-2004, 2005 not Louisiana, or 2006+)	1	CT: Fairfield County (09001)	Yes	CHSDA	East	Connecticut	Breast	Malignant	8.4 Carcinoma of breast	Unclassified	XI(f) Other and unspecified carcinomas	Breast	Breast	C50.9-Breast, NOS	509	8530	Malignant	Poorly differentiated; Grade III	Right - origin of primary	Positive histology	8530/3: Inflammatory carcinoma	8530/3: Inflammatory carcinoma	8500-8549: ductal and lobular neoplasms	Not Brain	XI(f.6) Carcinomas of breast	Female Breast	IIIB	IIIB	IIIB	AJCC 6th ed derived from CS manual/coding instructions, v1.0	Blank(s)	Blank(s)	N/A	T4d	N0	M0	T4d	N0	M0	Blank(s)	Blank(s)	Blank(s)	T4d	N0
65-69 years	Black	Female	2013	Connecticut - 1973+	Not applicable (1973-2004, 2005 not Louisiana, or 2006+)	1	CT: Fairfield County (09001)	Yes	CHSDA	East	Connecticut	Breast	Malignant	8.4 Carcinoma of breast	Unclassified	XI(f) Other and unspecified carcinomas	Breast	Breast	C50.4-Upper-outer quadrant of breast	504	8530	Malignant	Moderately differentiated; Grade II	Left - origin of primary	Positive histology	8530/3: Inflammatory carcinoma	8530/3: Inflammatory carcinoma	8500-8549: ductal and lobular neoplasms	Not Brain	XI(f.6) Carcinomas of breast	Female Breast	IV	IV	IV	AJCC 6th ed derived from CS manual/coding instructions, v1.0	Blank(s)	Blank(s)	N/A	T4d	N3b	M1	T4d	N3b	M1	Blank(s)	Blank(s)	Blank(s)	Any T, Mets	N3
60-64 years	Black	Female	2013	Connecticut - 1973+	Not applicable (1973-2004, 2005 not Louisiana, or 2006+)	3	CT: Hartford County (09003)	Yes	CHSDA	East	Connecticut	Breast	Malignant	8.4 Carcinoma of breast	Unclassified	XI(f) Other and unspecified carcinomas	Breast	Breast	C50.8-Overlapping lesion of breast	508	8530	Malignant	Unknown	Right - origin of primary	Positive histology	8530/3: Inflammatory carcinoma	8530/3: Inflammatory carcinoma	8500-8549: ductal and lobular neoplasms	Not Brain	XI(f.6) Carcinomas of breast	Female Breast	IV	IV	IV	AJCC 6th ed derived from CS manual/coding instructions, v1.0	Blank(s)	Blank(s)	N/A	T4d	N1	M1	T4d	N1	M1	Blank(s)	Blank(s)	Blank(s)	Any T, Mets	N1
65-69 years	White	Female	2013	Connecticut - 1973+	Not applicable (1973-2004, 2005 not Louisiana, or 2006+)	5	CT: Litchfield County (09005)	Yes	CHSDA	East	Connecticut	Breast	Malignant	8.4 Carcinoma of breast	Unclassified	XI(f) Other and unspecified carcinomas	Breast	Breast	C50.4-Upper-outer quadrant of breast	504	8530	Malignant	Poorly differentiated; Grade III	Left - origin of primary	Positive histology	8530/3: Inflammatory carcinoma	8530/3: Inflammatory carcinoma	8500-8549: ductal and lobular neoplasms	Not Brain	XI(f.6) Carcinomas of breast	Female Breast	IIIB	IIIB	IIIB	AJCC 6th ed derived from CS manual/coding instructions, v1.0	Blank(s)	Blank(s)	N/A	T4d	N1	M0	T4d	N1	M0	Blank(s)	Blank(s)	Blank(s)	T4d	N1
30-34 years	White	Female	2013	Connecticut - 1973+	Not applicable (1973-2004, 2005 not Louisiana, or 2006+)	9	CT: New Haven County (09009)	Yes	CHSDA	East	Connecticut	Breast	Malignant	8.4 Carcinoma of breast	Unclassified	XI(f) Other and unspecified carcinomas	Breast	Breast	C50.8-Overlapping lesion of breast	508	8530	Malignant	Moderately differentiated; Grade II	Right - origin of primary	Positive histology	8530/3: Inflammatory carcinoma	8530/3: Inflammatory carcinoma	8500-8549: ductal and lobular neoplasms	Not Brain	XI(f.6) Carcinomas of breast	Female Breast	IV	IV	IV	AJCC 6th ed derived from CS manual/coding instructions, v1.0	Blank(s)	Blank(s)	N/A	T4d	N1	M1	T4d	N1	M1	Blank(s)	Blank(s)	Blank(s)	Any T, Mets	N1
85+ years	White	Female	2014	Connecticut - 1973+	Not applicable (1973-2004, 2005 not Louisiana, or 2006+)	1	CT: Fairfield County (09001)	Yes	CHSDA	East	Connecticut	Breast	Malignant	8.4 Carcinoma of breast	Unclassified	XI(f) Other and unspecified carcinomas	Breast	Breast	C50.3-Lower-inner quadrant of breast	503	8530	Malignant	Moderately differentiated; Grade II	Left - origin of primary	Positive histology	8530/3: Inflammatory carcinoma	8530/3: Inflammatory carcinoma	8500-8549: ductal and lobular neoplasms	Not Brain	XI(f.6) Carcinomas of breast	Female Breast	IIIB	IIIB	IIIB	AJCC 6th ed derived from CS manual/coding instructions, v1.0	Blank(s)	Blank(s)	N/A	T4d	N0	M0	T4d	N0	M0	Blank(s)	Blank(s)	Blank(s)	T4d	N0
50-54 years	White	Female	2014	Connecticut - 1973+	Not applicable (1973-2004, 2005 not Louisiana, or 2006+)	9	CT: New Haven County (09009)	Yes	CHSDA	East	Connecticut	Breast	Malignant	8.4 Carcinoma of breast	Unclassified	XI(f) Other and unspecified carcinomas	Breast	Breast	C50.9-Breast, NOS	509	8530	Malignant	Poorly differentiated; Grade III	Right - origin of primary	Positive histology	8530/3: Inflammatory carcinoma	8530/3: Inflammatory carcinoma	8500-8549: ductal and lobular neoplasms	Not Brain	XI(f.6) Carcinomas of breast	Female Breast	IV	IV	IV	AJCC 6th ed derived from CS manual/coding instructions, v1.0	Blank(s)	Blank(s)	N/A	T4d	N1	M1	T4d	N1	M1	Blank(s)	Blank(s)	Blank(s)	Any T, Mets	N1
45-49 years	White	Female	2014	Connecticut - 1973+	Not applicable (1973-2004, 2005 not Louisiana, or 2006+)	11	CT: New London County (09011)	Yes	CHSDA	East	Connecticut	Breast	Malignant	8.4 Carcinoma of breast	Unclassified	XI(f) Other and unspecified carcinomas	Breast	Breast	C50.4-Upper-outer quadrant of breast	504	8530	Malignant	Poorly differentiated; Grade III	Left - origin of primary	Positive histology	8530/3: Inflammatory carcinoma	8530/3: Inflammatory carcinoma	8500-8549: ductal and lobular neoplasms	Not Brain	XI(f.6) Carcinomas of breast	Female Breast	IIIB	IIIB	IIIB	AJCC 6th ed derived from CS manual/coding instructions, v1.0	Blank(s)	Blank(s)	N/A	T4d	N1mi	M0	T4d	N1mi	M0	Blank(s)	Blank(s)	Blank(s)	T4d	N1
35-39 years	Unknown	Female	2014	Connecticut - 1973+	Not applicable (1973-2004, 2005 not Louisiana, or 2006+)	9	CT: New Haven County (09009)	Yes	CHSDA	East	Connecticut	Breast	Malignant	8.4 Carcinoma of breast	Unclassified	XI(f) Other and unspecified carcinomas	Breast	Breast	C50.4-Upper-outer quadrant of breast	504	8530	Malignant	Poorly differentiated; Grade III	Left - origin of primary	Positive histology	8530/3: Inflammatory carcinoma	8530/3: Inflammatory carcinoma	8500-8549: ductal and lobular neoplasms	Not Brain	XI(f.6) Carcinomas of breast	Female Breast	IIIC	IIIC	IIIC	AJCC 6th ed derived from CS manual/coding instructions, v1.0	Blank(s)	Blank(s)	N/A	T4d	N3c	M0	T4d	N3c	M0	Blank(s)	Blank(s)	Blank(s)	T4d	N3
65-69 years	White	Female	2014	Connecticut - 1973+	Not applicable (1973-2004, 2005 not Louisiana, or 2006+)	3	CT: Hartford County (09003)	Yes	CHSDA	East	Connecticut	Breast	Malignant	8.4 Carcinoma of breast	Unclassified	XI(f) Other and unspecified carcinomas	Breast	Breast	C50.5-Lower-outer quadrant of breast	505	8530	Malignant	Poorly differentiated; Grade III	Left - origin of primary	Positive histology	8530/3: Inflammatory carcinoma	8530/3: Inflammatory carcinoma	8500-8549: ductal and lobular neoplasms	Not Brain	XI(f.6) Carcinomas of breast	Female Breast	IIIB	IIIB	IIIB	AJCC 6th ed derived from CS manual/coding instructions, v1.0	Blank(s)	Blank(s)	N/A	T4d	N1	M0	T4d	N1	M0	Blank(s)	Blank(s)	Blank(s)	T4d	N1
65-69 years	White	Female	2015	Connecticut - 1973+	Not applicable (1973-2004, 2005 not Louisiana, or 2006+)	1	CT: Fairfield County (09001)	Yes	CHSDA	East	Connecticut	Breast	Malignant	8.4 Carcinoma of breast	Unclassified	XI(f) Other and unspecified carcinomas	Breast	Breast	C50.1-Central portion of breast	501	8530	Malignant	Poorly differentiated; Grade III	Right - origin of primary	Positive histology	8530/3: Inflammatory carcinoma	8530/3: Inflammatory carcinoma	8500-8549: ductal and lobular neoplasms	Not Brain	XI(f.6) Carcinomas of breast	Female Breast	IV	IV	IV	AJCC 6th ed derived from CS manual/coding instructions, v1.0	Blank(s)	Blank(s)	N/A	T4d	N3c	M1	T4d	N3c	M1	Blank(s)	Blank(s)	Blank(s)	Any T, Mets	N3
75-79 years	White	Female	2015	Connecticut - 1973+	Not applicable (1973-2004, 2005 not Louisiana, or 2006+)	15	CT: Windham County (09015)	Yes	CHSDA	East	Connecticut	Breast	Malignant	8.4 Carcinoma of breast	Unclassified	XI(f) Other and unspecified carcinomas	Breast	Breast	C50.9-Breast, NOS	509	8530	Malignant	Poorly differentiated; Grade III	Right - origin of primary	Positive histology	8530/3: Inflammatory carcinoma	8530/3: Inflammatory carcinoma	8500-8549: ductal and lobular neoplasms	Not Brain	XI(f.6) Carcinomas of breast	Female Breast	IV	IV	IV	AJCC 6th ed derived from CS manual/coding instructions, v1.0	Blank(s)	Blank(s)	N/A	T4d	N0	M1	T4d	N0	M1	Blank(s)	Blank(s)	Blank(s)	Any T, Mets	N0
75-79 years	White	Female	2015	Connecticut - 1973+	Not applicable (1973-2004, 2005 not Louisiana, or 2006+)	3	CT: Hartford County (09003)	Yes	CHSDA	East	Connecticut	Breast	Malignant	8.4 Carcinoma of breast	Unclassified	XI(f) Other and unspecified carcinomas	Breast	Breast	C50.9-Breast, NOS	509	8530	Malignant	Poorly differentiated; Grade III	Left - origin of primary	Positive histology	8530/3: Inflammatory carcinoma	8530/3: Inflammatory carcinoma	8500-8549: ductal and lobular neoplasms	Not Brain	XI(f.6) Carcinomas of breast	Female Breast	IIIC	IIIC	IIIC	AJCC 6th ed derived from CS manual/coding instructions, v1.0	Blank(s)	Blank(s)	N/A	T4d	N3b	M0	T4d	N3b	M0	Blank(s)	Blank(s)	Blank(s)	T4d	N3
35-39 years	White	Female	2015	Connecticut - 1973+	Not applicable (1973-2004, 2005 not Louisiana, or 2006+)	13	CT: Tolland County (09013)	Yes	CHSDA	East	Connecticut	Breast	Malignant	8.4 Carcinoma of breast	Unclassified	XI(f) Other and unspecified carcinomas	Breast	Breast	C50.9-Breast, NOS	509	8530	Malignant	Moderately differentiated; Grade II	Left - origin of primary	Positive histology	8530/3: Inflammatory carcinoma	8530/3: Inflammatory carcinoma	8500-8549: ductal and lobular neoplasms	Not Brain	XI(f.6) Carcinomas of breast	Female Breast	IIIC	IIIC	IIIC	AJCC 6th ed derived from CS manual/coding instructions, v1.0	Blank(s)	Blank(s)	N/A	T4d	N3NOS	M0	T4d	N3NOS	M0	Blank(s)	Blank(s)	Blank(s)	T4d	N3
50-54 years	Black	Female	2015	Connecticut - 1973+	Not applicable (1973-2004, 2005 not Louisiana, or 2006+)	9	CT: New Haven County (09009)	Yes	CHSDA	East	Connecticut	Breast	Malignant	8.4 Carcinoma of breast	Unclassified	XI(f) Other and unspecified carcinomas	Breast	Breast	C50.9-Breast, NOS	509	8530	Malignant	Unknown	Right - origin of primary	Positive histology	8530/3: Inflammatory carcinoma	8530/3: Inflammatory carcinoma	8500-8549: ductal and lobular neoplasms	Not Brain	XI(f.6) Carcinomas of breast	Female Breast	IIIC	IIIC	IIIC	AJCC 6th ed derived from CS manual/coding instructions, v1.0	Blank(s)	Blank(s)	N/A	T4d	N3c	M0	T4d	N3c	M0	Blank(s)	Blank(s)	Blank(s)	T4d	N3
55-59 years	White	Female	2015	Connecticut - 1973+	Not applicable (1973-2004, 2005 not Louisiana, or 2006+)	9	CT: New Haven County (09009)	Yes	CHSDA	East	Connecticut	Breast	Malignant	8.4 Carcinoma of breast	Unclassified	XI(f) Other and unspecified carcinomas	Breast	Breast	C50.9-Breast, NOS	509	8530	Malignant	Poorly differentiated; Grade III	Left - origin of primary	Positive histology	8530/3: Inflammatory carcinoma	8530/3: Inflammatory carcinoma	8500-8549: ductal and lobular neoplasms	Not Brain	XI(f.6) Carcinomas of breast	Female Breast	IIIB	IIIB	IIIB	AJCC 6th ed derived from CS manual/coding instructions, v1.0	Blank(s)	Blank(s)	N/A	T4d	N1	M0	T4d	N1	M0	Blank(s)	Blank(s)	Blank(s)	T4d	N1
50-54 years	Black	Female	2015	Connecticut - 1973+	Not applicable (1973-2004, 2005 not Louisiana, or 2006+)	1	CT: Fairfield County (09001)	Yes	CHSDA	East	Connecticut	Breast	Malignant	8.4 Carcinoma of breast	Unclassified	XI(f) Other and unspecified carcinomas	Breast	Breast	C50.9-Breast, NOS	509	8530	Malignant	Poorly differentiated; Grade III	Right - origin of primary	Positive histology	8530/3: Inflammatory carcinoma	8530/3: Inflammatory carcinoma	8500-8549: ductal and lobular neoplasms	Not Brain	XI(f.6) Carcinomas of breast	Female Breast	IV	IV	IV	AJCC 6th ed derived from CS manual/coding instructions, v1.0	Blank(s)	Blank(s)	N/A	T4d	N3c	M1	T4d	N3c	M1	Blank(s)	Blank(s)	Blank(s)	Any T, Mets	N3
80-84 years	White	Female	2015	Connecticut - 1973+	Not applicable (1973-2004, 2005 not Louisiana, or 2006+)	1	CT: Fairfield County (09001)	Yes	CHSDA	East	Connecticut	Breast	Malignant	8.4 Carcinoma of breast	Unclassified	XI(f) Other and unspecified carcinomas	Breast	Breast	C50.9-Breast, NOS	509	8530	Malignant	Poorly differentiated; Grade III	Right - origin of primary	Positive histology	8530/3: Inflammatory carcinoma	8530/3: Inflammatory carcinoma	8500-8549: ductal and lobular neoplasms	Not Brain	XI(f.6) Carcinomas of breast	Female Breast	IV	IV	IV	AJCC 6th ed derived from CS manual/coding instructions, v1.0	Blank(s)	Blank(s)	N/A	T4d	N2NOS	M1	T4d	N2NOS	M1	Blank(s)	Blank(s)	Blank(s)	Any T, Mets	N3
35-39 years	White	Female	2012	Detroit (Metropolitan) - 1973+	Not applicable (1973-2004, 2005 not Louisiana, or 2006+)	125	MI: Oakland County (26125)	Yes	Not CHSDA	Northern Plains	Michigan	Breast	Malignant	8.4 Carcinoma of breast	Unclassified	XI(f) Other and unspecified carcinomas	Breast	Breast	C50.2-Upper-inner quadrant of breast	502	8530	Malignant	Poorly differentiated; Grade III	Right - origin of primary	Positive histology	8530/3: Inflammatory carcinoma	8530/3: Inflammatory carcinoma	8500-8549: ductal and lobular neoplasms	Not Brain	XI(f.6) Carcinomas of breast	Female Breast	IIIB	IIIB	IIIB	AJCC 6th ed derived from CS manual/coding instructions, v1.0	Blank(s)	Blank(s)	N/A	T4d	N0	M0	T4d	N0	M0	Blank(s)	Blank(s)	Blank(s)	T4d	N0
50-54 years	White	Female	2010	Detroit (Metropolitan) - 1973+	Not applicable (1973-2004, 2005 not Louisiana, or 2006+)	125	MI: Oakland County (26125)	Yes	Not CHSDA	Northern Plains	Michigan	Breast	Malignant	8.4 Carcinoma of breast	Unclassified	XI(f) Other and unspecified carcinomas	Breast	Breast	C50.9-Breast, NOS	509	8530	Malignant	Moderately differentiated; Grade II	Left - origin of primary	Positive histology	8530/3: Inflammatory carcinoma	8530/3: Inflammatory carcinoma	8500-8549: ductal and lobular neoplasms	Not Brain	XI(f.6) Carcinomas of breast	Female Breast	IIIB	IIIB	IIIB	AJCC 6th ed derived from CS manual/coding instructions, v1.0	Blank(s)	Blank(s)	N/A	T4d	N1a	M0	T4d	N1a	M0	Blank(s)	Blank(s)	Blank(s)	T4d	N1
60-64 years	Black	Female	2011	Detroit (Metropolitan) - 1973+	Not applicable (1973-2004, 2005 not Louisiana, or 2006+)	163	MI: Wayne County (26163)	Yes	Not CHSDA	Northern Plains	Michigan	Breast	Malignant	8.4 Carcinoma of breast	Unclassified	XI(f) Other and unspecified carcinomas	Breast	Breast	C50.8-Overlapping lesion of breast	508	8530	Malignant	Poorly differentiated; Grade III	Right - origin of primary	Positive histology	8530/3: Inflammatory carcinoma	8530/3: Inflammatory carcinoma	8500-8549: ductal and lobular neoplasms	Not Brain	XI(f.6) Carcinomas of breast	Female Breast	IIIB	IIIB	IIIB	AJCC 6th ed derived from CS manual/coding instructions, v1.0	Blank(s)	Blank(s)	N/A	T4d	N1	M0	T4d	N1	M0	Blank(s)	Blank(s)	Blank(s)	T4d	N1
45-49 years	White	Female	2010	Detroit (Metropolitan) - 1973+	Not applicable (1973-2004, 2005 not Louisiana, or 2006+)	125	MI: Oakland County (26125)	Yes	Not CHSDA	Northern Plains	Michigan	Breast	Malignant	8.4 Carcinoma of breast	Unclassified	XI(f) Other and unspecified carcinomas	Breast	Breast	C50.8-Overlapping lesion of breast	508	8530	Malignant	Poorly differentiated; Grade III	Right - origin of primary	Positive histology	8530/3: Inflammatory carcinoma	8530/3: Inflammatory carcinoma	8500-8549: ductal and lobular neoplasms	Not Brain	XI(f.6) Carcinomas of breast	Female Breast	IIIB	IIIB	IIIB	AJCC 6th ed derived from CS manual/coding instructions, v1.0	Blank(s)	Blank(s)	N/A	T4d	N0(i-)	M0	T4d	N0(i-)	M0	Blank(s)	Blank(s)	Blank(s)	T4d	N0
55-59 years	Black	Female	2010	Detroit (Metropolitan) - 1973+	Not applicable (1973-2004, 2005 not Louisiana, or 2006+)	163	MI: Wayne County (26163)	Yes	Not CHSDA	Northern Plains	Michigan	Breast	Malignant	8.4 Carcinoma of breast	Unclassified	XI(f) Other and unspecified carcinomas	Breast	Breast	C50.9-Breast, NOS	509	8530	Malignant	Poorly differentiated; Grade III	Right - origin of primary	Positive histology	8530/3: Inflammatory carcinoma	8530/3: Inflammatory carcinoma	8500-8549: ductal and lobular neoplasms	Not Brain	XI(f.6) Carcinomas of breast	Female Breast	IV	IV	IV	AJCC 6th ed derived from CS manual/coding instructions, v1.0	Blank(s)	Blank(s)	N/A	T4d	N0	M1	T4d	N0	M1	Blank(s)	Blank(s)	Blank(s)	Any T, Mets	N3
40-44 years	Black	Female	2010	Detroit (Metropolitan) - 1973+	Not applicable (1973-2004, 2005 not Louisiana, or 2006+)	163	MI: Wayne County (26163)	Yes	Not CHSDA	Northern Plains	Michigan	Breast	Malignant	8.4 Carcinoma of breast	Unclassified	XI(f) Other and unspecified carcinomas	Breast	Breast	C50.2-Upper-inner quadrant of breast	502	8530	Malignant	Poorly differentiated; Grade III	Right - origin of primary	Positive histology	8530/3: Inflammatory carcinoma	8530/3: Inflammatory carcinoma	8500-8549: ductal and lobular neoplasms	Not Brain	XI(f.6) Carcinomas of breast	Female Breast	IV	IV	IV	AJCC 6th ed derived from CS manual/coding instructions, v1.0	Blank(s)	Blank(s)	N/A	T4d	N3b	M1	T4d	N3b	M1	Blank(s)	Blank(s)	Blank(s)	Any T, Mets	N3
60-64 years	White	Female	2010	Detroit (Metropolitan) - 1973+	Not applicable (1973-2004, 2005 not Louisiana, or 2006+)	163	MI: Wayne County (26163)	Yes	Not CHSDA	Northern Plains	Michigan	Breast	Malignant	8.4 Carcinoma of breast	Unclassified	XI(f) Other and unspecified carcinomas	Breast	Breast	C50.2-Upper-inner quadrant of breast	502	8530	Malignant	Moderately differentiated; Grade II	Left - origin of primary	Positive histology	8530/3: Inflammatory carcinoma	8530/3: Inflammatory carcinoma	8500-8549: ductal and lobular neoplasms	Not Brain	XI(f.6) Carcinomas of breast	Female Breast	IIIB	IIIB	IIIB	AJCC 6th ed derived from CS manual/coding instructions, v1.0	Blank(s)	Blank(s)	N/A	T4d	N0(i-)	M0	T4d	N0(i-)	M0	Blank(s)	Blank(s)	Blank(s)	T4d	N0
85+ years	White	Female	2010	Detroit (Metropolitan) - 1973+	Not applicable (1973-2004, 2005 not Louisiana, or 2006+)	163	MI: Wayne County (26163)	Yes	Not CHSDA	Northern Plains	Michigan	Breast	Malignant	8.4 Carcinoma of breast	Unclassified	XI(f) Other and unspecified carcinomas	Breast	Breast	C50.9-Breast, NOS	509	8530	Malignant	Unknown	Left - origin of primary	Positive histology	8530/3: Inflammatory carcinoma	8530/3: Inflammatory carcinoma	8500-8549: ductal and lobular neoplasms	Not Brain	XI(f.6) Carcinomas of breast	Female Breast	IIINOS	UNK Stage	UNK Stage	AJCC 6th ed derived from CS manual/coding instructions, v1.0	Blank(s)	Blank(s)	N/A	T4d	NX	M0	T4d	NX	MX	Blank(s)	Blank(s)	Blank(s)	TX Adjusted	NX Adjusted
40-44 years	White	Female	2011	Detroit (Metropolitan) - 1973+	Not applicable (1973-2004, 2005 not Louisiana, or 2006+)	125	MI: Oakland County (26125)	Yes	Not CHSDA	Northern Plains	Michigan	Breast	Malignant	8.4 Carcinoma of breast	Unclassified	XI(f) Other and unspecified carcinomas	Breast	Breast	C50.8-Overlapping lesion of breast	508	8530	Malignant	Poorly differentiated; Grade III	Left - origin of primary	Positive histology	8530/3: Inflammatory carcinoma	8530/3: Inflammatory carcinoma	8500-8549: ductal and lobular neoplasms	Not Brain	XI(f.6) Carcinomas of breast	Female Breast	IIIB	IIIB	IIIB	AJCC 6th ed derived from CS manual/coding instructions, v1.0	Blank(s)	Blank(s)	N/A	T4d	N1	M0	T4d	N1	M0	Blank(s)	Blank(s)	Blank(s)	T4d	N1
45-49 years	Black	Female	2012	Detroit (Metropolitan) - 1973+	Not applicable (1973-2004, 2005 not Louisiana, or 2006+)	163	MI: Wayne County (26163)	Yes	Not CHSDA	Northern Plains	Michigan	Breast	Malignant	8.4 Carcinoma of breast	Unclassified	XI(f) Other and unspecified carcinomas	Breast	Breast	C50.4-Upper-outer quadrant of breast	504	8530	Malignant	Poorly differentiated; Grade III	Right - origin of primary	Positive histology	8530/3: Inflammatory carcinoma	8530/3: Inflammatory carcinoma	8500-8549: ductal and lobular neoplasms	Not Brain	XI(f.6) Carcinomas of breast	Female Breast	IIIC	IIIC	IIIC	AJCC 6th ed derived from CS manual/coding instructions, v1.0	Blank(s)	Blank(s)	N/A	T4d	N3a	M0	T4d	N3a	M0	Blank(s)	Blank(s)	Blank(s)	T4d	N3
60-64 years	White	Female	2012	Detroit (Metropolitan) - 1973+	Not applicable (1973-2004, 2005 not Louisiana, or 2006+)	125	MI: Oakland County (26125)	Yes	Not CHSDA	Northern Plains	Michigan	Breast	Malignant	8.4 Carcinoma of breast	Unclassified	XI(f) Other and unspecified carcinomas	Breast	Breast	C50.8-Overlapping lesion of breast	508	8530	Malignant	Moderately differentiated; Grade II	Right - origin of primary	Positive histology	8530/3: Inflammatory carcinoma	8530/3: Inflammatory carcinoma	8500-8549: ductal and lobular neoplasms	Not Brain	XI(f.6) Carcinomas of breast	Female Breast	IIIB	IIIB	IIIB	AJCC 6th ed derived from CS manual/coding instructions, v1.0	Blank(s)	Blank(s)	N/A	T4d	N0	M0	T4d	N0	M0	Blank(s)	Blank(s)	Blank(s)	T4d	N0
50-54 years	White	Female	2012	Detroit (Metropolitan) - 1973+	Not applicable (1973-2004, 2005 not Louisiana, or 2006+)	163	MI: Wayne County (26163)	Yes	Not CHSDA	Northern Plains	Michigan	Breast	Malignant	8.4 Carcinoma of breast	Unclassified	XI(f) Other and unspecified carcinomas	Breast	Breast	C50.4-Upper-outer quadrant of breast	504	8530	Malignant	Moderately differentiated; Grade II	Right - origin of primary	Positive histology	8530/3: Inflammatory carcinoma	8530/3: Inflammatory carcinoma	8500-8549: ductal and lobular neoplasms	Not Brain	XI(f.6) Carcinomas of breast	Female Breast	IIIB	IIIB	IIIB	AJCC 6th ed derived from CS manual/coding instructions, v1.0	Blank(s)	Blank(s)	N/A	T4d	N1	M0	T4d	N1	M0	Blank(s)	Blank(s)	Blank(s)	T4d	N1
65-69 years	White	Female	2013	Detroit (Metropolitan) - 1973+	Not applicable (1973-2004, 2005 not Louisiana, or 2006+)	163	MI: Wayne County (26163)	Yes	Not CHSDA	Northern Plains	Michigan	Breast	Malignant	8.4 Carcinoma of breast	Unclassified	XI(f) Other and unspecified carcinomas	Breast	Breast	C50.8-Overlapping lesion of breast	508	8530	Malignant	Moderately differentiated; Grade II	Right - origin of primary	Positive histology	8530/3: Inflammatory carcinoma	8530/3: Inflammatory carcinoma	8500-8549: ductal and lobular neoplasms	Not Brain	XI(f.6) Carcinomas of breast	Female Breast	IIIB	IIIB	IIIB	AJCC 6th ed derived from CS manual/coding instructions, v1.0	Blank(s)	Blank(s)	N/A	T4d	N0	M0	T4d	N0	M0	Blank(s)	Blank(s)	Blank(s)	T4d	N0
35-39 years	White	Female	2012	Detroit (Metropolitan) - 1973+	Not applicable (1973-2004, 2005 not Louisiana, or 2006+)	125	MI: Oakland County (26125)	Yes	Not CHSDA	Northern Plains	Michigan	Breast	Malignant	8.4 Carcinoma of breast	Unclassified	XI(f) Other and unspecified carcinomas	Breast	Breast	C50.8-Overlapping lesion of breast	508	8530	Malignant	Poorly differentiated; Grade III	Left - origin of primary	Positive histology	8530/3: Inflammatory carcinoma	8530/3: Inflammatory carcinoma	8500-8549: ductal and lobular neoplasms	Not Brain	XI(f.6) Carcinomas of breast	Female Breast	IIIB	IIIB	IIIB	AJCC 6th ed derived from CS manual/coding instructions, v1.0	Blank(s)	Blank(s)	N/A	T4d	N1	M0	T4d	N1	M0	Blank(s)	Blank(s)	Blank(s)	T4d	N1
60-64 years	White	Female	2012	Detroit (Metropolitan) - 1973+	Not applicable (1973-2004, 2005 not Louisiana, or 2006+)	99	MI: Macomb County (26099)	Yes	Not CHSDA	Northern Plains	Michigan	Breast	Malignant	8.4 Carcinoma of breast	Unclassified	XI(f) Other and unspecified carcinomas	Breast	Breast	C50.9-Breast, NOS	509	8530	Malignant	Poorly differentiated; Grade III	Left - origin of primary	Positive histology	8530/3: Inflammatory carcinoma	8530/3: Inflammatory carcinoma	8500-8549: ductal and lobular neoplasms	Not Brain	XI(f.6) Carcinomas of breast	Female Breast	IV	IV	IV	AJCC 6th ed derived from CS manual/coding instructions, v1.0	Blank(s)	Blank(s)	N/A	T4d	NX	M1	T4d	NX	M1	Blank(s)	Blank(s)	Blank(s)	Any T, Mets	NX Adjusted
70-74 years	White	Female	2012	Detroit (Metropolitan) - 1973+	Not applicable (1973-2004, 2005 not Louisiana, or 2006+)	125	MI: Oakland County (26125)	Yes	Not CHSDA	Northern Plains	Michigan	Breast	Malignant	8.4 Carcinoma of breast	Unclassified	XI(f) Other and unspecified carcinomas	Breast	Breast	C50.9-Breast, NOS	509	8530	Malignant	Moderately differentiated; Grade II	Left - origin of primary	Positive histology	8530/3: Inflammatory carcinoma	8530/3: Inflammatory carcinoma	8500-8549: ductal and lobular neoplasms	Not Brain	XI(f.6) Carcinomas of breast	Female Breast	IV	IV	IV	AJCC 6th ed derived from CS manual/coding instructions, v1.0	Blank(s)	Blank(s)	N/A	T4d	N3NOS	M1	T4d	N3NOS	M1	Blank(s)	Blank(s)	Blank(s)	Any T, Mets	N3
50-54 years	Black	Female	2013	Detroit (Metropolitan) - 1973+	Not applicable (1973-2004, 2005 not Louisiana, or 2006+)	163	MI: Wayne County (26163)	Yes	Not CHSDA	Northern Plains	Michigan	Breast	Malignant	8.4 Carcinoma of breast	Unclassified	XI(f) Other and unspecified carcinomas	Breast	Breast	C50.4-Upper-outer quadrant of breast	504	8530	Malignant	Unknown	Left - origin of primary	Positive histology	8530/3: Inflammatory carcinoma	8530/3: Inflammatory carcinoma	8500-8549: ductal and lobular neoplasms	Not Brain	XI(f.6) Carcinomas of breast	Female Breast	IIIC	IIIC	IIIC	AJCC 6th ed derived from CS manual/coding instructions, v1.0	Blank(s)	Blank(s)	N/A	T4d	N3c	M0	T4d	N3c	M0	Blank(s)	Blank(s)	Blank(s)	T4d	N3
55-59 years	White	Female	2014	Detroit (Metropolitan) - 1973+	Not applicable (1973-2004, 2005 not Louisiana, or 2006+)	163	MI: Wayne County (26163)	Yes	Not CHSDA	Northern Plains	Michigan	Breast	Malignant	8.4 Carcinoma of breast	Unclassified	XI(f) Other and unspecified carcinomas	Breast	Breast	C50.2-Upper-inner quadrant of breast	502	8530	Malignant	Poorly differentiated; Grade III	Right - origin of primary	Positive histology	8530/3: Inflammatory carcinoma	8530/3: Inflammatory carcinoma	8500-8549: ductal and lobular neoplasms	Not Brain	XI(f.6) Carcinomas of breast	Female Breast	IIIB	IIIB	IIIB	AJCC 6th ed derived from CS manual/coding instructions, v1.0	Blank(s)	Blank(s)	N/A	T4d	N2NOS	M0	T4d	N2NOS	M0	Blank(s)	Blank(s)	Blank(s)	T4d	N2
65-69 years	White	Female	2014	Detroit (Metropolitan) - 1973+	Not applicable (1973-2004, 2005 not Louisiana, or 2006+)	125	MI: Oakland County (26125)	Yes	Not CHSDA	Northern Plains	Michigan	Breast	Malignant	8.4 Carcinoma of breast	Unclassified	XI(f) Other and unspecified carcinomas	Breast	Breast	C50.9-Breast, NOS	509	8530	Malignant	Unknown	Right - origin of primary	Positive histology	8530/3: Inflammatory carcinoma	8530/3: Inflammatory carcinoma	8500-8549: ductal and lobular neoplasms	Not Brain	XI(f.6) Carcinomas of breast	Female Breast	IV	IV	IIIC	AJCC 6th ed derived from CS manual/coding instructions, v1.0	Blank(s)	Blank(s)	N/A	T4d	N0	M1	T4d	N0	M1	Blank(s)	Blank(s)	Blank(s)	T4d	N3
65-69 years	Black	Female	2015	Detroit (Metropolitan) - 1973+	Not applicable (1973-2004, 2005 not Louisiana, or 2006+)	163	MI: Wayne County (26163)	Yes	Not CHSDA	Northern Plains	Michigan	Breast	Malignant	8.4 Carcinoma of breast	Unclassified	XI(f) Other and unspecified carcinomas	Breast	Breast	C50.8-Overlapping lesion of breast	508	8530	Malignant	Poorly differentiated; Grade III	Left - origin of primary	Positive histology	8530/3: Inflammatory carcinoma	8530/3: Inflammatory carcinoma	8500-8549: ductal and lobular neoplasms	Not Brain	XI(f.6) Carcinomas of breast	Female Breast	IIIC	IIIC	IIIC	AJCC 6th ed derived from CS manual/coding instructions, v1.0	Blank(s)	Blank(s)	N/A	T4d	N3c	M0	T4d	N3c	M0	Blank(s)	Blank(s)	Blank(s)	T4d	N3
60-64 years	Black	Female	2015	Detroit (Metropolitan) - 1973+	Not applicable (1973-2004, 2005 not Louisiana, or 2006+)	163	MI: Wayne County (26163)	Yes	Not CHSDA	Northern Plains	Michigan	Breast	Malignant	8.4 Carcinoma of breast	Unclassified	XI(f) Other and unspecified carcinomas	Breast	Breast	C50.4-Upper-outer quadrant of breast	504	8530	Malignant	Unknown	Left - origin of primary	Positive histology	8530/3: Inflammatory carcinoma	8530/3: Inflammatory carcinoma	8500-8549: ductal and lobular neoplasms	Not Brain	XI(f.6) Carcinomas of breast	Female Breast	IV	IV	IV	AJCC 6th ed derived from CS manual/coding instructions, v1.0	Blank(s)	Blank(s)	N/A	T4d	NX	M1	T4d	NX	M1	Blank(s)	Blank(s)	Blank(s)	Any T, Mets	NX Adjusted
55-59 years	Black	Female	2015	Detroit (Metropolitan) - 1973+	Not applicable (1973-2004, 2005 not Louisiana, or 2006+)	163	MI: Wayne County (26163)	Yes	Not CHSDA	Northern Plains	Michigan	Breast	Malignant	8.4 Carcinoma of breast	Unclassified	XI(f) Other and unspecified carcinomas	Breast	Breast	C50.4-Upper-outer quadrant of breast	504	8530	Malignant	Moderately differentiated; Grade II	Left - origin of primary	Positive histology	8530/3: Inflammatory carcinoma	8530/3: Inflammatory carcinoma	8500-8549: ductal and lobular neoplasms	Not Brain	XI(f.6) Carcinomas of breast	Female Breast	IV	IV	IV	AJCC 6th ed derived from CS manual/coding instructions, v1.0	Blank(s)	Blank(s)	N/A	T4d	N1	M1	T4d	N1	M1	Blank(s)	Blank(s)	Blank(s)	Any T, Mets	N1
65-69 years	White	Female	2015	Detroit (Metropolitan) - 1973+	Not applicable (1973-2004, 2005 not Louisiana, or 2006+)	163	MI: Wayne County (26163)	Yes	Not CHSDA	Northern Plains	Michigan	Breast	Malignant	8.4 Carcinoma of breast	Unclassified	XI(f) Other and unspecified carcinomas	Breast	Breast	C50.9-Breast, NOS	509	8530	Malignant	Unknown	Left - origin of primary	Positive histology	8530/3: Inflammatory carcinoma	8530/3: Inflammatory carcinoma	8500-8549: ductal and lobular neoplasms	Not Brain	XI(f.6) Carcinomas of breast	Female Breast	IIIB	IIIB	IIIB	AJCC 6th ed derived from CS manual/coding instructions, v1.0	Blank(s)	Blank(s)	N/A	T4d	N1a	M0	T4d	N1a	M0	Blank(s)	Blank(s)	Blank(s)	T4d	N1
85+ years	Black	Female	2015	Detroit (Metropolitan) - 1973+	Not applicable (1973-2004, 2005 not Louisiana, or 2006+)	163	MI: Wayne County (26163)	Yes	Not CHSDA	Northern Plains	Michigan	Breast	Malignant	8.4 Carcinoma of breast	Unclassified	XI(f) Other and unspecified carcinomas	Breast	Breast	C50.4-Upper-outer quadrant of breast	504	8530	Malignant	Poorly differentiated; Grade III	Left - origin of primary	Positive histology	8530/3: Inflammatory carcinoma	8530/3: Inflammatory carcinoma	8500-8549: ductal and lobular neoplasms	Not Brain	XI(f.6) Carcinomas of breast	Female Breast	IIIB	IIIB	IIIB	AJCC 6th ed derived from CS manual/coding instructions, v1.0	Blank(s)	Blank(s)	N/A	T4d	N1	M0	T4d	N1	M0	Blank(s)	Blank(s)	Blank(s)	T4d	N1
30-34 years	White	Female	2010	Hawaii - 1973+	Not applicable (1973-2004, 2005 not Louisiana, or 2006+)	3	HI: Honolulu County (15003) - 2000+	Yes	Not CHSDA	Pacific Coast	Hawaii	Breast	Malignant	8.4 Carcinoma of breast	Unclassified	XI(f) Other and unspecified carcinomas	Breast	Breast	C50.9-Breast, NOS	509	8530	Malignant	Moderately differentiated; Grade II	Left - origin of primary	Positive histology	8530/3: Inflammatory carcinoma	8530/3: Inflammatory carcinoma	8500-8549: ductal and lobular neoplasms	Not Brain	XI(f.6) Carcinomas of breast	Female Breast	IIIC	IIIC	IIIC	AJCC 6th ed derived from CS manual/coding instructions, v1.0	Blank(s)	Blank(s)	N/A	T4d	N3b	M0	T4d	N3b	M0	Blank(s)	Blank(s)	Blank(s)	T4d	N3
30-34 years	Other (American Indian/AK Native, Asian/Pacific Islander)	Female	2010	Hawaii - 1973+	Not applicable (1973-2004, 2005 not Louisiana, or 2006+)	3	HI: Honolulu County (15003) - 2000+	Yes	Not CHSDA	Pacific Coast	Hawaii	Breast	Malignant	8.4 Carcinoma of breast	Unclassified	XI(f) Other and unspecified carcinomas	Breast	Breast	C50.9-Breast, NOS	509	8530	Malignant	Poorly differentiated; Grade III	Left - origin of primary	Positive histology	8530/3: Inflammatory carcinoma	8530/3: Inflammatory carcinoma	8500-8549: ductal and lobular neoplasms	Not Brain	XI(f.6) Carcinomas of breast	Female Breast	IV	IV	IV	AJCC 6th ed derived from CS manual/coding instructions, v1.0	Blank(s)	Blank(s)	N/A	T4d	N1	M1	T4d	N1	M1	Blank(s)	Blank(s)	Blank(s)	Any T, Mets	N3
75-79 years	Other (American Indian/AK Native, Asian/Pacific Islander)	Female	2011	Hawaii - 1973+	Not applicable (1973-2004, 2005 not Louisiana, or 2006+)	3	HI: Honolulu County (15003) - 2000+	Yes	Not CHSDA	Pacific Coast	Hawaii	Breast	Malignant	8.4 Carcinoma of breast	Unclassified	XI(f) Other and unspecified carcinomas	Breast	Breast	C50.8-Overlapping lesion of breast	508	8530	Malignant	Moderately differentiated; Grade II	Left - origin of primary	Positive histology	8530/3: Inflammatory carcinoma	8530/3: Inflammatory carcinoma	8500-8549: ductal and lobular neoplasms	Not Brain	XI(f.6) Carcinomas of breast	Female Breast	IIIB	IIIB	IIIB	AJCC 6th ed derived from CS manual/coding instructions, v1.0	Blank(s)	Blank(s)	N/A	T4d	N1a	M0	T4d	N1a	M0	Blank(s)	Blank(s)	Blank(s)	T4d	N1
60-64 years	White	Female	2011	Hawaii - 1973+	Not applicable (1973-2004, 2005 not Louisiana, or 2006+)	7	HI: Kauai County (15007) - 2000+	Yes	Not CHSDA	Pacific Coast	Hawaii	Breast	Malignant	8.4 Carcinoma of breast	Unclassified	XI(f) Other and unspecified carcinomas	Breast	Breast	C50.9-Breast, NOS	509	8530	Malignant	Moderately differentiated; Grade II	Bilateral, single primary	Positive histology	8530/3: Inflammatory carcinoma	8530/3: Inflammatory carcinoma	8500-8549: ductal and lobular neoplasms	Not Brain	XI(f.6) Carcinomas of breast	Female Breast	IIIB	IIIB	IIIB	AJCC 6th ed derived from CS manual/coding instructions, v1.0	Blank(s)	Blank(s)	N/A	T4d	N2a	M0	T4d	N2a	M0	Blank(s)	Blank(s)	Blank(s)	T4d	N2
60-64 years	Other (American Indian/AK Native, Asian/Pacific Islander)	Female	2012	Hawaii - 1973+	Not applicable (1973-2004, 2005 not Louisiana, or 2006+)	1	HI: Hawaii County (15001) - 2000+	Yes	Not CHSDA	Pacific Coast	Hawaii	Breast	Malignant	8.4 Carcinoma of breast	Unclassified	XI(f) Other and unspecified carcinomas	Breast	Breast	C50.9-Breast, NOS	509	8530	Malignant	Poorly differentiated; Grade III	Left - origin of primary	Positive histology	8530/3: Inflammatory carcinoma	8530/3: Inflammatory carcinoma	8500-8549: ductal and lobular neoplasms	Not Brain	XI(f.6) Carcinomas of breast	Female Breast	IV	IV	IV	AJCC 6th ed derived from CS manual/coding instructions, v1.0	Blank(s)	Blank(s)	N/A	T4d	N1	M1	T4d	N1	M1	Blank(s)	Blank(s)	Blank(s)	Any T, Mets	N1
55-59 years	Other (American Indian/AK Native, Asian/Pacific Islander)	Female	2015	Hawaii - 1973+	Not applicable (1973-2004, 2005 not Louisiana, or 2006+)	1	HI: Hawaii County (15001) - 2000+	Yes	Not CHSDA	Pacific Coast	Hawaii	Breast	Malignant	8.4 Carcinoma of breast	Unclassified	XI(f) Other and unspecified carcinomas	Breast	Breast	C50.3-Lower-inner quadrant of breast	503	8530	Malignant	Unknown	Right - origin of primary	Positive histology	8530/3: Inflammatory carcinoma	8530/3: Inflammatory carcinoma	8500-8549: ductal and lobular neoplasms	Not Brain	XI(f.6) Carcinomas of breast	Female Breast	IIIB	IIIB	IIIB	AJCC 6th ed derived from CS manual/coding instructions, v1.0	Blank(s)	Blank(s)	N/A	T4d	N1NOS	M0	T4d	N1NOS	M0	Blank(s)	Blank(s)	Blank(s)	T4d	N1
60-64 years	White	Female	2015	Hawaii - 1973+	Not applicable (1973-2004, 2005 not Louisiana, or 2006+)	7	HI: Kauai County (15007) - 2000+	Yes	Not CHSDA	Pacific Coast	Hawaii	Breast	Malignant	8.4 Carcinoma of breast	Unclassified	XI(f) Other and unspecified carcinomas	Breast	Breast	C50.8-Overlapping lesion of breast	508	8530	Malignant	Moderately differentiated; Grade II	Left - origin of primary	Positive histology	8530/3: Inflammatory carcinoma	8530/3: Inflammatory carcinoma	8500-8549: ductal and lobular neoplasms	Not Brain	XI(f.6) Carcinomas of breast	Female Breast	IV	IV	IV	AJCC 6th ed derived from CS manual/coding instructions, v1.0	Blank(s)	Blank(s)	N/A	T4d	N1	M1	T4d	N1	M1	Blank(s)	Blank(s)	Blank(s)	Any T, Mets	N1
60-64 years	White	Female	2012	Iowa - 1973+	Not applicable (1973-2004, 2005 not Louisiana, or 2006+)	51	IA: Davis County (19051)	Yes	Not CHSDA	Northern Plains	Iowa	Breast	Malignant	8.4 Carcinoma of breast	Unclassified	XI(f) Other and unspecified carcinomas	Breast	Breast	C50.9-Breast, NOS	509	8530	Malignant	Poorly differentiated; Grade III	Left - origin of primary	Positive histology	8530/3: Inflammatory carcinoma	8530/3: Inflammatory carcinoma	8500-8549: ductal and lobular neoplasms	Not Brain	XI(f.6) Carcinomas of breast	Female Breast	IIINOS	UNK Stage	UNK Stage	AJCC 6th ed derived from CS manual/coding instructions, v1.0	Blank(s)	Blank(s)	N/A	T4d	NX	M0	T4d	NX	MX	Blank(s)	Blank(s)	Blank(s)	TX Adjusted	NX Adjusted
75-79 years	White	Female	2010	Iowa - 1973+	Not applicable (1973-2004, 2005 not Louisiana, or 2006+)	13	IA: Black Hawk County (19013)	Yes	Not CHSDA	Northern Plains	Iowa	Breast	Malignant	8.4 Carcinoma of breast	Unclassified	XI(f) Other and unspecified carcinomas	Breast	Breast	C50.9-Breast, NOS	509	8530	Malignant	Poorly differentiated; Grade III	Right - origin of primary	Positive histology	8530/3: Inflammatory carcinoma	8530/3: Inflammatory carcinoma	8500-8549: ductal and lobular neoplasms	Not Brain	XI(f.6) Carcinomas of breast	Female Breast	IIIB	IIIB	IIIB	AJCC 6th ed derived from CS manual/coding instructions, v1.0	Blank(s)	Blank(s)	N/A	T4d	N1	M0	T4d	N1	M0	Blank(s)	Blank(s)	Blank(s)	T4d	N1
40-44 years	White	Female	2010	Iowa - 1973+	Not applicable (1973-2004, 2005 not Louisiana, or 2006+)	153	IA: Polk County (19153)	Yes	Not CHSDA	Northern Plains	Iowa	Breast	Malignant	8.4 Carcinoma of breast	Unclassified	XI(f) Other and unspecified carcinomas	Breast	Breast	C50.9-Breast, NOS	509	8530	Malignant	Poorly differentiated; Grade III	Right - origin of primary	Positive histology	8530/3: Inflammatory carcinoma	8530/3: Inflammatory carcinoma	8500-8549: ductal and lobular neoplasms	Not Brain	XI(f.6) Carcinomas of breast	Female Breast	IV	IV	IIIC	AJCC 6th ed derived from CS manual/coding instructions, v1.0	Blank(s)	Blank(s)	N/A	T4d	N3c	M1	T4d	N3c	M1	Blank(s)	Blank(s)	Blank(s)	T4d	N3
65-69 years	White	Female	2010	Iowa - 1973+	Not applicable (1973-2004, 2005 not Louisiana, or 2006+)	165	IA: Shelby County (19165)	Yes	Not CHSDA	Northern Plains	Iowa	Breast	Malignant	8.4 Carcinoma of breast	Unclassified	XI(f) Other and unspecified carcinomas	Breast	Breast	C50.4-Upper-outer quadrant of breast	504	8530	Malignant	Moderately differentiated; Grade II	Right - origin of primary	Positive histology	8530/3: Inflammatory carcinoma	8530/3: Inflammatory carcinoma	8500-8549: ductal and lobular neoplasms	Not Brain	XI(f.6) Carcinomas of breast	Female Breast	IIIC	IIIC	IIIC	AJCC 6th ed derived from CS manual/coding instructions, v1.0	Blank(s)	Blank(s)	N/A	T4d	N3a	M0	T4d	N3a	M0	Blank(s)	Blank(s)	Blank(s)	T4d	N3
45-49 years	White	Female	2011	Iowa - 1973+	Not applicable (1973-2004, 2005 not Louisiana, or 2006+)	183	IA: Washington County (19183)	Yes	Not CHSDA	Northern Plains	Iowa	Breast	Malignant	8.4 Carcinoma of breast	Unclassified	XI(f) Other and unspecified carcinomas	Breast	Breast	C50.8-Overlapping lesion of breast	508	8530	Malignant	Unknown	Right - origin of primary	Positive histology	8530/3: Inflammatory carcinoma	8530/3: Inflammatory carcinoma	8500-8549: ductal and lobular neoplasms	Not Brain	XI(f.6) Carcinomas of breast	Female Breast	IV	IV	IV	AJCC 6th ed derived from CS manual/coding instructions, v1.0	Blank(s)	Blank(s)	N/A	T4d	N3b	M1	T4d	N3b	M1	Blank(s)	Blank(s)	Blank(s)	Any T, Mets	N3
55-59 years	White	Female	2012	Iowa - 1973+	Not applicable (1973-2004, 2005 not Louisiana, or 2006+)	153	IA: Polk County (19153)	Yes	Not CHSDA	Northern Plains	Iowa	Breast	Malignant	8.4 Carcinoma of breast	Unclassified	XI(f) Other and unspecified carcinomas	Breast	Breast	C50.4-Upper-outer quadrant of breast	504	8530	Malignant	Poorly differentiated; Grade III	Right - origin of primary	Positive histology	8530/3: Inflammatory carcinoma	8530/3: Inflammatory carcinoma	8500-8549: ductal and lobular neoplasms	Not Brain	XI(f.6) Carcinomas of breast	Female Breast	IIIC	IIIC	IIIC	AJCC 6th ed derived from CS manual/coding instructions, v1.0	Blank(s)	Blank(s)	N/A	T4d	N3a	M0	T4d	N3a	M0	Blank(s)	Blank(s)	Blank(s)	T4d	N3
55-59 years	White	Female	2012	Iowa - 1973+	Not applicable (1973-2004, 2005 not Louisiana, or 2006+)	181	IA: Warren County (19181)	Yes	Not CHSDA	Northern Plains	Iowa	Breast	Malignant	8.4 Carcinoma of breast	Unclassified	XI(f) Other and unspecified carcinomas	Breast	Breast	C50.9-Breast, NOS	509	8530	Malignant	Moderately differentiated; Grade II	Left - origin of primary	Positive histology	8530/3: Inflammatory carcinoma	8530/3: Inflammatory carcinoma	8500-8549: ductal and lobular neoplasms	Not Brain	XI(f.6) Carcinomas of breast	Female Breast	IV	IV	IV	AJCC 6th ed derived from CS manual/coding instructions, v1.0	Blank(s)	Blank(s)	N/A	T4d	N1	M1	T4d	N1	M1	Blank(s)	Blank(s)	Blank(s)	Any T, Mets	N1
75-79 years	White	Female	2012	Iowa - 1973+	Not applicable (1973-2004, 2005 not Louisiana, or 2006+)	127	IA: Marshall County (19127)	Yes	Not CHSDA	Northern Plains	Iowa	Breast	Malignant	8.4 Carcinoma of breast	Unclassified	XI(f) Other and unspecified carcinomas	Breast	Breast	C50.9-Breast, NOS	509	8530	Malignant	Moderately differentiated; Grade II	Left - origin of primary	Positive histology	8530/3: Inflammatory carcinoma	8530/3: Inflammatory carcinoma	8500-8549: ductal and lobular neoplasms	Not Brain	XI(f.6) Carcinomas of breast	Female Breast	IIINOS	UNK Stage	UNK Stage	AJCC 6th ed derived from CS manual/coding instructions, v1.0	Blank(s)	Blank(s)	N/A	T4d	NX	M0	T4d	NX	MX	Blank(s)	Blank(s)	Blank(s)	TX Adjusted	NX Adjusted
80-84 years	White	Female	2012	Iowa - 1973+	Not applicable (1973-2004, 2005 not Louisiana, or 2006+)	67	IA: Floyd County (19067)	Yes	Not CHSDA	Northern Plains	Iowa	Breast	Malignant	8.4 Carcinoma of breast	Unclassified	XI(f) Other and unspecified carcinomas	Breast	Breast	C50.1-Central portion of breast	501	8530	Malignant	Poorly differentiated; Grade III	Left - origin of primary	Positive histology	8530/3: Inflammatory carcinoma	8530/3: Inflammatory carcinoma	8500-8549: ductal and lobular neoplasms	Not Brain	XI(f.6) Carcinomas of breast	Female Breast	IIIB	IIIB	IIIB	AJCC 6th ed derived from CS manual/coding instructions, v1.0	Blank(s)	Blank(s)	N/A	T4d	N0	M0	T4d	N0	M0	Blank(s)	Blank(s)	Blank(s)	T4d	N0
75-79 years	White	Female	2012	Iowa - 1973+	Not applicable (1973-2004, 2005 not Louisiana, or 2006+)	153	IA: Polk County (19153)	Yes	Not CHSDA	Northern Plains	Iowa	Breast	Malignant	8.4 Carcinoma of breast	Unclassified	XI(f) Other and unspecified carcinomas	Breast	Breast	C50.9-Breast, NOS	509	8530	Malignant	Unknown	Left - origin of primary	Positive histology	8530/3: Inflammatory carcinoma	8530/3: Inflammatory carcinoma	8500-8549: ductal and lobular neoplasms	Not Brain	XI(f.6) Carcinomas of breast	Female Breast	IIIB	IIIB	IIIB	AJCC 6th ed derived from CS manual/coding instructions, v1.0	Blank(s)	Blank(s)	N/A	T4d	N1	M0	T4d	N1	M0	Blank(s)	Blank(s)	Blank(s)	T4d	N1
45-49 years	White	Female	2012	Iowa - 1973+	Not applicable (1973-2004, 2005 not Louisiana, or 2006+)	13	IA: Black Hawk County (19013)	Yes	Not CHSDA	Northern Plains	Iowa	Breast	Malignant	8.4 Carcinoma of breast	Unclassified	XI(f) Other and unspecified carcinomas	Breast	Breast	C50.9-Breast, NOS	509	8530	Malignant	Poorly differentiated; Grade III	Left - origin of primary	Positive histology	8530/3: Inflammatory carcinoma	8530/3: Inflammatory carcinoma	8500-8549: ductal and lobular neoplasms	Not Brain	XI(f.6) Carcinomas of breast	Female Breast	IIIC	IIIC	IIIC	AJCC 6th ed derived from CS manual/coding instructions, v1.0	Blank(s)	Blank(s)	N/A	T4d	N3a	M0	T4d	N3a	M0	Blank(s)	Blank(s)	Blank(s)	T4d	N3
65-69 years	White	Female	2012	Iowa - 1973+	Not applicable (1973-2004, 2005 not Louisiana, or 2006+)	83	IA: Hardin County (19083)	Yes	Not CHSDA	Northern Plains	Iowa	Breast	Malignant	8.4 Carcinoma of breast	Unclassified	XI(f) Other and unspecified carcinomas	Breast	Breast	C50.4-Upper-outer quadrant of breast	504	8530	Malignant	Unknown	Left - origin of primary	Positive histology	8530/3: Inflammatory carcinoma	8530/3: Inflammatory carcinoma	8500-8549: ductal and lobular neoplasms	Not Brain	XI(f.6) Carcinomas of breast	Female Breast	IIIB	IIIB	IIIB	AJCC 6th ed derived from CS manual/coding instructions, v1.0	Blank(s)	Blank(s)	N/A	T4d	N2a	M0	T4d	N2a	M0	Blank(s)	Blank(s)	Blank(s)	T4d	N2
60-64 years	White	Female	2012	Iowa - 1973+	Not applicable (1973-2004, 2005 not Louisiana, or 2006+)	153	IA: Polk County (19153)	Yes	Not CHSDA	Northern Plains	Iowa	Breast	Malignant	8.4 Carcinoma of breast	Unclassified	XI(f) Other and unspecified carcinomas	Breast	Breast	C50.9-Breast, NOS	509	8530	Malignant	Poorly differentiated; Grade III	Left - origin of primary	Positive histology	8530/3: Inflammatory carcinoma	8530/3: Inflammatory carcinoma	8500-8549: ductal and lobular neoplasms	Not Brain	XI(f.6) Carcinomas of breast	Female Breast	IV	IV	IV	AJCC 6th ed derived from CS manual/coding instructions, v1.0	Blank(s)	Blank(s)	N/A	T4d	N1a	M1	T4d	N1a	M1	Blank(s)	Blank(s)	Blank(s)	Any T, Mets	N1
65-69 years	White	Female	2013	Iowa - 1973+	Not applicable (1973-2004, 2005 not Louisiana, or 2006+)	159	IA: Ringgold County (19159)	Yes	Not CHSDA	Northern Plains	Iowa	Breast	Malignant	8.4 Carcinoma of breast	Unclassified	XI(f) Other and unspecified carcinomas	Breast	Breast	C50.1-Central portion of breast	501	8530	Malignant	Moderately differentiated; Grade II	Right - origin of primary	Positive histology	8530/3: Inflammatory carcinoma	8530/3: Inflammatory carcinoma	8500-8549: ductal and lobular neoplasms	Not Brain	XI(f.6) Carcinomas of breast	Female Breast	IV	IV	IIIC	AJCC 6th ed derived from CS manual/coding instructions, v1.0	Blank(s)	Blank(s)	N/A	T4d	N1	M1	T4d	N1	M1	Blank(s)	Blank(s)	Blank(s)	T4d	N3
50-54 years	White	Female	2014	Iowa - 1973+	Not applicable (1973-2004, 2005 not Louisiana, or 2006+)	103	IA: Johnson County (19103)	Yes	Not CHSDA	Northern Plains	Iowa	Breast	Malignant	8.4 Carcinoma of breast	Unclassified	XI(f) Other and unspecified carcinomas	Breast	Breast	C50.9-Breast, NOS	509	8530	Malignant	Moderately differentiated; Grade II	Left - origin of primary	Positive histology	8530/3: Inflammatory carcinoma	8530/3: Inflammatory carcinoma	8500-8549: ductal and lobular neoplasms	Not Brain	XI(f.6) Carcinomas of breast	Female Breast	IIIC	IIIC	IIIC	AJCC 6th ed derived from CS manual/coding instructions, v1.0	Blank(s)	Blank(s)	N/A	T4d	N3c	M0	T4d	N3c	M0	Blank(s)	Blank(s)	Blank(s)	T4d	N3
60-64 years	White	Female	2014	Iowa - 1973+	Not applicable (1973-2004, 2005 not Louisiana, or 2006+)	163	IA: Scott County (19163)	Yes	Not CHSDA	Northern Plains	Iowa	Breast	Malignant	8.4 Carcinoma of breast	Unclassified	XI(f) Other and unspecified carcinomas	Breast	Breast	C50.9-Breast, NOS	509	8530	Malignant	Poorly differentiated; Grade III	Left - origin of primary	Positive histology	8530/3: Inflammatory carcinoma	8530/3: Inflammatory carcinoma	8500-8549: ductal and lobular neoplasms	Not Brain	XI(f.6) Carcinomas of breast	Female Breast	IIIB	IIIB	IIIB	AJCC 6th ed derived from CS manual/coding instructions, v1.0	Blank(s)	Blank(s)	N/A	T4d	N1	M0	T4d	N1	M0	Blank(s)	Blank(s)	Blank(s)	T4d	N1
45-49 years	White	Female	2015	Iowa - 1973+	Not applicable (1973-2004, 2005 not Louisiana, or 2006+)	127	IA: Marshall County (19127)	Yes	Not CHSDA	Northern Plains	Iowa	Breast	Malignant	8.4 Carcinoma of breast	Unclassified	XI(f) Other and unspecified carcinomas	Breast	Breast	C50.1-Central portion of breast	501	8530	Malignant	Moderately differentiated; Grade II	Right - origin of primary	Positive histology	8530/3: Inflammatory carcinoma	8530/3: Inflammatory carcinoma	8500-8549: ductal and lobular neoplasms	Not Brain	XI(f.6) Carcinomas of breast	Female Breast	IIIB	IIIB	IIIB	AJCC 6th ed derived from CS manual/coding instructions, v1.0	Blank(s)	Blank(s)	N/A	T4d	N2a	M0	T4d	N2a	M0	Blank(s)	Blank(s)	Blank(s)	T4d	N2
65-69 years	White	Female	2015	Iowa - 1973+	Not applicable (1973-2004, 2005 not Louisiana, or 2006+)	121	IA: Madison County (19121)	Yes	Not CHSDA	Northern Plains	Iowa	Breast	Malignant	8.4 Carcinoma of breast	Unclassified	XI(f) Other and unspecified carcinomas	Breast	Breast	C50.9-Breast, NOS	509	8530	Malignant	Unknown	Left - origin of primary	Positive histology	8530/3: Inflammatory carcinoma	8530/3: Inflammatory carcinoma	8500-8549: ductal and lobular neoplasms	Not Brain	XI(f.6) Carcinomas of breast	Female Breast	IV	IV	IV	AJCC 6th ed derived from CS manual/coding instructions, v1.0	Blank(s)	Blank(s)	N/A	T4d	N1	M1	T4d	N1	M1	Blank(s)	Blank(s)	Blank(s)	Any T, Mets	N3
60-64 years	White	Female	2010	New Mexico - 1973+	Not applicable (1973-2004, 2005 not Louisiana, or 2006+)	49	NM: Santa Fe County (35049)	Yes	CHSDA	Southwest	New Mexico	Breast	Malignant	8.4 Carcinoma of breast	Unclassified	XI(f) Other and unspecified carcinomas	Breast	Breast	C50.4-Upper-outer quadrant of breast	504	8530	Malignant	Poorly differentiated; Grade III	Left - origin of primary	Positive histology	8530/3: Inflammatory carcinoma	8530/3: Inflammatory carcinoma	8500-8549: ductal and lobular neoplasms	Not Brain	XI(f.6) Carcinomas of breast	Female Breast	IIIB	IIIB	IIIB	AJCC 6th ed derived from CS manual/coding instructions, v1.0	Blank(s)	Blank(s)	N/A	T4d	N2a	M0	T4d	N2a	M0	Blank(s)	Blank(s)	Blank(s)	T4d	N2
80-84 years	White	Female	2015	New Mexico - 1973+	Not applicable (1973-2004, 2005 not Louisiana, or 2006+)	1	NM: Bernalillo County (35001)	Yes	CHSDA	Southwest	New Mexico	Breast	Malignant	8.4 Carcinoma of breast	Unclassified	XI(f) Other and unspecified carcinomas	Breast	Breast	C50.9-Breast, NOS	509	8530	Malignant	Unknown	Right - origin of primary	Positive histology	8530/3: Inflammatory carcinoma	8530/3: Inflammatory carcinoma	8500-8549: ductal and lobular neoplasms	Not Brain	XI(f.6) Carcinomas of breast	Female Breast	IV	IV	IV	AJCC 6th ed derived from CS manual/coding instructions, v1.0	Blank(s)	Blank(s)	N/A	T4d	N2NOS	M1	T4d	N2NOS	M1	Blank(s)	Blank(s)	Blank(s)	Any T, Mets	N2
80-84 years	White	Female	2012	New Mexico - 1973+	Not applicable (1973-2004, 2005 not Louisiana, or 2006+)	5	NM: Chaves County (35005)	Yes	CHSDA	Southwest	New Mexico	Breast	Malignant	8.4 Carcinoma of breast	Unclassified	XI(f) Other and unspecified carcinomas	Breast	Breast	C50.9-Breast, NOS	509	8530	Malignant	Unknown	Left - origin of primary	Positive histology	8530/3: Inflammatory carcinoma	8530/3: Inflammatory carcinoma	8500-8549: ductal and lobular neoplasms	Not Brain	XI(f.6) Carcinomas of breast	Female Breast	IIIC	IIIC	IIIC	AJCC 6th ed derived from CS manual/coding instructions, v1.0	Blank(s)	Blank(s)	N/A	T4d	N3a	M0	T4d	N3a	M0	Blank(s)	Blank(s)	Blank(s)	T4d	N3
50-54 years	Other (American Indian/AK Native, Asian/Pacific Islander)	Female	2011	New Mexico - 1973+	Not applicable (1973-2004, 2005 not Louisiana, or 2006+)	39	NM: Rio Arriba County (35039)	Yes	CHSDA	Southwest	New Mexico	Breast	Malignant	8.4 Carcinoma of breast	Unclassified	XI(f) Other and unspecified carcinomas	Breast	Breast	C50.9-Breast, NOS	509	8530	Malignant	Unknown	Right - origin of primary	Positive histology	8530/3: Inflammatory carcinoma	8530/3: Inflammatory carcinoma	8500-8549: ductal and lobular neoplasms	Not Brain	XI(f.6) Carcinomas of breast	Female Breast	IIIB	IIIB	IIIB	AJCC 6th ed derived from CS manual/coding instructions, v1.0	Blank(s)	Blank(s)	N/A	T4d	N0	M0	T4d	N0	M0	Blank(s)	Blank(s)	Blank(s)	T4d	N0
55-59 years	Other (American Indian/AK Native, Asian/Pacific Islander)	Female	2010	New Mexico - 1973+	Not applicable (1973-2004, 2005 not Louisiana, or 2006+)	45	NM: San Juan County (35045)	Yes	CHSDA	Southwest	New Mexico	Breast	Malignant	8.4 Carcinoma of breast	Unclassified	XI(f) Other and unspecified carcinomas	Breast	Breast	C50.9-Breast, NOS	509	8530	Malignant	Moderately differentiated; Grade II	Left - origin of primary	Positive histology	8530/3: Inflammatory carcinoma	8530/3: Inflammatory carcinoma	8500-8549: ductal and lobular neoplasms	Not Brain	XI(f.6) Carcinomas of breast	Female Breast	IIIC	IIIC	IIIC	AJCC 6th ed derived from CS manual/coding instructions, v1.0	Blank(s)	Blank(s)	N/A	T4d	N3a	M0	T4d	N3a	M0	Blank(s)	Blank(s)	Blank(s)	T4d	N3
70-74 years	White	Female	2010	New Mexico - 1973+	Not applicable (1973-2004, 2005 not Louisiana, or 2006+)	49	NM: Santa Fe County (35049)	Yes	CHSDA	Southwest	New Mexico	Breast	Malignant	8.4 Carcinoma of breast	Unclassified	XI(f) Other and unspecified carcinomas	Breast	Breast	C50.8-Overlapping lesion of breast	508	8530	Malignant	Unknown	Right - origin of primary	Positive histology	8530/3: Inflammatory carcinoma	8530/3: Inflammatory carcinoma	8500-8549: ductal and lobular neoplasms	Not Brain	XI(f.6) Carcinomas of breast	Female Breast	IIIB	IIIB	IIIB	AJCC 6th ed derived from CS manual/coding instructions, v1.0	Blank(s)	Blank(s)	N/A	T4d	N0	M0	T4d	N0	M0	Blank(s)	Blank(s)	Blank(s)	T4d	N0
50-54 years	White	Female	2010	New Mexico - 1973+	Not applicable (1973-2004, 2005 not Louisiana, or 2006+)	43	NM: Sandoval County (35043)	Yes	CHSDA	Southwest	New Mexico	Breast	Malignant	8.4 Carcinoma of breast	Unclassified	XI(f) Other and unspecified carcinomas	Breast	Breast	C50.5-Lower-outer quadrant of breast	505	8530	Malignant	Unknown	Right - origin of primary	Positive histology	8530/3: Inflammatory carcinoma	8530/3: Inflammatory carcinoma	8500-8549: ductal and lobular neoplasms	Not Brain	XI(f.6) Carcinomas of breast	Female Breast	IIIB	IIIB	IIIB	AJCC 6th ed derived from CS manual/coding instructions, v1.0	Blank(s)	Blank(s)	N/A	T4d	N1mi	M0	T4d	N1mi	M0	Blank(s)	Blank(s)	Blank(s)	T4d	N1
60-64 years	Other (American Indian/AK Native, Asian/Pacific Islander)	Female	2011	New Mexico - 1973+	Not applicable (1973-2004, 2005 not Louisiana, or 2006+)	31	NM: McKinley County (35031)	Yes	CHSDA	Southwest	New Mexico	Breast	Malignant	8.4 Carcinoma of breast	Unclassified	XI(f) Other and unspecified carcinomas	Breast	Breast	C50.9-Breast, NOS	509	8530	Malignant	Poorly differentiated; Grade III	Right - origin of primary	Positive histology	8530/3: Inflammatory carcinoma	8530/3: Inflammatory carcinoma	8500-8549: ductal and lobular neoplasms	Not Brain	XI(f.6) Carcinomas of breast	Female Breast	IIIB	IIIB	IIIB	AJCC 6th ed derived from CS manual/coding instructions, v1.0	Blank(s)	Blank(s)	N/A	T4d	N1	M0	T4d	N1	M0	Blank(s)	Blank(s)	Blank(s)	T4d	N1
60-64 years	White	Female	2011	New Mexico - 1973+	Not applicable (1973-2004, 2005 not Louisiana, or 2006+)	39	NM: Rio Arriba County (35039)	Yes	CHSDA	Southwest	New Mexico	Breast	Malignant	8.4 Carcinoma of breast	Unclassified	XI(f) Other and unspecified carcinomas	Breast	Breast	C50.9-Breast, NOS	509	8530	Malignant	Poorly differentiated; Grade III	Left - origin of primary	Positive histology	8530/3: Inflammatory carcinoma	8530/3: Inflammatory carcinoma	8500-8549: ductal and lobular neoplasms	Not Brain	XI(f.6) Carcinomas of breast	Female Breast	IIIB	IIIB	IIIB	AJCC 6th ed derived from CS manual/coding instructions, v1.0	Blank(s)	Blank(s)	N/A	T4d	N1	M0	T4d	N1	M0	Blank(s)	Blank(s)	Blank(s)	T4d	N1
45-49 years	White	Female	2011	New Mexico - 1973+	Not applicable (1973-2004, 2005 not Louisiana, or 2006+)	45	NM: San Juan County (35045)	Yes	CHSDA	Southwest	New Mexico	Breast	Malignant	8.4 Carcinoma of breast	Unclassified	XI(f) Other and unspecified carcinomas	Breast	Breast	C50.9-Breast, NOS	509	8530	Malignant	Unknown	Right - origin of primary	Positive histology	8530/3: Inflammatory carcinoma	8530/3: Inflammatory carcinoma	8500-8549: ductal and lobular neoplasms	Not Brain	XI(f.6) Carcinomas of breast	Female Breast	IV	IV	IV	AJCC 6th ed derived from CS manual/coding instructions, v1.0	Blank(s)	Blank(s)	N/A	T4d	N3NOS	M1	T4d	N3NOS	M1	Blank(s)	Blank(s)	Blank(s)	Any T, Mets	N3
70-74 years	White	Female	2011	New Mexico - 1973+	Not applicable (1973-2004, 2005 not Louisiana, or 2006+)	27	NM: Lincoln County (35027)	Yes	CHSDA	Southwest	New Mexico	Breast	Malignant	8.4 Carcinoma of breast	Unclassified	XI(f) Other and unspecified carcinomas	Breast	Breast	C50.9-Breast, NOS	509	8530	Malignant	Unknown	Right - origin of primary	Positive histology	8530/3: Inflammatory carcinoma	8530/3: Inflammatory carcinoma	8500-8549: ductal and lobular neoplasms	Not Brain	XI(f.6) Carcinomas of breast	Female Breast	IV	IV	IV	AJCC 6th ed derived from CS manual/coding instructions, v1.0	Blank(s)	Blank(s)	N/A	T4d	N1	M1	T4d	N1	M1	Blank(s)	Blank(s)	Blank(s)	Any T, Mets	N1
40-44 years	White	Female	2011	New Mexico - 1973+	Not applicable (1973-2004, 2005 not Louisiana, or 2006+)	41	NM: Roosevelt County (35041)	Yes	Not CHSDA	Southwest	New Mexico	Breast	Malignant	8.4 Carcinoma of breast	Unclassified	XI(f) Other and unspecified carcinomas	Breast	Breast	C50.3-Lower-inner quadrant of breast	503	8530	Malignant	Poorly differentiated; Grade III	Right - origin of primary	Positive histology	8530/3: Inflammatory carcinoma	8530/3: Inflammatory carcinoma	8500-8549: ductal and lobular neoplasms	Not Brain	XI(f.6) Carcinomas of breast	Female Breast	IV	IV	IV	AJCC 6th ed derived from CS manual/coding instructions, v1.0	Blank(s)	Blank(s)	N/A	T4d	N3a	M1	T4d	N3a	M1	Blank(s)	Blank(s)	Blank(s)	Any T, Mets	N3
45-49 years	White	Female	2012	New Mexico - 1973+	Not applicable (1973-2004, 2005 not Louisiana, or 2006+)	1	NM: Bernalillo County (35001)	Yes	CHSDA	Southwest	New Mexico	Breast	Malignant	8.4 Carcinoma of breast	Unclassified	XI(f) Other and unspecified carcinomas	Breast	Breast	C50.9-Breast, NOS	509	8530	Malignant	Unknown	Right - origin of primary	Positive histology	8530/3: Inflammatory carcinoma	8530/3: Inflammatory carcinoma	8500-8549: ductal and lobular neoplasms	Not Brain	XI(f.6) Carcinomas of breast	Female Breast	IV	IV	IV	AJCC 6th ed derived from CS manual/coding instructions, v1.0	Blank(s)	Blank(s)	N/A	T4d	N0	M1	T4d	N0	M1	Blank(s)	Blank(s)	Blank(s)	Any T, Mets	N0
65-69 years	Other (American Indian/AK Native, Asian/Pacific Islander)	Female	2012	New Mexico - 1973+	Not applicable (1973-2004, 2005 not Louisiana, or 2006+)	49	NM: Santa Fe County (35049)	Yes	CHSDA	Southwest	New Mexico	Breast	Malignant	8.4 Carcinoma of breast	Unclassified	XI(f) Other and unspecified carcinomas	Breast	Breast	C50.8-Overlapping lesion of breast	508	8530	Malignant	Poorly differentiated; Grade III	Left - origin of primary	Positive histology	8530/3: Inflammatory carcinoma	8530/3: Inflammatory carcinoma	8500-8549: ductal and lobular neoplasms	Not Brain	XI(f.6) Carcinomas of breast	Female Breast	IIIB	IIIB	IIIB	AJCC 6th ed derived from CS manual/coding instructions, v1.0	Blank(s)	Blank(s)	N/A	T4d	N2a	M0	T4d	N2a	M0	Blank(s)	Blank(s)	Blank(s)	T4d	N2
50-54 years	White	Female	2012	New Mexico - 1973+	Not applicable (1973-2004, 2005 not Louisiana, or 2006+)	5	NM: Chaves County (35005)	Yes	CHSDA	Southwest	New Mexico	Breast	Malignant	8.4 Carcinoma of breast	Unclassified	XI(f) Other and unspecified carcinomas	Breast	Breast	C50.9-Breast, NOS	509	8530	Malignant	Unknown	Right - origin of primary	Positive histology	8530/3: Inflammatory carcinoma	8530/3: Inflammatory carcinoma	8500-8549: ductal and lobular neoplasms	Not Brain	XI(f.6) Carcinomas of breast	Female Breast	IIIB	IIIB	IIIB	AJCC 6th ed derived from CS manual/coding instructions, v1.0	Blank(s)	Blank(s)	N/A	T4d	N0	M0	T4d	N0	M0	Blank(s)	Blank(s)	Blank(s)	T4d	N0
55-59 years	White	Female	2012	New Mexico - 1973+	Not applicable (1973-2004, 2005 not Louisiana, or 2006+)	28	NM: Los Alamos County (35028)	Yes	CHSDA	Southwest	New Mexico	Breast	Malignant	8.4 Carcinoma of breast	Unclassified	XI(f) Other and unspecified carcinomas	Breast	Breast	C50.9-Breast, NOS	509	8530	Malignant	Poorly differentiated; Grade III	Left - origin of primary	Positive histology	8530/3: Inflammatory carcinoma	8530/3: Inflammatory carcinoma	8500-8549: ductal and lobular neoplasms	Not Brain	XI(f.6) Carcinomas of breast	Female Breast	IIIB	IIIB	IIIB	AJCC 6th ed derived from CS manual/coding instructions, v1.0	Blank(s)	Blank(s)	N/A	T4d	N1	M0	T4d	N1	M0	Blank(s)	Blank(s)	Blank(s)	T4d	N1
85+ years	White	Female	2012	New Mexico - 1973+	Not applicable (1973-2004, 2005 not Louisiana, or 2006+)	1	NM: Bernalillo County (35001)	Yes	CHSDA	Southwest	New Mexico	Breast	Malignant	8.4 Carcinoma of breast	Unclassified	XI(f) Other and unspecified carcinomas	Breast	Breast	C50.4-Upper-outer quadrant of breast	504	8530	Malignant	Moderately differentiated; Grade II	Left - origin of primary	Positive histology	8530/3: Inflammatory carcinoma	8530/3: Inflammatory carcinoma	8500-8549: ductal and lobular neoplasms	Not Brain	XI(f.6) Carcinomas of breast	Female Breast	IV	IV	IV	AJCC 6th ed derived from CS manual/coding instructions, v1.0	Blank(s)	Blank(s)	N/A	T4d	N1	M1	T4d	N1	M1	Blank(s)	Blank(s)	Blank(s)	Any T, Mets	N1
25-29 years	Other (American Indian/AK Native, Asian/Pacific Islander)	Female	2012	New Mexico - 1973+	Not applicable (1973-2004, 2005 not Louisiana, or 2006+)	45	NM: San Juan County (35045)	Yes	CHSDA	Southwest	New Mexico	Breast	Malignant	8.4 Carcinoma of breast	Unclassified	XI(f) Other and unspecified carcinomas	Breast	Breast	C50.2-Upper-inner quadrant of breast	502	8530	Malignant	Moderately differentiated; Grade II	Left - origin of primary	Positive histology	8530/3: Inflammatory carcinoma	8530/3: Inflammatory carcinoma	8500-8549: ductal and lobular neoplasms	Not Brain	XI(f.6) Carcinomas of breast	Female Breast	IIIB	IIIB	IIIB	AJCC 6th ed derived from CS manual/coding instructions, v1.0	Blank(s)	Blank(s)	N/A	T4d	N1NOS	M0	T4d	N1NOS	M0	Blank(s)	Blank(s)	Blank(s)	T4d	N1
35-39 years	White	Female	2013	New Mexico - 1973+	Not applicable (1973-2004, 2005 not Louisiana, or 2006+)	59	NM: Union County (35059)	Yes	Not CHSDA	Southwest	New Mexico	Breast	Malignant	8.4 Carcinoma of breast	Unclassified	XI(f) Other and unspecified carcinomas	Breast	Breast	C50.4-Upper-outer quadrant of breast	504	8530	Malignant	Poorly differentiated; Grade III	Left - origin of primary	Positive histology	8530/3: Inflammatory carcinoma	8530/3: Inflammatory carcinoma	8500-8549: ductal and lobular neoplasms	Not Brain	XI(f.6) Carcinomas of breast	Female Breast	IIIB	IIIB	IIIB	AJCC 6th ed derived from CS manual/coding instructions, v1.0	Blank(s)	Blank(s)	N/A	T4d	N1	M0	T4d	N1	M0	Blank(s)	Blank(s)	Blank(s)	T4d	N1
65-69 years	Black	Female	2011	New Mexico - 1973+	Not applicable (1973-2004, 2005 not Louisiana, or 2006+)	25	NM: Lea County (35025)	Yes	Not CHSDA	Southwest	New Mexico	Breast	Malignant	8.4 Carcinoma of breast	Unclassified	XI(f) Other and unspecified carcinomas	Breast	Breast	C50.9-Breast, NOS	509	8530	Malignant	Unknown	Right - origin of primary	Positive histology	8530/3: Inflammatory carcinoma	8530/3: Inflammatory carcinoma	8500-8549: ductal and lobular neoplasms	Not Brain	XI(f.6) Carcinomas of breast	Female Breast	IV	IV	IV	AJCC 6th ed derived from CS manual/coding instructions, v1.0	Blank(s)	Blank(s)	N/A	T4d	N1	M1	T4d	N1	M1	Blank(s)	Blank(s)	Blank(s)	Any T, Mets	N1
40-44 years	White	Female	2013	New Mexico - 1973+	Not applicable (1973-2004, 2005 not Louisiana, or 2006+)	1	NM: Bernalillo County (35001)	Yes	CHSDA	Southwest	New Mexico	Breast	Malignant	8.4 Carcinoma of breast	Unclassified	XI(f) Other and unspecified carcinomas	Breast	Breast	C50.9-Breast, NOS	509	8530	Malignant	Moderately differentiated; Grade II	Right - origin of primary	Positive histology	8530/3: Inflammatory carcinoma	8530/3: Inflammatory carcinoma	8500-8549: ductal and lobular neoplasms	Not Brain	XI(f.6) Carcinomas of breast	Female Breast	IIIB	IIIB	IIIB	AJCC 6th ed derived from CS manual/coding instructions, v1.0	Blank(s)	Blank(s)	N/A	T4d	N1	M0	T4d	N1	M0	Blank(s)	Blank(s)	Blank(s)	T4d	N1
55-59 years	White	Female	2013	New Mexico - 1973+	Not applicable (1973-2004, 2005 not Louisiana, or 2006+)	1	NM: Bernalillo County (35001)	Yes	CHSDA	Southwest	New Mexico	Breast	Malignant	8.4 Carcinoma of breast	Unclassified	XI(f) Other and unspecified carcinomas	Breast	Breast	C50.4-Upper-outer quadrant of breast	504	8530	Malignant	Poorly differentiated; Grade III	Right - origin of primary	Positive histology	8530/3: Inflammatory carcinoma	8530/3: Inflammatory carcinoma	8500-8549: ductal and lobular neoplasms	Not Brain	XI(f.6) Carcinomas of breast	Female Breast	IV	IV	IV	AJCC 6th ed derived from CS manual/coding instructions, v1.0	Blank(s)	Blank(s)	N/A	T4d	N1	M1	T4d	N1	M1	Blank(s)	Blank(s)	Blank(s)	Any T, Mets	N1
70-74 years	White	Female	2014	New Mexico - 1973+	Not applicable (1973-2004, 2005 not Louisiana, or 2006+)	1	NM: Bernalillo County (35001)	Yes	CHSDA	Southwest	New Mexico	Breast	Malignant	8.4 Carcinoma of breast	Unclassified	XI(f) Other and unspecified carcinomas	Breast	Breast	C50.0-Nipple	500	8530	Malignant	Poorly differentiated; Grade III	Left - origin of primary	Positive histology	8530/3: Inflammatory carcinoma	8530/3: Inflammatory carcinoma	8500-8549: ductal and lobular neoplasms	Not Brain	XI(f.6) Carcinomas of breast	Female Breast	IV	IV	IV	AJCC 6th ed derived from CS manual/coding instructions, v1.0	Blank(s)	Blank(s)	N/A	T4d	N2a	M1	T4d	N2a	M1	Blank(s)	Blank(s)	Blank(s)	Any T, Mets	N2
50-54 years	White	Female	2013	New Mexico - 1973+	Not applicable (1973-2004, 2005 not Louisiana, or 2006+)	29	NM: Luna County (35029)	Yes	Not CHSDA	Southwest	New Mexico	Breast	Malignant	8.4 Carcinoma of breast	Unclassified	XI(f) Other and unspecified carcinomas	Breast	Breast	C50.9-Breast, NOS	509	8530	Malignant	Unknown	Left - origin of primary	Positive histology	8530/3: Inflammatory carcinoma	8530/3: Inflammatory carcinoma	8500-8549: ductal and lobular neoplasms	Not Brain	XI(f.6) Carcinomas of breast	Female Breast	IV	IV	IV	AJCC 6th ed derived from CS manual/coding instructions, v1.0	Blank(s)	Blank(s)	N/A	T4d	N1	M1	T4d	N1	M1	Blank(s)	Blank(s)	Blank(s)	Any T, Mets	N1
50-54 years	White	Female	2013	New Mexico - 1973+	Not applicable (1973-2004, 2005 not Louisiana, or 2006+)	17	NM: Grant County (35017)	Yes	Not CHSDA	Southwest	New Mexico	Breast	Malignant	8.4 Carcinoma of breast	Unclassified	XI(f) Other and unspecified carcinomas	Breast	Breast	C50.9-Breast, NOS	509	8530	Malignant	Moderately differentiated; Grade II	Right - origin of primary	Positive histology	8530/3: Inflammatory carcinoma	8530/3: Inflammatory carcinoma	8500-8549: ductal and lobular neoplasms	Not Brain	XI(f.6) Carcinomas of breast	Female Breast	IV	IV	IIIC	AJCC 6th ed derived from CS manual/coding instructions, v1.0	Blank(s)	Blank(s)	N/A	T4d	N1	M1	T4d	N1	M1	Blank(s)	Blank(s)	Blank(s)	T4d	N3
30-34 years	Other (American Indian/AK Native, Asian/Pacific Islander)	Female	2013	New Mexico - 1973+	Not applicable (1973-2004, 2005 not Louisiana, or 2006+)	39	NM: Rio Arriba County (35039)	Yes	CHSDA	Southwest	New Mexico	Breast	Malignant	8.4 Carcinoma of breast	Unclassified	XI(f) Other and unspecified carcinomas	Breast	Breast	C50.4-Upper-outer quadrant of breast	504	8530	Malignant	Poorly differentiated; Grade III	Right - origin of primary	Positive histology	8530/3: Inflammatory carcinoma	8530/3: Inflammatory carcinoma	8500-8549: ductal and lobular neoplasms	Not Brain	XI(f.6) Carcinomas of breast	Female Breast	IIIB	IIIB	IIIB	AJCC 6th ed derived from CS manual/coding instructions, v1.0	Blank(s)	Blank(s)	N/A	T4d	N1mi	M0	T4d	N1mi	M0	Blank(s)	Blank(s)	Blank(s)	T4d	N1
60-64 years	White	Female	2013	New Mexico - 1973+	Not applicable (1973-2004, 2005 not Louisiana, or 2006+)	5	NM: Chaves County (35005)	Yes	CHSDA	Southwest	New Mexico	Breast	Malignant	8.4 Carcinoma of breast	Unclassified	XI(f) Other and unspecified carcinomas	Breast	Breast	C50.9-Breast, NOS	509	8530	Malignant	Unknown	Right - origin of primary	Positive histology	8530/3: Inflammatory carcinoma	8530/3: Inflammatory carcinoma	8500-8549: ductal and lobular neoplasms	Not Brain	XI(f.6) Carcinomas of breast	Female Breast	IIIB	IIIB	IIIB	AJCC 6th ed derived from CS manual/coding instructions, v1.0	Blank(s)	Blank(s)	N/A	T4d	N1a	M0	T4d	N1a	M0	Blank(s)	Blank(s)	Blank(s)	T4d	N1
70-74 years	White	Female	2015	New Mexico - 1973+	Not applicable (1973-2004, 2005 not Louisiana, or 2006+)	17	NM: Grant County (35017)	Yes	Not CHSDA	Southwest	New Mexico	Breast	Malignant	8.4 Carcinoma of breast	Unclassified	XI(f) Other and unspecified carcinomas	Breast	Breast	C50.1-Central portion of breast	501	8530	Malignant	Poorly differentiated; Grade III	Right - origin of primary	Positive histology	8530/3: Inflammatory carcinoma	8530/3: Inflammatory carcinoma	8500-8549: ductal and lobular neoplasms	Not Brain	XI(f.6) Carcinomas of breast	Female Breast	IIIB	IIIB	IIIB	AJCC 6th ed derived from CS manual/coding instructions, v1.0	Blank(s)	Blank(s)	N/A	T4d	N1	M0	T4d	N1	M0	Blank(s)	Blank(s)	Blank(s)	T4d	N1
35-39 years	White	Female	2010	New Mexico - 1973+	Not applicable (1973-2004, 2005 not Louisiana, or 2006+)	31	NM: McKinley County (35031)	Yes	CHSDA	Southwest	New Mexico	Breast	Malignant	8.4 Carcinoma of breast	Unclassified	XI(f) Other and unspecified carcinomas	Breast	Breast	C50.1-Central portion of breast	501	8530	Malignant	Moderately differentiated; Grade II	Left - origin of primary	Positive histology	8530/3: Inflammatory carcinoma	8530/3: Inflammatory carcinoma	8500-8549: ductal and lobular neoplasms	Not Brain	XI(f.6) Carcinomas of breast	Female Breast	IIIB	IIIB	IIIB	AJCC 6th ed derived from CS manual/coding instructions, v1.0	Blank(s)	Blank(s)	N/A	T4d	N2a	M0	T4d	N2a	M0	Blank(s)	Blank(s)	Blank(s)	T4d	N2
85+ years	White	Female	2014	New Mexico - 1973+	Not applicable (1973-2004, 2005 not Louisiana, or 2006+)	33	NM: Mora County (35033)	Yes	Not CHSDA	Southwest	New Mexico	Breast	Malignant	8.4 Carcinoma of breast	Unclassified	XI(f) Other and unspecified carcinomas	Breast	Breast	C50.4-Upper-outer quadrant of breast	504	8530	Malignant	Poorly differentiated; Grade III	Right - origin of primary	Positive histology	8530/3: Inflammatory carcinoma	8530/3: Inflammatory carcinoma	8500-8549: ductal and lobular neoplasms	Not Brain	XI(f.6) Carcinomas of breast	Female Breast	IIIB	IIIB	IIIB	AJCC 6th ed derived from CS manual/coding instructions, v1.0	Blank(s)	Blank(s)	N/A	T4d	N2a	M0	T4d	N2a	M0	Blank(s)	Blank(s)	Blank(s)	T4d	N2
85+ years	White	Female	2015	New Mexico - 1973+	Not applicable (1973-2004, 2005 not Louisiana, or 2006+)	1	NM: Bernalillo County (35001)	Yes	CHSDA	Southwest	New Mexico	Breast	Malignant	8.4 Carcinoma of breast	Unclassified	XI(f) Other and unspecified carcinomas	Breast	Breast	C50.8-Overlapping lesion of breast	508	8530	Malignant	Unknown	Right - origin of primary	Positive histology	8530/3: Inflammatory carcinoma	8530/3: Inflammatory carcinoma	8500-8549: ductal and lobular neoplasms	Not Brain	XI(f.6) Carcinomas of breast	Female Breast	IIIB	IIIB	IIIB	AJCC 6th ed derived from CS manual/coding instructions, v1.0	Blank(s)	Blank(s)	N/A	T4d	N2a	M0	T4d	N2a	M0	Blank(s)	Blank(s)	Blank(s)	T4d	N2
60-64 years	White	Female	2010	Seattle (Puget Sound) - 1974+	Not applicable (1973-2004, 2005 not Louisiana, or 2006+)	9	WA: Clallam County (53009)	Yes	CHSDA	Pacific Coast	Washington	Breast	Malignant	8.4 Carcinoma of breast	Unclassified	XI(f) Other and unspecified carcinomas	Breast	Breast	C50.4-Upper-outer quadrant of breast	504	8530	Malignant	Moderately differentiated; Grade II	Right - origin of primary	Positive histology	8530/3: Inflammatory carcinoma	8530/3: Inflammatory carcinoma	8500-8549: ductal and lobular neoplasms	Not Brain	XI(f.6) Carcinomas of breast	Female Breast	IV	IV	IIIC	AJCC 6th ed derived from CS manual/coding instructions, v1.0	Blank(s)	Blank(s)	N/A	T4d	NX	M1	T4d	NX	M1	Blank(s)	Blank(s)	Blank(s)	T4d	N3
65-69 years	White	Female	2011	Seattle (Puget Sound) - 1974+	Not applicable (1973-2004, 2005 not Louisiana, or 2006+)	35	WA: Kitsap County (53035)	Yes	CHSDA	Pacific Coast	Washington	Breast	Malignant	8.4 Carcinoma of breast	Unclassified	XI(f) Other and unspecified carcinomas	Breast	Breast	C50.9-Breast, NOS	509	8530	Malignant	Poorly differentiated; Grade III	Right - origin of primary	Positive histology	8530/3: Inflammatory carcinoma	8530/3: Inflammatory carcinoma	8500-8549: ductal and lobular neoplasms	Not Brain	XI(f.6) Carcinomas of breast	Female Breast	IV	IV	IIIC	AJCC 6th ed derived from CS manual/coding instructions, v1.0	Blank(s)	Blank(s)	N/A	T4d	N0	M1	T4d	N0	M1	Blank(s)	Blank(s)	Blank(s)	T4d	N3
65-69 years	White	Female	2013	Seattle (Puget Sound) - 1974+	Not applicable (1973-2004, 2005 not Louisiana, or 2006+)	33	WA: King County (53033)	Yes	CHSDA	Pacific Coast	Washington	Breast	Malignant	8.4 Carcinoma of breast	Unclassified	XI(f) Other and unspecified carcinomas	Breast	Breast	C50.9-Breast, NOS	509	8530	Malignant	Poorly differentiated; Grade III	Right - origin of primary	Positive histology	8530/3: Inflammatory carcinoma	8530/3: Inflammatory carcinoma	8500-8549: ductal and lobular neoplasms	Not Brain	XI(f.6) Carcinomas of breast	Female Breast	IV	IV	IIIC	AJCC 6th ed derived from CS manual/coding instructions, v1.0	Blank(s)	Blank(s)	N/A	T4d	N0	M1	T4d	N0	M1	Blank(s)	Blank(s)	Blank(s)	T4d	N3
70-74 years	White	Female	2015	Seattle (Puget Sound) - 1974+	Not applicable (1973-2004, 2005 not Louisiana, or 2006+)	53	WA: Pierce County (53053)	Yes	CHSDA	Pacific Coast	Washington	Breast	Malignant	8.4 Carcinoma of breast	Unclassified	XI(f) Other and unspecified carcinomas	Breast	Breast	C50.9-Breast, NOS	509	8530	Malignant	Unknown	Right - origin of primary	Positive histology	8530/3: Inflammatory carcinoma	8530/3: Inflammatory carcinoma	8500-8549: ductal and lobular neoplasms	Not Brain	XI(f.6) Carcinomas of breast	Female Breast	IV	IV	IV	AJCC 6th ed derived from CS manual/coding instructions, v1.0	Blank(s)	Blank(s)	N/A	T4d	N2a	M1	T4d	N2a	M1	Blank(s)	Blank(s)	Blank(s)	Any T, Mets	N2
60-64 years	White	Female	2010	Seattle (Puget Sound) - 1974+	Not applicable (1973-2004, 2005 not Louisiana, or 2006+)	33	WA: King County (53033)	Yes	CHSDA	Pacific Coast	Washington	Breast	Malignant	8.4 Carcinoma of breast	Unclassified	XI(f) Other and unspecified carcinomas	Breast	Breast	C50.9-Breast, NOS	509	8530	Malignant	Unknown	Left - origin of primary	Positive histology	8530/3: Inflammatory carcinoma	8530/3: Inflammatory carcinoma	8500-8549: ductal and lobular neoplasms	Not Brain	XI(f.6) Carcinomas of breast	Female Breast	IIIB	IIIB	IIIB	AJCC 6th ed derived from CS manual/coding instructions, v1.0	Blank(s)	Blank(s)	N/A	T4d	N1	M0	T4d	N1	M0	Blank(s)	Blank(s)	Blank(s)	T4d	N1
70-74 years	White	Female	2010	Seattle (Puget Sound) - 1974+	Not applicable (1973-2004, 2005 not Louisiana, or 2006+)	57	WA: Skagit County (53057)	Yes	CHSDA	Pacific Coast	Washington	Breast	Malignant	8.4 Carcinoma of breast	Unclassified	XI(f) Other and unspecified carcinomas	Breast	Breast	C50.9-Breast, NOS	509	8530	Malignant	Poorly differentiated; Grade III	Right - origin of primary	Positive histology	8530/3: Inflammatory carcinoma	8530/3: Inflammatory carcinoma	8500-8549: ductal and lobular neoplasms	Not Brain	XI(f.6) Carcinomas of breast	Female Breast	IV	IV	IV	AJCC 6th ed derived from CS manual/coding instructions, v1.0	Blank(s)	Blank(s)	N/A	T4d	N1	M1	T4d	N1	M1	Blank(s)	Blank(s)	Blank(s)	Any T, Mets	N1
30-34 years	Other (American Indian/AK Native, Asian/Pacific Islander)	Female	2010	Seattle (Puget Sound) - 1974+	Not applicable (1973-2004, 2005 not Louisiana, or 2006+)	53	WA: Pierce County (53053)	Yes	CHSDA	Pacific Coast	Washington	Breast	Malignant	8.4 Carcinoma of breast	Unclassified	XI(f) Other and unspecified carcinomas	Breast	Breast	C50.8-Overlapping lesion of breast	508	8530	Malignant	Poorly differentiated; Grade III	Right - origin of primary	Positive histology	8530/3: Inflammatory carcinoma	8530/3: Inflammatory carcinoma	8500-8549: ductal and lobular neoplasms	Not Brain	XI(f.6) Carcinomas of breast	Female Breast	IIIB	IIIB	IIIB	AJCC 6th ed derived from CS manual/coding instructions, v1.0	Blank(s)	Blank(s)	N/A	T4d	N1	M0	T4d	N1	M0	Blank(s)	Blank(s)	Blank(s)	T4d	N1
30-34 years	White	Female	2010	Seattle (Puget Sound) - 1974+	Not applicable (1973-2004, 2005 not Louisiana, or 2006+)	53	WA: Pierce County (53053)	Yes	CHSDA	Pacific Coast	Washington	Breast	Malignant	8.4 Carcinoma of breast	Unclassified	XI(f) Other and unspecified carcinomas	Breast	Breast	C50.8-Overlapping lesion of breast	508	8530	Malignant	Poorly differentiated; Grade III	Left - origin of primary	Positive histology	8530/3: Inflammatory carcinoma	8530/3: Inflammatory carcinoma	8500-8549: ductal and lobular neoplasms	Not Brain	XI(f.6) Carcinomas of breast	Female Breast	IIIB	IIIB	IIIB	AJCC 6th ed derived from CS manual/coding instructions, v1.0	Blank(s)	Blank(s)	N/A	T4d	N1	M0	T4d	N1	M0	Blank(s)	Blank(s)	Blank(s)	T4d	N1
85+ years	White	Female	2011	Seattle (Puget Sound) - 1974+	Not applicable (1973-2004, 2005 not Louisiana, or 2006+)	73	WA: Whatcom County (53073)	Yes	CHSDA	Pacific Coast	Washington	Breast	Malignant	8.4 Carcinoma of breast	Unclassified	XI(f) Other and unspecified carcinomas	Breast	Breast	C50.9-Breast, NOS	509	8530	Malignant	Poorly differentiated; Grade III	Left - origin of primary	Positive histology	8530/3: Inflammatory carcinoma	8530/3: Inflammatory carcinoma	8500-8549: ductal and lobular neoplasms	Not Brain	XI(f.6) Carcinomas of breast	Female Breast	IIINOS	UNK Stage	UNK Stage	AJCC 6th ed derived from CS manual/coding instructions, v1.0	Blank(s)	Blank(s)	N/A	T4d	NX	M0	T4d	NX	MX	Blank(s)	Blank(s)	Blank(s)	TX Adjusted	NX Adjusted
65-69 years	White	Female	2011	Seattle (Puget Sound) - 1974+	Not applicable (1973-2004, 2005 not Louisiana, or 2006+)	61	WA: Snohomish County (53061)	Yes	CHSDA	Pacific Coast	Washington	Breast	Malignant	8.4 Carcinoma of breast	Unclassified	XI(f) Other and unspecified carcinomas	Breast	Breast	C50.9-Breast, NOS	509	8530	Malignant	Poorly differentiated; Grade III	Right - origin of primary	Positive histology	8530/3: Inflammatory carcinoma	8530/3: Inflammatory carcinoma	8500-8549: ductal and lobular neoplasms	Not Brain	XI(f.6) Carcinomas of breast	Female Breast	IIIB	IIIB	IIIB	AJCC 6th ed derived from CS manual/coding instructions, v1.0	Blank(s)	Blank(s)	N/A	T4d	N2a	M0	T4d	N2a	M0	Blank(s)	Blank(s)	Blank(s)	T4d	N2
55-59 years	White	Female	2012	Seattle (Puget Sound) - 1974+	Not applicable (1973-2004, 2005 not Louisiana, or 2006+)	67	WA: Thurston County (53067)	Yes	CHSDA	Pacific Coast	Washington	Breast	Malignant	8.4 Carcinoma of breast	Unclassified	XI(f) Other and unspecified carcinomas	Breast	Breast	C50.9-Breast, NOS	509	8530	Malignant	Unknown	Right - origin of primary	Positive histology	8530/3: Inflammatory carcinoma	8530/3: Inflammatory carcinoma	8500-8549: ductal and lobular neoplasms	Not Brain	XI(f.6) Carcinomas of breast	Female Breast	IV	IV	IIIC	AJCC 6th ed derived from CS manual/coding instructions, v1.0	Blank(s)	Blank(s)	N/A	T4d	N3c	M1	T4d	N3c	M1	Blank(s)	Blank(s)	Blank(s)	T4d	N3
45-49 years	White	Female	2012	Seattle (Puget Sound) - 1974+	Not applicable (1973-2004, 2005 not Louisiana, or 2006+)	29	WA: Island County (53029)	Yes	CHSDA	Pacific Coast	Washington	Breast	Malignant	8.4 Carcinoma of breast	Unclassified	XI(f) Other and unspecified carcinomas	Breast	Breast	C50.9-Breast, NOS	509	8530	Malignant	Moderately differentiated; Grade II	Left - origin of primary	Positive histology	8530/3: Inflammatory carcinoma	8530/3: Inflammatory carcinoma	8500-8549: ductal and lobular neoplasms	Not Brain	XI(f.6) Carcinomas of breast	Female Breast	IIIB	IIIB	IIIB	AJCC 6th ed derived from CS manual/coding instructions, v1.0	Blank(s)	Blank(s)	N/A	T4d	N1a	M0	T4d	N1a	M0	Blank(s)	Blank(s)	Blank(s)	T4d	N1
80-84 years	White	Female	2013	Seattle (Puget Sound) - 1974+	Not applicable (1973-2004, 2005 not Louisiana, or 2006+)	55	WA: San Juan County (53055)	Yes	CHSDA	Pacific Coast	Washington	Breast	Malignant	8.4 Carcinoma of breast	Unclassified	XI(f) Other and unspecified carcinomas	Breast	Breast	C50.9-Breast, NOS	509	8530	Malignant	Unknown	Right - origin of primary	Positive histology	8530/3: Inflammatory carcinoma	8530/3: Inflammatory carcinoma	8500-8549: ductal and lobular neoplasms	Not Brain	XI(f.6) Carcinomas of breast	Female Breast	IIIC	IIIC	IIIC	AJCC 6th ed derived from CS manual/coding instructions, v1.0	Blank(s)	Blank(s)	N/A	T4d	N3a	M0	T4d	N3a	M0	Blank(s)	Blank(s)	Blank(s)	T4d	N3
65-69 years	White	Female	2012	Seattle (Puget Sound) - 1974+	Not applicable (1973-2004, 2005 not Louisiana, or 2006+)	35	WA: Kitsap County (53035)	Yes	CHSDA	Pacific Coast	Washington	Breast	Malignant	8.4 Carcinoma of breast	Unclassified	XI(f) Other and unspecified carcinomas	Breast	Breast	C50.8-Overlapping lesion of breast	508	8530	Malignant	Poorly differentiated; Grade III	Right - origin of primary	Positive histology	8530/3: Inflammatory carcinoma	8530/3: Inflammatory carcinoma	8500-8549: ductal and lobular neoplasms	Not Brain	XI(f.6) Carcinomas of breast	Female Breast	IIIC	IIIC	IIIC	AJCC 6th ed derived from CS manual/coding instructions, v1.0	Blank(s)	Blank(s)	N/A	T4d	N3b	M0	T4d	N3b	M0	Blank(s)	Blank(s)	Blank(s)	T4d	N3
45-49 years	White	Female	2013	Seattle (Puget Sound) - 1974+	Not applicable (1973-2004, 2005 not Louisiana, or 2006+)	35	WA: Kitsap County (53035)	Yes	CHSDA	Pacific Coast	Washington	Breast	Malignant	8.4 Carcinoma of breast	Unclassified	XI(f) Other and unspecified carcinomas	Breast	Breast	C50.9-Breast, NOS	509	8530	Malignant	Unknown	Left - origin of primary	Positive histology	8530/3: Inflammatory carcinoma	8530/3: Inflammatory carcinoma	8500-8549: ductal and lobular neoplasms	Not Brain	XI(f.6) Carcinomas of breast	Female Breast	IIIB	IIIB	IIIB	AJCC 6th ed derived from CS manual/coding instructions, v1.0	Blank(s)	Blank(s)	N/A	T4d	N1	M0	T4d	N1	M0	Blank(s)	Blank(s)	Blank(s)	T4d	N1
70-74 years	White	Female	2013	Seattle (Puget Sound) - 1974+	Not applicable (1973-2004, 2005 not Louisiana, or 2006+)	9	WA: Clallam County (53009)	Yes	CHSDA	Pacific Coast	Washington	Breast	Malignant	8.4 Carcinoma of breast	Unclassified	XI(f) Other and unspecified carcinomas	Breast	Breast	C50.9-Breast, NOS	509	8530	Malignant	Unknown	Left - origin of primary	Positive histology	8530/3: Inflammatory carcinoma	8530/3: Inflammatory carcinoma	8500-8549: ductal and lobular neoplasms	Not Brain	XI(f.6) Carcinomas of breast	Female Breast	IIIB	IIIB	IIIB	AJCC 6th ed derived from CS manual/coding instructions, v1.0	Blank(s)	Blank(s)	N/A	T4d	N1	M0	T4d	N1	M0	Blank(s)	Blank(s)	Blank(s)	T4d	N1
55-59 years	White	Female	2014	Seattle (Puget Sound) - 1974+	Not applicable (1973-2004, 2005 not Louisiana, or 2006+)	45	WA: Mason County (53045)	Yes	CHSDA	Pacific Coast	Washington	Breast	Malignant	8.4 Carcinoma of breast	Unclassified	XI(f) Other and unspecified carcinomas	Breast	Breast	C50.4-Upper-outer quadrant of breast	504	8530	Malignant	Poorly differentiated; Grade III	Right - origin of primary	Positive histology	8530/3: Inflammatory carcinoma	8530/3: Inflammatory carcinoma	8500-8549: ductal and lobular neoplasms	Not Brain	XI(f.6) Carcinomas of breast	Female Breast	IIIB	IIIB	IIIB	AJCC 6th ed derived from CS manual/coding instructions, v1.0	Blank(s)	Blank(s)	N/A	T4d	N1	M0	T4d	N1	M0	Blank(s)	Blank(s)	Blank(s)	T4d	N1
70-74 years	White	Female	2014	Seattle (Puget Sound) - 1974+	Not applicable (1973-2004, 2005 not Louisiana, or 2006+)	45	WA: Mason County (53045)	Yes	CHSDA	Pacific Coast	Washington	Breast	Malignant	8.4 Carcinoma of breast	Unclassified	XI(f) Other and unspecified carcinomas	Breast	Breast	C50.9-Breast, NOS	509	8530	Malignant	Unknown	Right - origin of primary	Positive histology	8530/3: Inflammatory carcinoma	8530/3: Inflammatory carcinoma	8500-8549: ductal and lobular neoplasms	Not Brain	XI(f.6) Carcinomas of breast	Female Breast	IIIB	IIIB	IIIB	AJCC 6th ed derived from CS manual/coding instructions, v1.0	Blank(s)	Blank(s)	N/A	T4d	N1	M0	T4d	N1	M0	Blank(s)	Blank(s)	Blank(s)	T4d	N1
75-79 years	White	Female	2014	Seattle (Puget Sound) - 1974+	Not applicable (1973-2004, 2005 not Louisiana, or 2006+)	33	WA: King County (53033)	Yes	CHSDA	Pacific Coast	Washington	Breast	Malignant	8.4 Carcinoma of breast	Unclassified	XI(f) Other and unspecified carcinomas	Breast	Breast	C50.8-Overlapping lesion of breast	508	8530	Malignant	Unknown	Right - origin of primary	Positive histology	8530/3: Inflammatory carcinoma	8530/3: Inflammatory carcinoma	8500-8549: ductal and lobular neoplasms	Not Brain	XI(f.6) Carcinomas of breast	Female Breast	IIIB	IIIB	IIIB	AJCC 6th ed derived from CS manual/coding instructions, v1.0	Blank(s)	Blank(s)	N/A	T4d	N1	M0	T4d	N1	M0	Blank(s)	Blank(s)	Blank(s)	T4d	N1
55-59 years	White	Female	2015	Seattle (Puget Sound) - 1974+	Not applicable (1973-2004, 2005 not Louisiana, or 2006+)	33	WA: King County (53033)	Yes	CHSDA	Pacific Coast	Washington	Breast	Malignant	8.4 Carcinoma of breast	Unclassified	XI(f) Other and unspecified carcinomas	Breast	Breast	C50.9-Breast, NOS	509	8530	Malignant	Moderately differentiated; Grade II	Right - origin of primary	Positive histology	8530/3: Inflammatory carcinoma	8530/3: Inflammatory carcinoma	8500-8549: ductal and lobular neoplasms	Not Brain	XI(f.6) Carcinomas of breast	Female Breast	IIIB	IIIB	IIIB	AJCC 6th ed derived from CS manual/coding instructions, v1.0	Blank(s)	Blank(s)	N/A	T4d	N1	M0	T4d	N1	M0	Blank(s)	Blank(s)	Blank(s)	T4d	N1
35-39 years	White	Female	2015	Seattle (Puget Sound) - 1974+	Not applicable (1973-2004, 2005 not Louisiana, or 2006+)	33	WA: King County (53033)	Yes	CHSDA	Pacific Coast	Washington	Breast	Malignant	8.4 Carcinoma of breast	Unclassified	XI(f) Other and unspecified carcinomas	Breast	Breast	C50.4-Upper-outer quadrant of breast	504	8530	Malignant	Poorly differentiated; Grade III	Right - origin of primary	Positive histology	8530/3: Inflammatory carcinoma	8530/3: Inflammatory carcinoma	8500-8549: ductal and lobular neoplasms	Not Brain	XI(f.6) Carcinomas of breast	Female Breast	IV	IV	IIIC	AJCC 6th ed derived from CS manual/coding instructions, v1.0	Blank(s)	Blank(s)	N/A	T4d	N1	M1	T4d	N1	M1	Blank(s)	Blank(s)	Blank(s)	T4d	N3
60-64 years	White	Female	2015	Seattle (Puget Sound) - 1974+	Not applicable (1973-2004, 2005 not Louisiana, or 2006+)	35	WA: Kitsap County (53035)	Yes	CHSDA	Pacific Coast	Washington	Breast	Malignant	8.4 Carcinoma of breast	Unclassified	XI(f) Other and unspecified carcinomas	Breast	Breast	C50.8-Overlapping lesion of breast	508	8530	Malignant	Poorly differentiated; Grade III	Right - origin of primary	Positive histology	8530/3: Inflammatory carcinoma	8530/3: Inflammatory carcinoma	8500-8549: ductal and lobular neoplasms	Not Brain	XI(f.6) Carcinomas of breast	Female Breast	IV	IV	IV	AJCC 6th ed derived from CS manual/coding instructions, v1.0	Blank(s)	Blank(s)	N/A	T4d	N3c	M1	T4d	N3c	M1	Blank(s)	Blank(s)	Blank(s)	Any T, Mets	N3
85+ years	White	Female	2015	Seattle (Puget Sound) - 1974+	Not applicable (1973-2004, 2005 not Louisiana, or 2006+)	33	WA: King County (53033)	Yes	CHSDA	Pacific Coast	Washington	Breast	Malignant	8.4 Carcinoma of breast	Unclassified	XI(f) Other and unspecified carcinomas	Breast	Breast	C50.9-Breast, NOS	509	8530	Malignant	Poorly differentiated; Grade III	Left - origin of primary	Positive histology	8530/3: Inflammatory carcinoma	8530/3: Inflammatory carcinoma	8500-8549: ductal and lobular neoplasms	Not Brain	XI(f.6) Carcinomas of breast	Female Breast	IIIB	IIIB	IIIB	AJCC 6th ed derived from CS manual/coding instructions, v1.0	Blank(s)	Blank(s)	N/A	T4d	N2a	M0	T4d	N2a	M0	Blank(s)	Blank(s)	Blank(s)	T4d	N2
45-49 years	Other (American Indian/AK Native, Asian/Pacific Islander)	Female	2015	Seattle (Puget Sound) - 1974+	Not applicable (1973-2004, 2005 not Louisiana, or 2006+)	61	WA: Snohomish County (53061)	Yes	CHSDA	Pacific Coast	Washington	Breast	Malignant	8.4 Carcinoma of breast	Unclassified	XI(f) Other and unspecified carcinomas	Breast	Breast	C50.8-Overlapping lesion of breast	508	8530	Malignant	Poorly differentiated; Grade III	Right - origin of primary	Positive histology	8530/3: Inflammatory carcinoma	8530/3: Inflammatory carcinoma	8500-8549: ductal and lobular neoplasms	Not Brain	XI(f.6) Carcinomas of breast	Female Breast	IIIB	IIIB	IIIB	AJCC 6th ed derived from CS manual/coding instructions, v1.0	Blank(s)	Blank(s)	N/A	T4d	N1	M0	T4d	N1	M0	Blank(s)	Blank(s)	Blank(s)	T4d	N1
80-84 years	Black	Female	2015	Seattle (Puget Sound) - 1974+	Not applicable (1973-2004, 2005 not Louisiana, or 2006+)	33	WA: King County (53033)	Yes	CHSDA	Pacific Coast	Washington	Breast	Malignant	8.4 Carcinoma of breast	Unclassified	XI(f) Other and unspecified carcinomas	Breast	Breast	C50.9-Breast, NOS	509	8530	Malignant	Unknown	Right - origin of primary	Positive histology	8530/3: Inflammatory carcinoma	8530/3: Inflammatory carcinoma	8500-8549: ductal and lobular neoplasms	Not Brain	XI(f.6) Carcinomas of breast	Female Breast	IIINOS	IIINOS	IIINOS	AJCC 6th ed derived from CS manual/coding instructions, v1.0	Blank(s)	Blank(s)	N/A	T4d	NX	M0	T4d	NX	M0	Blank(s)	Blank(s)	Blank(s)	T4d	NX Adjusted
50-54 years	White	Female	2015	Seattle (Puget Sound) - 1974+	Not applicable (1973-2004, 2005 not Louisiana, or 2006+)	57	WA: Skagit County (53057)	Yes	CHSDA	Pacific Coast	Washington	Breast	Malignant	8.4 Carcinoma of breast	Unclassified	XI(f) Other and unspecified carcinomas	Breast	Breast	C50.4-Upper-outer quadrant of breast	504	8530	Malignant	Poorly differentiated; Grade III	Left - origin of primary	Positive histology	8530/3: Inflammatory carcinoma	8530/3: Inflammatory carcinoma	8500-8549: ductal and lobular neoplasms	Not Brain	XI(f.6) Carcinomas of breast	Female Breast	IIIB	IIIB	IIIB	AJCC 6th ed derived from CS manual/coding instructions, v1.0	Blank(s)	Blank(s)	N/A	T4d	N2a	M0	T4d	N2a	M0	Blank(s)	Blank(s)	Blank(s)	T4d	N2
35-39 years	Black	Female	2015	Seattle (Puget Sound) - 1974+	Not applicable (1973-2004, 2005 not Louisiana, or 2006+)	61	WA: Snohomish County (53061)	Yes	CHSDA	Pacific Coast	Washington	Breast	Malignant	8.4 Carcinoma of breast	Unclassified	XI(f) Other and unspecified carcinomas	Breast	Breast	C50.4-Upper-outer quadrant of breast	504	8530	Malignant	Moderately differentiated; Grade II	Right - origin of primary	Positive histology	8530/3: Inflammatory carcinoma	8530/3: Inflammatory carcinoma	8500-8549: ductal and lobular neoplasms	Not Brain	XI(f.6) Carcinomas of breast	Female Breast	IIIC	IIIC	IIIC	AJCC 6th ed derived from CS manual/coding instructions, v1.0	Blank(s)	Blank(s)	N/A	T4d	N3a	M0	T4d	N3a	M0	Blank(s)	Blank(s)	Blank(s)	T4d	N3
40-44 years	Other (American Indian/AK Native, Asian/Pacific Islander)	Female	2015	Seattle (Puget Sound) - 1974+	Not applicable (1973-2004, 2005 not Louisiana, or 2006+)	61	WA: Snohomish County (53061)	Yes	CHSDA	Pacific Coast	Washington	Breast	Malignant	8.4 Carcinoma of breast	Unclassified	XI(f) Other and unspecified carcinomas	Breast	Breast	C50.9-Breast, NOS	509	8530	Malignant	Poorly differentiated; Grade III	Right - origin of primary	Positive histology	8530/3: Inflammatory carcinoma	8530/3: Inflammatory carcinoma	8500-8549: ductal and lobular neoplasms	Not Brain	XI(f.6) Carcinomas of breast	Female Breast	IV	IV	IV	AJCC 6th ed derived from CS manual/coding instructions, v1.0	Blank(s)	Blank(s)	N/A	T4d	N1	M1	T4d	N1	M1	Blank(s)	Blank(s)	Blank(s)	Any T, Mets	N3
75-79 years	White	Female	2010	Utah - 1973+	Not applicable (1973-2004, 2005 not Louisiana, or 2006+)	57	UT: Weber County (49057)	Yes	Not CHSDA	Southwest	Utah	Breast	Malignant	8.4 Carcinoma of breast	Unclassified	XI(f) Other and unspecified carcinomas	Breast	Breast	C50.9-Breast, NOS	509	8530	Malignant	Poorly differentiated; Grade III	Left - origin of primary	Positive histology	8530/3: Inflammatory carcinoma	8530/3: Inflammatory carcinoma	8500-8549: ductal and lobular neoplasms	Not Brain	XI(f.6) Carcinomas of breast	Female Breast	IIIB	IIIB	IIIB	AJCC 6th ed derived from CS manual/coding instructions, v1.0	Blank(s)	Blank(s)	N/A	T4d	N1a	M0	T4d	N1a	M0	Blank(s)	Blank(s)	Blank(s)	T4d	N1
75-79 years	White	Female	2015	Utah - 1973+	Not applicable (1973-2004, 2005 not Louisiana, or 2006+)	35	UT: Salt Lake County (49035)	Yes	Not CHSDA	Southwest	Utah	Breast	Malignant	8.4 Carcinoma of breast	Unclassified	XI(f) Other and unspecified carcinomas	Breast	Breast	C50.8-Overlapping lesion of breast	508	8530	Malignant	Poorly differentiated; Grade III	Right - origin of primary	Positive histology	8530/3: Inflammatory carcinoma	8530/3: Inflammatory carcinoma	8500-8549: ductal and lobular neoplasms	Not Brain	XI(f.6) Carcinomas of breast	Female Breast	IIIB	IIIB	IIIB	AJCC 6th ed derived from CS manual/coding instructions, v1.0	Blank(s)	Blank(s)	N/A	T4d	N2a	M0	T4d	N2a	M0	Blank(s)	Blank(s)	Blank(s)	T4d	N2
45-49 years	White	Female	2010	Utah - 1973+	Not applicable (1973-2004, 2005 not Louisiana, or 2006+)	49	UT: Utah County (49049)	Yes	CHSDA	Southwest	Utah	Breast	Malignant	8.4 Carcinoma of breast	Unclassified	XI(f) Other and unspecified carcinomas	Breast	Breast	C50.9-Breast, NOS	509	8530	Malignant	Moderately differentiated; Grade II	Bilateral, single primary	Positive histology	8530/3: Inflammatory carcinoma	8530/3: Inflammatory carcinoma	8500-8549: ductal and lobular neoplasms	Not Brain	XI(f.6) Carcinomas of breast	Female Breast	IIIC	UNK Stage	UNK Stage	AJCC 6th ed derived from CS manual/coding instructions, v1.0	Blank(s)	Blank(s)	N/A	T4d	N3c	M0	T4d	N3c	MX	Blank(s)	Blank(s)	Blank(s)	TX Adjusted	NX Adjusted
50-54 years	White	Female	2012	Utah - 1973+	Not applicable (1973-2004, 2005 not Louisiana, or 2006+)	47	UT: Uintah County (49047)	Yes	CHSDA	Southwest	Utah	Breast	Malignant	8.4 Carcinoma of breast	Unclassified	XI(f) Other and unspecified carcinomas	Breast	Breast	C50.4-Upper-outer quadrant of breast	504	8530	Malignant	Unknown	Right - origin of primary	Positive histology	8530/3: Inflammatory carcinoma	8530/3: Inflammatory carcinoma	8500-8549: ductal and lobular neoplasms	Not Brain	XI(f.6) Carcinomas of breast	Female Breast	IIIB	IIIB	IIIB	AJCC 6th ed derived from CS manual/coding instructions, v1.0	Blank(s)	Blank(s)	N/A	T4d	N1	M0	T4d	N1	M0	Blank(s)	Blank(s)	Blank(s)	T4d	N1
35-39 years	White	Female	2010	Utah - 1973+	Not applicable (1973-2004, 2005 not Louisiana, or 2006+)	49	UT: Utah County (49049)	Yes	CHSDA	Southwest	Utah	Breast	Malignant	8.4 Carcinoma of breast	Unclassified	XI(f) Other and unspecified carcinomas	Breast	Breast	C50.8-Overlapping lesion of breast	508	8530	Malignant	Poorly differentiated; Grade III	Left - origin of primary	Positive histology	8530/3: Inflammatory carcinoma	8530/3: Inflammatory carcinoma	8500-8549: ductal and lobular neoplasms	Not Brain	XI(f.6) Carcinomas of breast	Female Breast	IIIB	IIIB	IIIB	AJCC 6th ed derived from CS manual/coding instructions, v1.0	Blank(s)	Blank(s)	N/A	T4d	N1	M0	T4d	N1	M0	Blank(s)	Blank(s)	Blank(s)	T4d	N1
85+ years	White	Female	2010	Utah - 1973+	Not applicable (1973-2004, 2005 not Louisiana, or 2006+)	21	UT: Iron County (49021)	Yes	CHSDA	Southwest	Utah	Breast	Malignant	8.4 Carcinoma of breast	Unclassified	XI(f) Other and unspecified carcinomas	Breast	Breast	C50.9-Breast, NOS	509	8530	Malignant	Moderately differentiated; Grade II	Left - origin of primary	Positive histology	8530/3: Inflammatory carcinoma	8530/3: Inflammatory carcinoma	8500-8549: ductal and lobular neoplasms	Not Brain	XI(f.6) Carcinomas of breast	Female Breast	IIIC	IIIC	IIIC	AJCC 6th ed derived from CS manual/coding instructions, v1.0	Blank(s)	Blank(s)	N/A	T4d	N3b	M0	T4d	N3b	M0	Blank(s)	Blank(s)	Blank(s)	T4d	N3
55-59 years	White	Female	2010	Utah - 1973+	Not applicable (1973-2004, 2005 not Louisiana, or 2006+)	47	UT: Uintah County (49047)	Yes	CHSDA	Southwest	Utah	Breast	Malignant	8.4 Carcinoma of breast	Unclassified	XI(f) Other and unspecified carcinomas	Breast	Breast	C50.9-Breast, NOS	509	8530	Malignant	Poorly differentiated; Grade III	Left - origin of primary	Positive histology	8530/3: Inflammatory carcinoma	8530/3: Inflammatory carcinoma	8500-8549: ductal and lobular neoplasms	Not Brain	XI(f.6) Carcinomas of breast	Female Breast	IV	IV	IV	AJCC 6th ed derived from CS manual/coding instructions, v1.0	Blank(s)	Blank(s)	N/A	T4d	N3a	M1	T4d	N3a	M1	Blank(s)	Blank(s)	Blank(s)	Any T, Mets	N3
80-84 years	White	Female	2012	Utah - 1973+	Not applicable (1973-2004, 2005 not Louisiana, or 2006+)	11	UT: Davis County (49011)	Yes	Not CHSDA	Southwest	Utah	Breast	Malignant	8.4 Carcinoma of breast	Unclassified	XI(f) Other and unspecified carcinomas	Breast	Breast	C50.4-Upper-outer quadrant of breast	504	8530	Malignant	Moderately differentiated; Grade II	Right - origin of primary	Positive histology	8530/3: Inflammatory carcinoma	8530/3: Inflammatory carcinoma	8500-8549: ductal and lobular neoplasms	Not Brain	XI(f.6) Carcinomas of breast	Female Breast	IIIC	IIIC	IIIC	AJCC 6th ed derived from CS manual/coding instructions, v1.0	Blank(s)	Blank(s)	N/A	T4d	N3a	M0	T4d	N3a	M0	Blank(s)	Blank(s)	Blank(s)	T4d	N3
55-59 years	White	Female	2012	Utah - 1973+	Not applicable (1973-2004, 2005 not Louisiana, or 2006+)	35	UT: Salt Lake County (49035)	Yes	Not CHSDA	Southwest	Utah	Breast	Malignant	8.4 Carcinoma of breast	Unclassified	XI(f) Other and unspecified carcinomas	Breast	Breast	C50.9-Breast, NOS	509	8530	Malignant	Unknown	Right - origin of primary	Positive histology	8530/3: Inflammatory carcinoma	8530/3: Inflammatory carcinoma	8500-8549: ductal and lobular neoplasms	Not Brain	XI(f.6) Carcinomas of breast	Female Breast	IIIC	IIIC	IIIC	AJCC 6th ed derived from CS manual/coding instructions, v1.0	Blank(s)	Blank(s)	N/A	T4d	N3b	M0	T4d	N3b	M0	Blank(s)	Blank(s)	Blank(s)	T4d	N3
40-44 years	White	Female	2013	Utah - 1973+	Not applicable (1973-2004, 2005 not Louisiana, or 2006+)	35	UT: Salt Lake County (49035)	Yes	Not CHSDA	Southwest	Utah	Breast	Malignant	8.4 Carcinoma of breast	Unclassified	XI(f) Other and unspecified carcinomas	Breast	Breast	C50.1-Central portion of breast	501	8530	Malignant	Unknown	Right - origin of primary	Positive histology	8530/3: Inflammatory carcinoma	8530/3: Inflammatory carcinoma	8500-8549: ductal and lobular neoplasms	Not Brain	XI(f.6) Carcinomas of breast	Female Breast	IIIB	IIIB	IIIB	AJCC 6th ed derived from CS manual/coding instructions, v1.0	Blank(s)	Blank(s)	N/A	T4d	N0(i-)	M0	T4d	N0(i-)	M0	Blank(s)	Blank(s)	Blank(s)	T4d	N0
65-69 years	White	Female	2013	Utah - 1973+	Not applicable (1973-2004, 2005 not Louisiana, or 2006+)	49	UT: Utah County (49049)	Yes	CHSDA	Southwest	Utah	Breast	Malignant	8.4 Carcinoma of breast	Unclassified	XI(f) Other and unspecified carcinomas	Breast	Breast	C50.8-Overlapping lesion of breast	508	8530	Malignant	Well differentiated; Grade I	Left - origin of primary	Positive histology	8530/3: Inflammatory carcinoma	8530/3: Inflammatory carcinoma	8500-8549: ductal and lobular neoplasms	Not Brain	XI(f.6) Carcinomas of breast	Female Breast	IIINOS	UNK Stage	UNK Stage	AJCC 6th ed derived from CS manual/coding instructions, v1.0	Blank(s)	Blank(s)	N/A	T4d	NX	M0	T4d	NX	MX	Blank(s)	Blank(s)	Blank(s)	TX Adjusted	NX Adjusted
80-84 years	White	Female	2013	Utah - 1973+	Not applicable (1973-2004, 2005 not Louisiana, or 2006+)	11	UT: Davis County (49011)	Yes	Not CHSDA	Southwest	Utah	Breast	Malignant	8.4 Carcinoma of breast	Unclassified	XI(f) Other and unspecified carcinomas	Breast	Breast	C50.1-Central portion of breast	501	8530	Malignant	Poorly differentiated; Grade III	Right - origin of primary	Positive histology	8530/3: Inflammatory carcinoma	8530/3: Inflammatory carcinoma	8500-8549: ductal and lobular neoplasms	Not Brain	XI(f.6) Carcinomas of breast	Female Breast	IIIB	IIIB	IIIB	AJCC 6th ed derived from CS manual/coding instructions, v1.0	Blank(s)	Blank(s)	N/A	T4d	N1NOS	M0	T4d	N1NOS	M0	Blank(s)	Blank(s)	Blank(s)	T4d	N1
60-64 years	White	Female	2013	Utah - 1973+	Not applicable (1973-2004, 2005 not Louisiana, or 2006+)	35	UT: Salt Lake County (49035)	Yes	Not CHSDA	Southwest	Utah	Breast	Malignant	8.4 Carcinoma of breast	Unclassified	XI(f) Other and unspecified carcinomas	Breast	Breast	C50.8-Overlapping lesion of breast	508	8530	Malignant	Moderately differentiated; Grade II	Right - origin of primary	Positive histology	8530/3: Inflammatory carcinoma	8530/3: Inflammatory carcinoma	8500-8549: ductal and lobular neoplasms	Not Brain	XI(f.6) Carcinomas of breast	Female Breast	IIIB	IIIB	IIIB	AJCC 6th ed derived from CS manual/coding instructions, v1.0	Blank(s)	Blank(s)	N/A	T4d	N1a	M0	T4d	N1a	M0	Blank(s)	Blank(s)	Blank(s)	T4d	N1
70-74 years	White	Female	2014	Utah - 1973+	Not applicable (1973-2004, 2005 not Louisiana, or 2006+)	11	UT: Davis County (49011)	Yes	Not CHSDA	Southwest	Utah	Breast	Malignant	8.4 Carcinoma of breast	Unclassified	XI(f) Other and unspecified carcinomas	Breast	Breast	C50.9-Breast, NOS	509	8530	Malignant	Poorly differentiated; Grade III	Left - origin of primary	Positive histology	8530/3: Inflammatory carcinoma	8530/3: Inflammatory carcinoma	8500-8549: ductal and lobular neoplasms	Not Brain	XI(f.6) Carcinomas of breast	Female Breast	IIIB	IIIB	IIIB	AJCC 6th ed derived from CS manual/coding instructions, v1.0	Blank(s)	Blank(s)	N/A	T4d	N2a	M0	T4d	N2a	M0	Blank(s)	Blank(s)	Blank(s)	T4d	N2
35-39 years	White	Female	2014	Utah - 1973+	Not applicable (1973-2004, 2005 not Louisiana, or 2006+)	49	UT: Utah County (49049)	Yes	CHSDA	Southwest	Utah	Breast	Malignant	8.4 Carcinoma of breast	Unclassified	XI(f) Other and unspecified carcinomas	Breast	Breast	C50.1-Central portion of breast	501	8530	Malignant	Poorly differentiated; Grade III	Right - origin of primary	Positive histology	8530/3: Inflammatory carcinoma	8530/3: Inflammatory carcinoma	8500-8549: ductal and lobular neoplasms	Not Brain	XI(f.6) Carcinomas of breast	Female Breast	IV	IV	IV	AJCC 6th ed derived from CS manual/coding instructions, v1.0	Blank(s)	Blank(s)	N/A	T4d	N3b	M1	T4d	N3b	M1	Blank(s)	Blank(s)	Blank(s)	Any T, Mets	N3
60-64 years	White	Female	2014	Utah - 1973+	Not applicable (1973-2004, 2005 not Louisiana, or 2006+)	49	UT: Utah County (49049)	Yes	CHSDA	Southwest	Utah	Breast	Malignant	8.4 Carcinoma of breast	Unclassified	XI(f) Other and unspecified carcinomas	Breast	Breast	C50.4-Upper-outer quadrant of breast	504	8530	Malignant	Unknown	Right - origin of primary	Positive histology	8530/3: Inflammatory carcinoma	8530/3: Inflammatory carcinoma	8500-8549: ductal and lobular neoplasms	Not Brain	XI(f.6) Carcinomas of breast	Female Breast	IV	IV	IIIC	AJCC 6th ed derived from CS manual/coding instructions, v1.0	Blank(s)	Blank(s)	N/A	T4d	N2NOS	M1	T4d	N2NOS	M1	Blank(s)	Blank(s)	Blank(s)	T4d	N3
40-44 years	White	Female	2015	Utah - 1973+	Not applicable (1973-2004, 2005 not Louisiana, or 2006+)	35	UT: Salt Lake County (49035)	Yes	Not CHSDA	Southwest	Utah	Breast	Malignant	8.4 Carcinoma of breast	Unclassified	XI(f) Other and unspecified carcinomas	Breast	Breast	C50.9-Breast, NOS	509	8530	Malignant	Moderately differentiated; Grade II	Right - origin of primary	Positive histology	8530/3: Inflammatory carcinoma	8530/3: Inflammatory carcinoma	8500-8549: ductal and lobular neoplasms	Not Brain	XI(f.6) Carcinomas of breast	Female Breast	IIIB	IIIB	IIIB	AJCC 6th ed derived from CS manual/coding instructions, v1.0	Blank(s)	Blank(s)	N/A	T4d	N1a	M0	T4d	N1a	M0	Blank(s)	Blank(s)	Blank(s)	T4d	N1
50-54 years	White	Female	2015	Utah - 1973+	Not applicable (1973-2004, 2005 not Louisiana, or 2006+)	41	UT: Sevier County (49041)	Yes	CHSDA	Southwest	Utah	Breast	Malignant	8.4 Carcinoma of breast	Unclassified	XI(f) Other and unspecified carcinomas	Breast	Breast	C50.9-Breast, NOS	509	8530	Malignant	Poorly differentiated; Grade III	Left - origin of primary	Positive histology	8530/3: Inflammatory carcinoma	8530/3: Inflammatory carcinoma	8500-8549: ductal and lobular neoplasms	Not Brain	XI(f.6) Carcinomas of breast	Female Breast	IV	IV	IV	AJCC 6th ed derived from CS manual/coding instructions, v1.0	Blank(s)	Blank(s)	N/A	T4d	N3a	M1	T4d	N3a	M1	Blank(s)	Blank(s)	Blank(s)	Any T, Mets	N3
55-59 years	White	Female	2010	Atlanta (Metropolitan) - 1975+	Not applicable (1973-2004, 2005 not Louisiana, or 2006+)	63	GA: Clayton County (13063)	Yes	Not CHSDA	East	Georgia	Breast	Malignant	8.4 Carcinoma of breast	Unclassified	XI(f) Other and unspecified carcinomas	Breast	Breast	C50.4-Upper-outer quadrant of breast	504	8530	Malignant	Moderately differentiated; Grade II	Right - origin of primary	Positive histology	8530/3: Inflammatory carcinoma	8530/3: Inflammatory carcinoma	8500-8549: ductal and lobular neoplasms	Not Brain	XI(f.6) Carcinomas of breast	Female Breast	IV	IV	IV	AJCC 6th ed derived from CS manual/coding instructions, v1.0	Blank(s)	Blank(s)	N/A	T4d	NX	M1	T4d	NX	M1	Blank(s)	Blank(s)	Blank(s)	Any T, Mets	NX Adjusted
50-54 years	Black	Female	2010	Atlanta (Metropolitan) - 1975+	Not applicable (1973-2004, 2005 not Louisiana, or 2006+)	135	GA: Gwinnett County (13135)	Yes	Not CHSDA	East	Georgia	Breast	Malignant	8.4 Carcinoma of breast	Unclassified	XI(f) Other and unspecified carcinomas	Breast	Breast	C50.9-Breast, NOS	509	8530	Malignant	Moderately differentiated; Grade II	Left - origin of primary	Positive histology	8530/3: Inflammatory carcinoma	8530/3: Inflammatory carcinoma	8500-8549: ductal and lobular neoplasms	Not Brain	XI(f.6) Carcinomas of breast	Female Breast	IV	IV	IV	AJCC 6th ed derived from CS manual/coding instructions, v1.0	Blank(s)	Blank(s)	N/A	T4d	N2a	M1	T4d	N2a	M1	Blank(s)	Blank(s)	Blank(s)	Any T, Mets	N3
30-34 years	Black	Female	2010	Atlanta (Metropolitan) - 1975+	Not applicable (1973-2004, 2005 not Louisiana, or 2006+)	121	GA: Fulton County (13121)	Yes	Not CHSDA	East	Georgia	Breast	Malignant	8.4 Carcinoma of breast	Unclassified	XI(f) Other and unspecified carcinomas	Breast	Breast	C50.9-Breast, NOS	509	8530	Malignant	Moderately differentiated; Grade II	Left - origin of primary	Positive histology	8530/3: Inflammatory carcinoma	8530/3: Inflammatory carcinoma	8500-8549: ductal and lobular neoplasms	Not Brain	XI(f.6) Carcinomas of breast	Female Breast	IV	IV	IV	AJCC 6th ed derived from CS manual/coding instructions, v1.0	Blank(s)	Blank(s)	N/A	T4d	N1	M1	T4d	N1	M1	Blank(s)	Blank(s)	Blank(s)	Any T, Mets	N1
70-74 years	Other (American Indian/AK Native, Asian/Pacific Islander)	Female	2010	Atlanta (Metropolitan) - 1975+	Not applicable (1973-2004, 2005 not Louisiana, or 2006+)	67	GA: Cobb County (13067)	Yes	Not CHSDA	East	Georgia	Breast	Malignant	8.4 Carcinoma of breast	Unclassified	XI(f) Other and unspecified carcinomas	Breast	Breast	C50.1-Central portion of breast	501	8530	Malignant	Moderately differentiated; Grade II	Right - origin of primary	Positive histology	8530/3: Inflammatory carcinoma	8530/3: Inflammatory carcinoma	8500-8549: ductal and lobular neoplasms	Not Brain	XI(f.6) Carcinomas of breast	Female Breast	IV	IV	IV	AJCC 6th ed derived from CS manual/coding instructions, v1.0	Blank(s)	Blank(s)	N/A	T4d	N0	M1	T4d	N0	M1	Blank(s)	Blank(s)	Blank(s)	Any T, Mets	N0
35-39 years	White	Female	2011	Atlanta (Metropolitan) - 1975+	Not applicable (1973-2004, 2005 not Louisiana, or 2006+)	67	GA: Cobb County (13067)	Yes	Not CHSDA	East	Georgia	Breast	Malignant	8.4 Carcinoma of breast	Unclassified	XI(f) Other and unspecified carcinomas	Breast	Breast	C50.4-Upper-outer quadrant of breast	504	8530	Malignant	Poorly differentiated; Grade III	Right - origin of primary	Positive histology	8530/3: Inflammatory carcinoma	8530/3: Inflammatory carcinoma	8500-8549: ductal and lobular neoplasms	Not Brain	XI(f.6) Carcinomas of breast	Female Breast	IIIB	IIIB	IIIB	AJCC 6th ed derived from CS manual/coding instructions, v1.0	Blank(s)	Blank(s)	N/A	T4d	N2NOS	M0	T4d	N2NOS	M0	Blank(s)	Blank(s)	Blank(s)	T4d	N2
40-44 years	Black	Female	2010	Atlanta (Metropolitan) - 1975+	Not applicable (1973-2004, 2005 not Louisiana, or 2006+)	67	GA: Cobb County (13067)	Yes	Not CHSDA	East	Georgia	Breast	Malignant	8.4 Carcinoma of breast	Unclassified	XI(f) Other and unspecified carcinomas	Breast	Breast	C50.8-Overlapping lesion of breast	508	8530	Malignant	Poorly differentiated; Grade III	Left - origin of primary	Positive histology	8530/3: Inflammatory carcinoma	8530/3: Inflammatory carcinoma	8500-8549: ductal and lobular neoplasms	Not Brain	XI(f.6) Carcinomas of breast	Female Breast	IIIB	IIIB	IIIB	AJCC 6th ed derived from CS manual/coding instructions, v1.0	Blank(s)	Blank(s)	N/A	T4d	N2NOS	M0	T4d	N2NOS	M0	Blank(s)	Blank(s)	Blank(s)	T4d	N2
60-64 years	Black	Female	2011	Atlanta (Metropolitan) - 1975+	Not applicable (1973-2004, 2005 not Louisiana, or 2006+)	121	GA: Fulton County (13121)	Yes	Not CHSDA	East	Georgia	Breast	Malignant	8.4 Carcinoma of breast	Unclassified	XI(f) Other and unspecified carcinomas	Breast	Breast	C50.5-Lower-outer quadrant of breast	505	8530	Malignant	Unknown	Left - origin of primary	Positive histology	8530/3: Inflammatory carcinoma	8530/3: Inflammatory carcinoma	8500-8549: ductal and lobular neoplasms	Not Brain	XI(f.6) Carcinomas of breast	Female Breast	IIIC	IIIC	IIIC	AJCC 6th ed derived from CS manual/coding instructions, v1.0	Blank(s)	Blank(s)	N/A	T4d	N3NOS	M0	T4d	N3NOS	M0	Blank(s)	Blank(s)	Blank(s)	T4d	N3
50-54 years	White	Female	2011	Atlanta (Metropolitan) - 1975+	Not applicable (1973-2004, 2005 not Louisiana, or 2006+)	67	GA: Cobb County (13067)	Yes	Not CHSDA	East	Georgia	Breast	Malignant	8.4 Carcinoma of breast	Unclassified	XI(f) Other and unspecified carcinomas	Breast	Breast	C50.9-Breast, NOS	509	8530	Malignant	Unknown	Right - origin of primary	Positive histology	8530/3: Inflammatory carcinoma	8530/3: Inflammatory carcinoma	8500-8549: ductal and lobular neoplasms	Not Brain	XI(f.6) Carcinomas of breast	Female Breast	IIIB	IIIB	IIIB	AJCC 6th ed derived from CS manual/coding instructions, v1.0	Blank(s)	Blank(s)	N/A	T4d	N1	M0	T4d	N1	M0	Blank(s)	Blank(s)	Blank(s)	T4d	N1
30-34 years	White	Female	2012	Atlanta (Metropolitan) - 1975+	Not applicable (1973-2004, 2005 not Louisiana, or 2006+)	67	GA: Cobb County (13067)	Yes	Not CHSDA	East	Georgia	Breast	Malignant	8.4 Carcinoma of breast	Unclassified	XI(f) Other and unspecified carcinomas	Breast	Breast	C50.9-Breast, NOS	509	8530	Malignant	Poorly differentiated; Grade III	Right - origin of primary	Positive histology	8530/3: Inflammatory carcinoma	8530/3: Inflammatory carcinoma	8500-8549: ductal and lobular neoplasms	Not Brain	XI(f.6) Carcinomas of breast	Female Breast	IV	IV	IV	AJCC 6th ed derived from CS manual/coding instructions, v1.0	Blank(s)	Blank(s)	N/A	T4d	N1	M1	T4d	N1	M1	Blank(s)	Blank(s)	Blank(s)	Any T, Mets	N3
60-64 years	White	Female	2012	Atlanta (Metropolitan) - 1975+	Not applicable (1973-2004, 2005 not Louisiana, or 2006+)	135	GA: Gwinnett County (13135)	Yes	Not CHSDA	East	Georgia	Breast	Malignant	8.4 Carcinoma of breast	Unclassified	XI(f) Other and unspecified carcinomas	Breast	Breast	C50.9-Breast, NOS	509	8530	Malignant	Unknown	Left - origin of primary	Positive histology	8530/3: Inflammatory carcinoma	8530/3: Inflammatory carcinoma	8500-8549: ductal and lobular neoplasms	Not Brain	XI(f.6) Carcinomas of breast	Female Breast	IV	IV	IV	AJCC 6th ed derived from CS manual/coding instructions, v1.0	Blank(s)	Blank(s)	N/A	T4d	N0(i+)	M1	T4d	N0(i+)	M1	Blank(s)	Blank(s)	Blank(s)	Any T, Mets	N0
25-29 years	White	Female	2013	Atlanta (Metropolitan) - 1975+	Not applicable (1973-2004, 2005 not Louisiana, or 2006+)	67	GA: Cobb County (13067)	Yes	Not CHSDA	East	Georgia	Breast	Malignant	8.4 Carcinoma of breast	Unclassified	XI(f) Other and unspecified carcinomas	Breast	Breast	C50.9-Breast, NOS	509	8530	Malignant	Poorly differentiated; Grade III	Left - origin of primary	Positive histology	8530/3: Inflammatory carcinoma	8530/3: Inflammatory carcinoma	8500-8549: ductal and lobular neoplasms	Not Brain	XI(f.6) Carcinomas of breast	Female Breast	IIIB	IIIB	IIIB	AJCC 6th ed derived from CS manual/coding instructions, v1.0	Blank(s)	Blank(s)	N/A	T4d	N1	M0	T4d	N1	M0	Blank(s)	Blank(s)	Blank(s)	T4d	N1
45-49 years	Black	Female	2013	Atlanta (Metropolitan) - 1975+	Not applicable (1973-2004, 2005 not Louisiana, or 2006+)	89	GA: DeKalb County (13089)	Yes	Not CHSDA	East	Georgia	Breast	Malignant	8.4 Carcinoma of breast	Unclassified	XI(f) Other and unspecified carcinomas	Breast	Breast	C50.9-Breast, NOS	509	8530	Malignant	Poorly differentiated; Grade III	Right - origin of primary	Positive histology	8530/3: Inflammatory carcinoma	8530/3: Inflammatory carcinoma	8500-8549: ductal and lobular neoplasms	Not Brain	XI(f.6) Carcinomas of breast	Female Breast	IIIB	IIIB	IIIB	AJCC 6th ed derived from CS manual/coding instructions, v1.0	Blank(s)	Blank(s)	N/A	T4d	N2a	M0	T4d	N2a	M0	Blank(s)	Blank(s)	Blank(s)	T4d	N2
75-79 years	White	Female	2013	Atlanta (Metropolitan) - 1975+	Not applicable (1973-2004, 2005 not Louisiana, or 2006+)	67	GA: Cobb County (13067)	Yes	Not CHSDA	East	Georgia	Breast	Malignant	8.4 Carcinoma of breast	Unclassified	XI(f) Other and unspecified carcinomas	Breast	Breast	C50.8-Overlapping lesion of breast	508	8530	Malignant	Poorly differentiated; Grade III	Right - origin of primary	Positive histology	8530/3: Inflammatory carcinoma	8530/3: Inflammatory carcinoma	8500-8549: ductal and lobular neoplasms	Not Brain	XI(f.6) Carcinomas of breast	Female Breast	IV	IV	IV	AJCC 6th ed derived from CS manual/coding instructions, v1.0	Blank(s)	Blank(s)	N/A	T4d	N3b	M1	T4d	N3b	M1	Blank(s)	Blank(s)	Blank(s)	Any T, Mets	N3
75-79 years	Black	Female	2013	Atlanta (Metropolitan) - 1975+	Not applicable (1973-2004, 2005 not Louisiana, or 2006+)	89	GA: DeKalb County (13089)	Yes	Not CHSDA	East	Georgia	Breast	Malignant	8.4 Carcinoma of breast	Unclassified	XI(f) Other and unspecified carcinomas	Breast	Breast	C50.8-Overlapping lesion of breast	508	8530	Malignant	Poorly differentiated; Grade III	Left - origin of primary	Positive histology	8530/3: Inflammatory carcinoma	8530/3: Inflammatory carcinoma	8500-8549: ductal and lobular neoplasms	Not Brain	XI(f.6) Carcinomas of breast	Female Breast	IV	IV	IV	AJCC 6th ed derived from CS manual/coding instructions, v1.0	Blank(s)	Blank(s)	N/A	T4d	N3c	M1	T4d	N3c	M1	Blank(s)	Blank(s)	Blank(s)	Any T, Mets	N3
60-64 years	White	Female	2015	Atlanta (Metropolitan) - 1975+	Not applicable (1973-2004, 2005 not Louisiana, or 2006+)	121	GA: Fulton County (13121)	Yes	Not CHSDA	East	Georgia	Breast	Malignant	8.4 Carcinoma of breast	Unclassified	XI(f) Other and unspecified carcinomas	Breast	Breast	C50.9-Breast, NOS	509	8530	Malignant	Moderately differentiated; Grade II	Right - origin of primary	Positive histology	8530/3: Inflammatory carcinoma	8530/3: Inflammatory carcinoma	8500-8549: ductal and lobular neoplasms	Not Brain	XI(f.6) Carcinomas of breast	Female Breast	IIIB	IIIB	IIIB	AJCC 6th ed derived from CS manual/coding instructions, v1.0	Blank(s)	Blank(s)	N/A	T4d	N1	M0	T4d	N1	M0	Blank(s)	Blank(s)	Blank(s)	T4d	N1
85+ years	White	Female	2010	San Jose-Monterey - 1992+	Not applicable (1973-2004, 2005 not Louisiana, or 2006+)	85	CA: Santa Clara County (06085)	Yes	Not CHSDA	Pacific Coast	California	Breast	Malignant	8.4 Carcinoma of breast	Unclassified	XI(f) Other and unspecified carcinomas	Breast	Breast	C50.8-Overlapping lesion of breast	508	8530	Malignant	Undifferentiated; anaplastic; Grade IV	Left - origin of primary	Positive histology	8530/3: Inflammatory carcinoma	8530/3: Inflammatory carcinoma	8500-8549: ductal and lobular neoplasms	Not Brain	XI(f.6) Carcinomas of breast	Female Breast	IV	IV	IV	AJCC 6th ed derived from CS manual/coding instructions, v1.0	Blank(s)	Blank(s)	N/A	T4d	N2a	M1	T4d	N2a	M1	Blank(s)	Blank(s)	Blank(s)	Any T, Mets	N2
85+ years	White	Female	2011	San Jose-Monterey - 1992+	Not applicable (1973-2004, 2005 not Louisiana, or 2006+)	85	CA: Santa Clara County (06085)	Yes	Not CHSDA	Pacific Coast	California	Breast	Malignant	8.4 Carcinoma of breast	Unclassified	XI(f) Other and unspecified carcinomas	Breast	Breast	C50.8-Overlapping lesion of breast	508	8530	Malignant	Poorly differentiated; Grade III	Right - origin of primary	Positive histology	8530/3: Inflammatory carcinoma	8530/3: Inflammatory carcinoma	8500-8549: ductal and lobular neoplasms	Not Brain	XI(f.6) Carcinomas of breast	Female Breast	IV	IV	IV	AJCC 6th ed derived from CS manual/coding instructions, v1.0	Blank(s)	Blank(s)	N/A	T4d	N1a	M1	T4d	N1a	M1	Blank(s)	Blank(s)	Blank(s)	Any T, Mets	N1
80-84 years	Other (American Indian/AK Native, Asian/Pacific Islander)	Female	2010	San Jose-Monterey - 1992+	Not applicable (1973-2004, 2005 not Louisiana, or 2006+)	85	CA: Santa Clara County (06085)	Yes	Not CHSDA	Pacific Coast	California	Breast	Malignant	8.4 Carcinoma of breast	Unclassified	XI(f) Other and unspecified carcinomas	Breast	Breast	C50.9-Breast, NOS	509	8530	Malignant	Poorly differentiated; Grade III	Right - origin of primary	Positive histology	8530/3: Inflammatory carcinoma	8530/3: Inflammatory carcinoma	8500-8549: ductal and lobular neoplasms	Not Brain	XI(f.6) Carcinomas of breast	Female Breast	IV	IV	IV	AJCC 6th ed derived from CS manual/coding instructions, v1.0	Blank(s)	Blank(s)	N/A	T4d	N1	M1	T4d	N1	M1	Blank(s)	Blank(s)	Blank(s)	Any T, Mets	N3
55-59 years	Other (American Indian/AK Native, Asian/Pacific Islander)	Female	2011	San Jose-Monterey - 1992+	Not applicable (1973-2004, 2005 not Louisiana, or 2006+)	85	CA: Santa Clara County (06085)	Yes	Not CHSDA	Pacific Coast	California	Breast	Malignant	8.4 Carcinoma of breast	Unclassified	XI(f) Other and unspecified carcinomas	Breast	Breast	C50.8-Overlapping lesion of breast	508	8530	Malignant	Moderately differentiated; Grade II	Right - origin of primary	Positive histology	8530/3: Inflammatory carcinoma	8530/3: Inflammatory carcinoma	8500-8549: ductal and lobular neoplasms	Not Brain	XI(f.6) Carcinomas of breast	Female Breast	IV	IV	IV	AJCC 6th ed derived from CS manual/coding instructions, v1.0	Blank(s)	Blank(s)	N/A	T4d	NX	M1	T4d	NX	M1	Blank(s)	Blank(s)	Blank(s)	Any T, Mets	NX Adjusted
70-74 years	White	Female	2011	San Jose-Monterey - 1992+	Not applicable (1973-2004, 2005 not Louisiana, or 2006+)	85	CA: Santa Clara County (06085)	Yes	Not CHSDA	Pacific Coast	California	Breast	Malignant	8.4 Carcinoma of breast	Unclassified	XI(f) Other and unspecified carcinomas	Breast	Breast	C50.9-Breast, NOS	509	8530	Malignant	Unknown	Left - origin of primary	Positive histology	8530/3: Inflammatory carcinoma	8530/3: Inflammatory carcinoma	8500-8549: ductal and lobular neoplasms	Not Brain	XI(f.6) Carcinomas of breast	Female Breast	IV	IV	IV	AJCC 6th ed derived from CS manual/coding instructions, v1.0	Blank(s)	Blank(s)	N/A	T4d	N1a	M1	T4d	N1a	M1	Blank(s)	Blank(s)	Blank(s)	Any T, Mets	N1
55-59 years	White	Female	2011	San Jose-Monterey - 1992+	Not applicable (1973-2004, 2005 not Louisiana, or 2006+)	85	CA: Santa Clara County (06085)	Yes	Not CHSDA	Pacific Coast	California	Breast	Malignant	8.4 Carcinoma of breast	Unclassified	XI(f) Other and unspecified carcinomas	Breast	Breast	C50.6-Axillary tail of breast	506	8530	Malignant	Unknown	Left - origin of primary	Positive histology	8530/3: Inflammatory carcinoma	8530/3: Inflammatory carcinoma	8500-8549: ductal and lobular neoplasms	Not Brain	XI(f.6) Carcinomas of breast	Female Breast	IV	IV	IV	AJCC 6th ed derived from CS manual/coding instructions, v1.0	Blank(s)	Blank(s)	N/A	T4d	N1	M1	T4d	N1	M1	Blank(s)	Blank(s)	Blank(s)	Any T, Mets	N1
50-54 years	White	Female	2012	San Jose-Monterey - 1992+	Not applicable (1973-2004, 2005 not Louisiana, or 2006+)	85	CA: Santa Clara County (06085)	Yes	Not CHSDA	Pacific Coast	California	Breast	Malignant	8.4 Carcinoma of breast	Unclassified	XI(f) Other and unspecified carcinomas	Breast	Breast	C50.9-Breast, NOS	509	8530	Malignant	Moderately differentiated; Grade II	Left - origin of primary	Positive histology	8530/3: Inflammatory carcinoma	8530/3: Inflammatory carcinoma	8500-8549: ductal and lobular neoplasms	Not Brain	XI(f.6) Carcinomas of breast	Female Breast	IV	IV	IV	AJCC 6th ed derived from CS manual/coding instructions, v1.0	Blank(s)	Blank(s)	N/A	T4d	N1a	M1	T4d	N1a	M1	Blank(s)	Blank(s)	Blank(s)	Any T, Mets	N1
60-64 years	White	Female	2012	San Jose-Monterey - 1992+	Not applicable (1973-2004, 2005 not Louisiana, or 2006+)	87	CA: Santa Cruz County (06087)	Yes	Not CHSDA	Pacific Coast	California	Breast	Malignant	8.4 Carcinoma of breast	Unclassified	XI(f) Other and unspecified carcinomas	Breast	Breast	C50.9-Breast, NOS	509	8530	Malignant	Poorly differentiated; Grade III	Right - origin of primary	Positive histology	8530/3: Inflammatory carcinoma	8530/3: Inflammatory carcinoma	8500-8549: ductal and lobular neoplasms	Not Brain	XI(f.6) Carcinomas of breast	Female Breast	IV	IV	IV	AJCC 6th ed derived from CS manual/coding instructions, v1.0	Blank(s)	Blank(s)	N/A	T4d	N1	M1	T4d	N1	M1	Blank(s)	Blank(s)	Blank(s)	Any T, Mets	N1
65-69 years	White	Female	2012	San Jose-Monterey - 1992+	Not applicable (1973-2004, 2005 not Louisiana, or 2006+)	53	CA: Monterey County (06053)	Yes	Not CHSDA	Pacific Coast	California	Breast	Malignant	8.4 Carcinoma of breast	Unclassified	XI(f) Other and unspecified carcinomas	Breast	Breast	C50.4-Upper-outer quadrant of breast	504	8530	Malignant	Moderately differentiated; Grade II	Right - origin of primary	Positive histology	8530/3: Inflammatory carcinoma	8530/3: Inflammatory carcinoma	8500-8549: ductal and lobular neoplasms	Not Brain	XI(f.6) Carcinomas of breast	Female Breast	IIIC	IIIC	IIIC	AJCC 6th ed derived from CS manual/coding instructions, v1.0	Blank(s)	Blank(s)	N/A	T4d	N3b	M0	T4d	N3b	M0	Blank(s)	Blank(s)	Blank(s)	T4d	N3
25-29 years	White	Female	2012	San Jose-Monterey - 1992+	Not applicable (1973-2004, 2005 not Louisiana, or 2006+)	87	CA: Santa Cruz County (06087)	Yes	Not CHSDA	Pacific Coast	California	Breast	Malignant	8.4 Carcinoma of breast	Unclassified	XI(f) Other and unspecified carcinomas	Breast	Breast	C50.9-Breast, NOS	509	8530	Malignant	Poorly differentiated; Grade III	Right - origin of primary	Positive histology	8530/3: Inflammatory carcinoma	8530/3: Inflammatory carcinoma	8500-8549: ductal and lobular neoplasms	Not Brain	XI(f.6) Carcinomas of breast	Female Breast	IIIB	IIIB	IIIB	AJCC 6th ed derived from CS manual/coding instructions, v1.0	Blank(s)	Blank(s)	N/A	T4d	N2a	M0	T4d	N2a	M0	Blank(s)	Blank(s)	Blank(s)	T4d	N2
80-84 years	White	Female	2013	San Jose-Monterey - 1992+	Not applicable (1973-2004, 2005 not Louisiana, or 2006+)	85	CA: Santa Clara County (06085)	Yes	Not CHSDA	Pacific Coast	California	Breast	Malignant	8.4 Carcinoma of breast	Unclassified	XI(f) Other and unspecified carcinomas	Breast	Breast	C50.4-Upper-outer quadrant of breast	504	8530	Malignant	Poorly differentiated; Grade III	Left - origin of primary	Positive histology	8530/3: Inflammatory carcinoma	8530/3: Inflammatory carcinoma	8500-8549: ductal and lobular neoplasms	Not Brain	XI(f.6) Carcinomas of breast	Female Breast	IIIB	IIIB	IIIB	AJCC 6th ed derived from CS manual/coding instructions, v1.0	Blank(s)	Blank(s)	N/A	T4d	N1	M0	T4d	N1	M0	Blank(s)	Blank(s)	Blank(s)	T4d	N1
55-59 years	White	Female	2013	San Jose-Monterey - 1992+	Not applicable (1973-2004, 2005 not Louisiana, or 2006+)	53	CA: Monterey County (06053)	Yes	Not CHSDA	Pacific Coast	California	Breast	Malignant	8.4 Carcinoma of breast	Unclassified	XI(f) Other and unspecified carcinomas	Breast	Breast	C50.8-Overlapping lesion of breast	508	8530	Malignant	Moderately differentiated; Grade II	Right - origin of primary	Positive histology	8530/3: Inflammatory carcinoma	8530/3: Inflammatory carcinoma	8500-8549: ductal and lobular neoplasms	Not Brain	XI(f.6) Carcinomas of breast	Female Breast	IIIB	IIIB	IIIB	AJCC 6th ed derived from CS manual/coding instructions, v1.0	Blank(s)	Blank(s)	N/A	T4d	N2NOS	M0	T4d	N2NOS	M0	Blank(s)	Blank(s)	Blank(s)	T4d	N2
85+ years	White	Female	2013	San Jose-Monterey - 1992+	Not applicable (1973-2004, 2005 not Louisiana, or 2006+)	87	CA: Santa Cruz County (06087)	Yes	Not CHSDA	Pacific Coast	California	Breast	Malignant	8.4 Carcinoma of breast	Unclassified	XI(f) Other and unspecified carcinomas	Breast	Breast	C50.8-Overlapping lesion of breast	508	8530	Malignant	Unknown	Left - origin of primary	Positive histology	8530/3: Inflammatory carcinoma	8530/3: Inflammatory carcinoma	8500-8549: ductal and lobular neoplasms	Not Brain	XI(f.6) Carcinomas of breast	Female Breast	IIIB	IIIB	IIIB	AJCC 6th ed derived from CS manual/coding instructions, v1.0	Blank(s)	Blank(s)	N/A	T4d	N0	M0	T4d	N0	M0	Blank(s)	Blank(s)	Blank(s)	T4d	N0
70-74 years	White	Female	2013	San Jose-Monterey - 1992+	Not applicable (1973-2004, 2005 not Louisiana, or 2006+)	85	CA: Santa Clara County (06085)	Yes	Not CHSDA	Pacific Coast	California	Breast	Malignant	8.4 Carcinoma of breast	Unclassified	XI(f) Other and unspecified carcinomas	Breast	Breast	C50.9-Breast, NOS	509	8530	Malignant	Unknown	Right - origin of primary	Positive histology	8530/3: Inflammatory carcinoma	8530/3: Inflammatory carcinoma	8500-8549: ductal and lobular neoplasms	Not Brain	XI(f.6) Carcinomas of breast	Female Breast	IIIB	IIIB	IIIB	AJCC 6th ed derived from CS manual/coding instructions, v1.0	Blank(s)	Blank(s)	N/A	T4d	N1a	M0	T4d	N1a	M0	Blank(s)	Blank(s)	Blank(s)	T4d	N1
60-64 years	White	Female	2015	San Jose-Monterey - 1992+	Not applicable (1973-2004, 2005 not Louisiana, or 2006+)	85	CA: Santa Clara County (06085)	Yes	Not CHSDA	Pacific Coast	California	Breast	Malignant	8.4 Carcinoma of breast	Unclassified	XI(f) Other and unspecified carcinomas	Breast	Breast	C50.9-Breast, NOS	509	8530	Malignant	Moderately differentiated; Grade II	Left - origin of primary	Positive histology	8530/3: Inflammatory carcinoma	8530/3: Inflammatory carcinoma	8500-8549: ductal and lobular neoplasms	Not Brain	XI(f.6) Carcinomas of breast	Female Breast	IV	IV	IV	AJCC 6th ed derived from CS manual/coding instructions, v1.0	Blank(s)	Blank(s)	N/A	T4d	N2a	M1	T4d	N2a	M1	Blank(s)	Blank(s)	Blank(s)	Any T, Mets	N3
65-69 years	Other (American Indian/AK Native, Asian/Pacific Islander)	Female	2015	San Jose-Monterey - 1992+	Not applicable (1973-2004, 2005 not Louisiana, or 2006+)	85	CA: Santa Clara County (06085)	Yes	Not CHSDA	Pacific Coast	California	Breast	Malignant	8.4 Carcinoma of breast	Unclassified	XI(f) Other and unspecified carcinomas	Breast	Breast	C50.9-Breast, NOS	509	8530	Malignant	Unknown	Right - origin of primary	Positive exfoliative cytology, no positive histology	8530/3: Inflammatory carcinoma	8530/3: Inflammatory carcinoma	8500-8549: ductal and lobular neoplasms	Not Brain	XI(f.6) Carcinomas of breast	Female Breast	IV	IV	IV	AJCC 6th ed derived from CS manual/coding instructions, v1.0	Blank(s)	Blank(s)	N/A	T4d	N1	M1	T4d	N1	M1	Blank(s)	Blank(s)	Blank(s)	Any T, Mets	N1
35-39 years	White	Female	2015	San Jose-Monterey - 1992+	Not applicable (1973-2004, 2005 not Louisiana, or 2006+)	87	CA: Santa Cruz County (06087)	Yes	Not CHSDA	Pacific Coast	California	Breast	Malignant	8.4 Carcinoma of breast	Unclassified	XI(f) Other and unspecified carcinomas	Breast	Breast	C50.8-Overlapping lesion of breast	508	8530	Malignant	Poorly differentiated; Grade III	Right - origin of primary	Positive histology	8530/3: Inflammatory carcinoma	8530/3: Inflammatory carcinoma	8500-8549: ductal and lobular neoplasms	Not Brain	XI(f.6) Carcinomas of breast	Female Breast	IIIC	IIIC	IIIC	AJCC 6th ed derived from CS manual/coding instructions, v1.0	Blank(s)	Blank(s)	N/A	T4d	N3a	M0	T4d	N3a	M0	Blank(s)	Blank(s)	Blank(s)	T4d	N3
75-79 years	White	Female	2015	San Jose-Monterey - 1992+	Not applicable (1973-2004, 2005 not Louisiana, or 2006+)	85	CA: Santa Clara County (06085)	Yes	Not CHSDA	Pacific Coast	California	Breast	Malignant	8.4 Carcinoma of breast	Unclassified	XI(f) Other and unspecified carcinomas	Breast	Breast	C50.8-Overlapping lesion of breast	508	8530	Malignant	Unknown	Right - origin of primary	Positive histology	8530/3: Inflammatory carcinoma	8530/3: Inflammatory carcinoma	8500-8549: ductal and lobular neoplasms	Not Brain	XI(f.6) Carcinomas of breast	Female Breast	IIIB	IIIB	IIIB	AJCC 6th ed derived from CS manual/coding instructions, v1.0	Blank(s)	Blank(s)	N/A	T4d	N0(i+)	M0	T4d	N0(i+)	M0	Blank(s)	Blank(s)	Blank(s)	T4d	N0
80-84 years	Black	Female	2014	Los Angeles - 1992+	Not applicable (1973-2004, 2005 not Louisiana, or 2006+)	37	CA: Los Angeles Registry (06037)	Yes	Not CHSDA	Pacific Coast	California	Breast	Malignant	8.4 Carcinoma of breast	Unclassified	XI(f) Other and unspecified carcinomas	Breast	Breast	C50.4-Upper-outer quadrant of breast	504	8530	Malignant	Moderately differentiated; Grade II	Right - origin of primary	Positive histology	8530/3: Inflammatory carcinoma	8530/3: Inflammatory carcinoma	8500-8549: ductal and lobular neoplasms	Not Brain	XI(f.6) Carcinomas of breast	Female Breast	IV	IV	IV	AJCC 6th ed derived from CS manual/coding instructions, v1.0	Blank(s)	Blank(s)	N/A	T4d	N1	M1	T4d	N1	M1	Blank(s)	Blank(s)	Blank(s)	Any T, Mets	N1
50-54 years	White	Female	2010	Los Angeles - 1992+	Not applicable (1973-2004, 2005 not Louisiana, or 2006+)	37	CA: Los Angeles Registry (06037)	Yes	Not CHSDA	Pacific Coast	California	Breast	Malignant	8.4 Carcinoma of breast	Unclassified	XI(f) Other and unspecified carcinomas	Breast	Breast	C50.4-Upper-outer quadrant of breast	504	8530	Malignant	Unknown	Left - origin of primary	Positive histology	8530/3: Inflammatory carcinoma	8530/3: Inflammatory carcinoma	8500-8549: ductal and lobular neoplasms	Not Brain	XI(f.6) Carcinomas of breast	Female Breast	IIIC	IIIC	IIIC	AJCC 6th ed derived from CS manual/coding instructions, v1.0	Blank(s)	Blank(s)	N/A	T4d	N3a	M0	T4d	N3a	M0	Blank(s)	Blank(s)	Blank(s)	T4d	N3
75-79 years	White	Female	2012	Los Angeles - 1992+	Not applicable (1973-2004, 2005 not Louisiana, or 2006+)	37	CA: Los Angeles Registry (06037)	Yes	Not CHSDA	Pacific Coast	California	Breast	Malignant	8.4 Carcinoma of breast	Unclassified	XI(f) Other and unspecified carcinomas	Breast	Breast	C50.9-Breast, NOS	509	8530	Malignant	Moderately differentiated; Grade II	Right - origin of primary	Positive histology	8530/3: Inflammatory carcinoma	8530/3: Inflammatory carcinoma	8500-8549: ductal and lobular neoplasms	Not Brain	XI(f.6) Carcinomas of breast	Female Breast	IIIB	IIIB	IIIB	AJCC 6th ed derived from CS manual/coding instructions, v1.0	Blank(s)	Blank(s)	N/A	T4d	N0	M0	T4d	N0	M0	Blank(s)	Blank(s)	Blank(s)	T4d	N0
65-69 years	White	Female	2012	Los Angeles - 1992+	Not applicable (1973-2004, 2005 not Louisiana, or 2006+)	37	CA: Los Angeles Registry (06037)	Yes	Not CHSDA	Pacific Coast	California	Breast	Malignant	8.4 Carcinoma of breast	Unclassified	XI(f) Other and unspecified carcinomas	Breast	Breast	C50.9-Breast, NOS	509	8530	Malignant	Poorly differentiated; Grade III	Right - origin of primary	Positive histology	8530/3: Inflammatory carcinoma	8530/3: Inflammatory carcinoma	8500-8549: ductal and lobular neoplasms	Not Brain	XI(f.6) Carcinomas of breast	Female Breast	IIIB	IIIB	IIIB	AJCC 6th ed derived from CS manual/coding instructions, v1.0	Blank(s)	Blank(s)	N/A	T4d	N1a	M0	T4d	N1a	M0	Blank(s)	Blank(s)	Blank(s)	T4d	N1
70-74 years	Black	Female	2014	Los Angeles - 1992+	Not applicable (1973-2004, 2005 not Louisiana, or 2006+)	37	CA: Los Angeles Registry (06037)	Yes	Not CHSDA	Pacific Coast	California	Breast	Malignant	8.4 Carcinoma of breast	Unclassified	XI(f) Other and unspecified carcinomas	Breast	Breast	C50.9-Breast, NOS	509	8530	Malignant	Unknown	Left - origin of primary	Positive histology	8530/3: Inflammatory carcinoma	8530/3: Inflammatory carcinoma	8500-8549: ductal and lobular neoplasms	Not Brain	XI(f.6) Carcinomas of breast	Female Breast	IIIB	IIIB	IIIB	AJCC 6th ed derived from CS manual/coding instructions, v1.0	Blank(s)	Blank(s)	N/A	T4d	N0	M0	T4d	N0	M0	Blank(s)	Blank(s)	Blank(s)	T4d	N0
60-64 years	White	Female	2013	Los Angeles - 1992+	Not applicable (1973-2004, 2005 not Louisiana, or 2006+)	37	CA: Los Angeles Registry (06037)	Yes	Not CHSDA	Pacific Coast	California	Breast	Malignant	8.4 Carcinoma of breast	Unclassified	XI(f) Other and unspecified carcinomas	Breast	Breast	C50.8-Overlapping lesion of breast	508	8530	Malignant	Poorly differentiated; Grade III	Left - origin of primary	Positive histology	8530/3: Inflammatory carcinoma	8530/3: Inflammatory carcinoma	8500-8549: ductal and lobular neoplasms	Not Brain	XI(f.6) Carcinomas of breast	Female Breast	IIIB	IIIB	IIIB	AJCC 6th ed derived from CS manual/coding instructions, v1.0	Blank(s)	Blank(s)	N/A	T4d	N2NOS	M0	T4d	N2NOS	M0	Blank(s)	Blank(s)	Blank(s)	T4d	N2
85+ years	White	Female	2013	Los Angeles - 1992+	Not applicable (1973-2004, 2005 not Louisiana, or 2006+)	37	CA: Los Angeles Registry (06037)	Yes	Not CHSDA	Pacific Coast	California	Breast	Malignant	8.4 Carcinoma of breast	Unclassified	XI(f) Other and unspecified carcinomas	Breast	Breast	C50.9-Breast, NOS	509	8530	Malignant	Moderately differentiated; Grade II	Left - origin of primary	Positive histology	8530/3: Inflammatory carcinoma	8530/3: Inflammatory carcinoma	8500-8549: ductal and lobular neoplasms	Not Brain	XI(f.6) Carcinomas of breast	Female Breast	IV	IV	IV	AJCC 6th ed derived from CS manual/coding instructions, v1.0	Blank(s)	Blank(s)	N/A	T4d	N2a	M1	T4d	N2a	M1	Blank(s)	Blank(s)	Blank(s)	Any T, Mets	N2
80-84 years	White	Female	2012	Los Angeles - 1992+	Not applicable (1973-2004, 2005 not Louisiana, or 2006+)	37	CA: Los Angeles Registry (06037)	Yes	Not CHSDA	Pacific Coast	California	Breast	Malignant	8.4 Carcinoma of breast	Unclassified	XI(f) Other and unspecified carcinomas	Breast	Breast	C50.9-Breast, NOS	509	8530	Malignant	Poorly differentiated; Grade III	Right - origin of primary	Positive histology	8530/3: Inflammatory carcinoma	8530/3: Inflammatory carcinoma	8500-8549: ductal and lobular neoplasms	Not Brain	XI(f.6) Carcinomas of breast	Female Breast	IIIB	IIIB	IIIB	AJCC 6th ed derived from CS manual/coding instructions, v1.0	Blank(s)	Blank(s)	N/A	T4d	N0	M0	T4d	N0	M0	Blank(s)	Blank(s)	Blank(s)	T4d	N0
80-84 years	White	Female	2013	Los Angeles - 1992+	Not applicable (1973-2004, 2005 not Louisiana, or 2006+)	37	CA: Los Angeles Registry (06037)	Yes	Not CHSDA	Pacific Coast	California	Breast	Malignant	8.4 Carcinoma of breast	Unclassified	XI(f) Other and unspecified carcinomas	Breast	Breast	C50.2-Upper-inner quadrant of breast	502	8530	Malignant	Poorly differentiated; Grade III	Left - origin of primary	Positive histology	8530/3: Inflammatory carcinoma	8530/3: Inflammatory carcinoma	8500-8549: ductal and lobular neoplasms	Not Brain	XI(f.6) Carcinomas of breast	Female Breast	IV	IV	IV	AJCC 6th ed derived from CS manual/coding instructions, v1.0	Blank(s)	Blank(s)	N/A	T4d	N0	M1	T4d	N0	M1	Blank(s)	Blank(s)	Blank(s)	Any T, Mets	N3
60-64 years	Black	Female	2011	Los Angeles - 1992+	Not applicable (1973-2004, 2005 not Louisiana, or 2006+)	37	CA: Los Angeles Registry (06037)	Yes	Not CHSDA	Pacific Coast	California	Breast	Malignant	8.4 Carcinoma of breast	Unclassified	XI(f) Other and unspecified carcinomas	Breast	Breast	C50.9-Breast, NOS	509	8530	Malignant	Poorly differentiated; Grade III	Bilateral, single primary	Positive histology	8530/3: Inflammatory carcinoma	8530/3: Inflammatory carcinoma	8500-8549: ductal and lobular neoplasms	Not Brain	XI(f.6) Carcinomas of breast	Female Breast	IV	IV	IV	AJCC 6th ed derived from CS manual/coding instructions, v1.0	Blank(s)	Blank(s)	N/A	T4d	N2a	M1	T4d	N2a	M1	Blank(s)	Blank(s)	Blank(s)	Any T, Mets	N2
80-84 years	White	Female	2013	Los Angeles - 1992+	Not applicable (1973-2004, 2005 not Louisiana, or 2006+)	37	CA: Los Angeles Registry (06037)	Yes	Not CHSDA	Pacific Coast	California	Breast	Malignant	8.4 Carcinoma of breast	Unclassified	XI(f) Other and unspecified carcinomas	Breast	Breast	C50.8-Overlapping lesion of breast	508	8530	Malignant	Poorly differentiated; Grade III	Right - origin of primary	Positive histology	8530/3: Inflammatory carcinoma	8530/3: Inflammatory carcinoma	8500-8549: ductal and lobular neoplasms	Not Brain	XI(f.6) Carcinomas of breast	Female Breast	IV	IV	IV	AJCC 6th ed derived from CS manual/coding instructions, v1.0	Blank(s)	Blank(s)	N/A	T4d	N1	M1	T4d	N1	M1	Blank(s)	Blank(s)	Blank(s)	Any T, Mets	N1
50-54 years	White	Female	2010	Los Angeles - 1992+	Not applicable (1973-2004, 2005 not Louisiana, or 2006+)	37	CA: Los Angeles Registry (06037)	Yes	Not CHSDA	Pacific Coast	California	Breast	Malignant	8.4 Carcinoma of breast	Unclassified	XI(f) Other and unspecified carcinomas	Breast	Breast	C50.8-Overlapping lesion of breast	508	8530	Malignant	Poorly differentiated; Grade III	Right - origin of primary	Positive histology	8530/3: Inflammatory carcinoma	8530/3: Inflammatory carcinoma	8500-8549: ductal and lobular neoplasms	Not Brain	XI(f.6) Carcinomas of breast	Female Breast	IIIC	IIIC	IIIC	AJCC 6th ed derived from CS manual/coding instructions, v1.0	Blank(s)	Blank(s)	N/A	T4d	N3a	M0	T4d	N3a	M0	Blank(s)	Blank(s)	Blank(s)	T4d	N3
55-59 years	White	Female	2010	Los Angeles - 1992+	Not applicable (1973-2004, 2005 not Louisiana, or 2006+)	37	CA: Los Angeles Registry (06037)	Yes	Not CHSDA	Pacific Coast	California	Breast	Malignant	8.4 Carcinoma of breast	Unclassified	XI(f) Other and unspecified carcinomas	Breast	Breast	C50.9-Breast, NOS	509	8530	Malignant	Unknown	Bilateral, single primary	Positive histology	8530/3: Inflammatory carcinoma	8530/3: Inflammatory carcinoma	8500-8549: ductal and lobular neoplasms	Not Brain	XI(f.6) Carcinomas of breast	Female Breast	IV	IV	IV	AJCC 6th ed derived from CS manual/coding instructions, v1.0	Blank(s)	Blank(s)	N/A	T4d	N1	M1	T4d	N1	M1	Blank(s)	Blank(s)	Blank(s)	Any T, Mets	N3
40-44 years	White	Female	2010	Los Angeles - 1992+	Not applicable (1973-2004, 2005 not Louisiana, or 2006+)	37	CA: Los Angeles Registry (06037)	Yes	Not CHSDA	Pacific Coast	California	Breast	Malignant	8.4 Carcinoma of breast	Unclassified	XI(f) Other and unspecified carcinomas	Breast	Breast	C50.9-Breast, NOS	509	8530	Malignant	Poorly differentiated; Grade III	Left - origin of primary	Positive histology	8530/3: Inflammatory carcinoma	8530/3: Inflammatory carcinoma	8500-8549: ductal and lobular neoplasms	Not Brain	XI(f.6) Carcinomas of breast	Female Breast	IIIB	IIIB	IIIB	AJCC 6th ed derived from CS manual/coding instructions, v1.0	Blank(s)	Blank(s)	N/A	T4d	N0(i-)	M0	T4d	N0(i-)	M0	Blank(s)	Blank(s)	Blank(s)	T4d	N0
50-54 years	White	Female	2010	Los Angeles - 1992+	Not applicable (1973-2004, 2005 not Louisiana, or 2006+)	37	CA: Los Angeles Registry (06037)	Yes	Not CHSDA	Pacific Coast	California	Breast	Malignant	8.4 Carcinoma of breast	Unclassified	XI(f) Other and unspecified carcinomas	Breast	Breast	C50.8-Overlapping lesion of breast	508	8530	Malignant	Moderately differentiated; Grade II	Left - origin of primary	Positive histology	8530/3: Inflammatory carcinoma	8530/3: Inflammatory carcinoma	8500-8549: ductal and lobular neoplasms	Not Brain	XI(f.6) Carcinomas of breast	Female Breast	IIIC	IIIC	IIIC	AJCC 6th ed derived from CS manual/coding instructions, v1.0	Blank(s)	Blank(s)	N/A	T4d	N3a	M0	T4d	N3a	M0	Blank(s)	Blank(s)	Blank(s)	T4d	N3
20-24 years	White	Female	2010	Los Angeles - 1992+	Not applicable (1973-2004, 2005 not Louisiana, or 2006+)	37	CA: Los Angeles Registry (06037)	Yes	Not CHSDA	Pacific Coast	California	Breast	Malignant	8.4 Carcinoma of breast	Unclassified	XI(f) Other and unspecified carcinomas	Breast	Breast	C50.9-Breast, NOS	509	8530	Malignant	Poorly differentiated; Grade III	Left - origin of primary	Positive histology	8530/3: Inflammatory carcinoma	8530/3: Inflammatory carcinoma	8500-8549: ductal and lobular neoplasms	Not Brain	XI(f.6) Carcinomas of breast	Female Breast	IV	IV	IIIC	AJCC 6th ed derived from CS manual/coding instructions, v1.0	Blank(s)	Blank(s)	N/A	T4d	N0(i-)	M1	T4d	N0(i-)	M1	Blank(s)	Blank(s)	Blank(s)	T4d	N3
50-54 years	White	Female	2010	Los Angeles - 1992+	Not applicable (1973-2004, 2005 not Louisiana, or 2006+)	37	CA: Los Angeles Registry (06037)	Yes	Not CHSDA	Pacific Coast	California	Breast	Malignant	8.4 Carcinoma of breast	Unclassified	XI(f) Other and unspecified carcinomas	Breast	Breast	C50.9-Breast, NOS	509	8530	Malignant	Unknown	Bilateral, single primary	Positive histology	8530/3: Inflammatory carcinoma	8530/3: Inflammatory carcinoma	8500-8549: ductal and lobular neoplasms	Not Brain	XI(f.6) Carcinomas of breast	Female Breast	IV	IV	IV	AJCC 6th ed derived from CS manual/coding instructions, v1.0	Blank(s)	Blank(s)	N/A	T4d	N0	M1	T4d	N0	M1	Blank(s)	Blank(s)	Blank(s)	Any T, Mets	N0
60-64 years	White	Female	2010	Los Angeles - 1992+	Not applicable (1973-2004, 2005 not Louisiana, or 2006+)	37	CA: Los Angeles Registry (06037)	Yes	Not CHSDA	Pacific Coast	California	Breast	Malignant	8.4 Carcinoma of breast	Unclassified	XI(f) Other and unspecified carcinomas	Breast	Breast	C50.9-Breast, NOS	509	8530	Malignant	Poorly differentiated; Grade III	Right - origin of primary	Positive histology	8530/3: Inflammatory carcinoma	8530/3: Inflammatory carcinoma	8500-8549: ductal and lobular neoplasms	Not Brain	XI(f.6) Carcinomas of breast	Female Breast	IV	IV	IV	AJCC 6th ed derived from CS manual/coding instructions, v1.0	Blank(s)	Blank(s)	N/A	T4d	N2a	M1	T4d	N2a	M1	Blank(s)	Blank(s)	Blank(s)	Any T, Mets	N2
55-59 years	Black	Female	2010	Los Angeles - 1992+	Not applicable (1973-2004, 2005 not Louisiana, or 2006+)	37	CA: Los Angeles Registry (06037)	Yes	Not CHSDA	Pacific Coast	California	Breast	Malignant	8.4 Carcinoma of breast	Unclassified	XI(f) Other and unspecified carcinomas	Breast	Breast	C50.5-Lower-outer quadrant of breast	505	8530	Malignant	Moderately differentiated; Grade II	Right - origin of primary	Positive histology	8530/3: Inflammatory carcinoma	8530/3: Inflammatory carcinoma	8500-8549: ductal and lobular neoplasms	Not Brain	XI(f.6) Carcinomas of breast	Female Breast	IIIB	IIIB	IIIB	AJCC 6th ed derived from CS manual/coding instructions, v1.0	Blank(s)	Blank(s)	N/A	T4d	N1a	M0	T4d	N1a	M0	Blank(s)	Blank(s)	Blank(s)	T4d	N1
60-64 years	White	Female	2010	Los Angeles - 1992+	Not applicable (1973-2004, 2005 not Louisiana, or 2006+)	37	CA: Los Angeles Registry (06037)	Yes	Not CHSDA	Pacific Coast	California	Breast	Malignant	8.4 Carcinoma of breast	Unclassified	XI(f) Other and unspecified carcinomas	Breast	Breast	C50.8-Overlapping lesion of breast	508	8530	Malignant	Moderately differentiated; Grade II	Right - origin of primary	Positive histology	8530/3: Inflammatory carcinoma	8530/3: Inflammatory carcinoma	8500-8549: ductal and lobular neoplasms	Not Brain	XI(f.6) Carcinomas of breast	Female Breast	IV	IV	IV	AJCC 6th ed derived from CS manual/coding instructions, v1.0	Blank(s)	Blank(s)	N/A	T4d	N1	M1	T4d	N1	M1	Blank(s)	Blank(s)	Blank(s)	Any T, Mets	N1
55-59 years	White	Female	2010	Los Angeles - 1992+	Not applicable (1973-2004, 2005 not Louisiana, or 2006+)	37	CA: Los Angeles Registry (06037)	Yes	Not CHSDA	Pacific Coast	California	Breast	Malignant	8.4 Carcinoma of breast	Unclassified	XI(f) Other and unspecified carcinomas	Breast	Breast	C50.9-Breast, NOS	509	8530	Malignant	Unknown	Right - origin of primary	Positive histology	8530/3: Inflammatory carcinoma	8530/3: Inflammatory carcinoma	8500-8549: ductal and lobular neoplasms	Not Brain	XI(f.6) Carcinomas of breast	Female Breast	IIIB	IIIB	IIIB	AJCC 6th ed derived from CS manual/coding instructions, v1.0	Blank(s)	Blank(s)	N/A	T4d	N2NOS	M0	T4d	N2NOS	M0	Blank(s)	Blank(s)	Blank(s)	T4d	N2
85+ years	White	Female	2010	Los Angeles - 1992+	Not applicable (1973-2004, 2005 not Louisiana, or 2006+)	37	CA: Los Angeles Registry (06037)	Yes	Not CHSDA	Pacific Coast	California	Breast	Malignant	8.4 Carcinoma of breast	Unclassified	XI(f) Other and unspecified carcinomas	Breast	Breast	C50.9-Breast, NOS	509	8530	Malignant	Poorly differentiated; Grade III	Right - origin of primary	Positive histology	8530/3: Inflammatory carcinoma	8530/3: Inflammatory carcinoma	8500-8549: ductal and lobular neoplasms	Not Brain	XI(f.6) Carcinomas of breast	Female Breast	IIIB	IIIB	IIIB	AJCC 6th ed derived from CS manual/coding instructions, v1.0	Blank(s)	Blank(s)	N/A	T4d	N1a	M0	T4d	N1a	M0	Blank(s)	Blank(s)	Blank(s)	T4d	N1
65-69 years	White	Female	2010	Los Angeles - 1992+	Not applicable (1973-2004, 2005 not Louisiana, or 2006+)	37	CA: Los Angeles Registry (06037)	Yes	Not CHSDA	Pacific Coast	California	Breast	Malignant	8.4 Carcinoma of breast	Unclassified	XI(f) Other and unspecified carcinomas	Breast	Breast	C50.8-Overlapping lesion of breast	508	8530	Malignant	Poorly differentiated; Grade III	Left - origin of primary	Positive histology	8530/3: Inflammatory carcinoma	8530/3: Inflammatory carcinoma	8500-8549: ductal and lobular neoplasms	Not Brain	XI(f.6) Carcinomas of breast	Female Breast	IIIB	IIIB	IIIB	AJCC 6th ed derived from CS manual/coding instructions, v1.0	Blank(s)	Blank(s)	N/A	T4d	N2a	M0	T4d	N2a	M0	Blank(s)	Blank(s)	Blank(s)	T4d	N2
70-74 years	Black	Female	2011	Los Angeles - 1992+	Not applicable (1973-2004, 2005 not Louisiana, or 2006+)	37	CA: Los Angeles Registry (06037)	Yes	Not CHSDA	Pacific Coast	California	Breast	Malignant	8.4 Carcinoma of breast	Unclassified	XI(f) Other and unspecified carcinomas	Breast	Breast	C50.8-Overlapping lesion of breast	508	8530	Malignant	Moderately differentiated; Grade II	Right - origin of primary	Positive histology	8530/3: Inflammatory carcinoma	8530/3: Inflammatory carcinoma	8500-8549: ductal and lobular neoplasms	Not Brain	XI(f.6) Carcinomas of breast	Female Breast	IIIB	IIIB	IIIB	AJCC 6th ed derived from CS manual/coding instructions, v1.0	Blank(s)	Blank(s)	N/A	T4d	N1	M0	T4d	N1	M0	Blank(s)	Blank(s)	Blank(s)	T4d	N1
45-49 years	White	Female	2010	Los Angeles - 1992+	Not applicable (1973-2004, 2005 not Louisiana, or 2006+)	37	CA: Los Angeles Registry (06037)	Yes	Not CHSDA	Pacific Coast	California	Breast	Malignant	8.4 Carcinoma of breast	Unclassified	XI(f) Other and unspecified carcinomas	Breast	Breast	C50.9-Breast, NOS	509	8530	Malignant	Moderately differentiated; Grade II	Right - origin of primary	Positive histology	8530/3: Inflammatory carcinoma	8530/3: Inflammatory carcinoma	8500-8549: ductal and lobular neoplasms	Not Brain	XI(f.6) Carcinomas of breast	Female Breast	IIIB	IIIB	IIIB	AJCC 6th ed derived from CS manual/coding instructions, v1.0	Blank(s)	Blank(s)	N/A	T4d	N1NOS	M0	T4d	N1NOS	M0	Blank(s)	Blank(s)	Blank(s)	T4d	N1
75-79 years	White	Female	2010	Los Angeles - 1992+	Not applicable (1973-2004, 2005 not Louisiana, or 2006+)	37	CA: Los Angeles Registry (06037)	Yes	Not CHSDA	Pacific Coast	California	Breast	Malignant	8.4 Carcinoma of breast	Unclassified	XI(f) Other and unspecified carcinomas	Breast	Breast	C50.5-Lower-outer quadrant of breast	505	8530	Malignant	Poorly differentiated; Grade III	Right - origin of primary	Positive histology	8530/3: Inflammatory carcinoma	8530/3: Inflammatory carcinoma	8500-8549: ductal and lobular neoplasms	Not Brain	XI(f.6) Carcinomas of breast	Female Breast	IIIB	IIIB	IIIB	AJCC 6th ed derived from CS manual/coding instructions, v1.0	Blank(s)	Blank(s)	N/A	T4d	N1	M0	T4d	N1	M0	Blank(s)	Blank(s)	Blank(s)	T4d	N1
85+ years	White	Female	2010	Los Angeles - 1992+	Not applicable (1973-2004, 2005 not Louisiana, or 2006+)	37	CA: Los Angeles Registry (06037)	Yes	Not CHSDA	Pacific Coast	California	Breast	Malignant	8.4 Carcinoma of breast	Unclassified	XI(f) Other and unspecified carcinomas	Breast	Breast	C50.4-Upper-outer quadrant of breast	504	8530	Malignant	Undifferentiated; anaplastic; Grade IV	Right - origin of primary	Positive histology	8530/3: Inflammatory carcinoma	8530/3: Inflammatory carcinoma	8500-8549: ductal and lobular neoplasms	Not Brain	XI(f.6) Carcinomas of breast	Female Breast	IV	IV	IV	AJCC 6th ed derived from CS manual/coding instructions, v1.0	Blank(s)	Blank(s)	N/A	T4d	NX	M1	T4d	NX	M1	Blank(s)	Blank(s)	Blank(s)	Any T, Mets	NX Adjusted
55-59 years	White	Female	2010	Los Angeles - 1992+	Not applicable (1973-2004, 2005 not Louisiana, or 2006+)	37	CA: Los Angeles Registry (06037)	Yes	Not CHSDA	Pacific Coast	California	Breast	Malignant	8.4 Carcinoma of breast	Unclassified	XI(f) Other and unspecified carcinomas	Breast	Breast	C50.9-Breast, NOS	509	8530	Malignant	Poorly differentiated; Grade III	Right - origin of primary	Positive histology	8530/3: Inflammatory carcinoma	8530/3: Inflammatory carcinoma	8500-8549: ductal and lobular neoplasms	Not Brain	XI(f.6) Carcinomas of breast	Female Breast	IIIB	IIIB	IIIB	AJCC 6th ed derived from CS manual/coding instructions, v1.0	Blank(s)	Blank(s)	N/A	T4d	N1a	M0	T4d	N1a	M0	Blank(s)	Blank(s)	Blank(s)	T4d	N1
70-74 years	Other (American Indian/AK Native, Asian/Pacific Islander)	Female	2011	Los Angeles - 1992+	Not applicable (1973-2004, 2005 not Louisiana, or 2006+)	37	CA: Los Angeles Registry (06037)	Yes	Not CHSDA	Pacific Coast	California	Breast	Malignant	8.4 Carcinoma of breast	Unclassified	XI(f) Other and unspecified carcinomas	Breast	Breast	C50.5-Lower-outer quadrant of breast	505	8530	Malignant	Poorly differentiated; Grade III	Right - origin of primary	Positive histology	8530/3: Inflammatory carcinoma	8530/3: Inflammatory carcinoma	8500-8549: ductal and lobular neoplasms	Not Brain	XI(f.6) Carcinomas of breast	Female Breast	IIIB	IIIB	IIIB	AJCC 6th ed derived from CS manual/coding instructions, v1.0	Blank(s)	Blank(s)	N/A	T4d	N1a	M0	T4d	N1a	M0	Blank(s)	Blank(s)	Blank(s)	T4d	N1
70-74 years	White	Female	2011	Los Angeles - 1992+	Not applicable (1973-2004, 2005 not Louisiana, or 2006+)	37	CA: Los Angeles Registry (06037)	Yes	Not CHSDA	Pacific Coast	California	Breast	Malignant	8.4 Carcinoma of breast	Unclassified	XI(f) Other and unspecified carcinomas	Breast	Breast	C50.9-Breast, NOS	509	8530	Malignant	Poorly differentiated; Grade III	Left - origin of primary	Positive histology	8530/3: Inflammatory carcinoma	8530/3: Inflammatory carcinoma	8500-8549: ductal and lobular neoplasms	Not Brain	XI(f.6) Carcinomas of breast	Female Breast	IV	IV	IV	AJCC 6th ed derived from CS manual/coding instructions, v1.0	Blank(s)	Blank(s)	N/A	T4d	N1	M1	T4d	N1	M1	Blank(s)	Blank(s)	Blank(s)	Any T, Mets	N3
85+ years	White	Female	2011	Los Angeles - 1992+	Not applicable (1973-2004, 2005 not Louisiana, or 2006+)	37	CA: Los Angeles Registry (06037)	Yes	Not CHSDA	Pacific Coast	California	Breast	Malignant	8.4 Carcinoma of breast	Unclassified	XI(f) Other and unspecified carcinomas	Breast	Breast	C50.8-Overlapping lesion of breast	508	8530	Malignant	Poorly differentiated; Grade III	Right - origin of primary	Positive histology	8530/3: Inflammatory carcinoma	8530/3: Inflammatory carcinoma	8500-8549: ductal and lobular neoplasms	Not Brain	XI(f.6) Carcinomas of breast	Female Breast	IIIB	IIIB	IIIB	AJCC 6th ed derived from CS manual/coding instructions, v1.0	Blank(s)	Blank(s)	N/A	T4d	N1	M0	T4d	N1	M0	Blank(s)	Blank(s)	Blank(s)	T4d	N1
45-49 years	White	Female	2010	Los Angeles - 1992+	Not applicable (1973-2004, 2005 not Louisiana, or 2006+)	37	CA: Los Angeles Registry (06037)	Yes	Not CHSDA	Pacific Coast	California	Breast	Malignant	8.4 Carcinoma of breast	Unclassified	XI(f) Other and unspecified carcinomas	Breast	Breast	C50.9-Breast, NOS	509	8530	Malignant	Moderately differentiated; Grade II	Right - origin of primary	Positive histology	8530/3: Inflammatory carcinoma	8530/3: Inflammatory carcinoma	8500-8549: ductal and lobular neoplasms	Not Brain	XI(f.6) Carcinomas of breast	Female Breast	IV	IV	IIIC	AJCC 6th ed derived from CS manual/coding instructions, v1.0	Blank(s)	Blank(s)	N/A	T4d	N3c	M1	T4d	N3c	M1	Blank(s)	Blank(s)	Blank(s)	T4d	N3
75-79 years	Other (American Indian/AK Native, Asian/Pacific Islander)	Female	2011	Los Angeles - 1992+	Not applicable (1973-2004, 2005 not Louisiana, or 2006+)	37	CA: Los Angeles Registry (06037)	Yes	Not CHSDA	Pacific Coast	California	Breast	Malignant	8.4 Carcinoma of breast	Unclassified	XI(f) Other and unspecified carcinomas	Breast	Breast	C50.8-Overlapping lesion of breast	508	8530	Malignant	Poorly differentiated; Grade III	Left - origin of primary	Positive histology	8530/3: Inflammatory carcinoma	8530/3: Inflammatory carcinoma	8500-8549: ductal and lobular neoplasms	Not Brain	XI(f.6) Carcinomas of breast	Female Breast	IIIB	IIIB	IIIB	AJCC 6th ed derived from CS manual/coding instructions, v1.0	Blank(s)	Blank(s)	N/A	T4d	N1mi	M0	T4d	N1mi	M0	Blank(s)	Blank(s)	Blank(s)	T4d	N1
55-59 years	White	Female	2011	Los Angeles - 1992+	Not applicable (1973-2004, 2005 not Louisiana, or 2006+)	37	CA: Los Angeles Registry (06037)	Yes	Not CHSDA	Pacific Coast	California	Breast	Malignant	8.4 Carcinoma of breast	Unclassified	XI(f) Other and unspecified carcinomas	Breast	Breast	C50.1-Central portion of breast	501	8530	Malignant	Poorly differentiated; Grade III	Left - origin of primary	Positive histology	8530/3: Inflammatory carcinoma	8530/3: Inflammatory carcinoma	8500-8549: ductal and lobular neoplasms	Not Brain	XI(f.6) Carcinomas of breast	Female Breast	IIIB	IIIB	IIIB	AJCC 6th ed derived from CS manual/coding instructions, v1.0	Blank(s)	Blank(s)	N/A	T4d	N1mi	M0	T4d	N1mi	M0	Blank(s)	Blank(s)	Blank(s)	T4d	N1
60-64 years	White	Female	2011	Los Angeles - 1992+	Not applicable (1973-2004, 2005 not Louisiana, or 2006+)	37	CA: Los Angeles Registry (06037)	Yes	Not CHSDA	Pacific Coast	California	Breast	Malignant	8.4 Carcinoma of breast	Unclassified	XI(f) Other and unspecified carcinomas	Breast	Breast	C50.9-Breast, NOS	509	8530	Malignant	Moderately differentiated; Grade II	Left - origin of primary	Positive histology	8530/3: Inflammatory carcinoma	8530/3: Inflammatory carcinoma	8500-8549: ductal and lobular neoplasms	Not Brain	XI(f.6) Carcinomas of breast	Female Breast	IV	IV	IV	AJCC 6th ed derived from CS manual/coding instructions, v1.0	Blank(s)	Blank(s)	N/A	T4d	N3a	M1	T4d	N3a	M1	Blank(s)	Blank(s)	Blank(s)	Any T, Mets	N3
70-74 years	Other (American Indian/AK Native, Asian/Pacific Islander)	Female	2013	Los Angeles - 1992+	Not applicable (1973-2004, 2005 not Louisiana, or 2006+)	37	CA: Los Angeles Registry (06037)	Yes	Not CHSDA	Pacific Coast	California	Breast	Malignant	8.4 Carcinoma of breast	Unclassified	XI(f) Other and unspecified carcinomas	Breast	Breast	C50.9-Breast, NOS	509	8530	Malignant	Unknown	Right - origin of primary	Positive histology	8530/3: Inflammatory carcinoma	8530/3: Inflammatory carcinoma	8500-8549: ductal and lobular neoplasms	Not Brain	XI(f.6) Carcinomas of breast	Female Breast	IIINOS	IIINOS	IIINOS	AJCC 6th ed derived from CS manual/coding instructions, v1.0	Blank(s)	Blank(s)	N/A	T4d	NX	M0	T4d	NX	M0	Blank(s)	Blank(s)	Blank(s)	T4d	NX Adjusted
70-74 years	White	Female	2011	Los Angeles - 1992+	Not applicable (1973-2004, 2005 not Louisiana, or 2006+)	37	CA: Los Angeles Registry (06037)	Yes	Not CHSDA	Pacific Coast	California	Breast	Malignant	8.4 Carcinoma of breast	Unclassified	XI(f) Other and unspecified carcinomas	Breast	Breast	C50.9-Breast, NOS	509	8530	Malignant	Poorly differentiated; Grade III	Left - origin of primary	Positive histology	8530/3: Inflammatory carcinoma	8530/3: Inflammatory carcinoma	8500-8549: ductal and lobular neoplasms	Not Brain	XI(f.6) Carcinomas of breast	Female Breast	IV	IV	IV	AJCC 6th ed derived from CS manual/coding instructions, v1.0	Blank(s)	Blank(s)	N/A	T4d	NX	M1	T4d	NX	M1	Blank(s)	Blank(s)	Blank(s)	Any T, Mets	NX Adjusted
40-44 years	White	Female	2011	Los Angeles - 1992+	Not applicable (1973-2004, 2005 not Louisiana, or 2006+)	37	CA: Los Angeles Registry (06037)	Yes	Not CHSDA	Pacific Coast	California	Breast	Malignant	8.4 Carcinoma of breast	Unclassified	XI(f) Other and unspecified carcinomas	Breast	Breast	C50.8-Overlapping lesion of breast	508	8530	Malignant	Poorly differentiated; Grade III	Left - origin of primary	Positive histology	8530/3: Inflammatory carcinoma	8530/3: Inflammatory carcinoma	8500-8549: ductal and lobular neoplasms	Not Brain	XI(f.6) Carcinomas of breast	Female Breast	IIIB	IIIB	IIIB	AJCC 6th ed derived from CS manual/coding instructions, v1.0	Blank(s)	Blank(s)	N/A	T4d	N0	M0	T4d	N0	M0	Blank(s)	Blank(s)	Blank(s)	T4d	N0
50-54 years	Other (American Indian/AK Native, Asian/Pacific Islander)	Female	2010	Los Angeles - 1992+	Not applicable (1973-2004, 2005 not Louisiana, or 2006+)	37	CA: Los Angeles Registry (06037)	Yes	Not CHSDA	Pacific Coast	California	Breast	Malignant	8.4 Carcinoma of breast	Unclassified	XI(f) Other and unspecified carcinomas	Breast	Breast	C50.9-Breast, NOS	509	8530	Malignant	Poorly differentiated; Grade III	Right - origin of primary	Positive histology	8530/3: Inflammatory carcinoma	8530/3: Inflammatory carcinoma	8500-8549: ductal and lobular neoplasms	Not Brain	XI(f.6) Carcinomas of breast	Female Breast	IIIC	IIIC	IIIC	AJCC 6th ed derived from CS manual/coding instructions, v1.0	Blank(s)	Blank(s)	N/A	T4d	N3c	M0	T4d	N3c	M0	Blank(s)	Blank(s)	Blank(s)	T4d	N3
40-44 years	White	Female	2010	Los Angeles - 1992+	Not applicable (1973-2004, 2005 not Louisiana, or 2006+)	37	CA: Los Angeles Registry (06037)	Yes	Not CHSDA	Pacific Coast	California	Breast	Malignant	8.4 Carcinoma of breast	Unclassified	XI(f) Other and unspecified carcinomas	Breast	Breast	C50.4-Upper-outer quadrant of breast	504	8530	Malignant	Moderately differentiated; Grade II	Right - origin of primary	Positive histology	8530/3: Inflammatory carcinoma	8530/3: Inflammatory carcinoma	8500-8549: ductal and lobular neoplasms	Not Brain	XI(f.6) Carcinomas of breast	Female Breast	IV	IV	IV	AJCC 6th ed derived from CS manual/coding instructions, v1.0	Blank(s)	Blank(s)	N/A	T4d	N2a	M1	T4d	N2a	M1	Blank(s)	Blank(s)	Blank(s)	Any T, Mets	N2
60-64 years	White	Female	2011	Los Angeles - 1992+	Not applicable (1973-2004, 2005 not Louisiana, or 2006+)	37	CA: Los Angeles Registry (06037)	Yes	Not CHSDA	Pacific Coast	California	Breast	Malignant	8.4 Carcinoma of breast	Unclassified	XI(f) Other and unspecified carcinomas	Breast	Breast	C50.1-Central portion of breast	501	8530	Malignant	Moderately differentiated; Grade II	Left - origin of primary	Positive histology	8530/3: Inflammatory carcinoma	8530/3: Inflammatory carcinoma	8500-8549: ductal and lobular neoplasms	Not Brain	XI(f.6) Carcinomas of breast	Female Breast	IIIC	IIIC	IIIC	AJCC 6th ed derived from CS manual/coding instructions, v1.0	Blank(s)	Blank(s)	N/A	T4d	N3c	M0	T4d	N3c	M0	Blank(s)	Blank(s)	Blank(s)	T4d	N3
85+ years	White	Female	2011	Los Angeles - 1992+	Not applicable (1973-2004, 2005 not Louisiana, or 2006+)	37	CA: Los Angeles Registry (06037)	Yes	Not CHSDA	Pacific Coast	California	Breast	Malignant	8.4 Carcinoma of breast	Unclassified	XI(f) Other and unspecified carcinomas	Breast	Breast	C50.8-Overlapping lesion of breast	508	8530	Malignant	Poorly differentiated; Grade III	Left - origin of primary	Positive histology	8530/3: Inflammatory carcinoma	8530/3: Inflammatory carcinoma	8500-8549: ductal and lobular neoplasms	Not Brain	XI(f.6) Carcinomas of breast	Female Breast	IV	IV	IV	AJCC 6th ed derived from CS manual/coding instructions, v1.0	Blank(s)	Blank(s)	N/A	T4d	N3b	M1	T4d	N3b	M1	Blank(s)	Blank(s)	Blank(s)	Any T, Mets	N3
50-54 years	Black	Female	2011	Los Angeles - 1992+	Not applicable (1973-2004, 2005 not Louisiana, or 2006+)	37	CA: Los Angeles Registry (06037)	Yes	Not CHSDA	Pacific Coast	California	Breast	Malignant	8.4 Carcinoma of breast	Unclassified	XI(f) Other and unspecified carcinomas	Breast	Breast	C50.8-Overlapping lesion of breast	508	8530	Malignant	Unknown	Left - origin of primary	Positive histology	8530/3: Inflammatory carcinoma	8530/3: Inflammatory carcinoma	8500-8549: ductal and lobular neoplasms	Not Brain	XI(f.6) Carcinomas of breast	Female Breast	IV	IV	IV	AJCC 6th ed derived from CS manual/coding instructions, v1.0	Blank(s)	Blank(s)	N/A	T4d	N1	M1	T4d	N1	M1	Blank(s)	Blank(s)	Blank(s)	Any T, Mets	N1
60-64 years	White	Female	2010	Los Angeles - 1992+	Not applicable (1973-2004, 2005 not Louisiana, or 2006+)	37	CA: Los Angeles Registry (06037)	Yes	Not CHSDA	Pacific Coast	California	Breast	Malignant	8.4 Carcinoma of breast	Unclassified	XI(f) Other and unspecified carcinomas	Breast	Breast	C50.4-Upper-outer quadrant of breast	504	8530	Malignant	Unknown	Left - origin of primary	Positive histology	8530/3: Inflammatory carcinoma	8530/3: Inflammatory carcinoma	8500-8549: ductal and lobular neoplasms	Not Brain	XI(f.6) Carcinomas of breast	Female Breast	IV	IV	IV	AJCC 6th ed derived from CS manual/coding instructions, v1.0	Blank(s)	Blank(s)	N/A	T4d	N3NOS	M1	T4d	N3NOS	M1	Blank(s)	Blank(s)	Blank(s)	Any T, Mets	N3
75-79 years	White	Female	2011	Los Angeles - 1992+	Not applicable (1973-2004, 2005 not Louisiana, or 2006+)	37	CA: Los Angeles Registry (06037)	Yes	Not CHSDA	Pacific Coast	California	Breast	Malignant	8.4 Carcinoma of breast	Unclassified	XI(f) Other and unspecified carcinomas	Breast	Breast	C50.4-Upper-outer quadrant of breast	504	8530	Malignant	Unknown	Right - origin of primary	Positive histology	8530/3: Inflammatory carcinoma	8530/3: Inflammatory carcinoma	8500-8549: ductal and lobular neoplasms	Not Brain	XI(f.6) Carcinomas of breast	Female Breast	IIIC	IIIC	IIIC	AJCC 6th ed derived from CS manual/coding instructions, v1.0	Blank(s)	Blank(s)	N/A	T4d	N3a	M0	T4d	N3a	M0	Blank(s)	Blank(s)	Blank(s)	T4d	N3
50-54 years	White	Female	2011	Los Angeles - 1992+	Not applicable (1973-2004, 2005 not Louisiana, or 2006+)	37	CA: Los Angeles Registry (06037)	Yes	Not CHSDA	Pacific Coast	California	Breast	Malignant	8.4 Carcinoma of breast	Unclassified	XI(f) Other and unspecified carcinomas	Breast	Breast	C50.4-Upper-outer quadrant of breast	504	8530	Malignant	Poorly differentiated; Grade III	Left - origin of primary	Positive histology	8530/3: Inflammatory carcinoma	8530/3: Inflammatory carcinoma	8500-8549: ductal and lobular neoplasms	Not Brain	XI(f.6) Carcinomas of breast	Female Breast	IIIB	IIIB	IIIB	AJCC 6th ed derived from CS manual/coding instructions, v1.0	Blank(s)	Blank(s)	N/A	T4d	N1	M0	T4d	N1	M0	Blank(s)	Blank(s)	Blank(s)	T4d	N1
50-54 years	White	Female	2012	Los Angeles - 1992+	Not applicable (1973-2004, 2005 not Louisiana, or 2006+)	37	CA: Los Angeles Registry (06037)	Yes	Not CHSDA	Pacific Coast	California	Breast	Malignant	8.4 Carcinoma of breast	Unclassified	XI(f) Other and unspecified carcinomas	Breast	Breast	C50.9-Breast, NOS	509	8530	Malignant	Poorly differentiated; Grade III	Left - origin of primary	Positive histology	8530/3: Inflammatory carcinoma	8530/3: Inflammatory carcinoma	8500-8549: ductal and lobular neoplasms	Not Brain	XI(f.6) Carcinomas of breast	Female Breast	IV	IV	IIIC	AJCC 6th ed derived from CS manual/coding instructions, v1.0	Blank(s)	Blank(s)	N/A	T4d	N1	M1	T4d	N1	M1	Blank(s)	Blank(s)	Blank(s)	T4d	N3
50-54 years	White	Female	2011	Los Angeles - 1992+	Not applicable (1973-2004, 2005 not Louisiana, or 2006+)	37	CA: Los Angeles Registry (06037)	Yes	Not CHSDA	Pacific Coast	California	Breast	Malignant	8.4 Carcinoma of breast	Unclassified	XI(f) Other and unspecified carcinomas	Breast	Breast	C50.9-Breast, NOS	509	8530	Malignant	Poorly differentiated; Grade III	Right - origin of primary	Positive histology	8530/3: Inflammatory carcinoma	8530/3: Inflammatory carcinoma	8500-8549: ductal and lobular neoplasms	Not Brain	XI(f.6) Carcinomas of breast	Female Breast	IIIB	IIIB	IIIB	AJCC 6th ed derived from CS manual/coding instructions, v1.0	Blank(s)	Blank(s)	N/A	T4d	N2NOS	M0	T4d	N2NOS	M0	Blank(s)	Blank(s)	Blank(s)	T4d	N2
75-79 years	White	Female	2011	Los Angeles - 1992+	Not applicable (1973-2004, 2005 not Louisiana, or 2006+)	37	CA: Los Angeles Registry (06037)	Yes	Not CHSDA	Pacific Coast	California	Breast	Malignant	8.4 Carcinoma of breast	Unclassified	XI(f) Other and unspecified carcinomas	Breast	Breast	C50.4-Upper-outer quadrant of breast	504	8530	Malignant	Unknown	Right - origin of primary	Positive histology	8530/3: Inflammatory carcinoma	8530/3: Inflammatory carcinoma	8500-8549: ductal and lobular neoplasms	Not Brain	XI(f.6) Carcinomas of breast	Female Breast	IV	IV	IV	AJCC 6th ed derived from CS manual/coding instructions, v1.0	Blank(s)	Blank(s)	N/A	T4d	N1	M1	T4d	N1	M1	Blank(s)	Blank(s)	Blank(s)	Any T, Mets	N1
55-59 years	Black	Female	2011	Los Angeles - 1992+	Not applicable (1973-2004, 2005 not Louisiana, or 2006+)	37	CA: Los Angeles Registry (06037)	Yes	Not CHSDA	Pacific Coast	California	Breast	Malignant	8.4 Carcinoma of breast	Unclassified	XI(f) Other and unspecified carcinomas	Breast	Breast	C50.8-Overlapping lesion of breast	508	8530	Malignant	Moderately differentiated; Grade II	Right - origin of primary	Positive histology	8530/3: Inflammatory carcinoma	8530/3: Inflammatory carcinoma	8500-8549: ductal and lobular neoplasms	Not Brain	XI(f.6) Carcinomas of breast	Female Breast	IV	IV	IV	AJCC 6th ed derived from CS manual/coding instructions, v1.0	Blank(s)	Blank(s)	N/A	T4d	N1	M1	T4d	N1	M1	Blank(s)	Blank(s)	Blank(s)	Any T, Mets	N1
55-59 years	Black	Female	2012	Los Angeles - 1992+	Not applicable (1973-2004, 2005 not Louisiana, or 2006+)	37	CA: Los Angeles Registry (06037)	Yes	Not CHSDA	Pacific Coast	California	Breast	Malignant	8.4 Carcinoma of breast	Unclassified	XI(f) Other and unspecified carcinomas	Breast	Breast	C50.9-Breast, NOS	509	8530	Malignant	Moderately differentiated; Grade II	Left - origin of primary	Positive histology	8530/3: Inflammatory carcinoma	8530/3: Inflammatory carcinoma	8500-8549: ductal and lobular neoplasms	Not Brain	XI(f.6) Carcinomas of breast	Female Breast	IIIB	IIIB	IIIB	AJCC 6th ed derived from CS manual/coding instructions, v1.0	Blank(s)	Blank(s)	N/A	T4d	N0	M0	T4d	N0	M0	Blank(s)	Blank(s)	Blank(s)	T4d	N0
60-64 years	White	Female	2011	Los Angeles - 1992+	Not applicable (1973-2004, 2005 not Louisiana, or 2006+)	37	CA: Los Angeles Registry (06037)	Yes	Not CHSDA	Pacific Coast	California	Breast	Malignant	8.4 Carcinoma of breast	Unclassified	XI(f) Other and unspecified carcinomas	Breast	Breast	C50.9-Breast, NOS	509	8530	Malignant	Poorly differentiated; Grade III	Left - origin of primary	Positive histology	8530/3: Inflammatory carcinoma	8530/3: Inflammatory carcinoma	8500-8549: ductal and lobular neoplasms	Not Brain	XI(f.6) Carcinomas of breast	Female Breast	IIIB	IIIB	IIIB	AJCC 6th ed derived from CS manual/coding instructions, v1.0	Blank(s)	Blank(s)	N/A	T4d	N1a	M0	T4d	N1a	M0	Blank(s)	Blank(s)	Blank(s)	T4d	N1
50-54 years	White	Female	2012	Los Angeles - 1992+	Not applicable (1973-2004, 2005 not Louisiana, or 2006+)	37	CA: Los Angeles Registry (06037)	Yes	Not CHSDA	Pacific Coast	California	Breast	Malignant	8.4 Carcinoma of breast	Unclassified	XI(f) Other and unspecified carcinomas	Breast	Breast	C50.1-Central portion of breast	501	8530	Malignant	Moderately differentiated; Grade II	Right - origin of primary	Positive histology	8530/3: Inflammatory carcinoma	8530/3: Inflammatory carcinoma	8500-8549: ductal and lobular neoplasms	Not Brain	XI(f.6) Carcinomas of breast	Female Breast	IIIB	IIIB	IIIB	AJCC 6th ed derived from CS manual/coding instructions, v1.0	Blank(s)	Blank(s)	N/A	T4d	N2NOS	M0	T4d	N2NOS	M0	Blank(s)	Blank(s)	Blank(s)	T4d	N2
50-54 years	White	Female	2012	Los Angeles - 1992+	Not applicable (1973-2004, 2005 not Louisiana, or 2006+)	37	CA: Los Angeles Registry (06037)	Yes	Not CHSDA	Pacific Coast	California	Breast	Malignant	8.4 Carcinoma of breast	Unclassified	XI(f) Other and unspecified carcinomas	Breast	Breast	C50.9-Breast, NOS	509	8530	Malignant	Poorly differentiated; Grade III	Right - origin of primary	Positive histology	8530/3: Inflammatory carcinoma	8530/3: Inflammatory carcinoma	8500-8549: ductal and lobular neoplasms	Not Brain	XI(f.6) Carcinomas of breast	Female Breast	IIIB	IIIB	IIIB	AJCC 6th ed derived from CS manual/coding instructions, v1.0	Blank(s)	Blank(s)	N/A	T4d	N1	M0	T4d	N1	M0	Blank(s)	Blank(s)	Blank(s)	T4d	N1
55-59 years	Black	Female	2012	Los Angeles - 1992+	Not applicable (1973-2004, 2005 not Louisiana, or 2006+)	37	CA: Los Angeles Registry (06037)	Yes	Not CHSDA	Pacific Coast	California	Breast	Malignant	8.4 Carcinoma of breast	Unclassified	XI(f) Other and unspecified carcinomas	Breast	Breast	C50.8-Overlapping lesion of breast	508	8530	Malignant	Poorly differentiated; Grade III	Left - origin of primary	Positive histology	8530/3: Inflammatory carcinoma	8530/3: Inflammatory carcinoma	8500-8549: ductal and lobular neoplasms	Not Brain	XI(f.6) Carcinomas of breast	Female Breast	IIIC	IIIC	IIIC	AJCC 6th ed derived from CS manual/coding instructions, v1.0	Blank(s)	Blank(s)	N/A	T4d	N3b	M0	T4d	N3b	M0	Blank(s)	Blank(s)	Blank(s)	T4d	N3
45-49 years	White	Female	2012	Los Angeles - 1992+	Not applicable (1973-2004, 2005 not Louisiana, or 2006+)	37	CA: Los Angeles Registry (06037)	Yes	Not CHSDA	Pacific Coast	California	Breast	Malignant	8.4 Carcinoma of breast	Unclassified	XI(f) Other and unspecified carcinomas	Breast	Breast	C50.9-Breast, NOS	509	8530	Malignant	Moderately differentiated; Grade II	Right - origin of primary	Positive histology	8530/3: Inflammatory carcinoma	8530/3: Inflammatory carcinoma	8500-8549: ductal and lobular neoplasms	Not Brain	XI(f.6) Carcinomas of breast	Female Breast	IIIB	IIIB	IIIB	AJCC 6th ed derived from CS manual/coding instructions, v1.0	Blank(s)	Blank(s)	N/A	T4d	N1	M0	T4d	N1	M0	Blank(s)	Blank(s)	Blank(s)	T4d	N1
65-69 years	White	Female	2012	Los Angeles - 1992+	Not applicable (1973-2004, 2005 not Louisiana, or 2006+)	37	CA: Los Angeles Registry (06037)	Yes	Not CHSDA	Pacific Coast	California	Breast	Malignant	8.4 Carcinoma of breast	Unclassified	XI(f) Other and unspecified carcinomas	Breast	Breast	C50.8-Overlapping lesion of breast	508	8530	Malignant	Moderately differentiated; Grade II	Right - origin of primary	Positive histology	8530/3: Inflammatory carcinoma	8530/3: Inflammatory carcinoma	8500-8549: ductal and lobular neoplasms	Not Brain	XI(f.6) Carcinomas of breast	Female Breast	IIIC	IIIC	IIIC	AJCC 6th ed derived from CS manual/coding instructions, v1.0	Blank(s)	Blank(s)	N/A	T4d	N3a	M0	T4d	N3a	M0	Blank(s)	Blank(s)	Blank(s)	T4d	N3
55-59 years	White	Female	2012	Los Angeles - 1992+	Not applicable (1973-2004, 2005 not Louisiana, or 2006+)	37	CA: Los Angeles Registry (06037)	Yes	Not CHSDA	Pacific Coast	California	Breast	Malignant	8.4 Carcinoma of breast	Unclassified	XI(f) Other and unspecified carcinomas	Breast	Breast	C50.4-Upper-outer quadrant of breast	504	8530	Malignant	Undifferentiated; anaplastic; Grade IV	Right - origin of primary	Positive histology	8530/3: Inflammatory carcinoma	8530/3: Inflammatory carcinoma	8500-8549: ductal and lobular neoplasms	Not Brain	XI(f.6) Carcinomas of breast	Female Breast	IIIC	IIIC	IIIC	AJCC 6th ed derived from CS manual/coding instructions, v1.0	Blank(s)	Blank(s)	N/A	T4d	N3b	M0	T4d	N3b	M0	Blank(s)	Blank(s)	Blank(s)	T4d	N3
75-79 years	White	Female	2012	Los Angeles - 1992+	Not applicable (1973-2004, 2005 not Louisiana, or 2006+)	37	CA: Los Angeles Registry (06037)	Yes	Not CHSDA	Pacific Coast	California	Breast	Malignant	8.4 Carcinoma of breast	Unclassified	XI(f) Other and unspecified carcinomas	Breast	Breast	C50.9-Breast, NOS	509	8530	Malignant	Poorly differentiated; Grade III	Right - origin of primary	Positive histology	8530/3: Inflammatory carcinoma	8530/3: Inflammatory carcinoma	8500-8549: ductal and lobular neoplasms	Not Brain	XI(f.6) Carcinomas of breast	Female Breast	IIIB	IIIB	IIIB	AJCC 6th ed derived from CS manual/coding instructions, v1.0	Blank(s)	Blank(s)	N/A	T4d	N1	M0	T4d	N1	M0	Blank(s)	Blank(s)	Blank(s)	T4d	N1
55-59 years	White	Female	2012	Los Angeles - 1992+	Not applicable (1973-2004, 2005 not Louisiana, or 2006+)	37	CA: Los Angeles Registry (06037)	Yes	Not CHSDA	Pacific Coast	California	Breast	Malignant	8.4 Carcinoma of breast	Unclassified	XI(f) Other and unspecified carcinomas	Breast	Breast	C50.8-Overlapping lesion of breast	508	8530	Malignant	Poorly differentiated; Grade III	Right - origin of primary	Positive histology	8530/3: Inflammatory carcinoma	8530/3: Inflammatory carcinoma	8500-8549: ductal and lobular neoplasms	Not Brain	XI(f.6) Carcinomas of breast	Female Breast	IIIB	IIIB	IIIB	AJCC 6th ed derived from CS manual/coding instructions, v1.0	Blank(s)	Blank(s)	N/A	T4d	N0	M0	T4d	N0	M0	Blank(s)	Blank(s)	Blank(s)	T4d	N0
40-44 years	White	Female	2011	Los Angeles - 1992+	Not applicable (1973-2004, 2005 not Louisiana, or 2006+)	37	CA: Los Angeles Registry (06037)	Yes	Not CHSDA	Pacific Coast	California	Breast	Malignant	8.4 Carcinoma of breast	Unclassified	XI(f) Other and unspecified carcinomas	Breast	Breast	C50.9-Breast, NOS	509	8530	Malignant	Moderately differentiated; Grade II	Right - origin of primary	Positive histology	8530/3: Inflammatory carcinoma	8530/3: Inflammatory carcinoma	8500-8549: ductal and lobular neoplasms	Not Brain	XI(f.6) Carcinomas of breast	Female Breast	IIIB	UNK Stage	UNK Stage	AJCC 6th ed derived from CS manual/coding instructions, v1.0	Blank(s)	Blank(s)	N/A	T4d	N2a	M0	T4d	N2a	MX	Blank(s)	Blank(s)	Blank(s)	TX Adjusted	NX Adjusted
55-59 years	White	Female	2012	Los Angeles - 1992+	Not applicable (1973-2004, 2005 not Louisiana, or 2006+)	37	CA: Los Angeles Registry (06037)	Yes	Not CHSDA	Pacific Coast	California	Breast	Malignant	8.4 Carcinoma of breast	Unclassified	XI(f) Other and unspecified carcinomas	Breast	Breast	C50.9-Breast, NOS	509	8530	Malignant	Moderately differentiated; Grade II	Right - origin of primary	Positive histology	8530/3: Inflammatory carcinoma	8530/3: Inflammatory carcinoma	8500-8549: ductal and lobular neoplasms	Not Brain	XI(f.6) Carcinomas of breast	Female Breast	IIIB	IIIB	IIIB	AJCC 6th ed derived from CS manual/coding instructions, v1.0	Blank(s)	Blank(s)	N/A	T4d	N2a	M0	T4d	N2a	M0	Blank(s)	Blank(s)	Blank(s)	T4d	N2
45-49 years	Black	Female	2012	Los Angeles - 1992+	Not applicable (1973-2004, 2005 not Louisiana, or 2006+)	37	CA: Los Angeles Registry (06037)	Yes	Not CHSDA	Pacific Coast	California	Breast	Malignant	8.4 Carcinoma of breast	Unclassified	XI(f) Other and unspecified carcinomas	Breast	Breast	C50.9-Breast, NOS	509	8530	Malignant	Poorly differentiated; Grade III	Left - origin of primary	Positive histology	8530/3: Inflammatory carcinoma	8530/3: Inflammatory carcinoma	8500-8549: ductal and lobular neoplasms	Not Brain	XI(f.6) Carcinomas of breast	Female Breast	IIIB	IIIB	IIIB	AJCC 6th ed derived from CS manual/coding instructions, v1.0	Blank(s)	Blank(s)	N/A	T4d	N2a	M0	T4d	N2a	M0	Blank(s)	Blank(s)	Blank(s)	T4d	N2
70-74 years	White	Female	2012	Los Angeles - 1992+	Not applicable (1973-2004, 2005 not Louisiana, or 2006+)	37	CA: Los Angeles Registry (06037)	Yes	Not CHSDA	Pacific Coast	California	Breast	Malignant	8.4 Carcinoma of breast	Unclassified	XI(f) Other and unspecified carcinomas	Breast	Breast	C50.9-Breast, NOS	509	8530	Malignant	Poorly differentiated; Grade III	Right - origin of primary	Positive histology	8530/3: Inflammatory carcinoma	8530/3: Inflammatory carcinoma	8500-8549: ductal and lobular neoplasms	Not Brain	XI(f.6) Carcinomas of breast	Female Breast	IV	IV	IIIC	AJCC 6th ed derived from CS manual/coding instructions, v1.0	Blank(s)	Blank(s)	N/A	T4d	N3c	M1	T4d	N3c	M1	Blank(s)	Blank(s)	Blank(s)	T4d	N3
75-79 years	White	Female	2012	Los Angeles - 1992+	Not applicable (1973-2004, 2005 not Louisiana, or 2006+)	37	CA: Los Angeles Registry (06037)	Yes	Not CHSDA	Pacific Coast	California	Breast	Malignant	8.4 Carcinoma of breast	Unclassified	XI(f) Other and unspecified carcinomas	Breast	Breast	C50.8-Overlapping lesion of breast	508	8530	Malignant	Poorly differentiated; Grade III	Right - origin of primary	Positive histology	8530/3: Inflammatory carcinoma	8530/3: Inflammatory carcinoma	8500-8549: ductal and lobular neoplasms	Not Brain	XI(f.6) Carcinomas of breast	Female Breast	IV	IV	IV	AJCC 6th ed derived from CS manual/coding instructions, v1.0	Blank(s)	Blank(s)	N/A	T4d	N1NOS	M1	T4d	N1NOS	M1	Blank(s)	Blank(s)	Blank(s)	Any T, Mets	N1
65-69 years	Other (American Indian/AK Native, Asian/Pacific Islander)	Female	2012	Los Angeles - 1992+	Not applicable (1973-2004, 2005 not Louisiana, or 2006+)	37	CA: Los Angeles Registry (06037)	Yes	Not CHSDA	Pacific Coast	California	Breast	Malignant	8.4 Carcinoma of breast	Unclassified	XI(f) Other and unspecified carcinomas	Breast	Breast	C50.9-Breast, NOS	509	8530	Malignant	Moderately differentiated; Grade II	Left - origin of primary	Positive histology	8530/3: Inflammatory carcinoma	8530/3: Inflammatory carcinoma	8500-8549: ductal and lobular neoplasms	Not Brain	XI(f.6) Carcinomas of breast	Female Breast	IV	IV	IV	AJCC 6th ed derived from CS manual/coding instructions, v1.0	Blank(s)	Blank(s)	N/A	T4d	N1	M1	T4d	N1	M1	Blank(s)	Blank(s)	Blank(s)	Any T, Mets	N3
35-39 years	Black	Female	2012	Los Angeles - 1992+	Not applicable (1973-2004, 2005 not Louisiana, or 2006+)	37	CA: Los Angeles Registry (06037)	Yes	Not CHSDA	Pacific Coast	California	Breast	Malignant	8.4 Carcinoma of breast	Unclassified	XI(f) Other and unspecified carcinomas	Breast	Breast	C50.4-Upper-outer quadrant of breast	504	8530	Malignant	Unknown	Left - origin of primary	Positive histology	8530/3: Inflammatory carcinoma	8530/3: Inflammatory carcinoma	8500-8549: ductal and lobular neoplasms	Not Brain	XI(f.6) Carcinomas of breast	Female Breast	IIIB	IIIB	IIIB	AJCC 6th ed derived from CS manual/coding instructions, v1.0	Blank(s)	Blank(s)	N/A	T4d	N0	M0	T4d	N0	M0	Blank(s)	Blank(s)	Blank(s)	T4d	N0
50-54 years	Black	Female	2012	Los Angeles - 1992+	Not applicable (1973-2004, 2005 not Louisiana, or 2006+)	37	CA: Los Angeles Registry (06037)	Yes	Not CHSDA	Pacific Coast	California	Breast	Malignant	8.4 Carcinoma of breast	Unclassified	XI(f) Other and unspecified carcinomas	Breast	Breast	C50.9-Breast, NOS	509	8530	Malignant	Unknown	Left - origin of primary	Positive histology	8530/3: Inflammatory carcinoma	8530/3: Inflammatory carcinoma	8500-8549: ductal and lobular neoplasms	Not Brain	XI(f.6) Carcinomas of breast	Female Breast	IV	IV	IV	AJCC 6th ed derived from CS manual/coding instructions, v1.0	Blank(s)	Blank(s)	N/A	T4d	N1	M1	T4d	N1	M1	Blank(s)	Blank(s)	Blank(s)	Any T, Mets	N1
45-49 years	White	Female	2012	Los Angeles - 1992+	Not applicable (1973-2004, 2005 not Louisiana, or 2006+)	37	CA: Los Angeles Registry (06037)	Yes	Not CHSDA	Pacific Coast	California	Breast	Malignant	8.4 Carcinoma of breast	Unclassified	XI(f) Other and unspecified carcinomas	Breast	Breast	C50.8-Overlapping lesion of breast	508	8530	Malignant	Poorly differentiated; Grade III	Left - origin of primary	Positive histology	8530/3: Inflammatory carcinoma	8530/3: Inflammatory carcinoma	8500-8549: ductal and lobular neoplasms	Not Brain	XI(f.6) Carcinomas of breast	Female Breast	IV	IV	IV	AJCC 6th ed derived from CS manual/coding instructions, v1.0	Blank(s)	Blank(s)	N/A	T4d	N0	M1	T4d	N0	M1	Blank(s)	Blank(s)	Blank(s)	Any T, Mets	N0
85+ years	White	Female	2012	Los Angeles - 1992+	Not applicable (1973-2004, 2005 not Louisiana, or 2006+)	37	CA: Los Angeles Registry (06037)	Yes	Not CHSDA	Pacific Coast	California	Breast	Malignant	8.4 Carcinoma of breast	Unclassified	XI(f) Other and unspecified carcinomas	Breast	Breast	C50.8-Overlapping lesion of breast	508	8530	Malignant	Unknown	Right - origin of primary	Positive histology	8530/3: Inflammatory carcinoma	8530/3: Inflammatory carcinoma	8500-8549: ductal and lobular neoplasms	Not Brain	XI(f.6) Carcinomas of breast	Female Breast	IV	IV	IIIC	AJCC 6th ed derived from CS manual/coding instructions, v1.0	Blank(s)	Blank(s)	N/A	T4d	N3a	M1	T4d	N3a	M1	Blank(s)	Blank(s)	Blank(s)	T4d	N3
55-59 years	White	Female	2013	Los Angeles - 1992+	Not applicable (1973-2004, 2005 not Louisiana, or 2006+)	37	CA: Los Angeles Registry (06037)	Yes	Not CHSDA	Pacific Coast	California	Breast	Malignant	8.4 Carcinoma of breast	Unclassified	XI(f) Other and unspecified carcinomas	Breast	Breast	C50.8-Overlapping lesion of breast	508	8530	Malignant	Poorly differentiated; Grade III	Right - origin of primary	Positive histology	8530/3: Inflammatory carcinoma	8530/3: Inflammatory carcinoma	8500-8549: ductal and lobular neoplasms	Not Brain	XI(f.6) Carcinomas of breast	Female Breast	IIIB	IIIB	IIIB	AJCC 6th ed derived from CS manual/coding instructions, v1.0	Blank(s)	Blank(s)	N/A	T4d	N1a	M0	T4d	N1a	M0	Blank(s)	Blank(s)	Blank(s)	T4d	N1
70-74 years	White	Female	2013	Los Angeles - 1992+	Not applicable (1973-2004, 2005 not Louisiana, or 2006+)	37	CA: Los Angeles Registry (06037)	Yes	Not CHSDA	Pacific Coast	California	Breast	Malignant	8.4 Carcinoma of breast	Unclassified	XI(f) Other and unspecified carcinomas	Breast	Breast	C50.9-Breast, NOS	509	8530	Malignant	Moderately differentiated; Grade II	Left - origin of primary	Positive histology	8530/3: Inflammatory carcinoma	8530/3: Inflammatory carcinoma	8500-8549: ductal and lobular neoplasms	Not Brain	XI(f.6) Carcinomas of breast	Female Breast	IV	IV	IV	AJCC 6th ed derived from CS manual/coding instructions, v1.0	Blank(s)	Blank(s)	N/A	T4d	N1	M1	T4d	N1	M1	Blank(s)	Blank(s)	Blank(s)	Any T, Mets	N1
70-74 years	White	Female	2013	Los Angeles - 1992+	Not applicable (1973-2004, 2005 not Louisiana, or 2006+)	37	CA: Los Angeles Registry (06037)	Yes	Not CHSDA	Pacific Coast	California	Breast	Malignant	8.4 Carcinoma of breast	Unclassified	XI(f) Other and unspecified carcinomas	Breast	Breast	C50.9-Breast, NOS	509	8530	Malignant	Moderately differentiated; Grade II	Right - origin of primary	Positive histology	8530/3: Inflammatory carcinoma	8530/3: Inflammatory carcinoma	8500-8549: ductal and lobular neoplasms	Not Brain	XI(f.6) Carcinomas of breast	Female Breast	IV	IV	IV	AJCC 6th ed derived from CS manual/coding instructions, v1.0	Blank(s)	Blank(s)	N/A	T4d	N1	M1	T4d	N1	M1	Blank(s)	Blank(s)	Blank(s)	Any T, Mets	N1
60-64 years	Black	Female	2012	Los Angeles - 1992+	Not applicable (1973-2004, 2005 not Louisiana, or 2006+)	37	CA: Los Angeles Registry (06037)	Yes	Not CHSDA	Pacific Coast	California	Breast	Malignant	8.4 Carcinoma of breast	Unclassified	XI(f) Other and unspecified carcinomas	Breast	Breast	C50.9-Breast, NOS	509	8530	Malignant	Unknown	Right - origin of primary	Positive histology	8530/3: Inflammatory carcinoma	8530/3: Inflammatory carcinoma	8500-8549: ductal and lobular neoplasms	Not Brain	XI(f.6) Carcinomas of breast	Female Breast	IV	IV	IV	AJCC 6th ed derived from CS manual/coding instructions, v1.0	Blank(s)	Blank(s)	N/A	T4d	N1	M1	T4d	N1	M1	Blank(s)	Blank(s)	Blank(s)	Any T, Mets	N3
80-84 years	White	Female	2013	Los Angeles - 1992+	Not applicable (1973-2004, 2005 not Louisiana, or 2006+)	37	CA: Los Angeles Registry (06037)	Yes	Not CHSDA	Pacific Coast	California	Breast	Malignant	8.4 Carcinoma of breast	Unclassified	XI(f) Other and unspecified carcinomas	Breast	Breast	C50.8-Overlapping lesion of breast	508	8530	Malignant	Poorly differentiated; Grade III	Left - origin of primary	Positive histology	8530/3: Inflammatory carcinoma	8530/3: Inflammatory carcinoma	8500-8549: ductal and lobular neoplasms	Not Brain	XI(f.6) Carcinomas of breast	Female Breast	IIIB	IIIB	IIIB	AJCC 6th ed derived from CS manual/coding instructions, v1.0	Blank(s)	Blank(s)	N/A	T4d	N1mi	M0	T4d	N1mi	M0	Blank(s)	Blank(s)	Blank(s)	T4d	N1
55-59 years	White	Female	2012	Los Angeles - 1992+	Not applicable (1973-2004, 2005 not Louisiana, or 2006+)	37	CA: Los Angeles Registry (06037)	Yes	Not CHSDA	Pacific Coast	California	Breast	Malignant	8.4 Carcinoma of breast	Unclassified	XI(f) Other and unspecified carcinomas	Breast	Breast	C50.8-Overlapping lesion of breast	508	8530	Malignant	Poorly differentiated; Grade III	Left - origin of primary	Positive histology	8530/3: Inflammatory carcinoma	8530/3: Inflammatory carcinoma	8500-8549: ductal and lobular neoplasms	Not Brain	XI(f.6) Carcinomas of breast	Female Breast	IIIB	IIIB	IIIB	AJCC 6th ed derived from CS manual/coding instructions, v1.0	Blank(s)	Blank(s)	N/A	T4d	N1	M0	T4d	N1	M0	Blank(s)	Blank(s)	Blank(s)	T4d	N1
50-54 years	White	Female	2013	Los Angeles - 1992+	Not applicable (1973-2004, 2005 not Louisiana, or 2006+)	37	CA: Los Angeles Registry (06037)	Yes	Not CHSDA	Pacific Coast	California	Breast	Malignant	8.4 Carcinoma of breast	Unclassified	XI(f) Other and unspecified carcinomas	Breast	Breast	C50.9-Breast, NOS	509	8530	Malignant	Unknown	Left - origin of primary	Positive histology	8530/3: Inflammatory carcinoma	8530/3: Inflammatory carcinoma	8500-8549: ductal and lobular neoplasms	Not Brain	XI(f.6) Carcinomas of breast	Female Breast	IV	IV	IV	AJCC 6th ed derived from CS manual/coding instructions, v1.0	Blank(s)	Blank(s)	N/A	T4d	N1NOS	M1	T4d	N1NOS	M1	Blank(s)	Blank(s)	Blank(s)	Any T, Mets	N1
45-49 years	White	Female	2013	Los Angeles - 1992+	Not applicable (1973-2004, 2005 not Louisiana, or 2006+)	37	CA: Los Angeles Registry (06037)	Yes	Not CHSDA	Pacific Coast	California	Breast	Malignant	8.4 Carcinoma of breast	Unclassified	XI(f) Other and unspecified carcinomas	Breast	Breast	C50.9-Breast, NOS	509	8530	Malignant	Unknown	Left - origin of primary	Positive histology	8530/3: Inflammatory carcinoma	8530/3: Inflammatory carcinoma	8500-8549: ductal and lobular neoplasms	Not Brain	XI(f.6) Carcinomas of breast	Female Breast	IIIB	IIIB	IIIB	AJCC 6th ed derived from CS manual/coding instructions, v1.0	Blank(s)	Blank(s)	N/A	T4d	N0	M0	T4d	N0	M0	Blank(s)	Blank(s)	Blank(s)	T4d	N0
70-74 years	White	Female	2013	Los Angeles - 1992+	Not applicable (1973-2004, 2005 not Louisiana, or 2006+)	37	CA: Los Angeles Registry (06037)	Yes	Not CHSDA	Pacific Coast	California	Breast	Malignant	8.4 Carcinoma of breast	Unclassified	XI(f) Other and unspecified carcinomas	Breast	Breast	C50.4-Upper-outer quadrant of breast	504	8530	Malignant	Poorly differentiated; Grade III	Left - origin of primary	Positive histology	8530/3: Inflammatory carcinoma	8530/3: Inflammatory carcinoma	8500-8549: ductal and lobular neoplasms	Not Brain	XI(f.6) Carcinomas of breast	Female Breast	IIIB	IIIB	IIIB	AJCC 6th ed derived from CS manual/coding instructions, v1.0	Blank(s)	Blank(s)	N/A	T4d	N0	M0	T4d	N0	M0	Blank(s)	Blank(s)	Blank(s)	T4d	N0
35-39 years	Black	Female	2013	Los Angeles - 1992+	Not applicable (1973-2004, 2005 not Louisiana, or 2006+)	37	CA: Los Angeles Registry (06037)	Yes	Not CHSDA	Pacific Coast	California	Breast	Malignant	8.4 Carcinoma of breast	Unclassified	XI(f) Other and unspecified carcinomas	Breast	Breast	C50.9-Breast, NOS	509	8530	Malignant	Poorly differentiated; Grade III	Right - origin of primary	Positive histology	8530/3: Inflammatory carcinoma	8530/3: Inflammatory carcinoma	8500-8549: ductal and lobular neoplasms	Not Brain	XI(f.6) Carcinomas of breast	Female Breast	IIIB	IIIB	IIIB	AJCC 6th ed derived from CS manual/coding instructions, v1.0	Blank(s)	Blank(s)	N/A	T4d	N1a	M0	T4d	N1a	M0	Blank(s)	Blank(s)	Blank(s)	T4d	N1
60-64 years	White	Female	2013	Los Angeles - 1992+	Not applicable (1973-2004, 2005 not Louisiana, or 2006+)	37	CA: Los Angeles Registry (06037)	Yes	Not CHSDA	Pacific Coast	California	Breast	Malignant	8.4 Carcinoma of breast	Unclassified	XI(f) Other and unspecified carcinomas	Breast	Breast	C50.8-Overlapping lesion of breast	508	8530	Malignant	Unknown	Right - origin of primary	Positive histology	8530/3: Inflammatory carcinoma	8530/3: Inflammatory carcinoma	8500-8549: ductal and lobular neoplasms	Not Brain	XI(f.6) Carcinomas of breast	Female Breast	IV	IV	IV	AJCC 6th ed derived from CS manual/coding instructions, v1.0	Blank(s)	Blank(s)	N/A	T4d	N2a	M1	T4d	N2a	M1	Blank(s)	Blank(s)	Blank(s)	Any T, Mets	N3
60-64 years	White	Female	2013	Los Angeles - 1992+	Not applicable (1973-2004, 2005 not Louisiana, or 2006+)	37	CA: Los Angeles Registry (06037)	Yes	Not CHSDA	Pacific Coast	California	Breast	Malignant	8.4 Carcinoma of breast	Unclassified	XI(f) Other and unspecified carcinomas	Breast	Breast	C50.9-Breast, NOS	509	8530	Malignant	Poorly differentiated; Grade III	Left - origin of primary	Positive histology	8530/3: Inflammatory carcinoma	8530/3: Inflammatory carcinoma	8500-8549: ductal and lobular neoplasms	Not Brain	XI(f.6) Carcinomas of breast	Female Breast	IIIB	IIIB	IIIB	AJCC 6th ed derived from CS manual/coding instructions, v1.0	Blank(s)	Blank(s)	N/A	T4d	N2a	M0	T4d	N2a	M0	Blank(s)	Blank(s)	Blank(s)	T4d	N2
70-74 years	White	Female	2013	Los Angeles - 1992+	Not applicable (1973-2004, 2005 not Louisiana, or 2006+)	37	CA: Los Angeles Registry (06037)	Yes	Not CHSDA	Pacific Coast	California	Breast	Malignant	8.4 Carcinoma of breast	Unclassified	XI(f) Other and unspecified carcinomas	Breast	Breast	C50.9-Breast, NOS	509	8530	Malignant	Moderately differentiated; Grade II	Right - origin of primary	Positive histology	8530/3: Inflammatory carcinoma	8530/3: Inflammatory carcinoma	8500-8549: ductal and lobular neoplasms	Not Brain	XI(f.6) Carcinomas of breast	Female Breast	IIIB	IIIB	IIIB	AJCC 6th ed derived from CS manual/coding instructions, v1.0	Blank(s)	Blank(s)	N/A	T4d	N1	M0	T4d	N1	M0	Blank(s)	Blank(s)	Blank(s)	T4d	N1
60-64 years	White	Female	2013	Los Angeles - 1992+	Not applicable (1973-2004, 2005 not Louisiana, or 2006+)	37	CA: Los Angeles Registry (06037)	Yes	Not CHSDA	Pacific Coast	California	Breast	Malignant	8.4 Carcinoma of breast	Unclassified	XI(f) Other and unspecified carcinomas	Breast	Breast	C50.8-Overlapping lesion of breast	508	8530	Malignant	Moderately differentiated; Grade II	Left - origin of primary	Positive histology	8530/3: Inflammatory carcinoma	8530/3: Inflammatory carcinoma	8500-8549: ductal and lobular neoplasms	Not Brain	XI(f.6) Carcinomas of breast	Female Breast	IV	IV	IV	AJCC 6th ed derived from CS manual/coding instructions, v1.0	Blank(s)	Blank(s)	N/A	T4d	N1	M1	T4d	N1	M1	Blank(s)	Blank(s)	Blank(s)	Any T, Mets	N1
55-59 years	White	Female	2013	Los Angeles - 1992+	Not applicable (1973-2004, 2005 not Louisiana, or 2006+)	37	CA: Los Angeles Registry (06037)	Yes	Not CHSDA	Pacific Coast	California	Breast	Malignant	8.4 Carcinoma of breast	Unclassified	XI(f) Other and unspecified carcinomas	Breast	Breast	C50.4-Upper-outer quadrant of breast	504	8530	Malignant	Moderately differentiated; Grade II	Left - origin of primary	Positive histology	8530/3: Inflammatory carcinoma	8530/3: Inflammatory carcinoma	8500-8549: ductal and lobular neoplasms	Not Brain	XI(f.6) Carcinomas of breast	Female Breast	IIIB	IIIB	IIIB	AJCC 6th ed derived from CS manual/coding instructions, v1.0	Blank(s)	Blank(s)	N/A	T4d	N1	M0	T4d	N1	M0	Blank(s)	Blank(s)	Blank(s)	T4d	N1
80-84 years	White	Female	2012	Los Angeles - 1992+	Not applicable (1973-2004, 2005 not Louisiana, or 2006+)	37	CA: Los Angeles Registry (06037)	Yes	Not CHSDA	Pacific Coast	California	Breast	Malignant	8.4 Carcinoma of breast	Unclassified	XI(f) Other and unspecified carcinomas	Breast	Breast	C50.9-Breast, NOS	509	8530	Malignant	Unknown	Right - origin of primary	Positive histology	8530/3: Inflammatory carcinoma	8530/3: Inflammatory carcinoma	8500-8549: ductal and lobular neoplasms	Not Brain	XI(f.6) Carcinomas of breast	Female Breast	IIIB	IIIB	IIIB	AJCC 6th ed derived from CS manual/coding instructions, v1.0	Blank(s)	Blank(s)	N/A	T4d	N0	M0	T4d	N0	M0	Blank(s)	Blank(s)	Blank(s)	T4d	N0
50-54 years	White	Female	2013	Los Angeles - 1992+	Not applicable (1973-2004, 2005 not Louisiana, or 2006+)	37	CA: Los Angeles Registry (06037)	Yes	Not CHSDA	Pacific Coast	California	Breast	Malignant	8.4 Carcinoma of breast	Unclassified	XI(f) Other and unspecified carcinomas	Breast	Breast	C50.2-Upper-inner quadrant of breast	502	8530	Malignant	Unknown	Left - origin of primary	Positive histology	8530/3: Inflammatory carcinoma	8530/3: Inflammatory carcinoma	8500-8549: ductal and lobular neoplasms	Not Brain	XI(f.6) Carcinomas of breast	Female Breast	IIIB	IIIB	IIIB	AJCC 6th ed derived from CS manual/coding instructions, v1.0	Blank(s)	Blank(s)	N/A	T4d	N1	M0	T4d	N1	M0	Blank(s)	Blank(s)	Blank(s)	T4d	N1
60-64 years	White	Female	2013	Los Angeles - 1992+	Not applicable (1973-2004, 2005 not Louisiana, or 2006+)	37	CA: Los Angeles Registry (06037)	Yes	Not CHSDA	Pacific Coast	California	Breast	Malignant	8.4 Carcinoma of breast	Unclassified	XI(f) Other and unspecified carcinomas	Breast	Breast	C50.9-Breast, NOS	509	8530	Malignant	Poorly differentiated; Grade III	Right - origin of primary	Positive histology	8530/3: Inflammatory carcinoma	8530/3: Inflammatory carcinoma	8500-8549: ductal and lobular neoplasms	Not Brain	XI(f.6) Carcinomas of breast	Female Breast	IV	IV	IIIC	AJCC 6th ed derived from CS manual/coding instructions, v1.0	Blank(s)	Blank(s)	N/A	T4d	N1	M1	T4d	N1	M1	Blank(s)	Blank(s)	Blank(s)	T4d	N3
45-49 years	White	Female	2013	Los Angeles - 1992+	Not applicable (1973-2004, 2005 not Louisiana, or 2006+)	37	CA: Los Angeles Registry (06037)	Yes	Not CHSDA	Pacific Coast	California	Breast	Malignant	8.4 Carcinoma of breast	Unclassified	XI(f) Other and unspecified carcinomas	Breast	Breast	C50.9-Breast, NOS	509	8530	Malignant	Poorly differentiated; Grade III	Right - origin of primary	Positive histology	8530/3: Inflammatory carcinoma	8530/3: Inflammatory carcinoma	8500-8549: ductal and lobular neoplasms	Not Brain	XI(f.6) Carcinomas of breast	Female Breast	IIIB	IIIB	IIIB	AJCC 6th ed derived from CS manual/coding instructions, v1.0	Blank(s)	Blank(s)	N/A	T4d	N2a	M0	T4d	N2a	M0	Blank(s)	Blank(s)	Blank(s)	T4d	N2
45-49 years	White	Female	2013	Los Angeles - 1992+	Not applicable (1973-2004, 2005 not Louisiana, or 2006+)	37	CA: Los Angeles Registry (06037)	Yes	Not CHSDA	Pacific Coast	California	Breast	Malignant	8.4 Carcinoma of breast	Unclassified	XI(f) Other and unspecified carcinomas	Breast	Breast	C50.9-Breast, NOS	509	8530	Malignant	Moderately differentiated; Grade II	Left - origin of primary	Positive histology	8530/3: Inflammatory carcinoma	8530/3: Inflammatory carcinoma	8500-8549: ductal and lobular neoplasms	Not Brain	XI(f.6) Carcinomas of breast	Female Breast	IIIB	IIIB	IIIB	AJCC 6th ed derived from CS manual/coding instructions, v1.0	Blank(s)	Blank(s)	N/A	T4d	N1	M0	T4d	N1	M0	Blank(s)	Blank(s)	Blank(s)	T4d	N1
60-64 years	White	Female	2013	Los Angeles - 1992+	Not applicable (1973-2004, 2005 not Louisiana, or 2006+)	37	CA: Los Angeles Registry (06037)	Yes	Not CHSDA	Pacific Coast	California	Breast	Malignant	8.4 Carcinoma of breast	Unclassified	XI(f) Other and unspecified carcinomas	Breast	Breast	C50.9-Breast, NOS	509	8530	Malignant	Well differentiated; Grade I	Right - origin of primary	Positive histology	8530/3: Inflammatory carcinoma	8530/3: Inflammatory carcinoma	8500-8549: ductal and lobular neoplasms	Not Brain	XI(f.6) Carcinomas of breast	Female Breast	IIIC	IIIC	IIIC	AJCC 6th ed derived from CS manual/coding instructions, v1.0	Blank(s)	Blank(s)	N/A	T4d	N3a	M0	T4d	N3a	M0	Blank(s)	Blank(s)	Blank(s)	T4d	N3
45-49 years	White	Female	2014	Los Angeles - 1992+	Not applicable (1973-2004, 2005 not Louisiana, or 2006+)	37	CA: Los Angeles Registry (06037)	Yes	Not CHSDA	Pacific Coast	California	Breast	Malignant	8.4 Carcinoma of breast	Unclassified	XI(f) Other and unspecified carcinomas	Breast	Breast	C50.9-Breast, NOS	509	8530	Malignant	Poorly differentiated; Grade III	Bilateral, single primary	Positive histology	8530/3: Inflammatory carcinoma	8530/3: Inflammatory carcinoma	8500-8549: ductal and lobular neoplasms	Not Brain	XI(f.6) Carcinomas of breast	Female Breast	IV	IV	IV	AJCC 6th ed derived from CS manual/coding instructions, v1.0	Blank(s)	Blank(s)	N/A	T4d	N1	M1	T4d	N1	M1	Blank(s)	Blank(s)	Blank(s)	Any T, Mets	N1
60-64 years	White	Female	2014	Los Angeles - 1992+	Not applicable (1973-2004, 2005 not Louisiana, or 2006+)	37	CA: Los Angeles Registry (06037)	Yes	Not CHSDA	Pacific Coast	California	Breast	Malignant	8.4 Carcinoma of breast	Unclassified	XI(f) Other and unspecified carcinomas	Breast	Breast	C50.9-Breast, NOS	509	8530	Malignant	Poorly differentiated; Grade III	Left - origin of primary	Positive histology	8530/3: Inflammatory carcinoma	8530/3: Inflammatory carcinoma	8500-8549: ductal and lobular neoplasms	Not Brain	XI(f.6) Carcinomas of breast	Female Breast	IIIB	IIIB	IIIB	AJCC 6th ed derived from CS manual/coding instructions, v1.0	Blank(s)	Blank(s)	N/A	T4d	N2NOS	M0	T4d	N2NOS	M0	Blank(s)	Blank(s)	Blank(s)	T4d	N2
50-54 years	White	Female	2014	Los Angeles - 1992+	Not applicable (1973-2004, 2005 not Louisiana, or 2006+)	37	CA: Los Angeles Registry (06037)	Yes	Not CHSDA	Pacific Coast	California	Breast	Malignant	8.4 Carcinoma of breast	Unclassified	XI(f) Other and unspecified carcinomas	Breast	Breast	C50.8-Overlapping lesion of breast	508	8530	Malignant	Moderately differentiated; Grade II	Right - origin of primary	Positive histology	8530/3: Inflammatory carcinoma	8530/3: Inflammatory carcinoma	8500-8549: ductal and lobular neoplasms	Not Brain	XI(f.6) Carcinomas of breast	Female Breast	IV	IV	IV	AJCC 6th ed derived from CS manual/coding instructions, v1.0	Blank(s)	Blank(s)	N/A	T4d	N1	M1	T4d	N1	M1	Blank(s)	Blank(s)	Blank(s)	Any T, Mets	N1
45-49 years	White	Female	2014	Los Angeles - 1992+	Not applicable (1973-2004, 2005 not Louisiana, or 2006+)	37	CA: Los Angeles Registry (06037)	Yes	Not CHSDA	Pacific Coast	California	Breast	Malignant	8.4 Carcinoma of breast	Unclassified	XI(f) Other and unspecified carcinomas	Breast	Breast	C50.4-Upper-outer quadrant of breast	504	8530	Malignant	Moderately differentiated; Grade II	Right - origin of primary	Positive histology	8530/3: Inflammatory carcinoma	8530/3: Inflammatory carcinoma	8500-8549: ductal and lobular neoplasms	Not Brain	XI(f.6) Carcinomas of breast	Female Breast	IIIB	IIIB	IIIB	AJCC 6th ed derived from CS manual/coding instructions, v1.0	Blank(s)	Blank(s)	N/A	T4d	N1NOS	M0	T4d	N1NOS	M0	Blank(s)	Blank(s)	Blank(s)	T4d	N1
65-69 years	White	Female	2014	Los Angeles - 1992+	Not applicable (1973-2004, 2005 not Louisiana, or 2006+)	37	CA: Los Angeles Registry (06037)	Yes	Not CHSDA	Pacific Coast	California	Breast	Malignant	8.4 Carcinoma of breast	Unclassified	XI(f) Other and unspecified carcinomas	Breast	Breast	C50.9-Breast, NOS	509	8530	Malignant	Poorly differentiated; Grade III	Left - origin of primary	Positive histology	8530/3: Inflammatory carcinoma	8530/3: Inflammatory carcinoma	8500-8549: ductal and lobular neoplasms	Not Brain	XI(f.6) Carcinomas of breast	Female Breast	IIINOS	UNK Stage	UNK Stage	AJCC 6th ed derived from CS manual/coding instructions, v1.0	Blank(s)	Blank(s)	N/A	T4d	NX	M0	T4d	NX	MX	Blank(s)	Blank(s)	Blank(s)	TX Adjusted	NX Adjusted
45-49 years	White	Female	2014	Los Angeles - 1992+	Not applicable (1973-2004, 2005 not Louisiana, or 2006+)	37	CA: Los Angeles Registry (06037)	Yes	Not CHSDA	Pacific Coast	California	Breast	Malignant	8.4 Carcinoma of breast	Unclassified	XI(f) Other and unspecified carcinomas	Breast	Breast	C50.4-Upper-outer quadrant of breast	504	8530	Malignant	Moderately differentiated; Grade II	Right - origin of primary	Positive histology	8530/3: Inflammatory carcinoma	8530/3: Inflammatory carcinoma	8500-8549: ductal and lobular neoplasms	Not Brain	XI(f.6) Carcinomas of breast	Female Breast	IIIB	IIIB	IIIB	AJCC 6th ed derived from CS manual/coding instructions, v1.0	Blank(s)	Blank(s)	N/A	T4d	N1	M0	T4d	N1	M0	Blank(s)	Blank(s)	Blank(s)	T4d	N1
40-44 years	White	Female	2013	Los Angeles - 1992+	Not applicable (1973-2004, 2005 not Louisiana, or 2006+)	37	CA: Los Angeles Registry (06037)	Yes	Not CHSDA	Pacific Coast	California	Breast	Malignant	8.4 Carcinoma of breast	Unclassified	XI(f) Other and unspecified carcinomas	Breast	Breast	C50.9-Breast, NOS	509	8530	Malignant	Poorly differentiated; Grade III	Left - origin of primary	Positive histology	8530/3: Inflammatory carcinoma	8530/3: Inflammatory carcinoma	8500-8549: ductal and lobular neoplasms	Not Brain	XI(f.6) Carcinomas of breast	Female Breast	IIIB	IIIB	IIIB	AJCC 6th ed derived from CS manual/coding instructions, v1.0	Blank(s)	Blank(s)	N/A	T4d	N1	M0	T4d	N1	M0	Blank(s)	Blank(s)	Blank(s)	T4d	N1
45-49 years	White	Female	2013	Los Angeles - 1992+	Not applicable (1973-2004, 2005 not Louisiana, or 2006+)	37	CA: Los Angeles Registry (06037)	Yes	Not CHSDA	Pacific Coast	California	Breast	Malignant	8.4 Carcinoma of breast	Unclassified	XI(f) Other and unspecified carcinomas	Breast	Breast	C50.1-Central portion of breast	501	8530	Malignant	Moderately differentiated; Grade II	Right - origin of primary	Positive histology	8530/3: Inflammatory carcinoma	8530/3: Inflammatory carcinoma	8500-8549: ductal and lobular neoplasms	Not Brain	XI(f.6) Carcinomas of breast	Female Breast	IIIC	IIIC	IIIC	AJCC 6th ed derived from CS manual/coding instructions, v1.0	Blank(s)	Blank(s)	N/A	T4d	N3a	M0	T4d	N3a	M0	Blank(s)	Blank(s)	Blank(s)	T4d	N3
60-64 years	Black	Female	2014	Los Angeles - 1992+	Not applicable (1973-2004, 2005 not Louisiana, or 2006+)	37	CA: Los Angeles Registry (06037)	Yes	Not CHSDA	Pacific Coast	California	Breast	Malignant	8.4 Carcinoma of breast	Unclassified	XI(f) Other and unspecified carcinomas	Breast	Breast	C50.4-Upper-outer quadrant of breast	504	8530	Malignant	Poorly differentiated; Grade III	Left - origin of primary	Positive histology	8530/3: Inflammatory carcinoma	8530/3: Inflammatory carcinoma	8500-8549: ductal and lobular neoplasms	Not Brain	XI(f.6) Carcinomas of breast	Female Breast	IIIC	IIIC	IIIC	AJCC 6th ed derived from CS manual/coding instructions, v1.0	Blank(s)	Blank(s)	N/A	T4d	N3b	M0	T4d	N3b	M0	Blank(s)	Blank(s)	Blank(s)	T4d	N3
30-34 years	Other (American Indian/AK Native, Asian/Pacific Islander)	Female	2014	Los Angeles - 1992+	Not applicable (1973-2004, 2005 not Louisiana, or 2006+)	37	CA: Los Angeles Registry (06037)	Yes	Not CHSDA	Pacific Coast	California	Breast	Malignant	8.4 Carcinoma of breast	Unclassified	XI(f) Other and unspecified carcinomas	Breast	Breast	C50.9-Breast, NOS	509	8530	Malignant	Moderately differentiated; Grade II	Right - origin of primary	Positive histology	8530/3: Inflammatory carcinoma	8530/3: Inflammatory carcinoma	8500-8549: ductal and lobular neoplasms	Not Brain	XI(f.6) Carcinomas of breast	Female Breast	IIIB	UNK Stage	UNK Stage	AJCC 6th ed derived from CS manual/coding instructions, v1.0	Blank(s)	Blank(s)	N/A	T4d	N1	M0	T4d	N1	MX	Blank(s)	Blank(s)	Blank(s)	TX Adjusted	NX Adjusted
50-54 years	Other (American Indian/AK Native, Asian/Pacific Islander)	Female	2013	Los Angeles - 1992+	Not applicable (1973-2004, 2005 not Louisiana, or 2006+)	37	CA: Los Angeles Registry (06037)	Yes	Not CHSDA	Pacific Coast	California	Breast	Malignant	8.4 Carcinoma of breast	Unclassified	XI(f) Other and unspecified carcinomas	Breast	Breast	C50.4-Upper-outer quadrant of breast	504	8530	Malignant	Unknown	Right - origin of primary	Positive histology	8530/3: Inflammatory carcinoma	8530/3: Inflammatory carcinoma	8500-8549: ductal and lobular neoplasms	Not Brain	XI(f.6) Carcinomas of breast	Female Breast	IV	IV	IIIC	AJCC 6th ed derived from CS manual/coding instructions, v1.0	Blank(s)	Blank(s)	N/A	T4d	N1a	M1	T4d	N1a	M1	Blank(s)	Blank(s)	Blank(s)	T4d	N3
45-49 years	White	Female	2013	Los Angeles - 1992+	Not applicable (1973-2004, 2005 not Louisiana, or 2006+)	37	CA: Los Angeles Registry (06037)	Yes	Not CHSDA	Pacific Coast	California	Breast	Malignant	8.4 Carcinoma of breast	Unclassified	XI(f) Other and unspecified carcinomas	Breast	Breast	C50.9-Breast, NOS	509	8530	Malignant	Moderately differentiated; Grade II	Left - origin of primary	Positive histology	8530/3: Inflammatory carcinoma	8530/3: Inflammatory carcinoma	8500-8549: ductal and lobular neoplasms	Not Brain	XI(f.6) Carcinomas of breast	Female Breast	IIIB	IIIB	IIIB	AJCC 6th ed derived from CS manual/coding instructions, v1.0	Blank(s)	Blank(s)	N/A	T4d	N0	M0	T4d	N0	M0	Blank(s)	Blank(s)	Blank(s)	T4d	N0
35-39 years	White	Female	2014	Los Angeles - 1992+	Not applicable (1973-2004, 2005 not Louisiana, or 2006+)	37	CA: Los Angeles Registry (06037)	Yes	Not CHSDA	Pacific Coast	California	Breast	Malignant	8.4 Carcinoma of breast	Unclassified	XI(f) Other and unspecified carcinomas	Breast	Breast	C50.2-Upper-inner quadrant of breast	502	8530	Malignant	Unknown	Left - origin of primary	Positive histology	8530/3: Inflammatory carcinoma	8530/3: Inflammatory carcinoma	8500-8549: ductal and lobular neoplasms	Not Brain	XI(f.6) Carcinomas of breast	Female Breast	IIIB	IIIB	IIIB	AJCC 6th ed derived from CS manual/coding instructions, v1.0	Blank(s)	Blank(s)	N/A	T4d	N2a	M0	T4d	N2a	M0	Blank(s)	Blank(s)	Blank(s)	T4d	N2
45-49 years	White	Female	2014	Los Angeles - 1992+	Not applicable (1973-2004, 2005 not Louisiana, or 2006+)	37	CA: Los Angeles Registry (06037)	Yes	Not CHSDA	Pacific Coast	California	Breast	Malignant	8.4 Carcinoma of breast	Unclassified	XI(f) Other and unspecified carcinomas	Breast	Breast	C50.9-Breast, NOS	509	8530	Malignant	Moderately differentiated; Grade II	Right - origin of primary	Positive histology	8530/3: Inflammatory carcinoma	8530/3: Inflammatory carcinoma	8500-8549: ductal and lobular neoplasms	Not Brain	XI(f.6) Carcinomas of breast	Female Breast	IIIB	IIIB	IIIB	AJCC 6th ed derived from CS manual/coding instructions, v1.0	Blank(s)	Blank(s)	N/A	T4d	N1	M0	T4d	N1	M0	Blank(s)	Blank(s)	Blank(s)	T4d	N1
45-49 years	Black	Female	2014	Los Angeles - 1992+	Not applicable (1973-2004, 2005 not Louisiana, or 2006+)	37	CA: Los Angeles Registry (06037)	Yes	Not CHSDA	Pacific Coast	California	Breast	Malignant	8.4 Carcinoma of breast	Unclassified	XI(f) Other and unspecified carcinomas	Breast	Breast	C50.9-Breast, NOS	509	8530	Malignant	Poorly differentiated; Grade III	Left - origin of primary	Positive histology	8530/3: Inflammatory carcinoma	8530/3: Inflammatory carcinoma	8500-8549: ductal and lobular neoplasms	Not Brain	XI(f.6) Carcinomas of breast	Female Breast	IIIB	IIIB	IIIB	AJCC 6th ed derived from CS manual/coding instructions, v1.0	Blank(s)	Blank(s)	N/A	T4d	N1	M0	T4d	N1	M0	Blank(s)	Blank(s)	Blank(s)	T4d	N1
35-39 years	White	Female	2014	Los Angeles - 1992+	Not applicable (1973-2004, 2005 not Louisiana, or 2006+)	37	CA: Los Angeles Registry (06037)	Yes	Not CHSDA	Pacific Coast	California	Breast	Malignant	8.4 Carcinoma of breast	Unclassified	XI(f) Other and unspecified carcinomas	Breast	Breast	C50.9-Breast, NOS	509	8530	Malignant	Poorly differentiated; Grade III	Left - origin of primary	Positive histology	8530/3: Inflammatory carcinoma	8530/3: Inflammatory carcinoma	8500-8549: ductal and lobular neoplasms	Not Brain	XI(f.6) Carcinomas of breast	Female Breast	IV	IV	IV	AJCC 6th ed derived from CS manual/coding instructions, v1.0	Blank(s)	Blank(s)	N/A	T4d	N3c	M1	T4d	N3c	M1	Blank(s)	Blank(s)	Blank(s)	Any T, Mets	N3
50-54 years	Other (American Indian/AK Native, Asian/Pacific Islander)	Female	2014	Los Angeles - 1992+	Not applicable (1973-2004, 2005 not Louisiana, or 2006+)	37	CA: Los Angeles Registry (06037)	Yes	Not CHSDA	Pacific Coast	California	Breast	Malignant	8.4 Carcinoma of breast	Unclassified	XI(f) Other and unspecified carcinomas	Breast	Breast	C50.9-Breast, NOS	509	8530	Malignant	Poorly differentiated; Grade III	Right - origin of primary	Positive histology	8530/3: Inflammatory carcinoma	8530/3: Inflammatory carcinoma	8500-8549: ductal and lobular neoplasms	Not Brain	XI(f.6) Carcinomas of breast	Female Breast	IV	IV	IV	AJCC 6th ed derived from CS manual/coding instructions, v1.0	Blank(s)	Blank(s)	N/A	T4d	N3c	M1	T4d	N3c	M1	Blank(s)	Blank(s)	Blank(s)	Any T, Mets	N3
60-64 years	Black	Female	2014	Los Angeles - 1992+	Not applicable (1973-2004, 2005 not Louisiana, or 2006+)	37	CA: Los Angeles Registry (06037)	Yes	Not CHSDA	Pacific Coast	California	Breast	Malignant	8.4 Carcinoma of breast	Unclassified	XI(f) Other and unspecified carcinomas	Breast	Breast	C50.1-Central portion of breast	501	8530	Malignant	Poorly differentiated; Grade III	Left - origin of primary	Positive histology	8530/3: Inflammatory carcinoma	8530/3: Inflammatory carcinoma	8500-8549: ductal and lobular neoplasms	Not Brain	XI(f.6) Carcinomas of breast	Female Breast	IIIB	IIIB	IIIB	AJCC 6th ed derived from CS manual/coding instructions, v1.0	Blank(s)	Blank(s)	N/A	T4d	N1	M0	T4d	N1	M0	Blank(s)	Blank(s)	Blank(s)	T4d	N1
35-39 years	White	Female	2013	Los Angeles - 1992+	Not applicable (1973-2004, 2005 not Louisiana, or 2006+)	37	CA: Los Angeles Registry (06037)	Yes	Not CHSDA	Pacific Coast	California	Breast	Malignant	8.4 Carcinoma of breast	Unclassified	XI(f) Other and unspecified carcinomas	Breast	Breast	C50.4-Upper-outer quadrant of breast	504	8530	Malignant	Undifferentiated; anaplastic; Grade IV	Right - origin of primary	Positive histology	8530/3: Inflammatory carcinoma	8530/3: Inflammatory carcinoma	8500-8549: ductal and lobular neoplasms	Not Brain	XI(f.6) Carcinomas of breast	Female Breast	IIIB	IIIB	IIIB	AJCC 6th ed derived from CS manual/coding instructions, v1.0	Blank(s)	Blank(s)	N/A	T4d	N1	M0	T4d	N1	M0	Blank(s)	Blank(s)	Blank(s)	T4d	N1
55-59 years	Black	Female	2013	Los Angeles - 1992+	Not applicable (1973-2004, 2005 not Louisiana, or 2006+)	37	CA: Los Angeles Registry (06037)	Yes	Not CHSDA	Pacific Coast	California	Breast	Malignant	8.4 Carcinoma of breast	Unclassified	XI(f) Other and unspecified carcinomas	Breast	Breast	C50.9-Breast, NOS	509	8530	Malignant	Poorly differentiated; Grade III	Right - origin of primary	Positive histology	8530/3: Inflammatory carcinoma	8530/3: Inflammatory carcinoma	8500-8549: ductal and lobular neoplasms	Not Brain	XI(f.6) Carcinomas of breast	Female Breast	IIINOS	IIINOS	IIINOS	AJCC 6th ed derived from CS manual/coding instructions, v1.0	Blank(s)	Blank(s)	N/A	T4d	NX	M0	T4d	NX	M0	Blank(s)	Blank(s)	Blank(s)	T4d	NX Adjusted
55-59 years	White	Female	2014	Los Angeles - 1992+	Not applicable (1973-2004, 2005 not Louisiana, or 2006+)	37	CA: Los Angeles Registry (06037)	Yes	Not CHSDA	Pacific Coast	California	Breast	Malignant	8.4 Carcinoma of breast	Unclassified	XI(f) Other and unspecified carcinomas	Breast	Breast	C50.9-Breast, NOS	509	8530	Malignant	Poorly differentiated; Grade III	Left - origin of primary	Positive histology	8530/3: Inflammatory carcinoma	8530/3: Inflammatory carcinoma	8500-8549: ductal and lobular neoplasms	Not Brain	XI(f.6) Carcinomas of breast	Female Breast	IV	IV	IV	AJCC 6th ed derived from CS manual/coding instructions, v1.0	Blank(s)	Blank(s)	N/A	T4d	N1	M1	T4d	N1	M1	Blank(s)	Blank(s)	Blank(s)	Any T, Mets	N1
55-59 years	White	Female	2014	Los Angeles - 1992+	Not applicable (1973-2004, 2005 not Louisiana, or 2006+)	37	CA: Los Angeles Registry (06037)	Yes	Not CHSDA	Pacific Coast	California	Breast	Malignant	8.4 Carcinoma of breast	Unclassified	XI(f) Other and unspecified carcinomas	Breast	Breast	C50.9-Breast, NOS	509	8530	Malignant	Poorly differentiated; Grade III	Left - origin of primary	Positive histology	8530/3: Inflammatory carcinoma	8530/3: Inflammatory carcinoma	8500-8549: ductal and lobular neoplasms	Not Brain	XI(f.6) Carcinomas of breast	Female Breast	IIIB	IIIB	IIIB	AJCC 6th ed derived from CS manual/coding instructions, v1.0	Blank(s)	Blank(s)	N/A	T4d	N1	M0	T4d	N1	M0	Blank(s)	Blank(s)	Blank(s)	T4d	N1
60-64 years	White	Female	2013	Los Angeles - 1992+	Not applicable (1973-2004, 2005 not Louisiana, or 2006+)	37	CA: Los Angeles Registry (06037)	Yes	Not CHSDA	Pacific Coast	California	Breast	Malignant	8.4 Carcinoma of breast	Unclassified	XI(f) Other and unspecified carcinomas	Breast	Breast	C50.8-Overlapping lesion of breast	508	8530	Malignant	Moderately differentiated; Grade II	Right - origin of primary	Positive histology	8530/3: Inflammatory carcinoma	8530/3: Inflammatory carcinoma	8500-8549: ductal and lobular neoplasms	Not Brain	XI(f.6) Carcinomas of breast	Female Breast	IV	IV	IV	AJCC 6th ed derived from CS manual/coding instructions, v1.0	Blank(s)	Blank(s)	N/A	T4d	N1	M1	T4d	N1	M1	Blank(s)	Blank(s)	Blank(s)	Any T, Mets	N3
60-64 years	White	Female	2014	Los Angeles - 1992+	Not applicable (1973-2004, 2005 not Louisiana, or 2006+)	37	CA: Los Angeles Registry (06037)	Yes	Not CHSDA	Pacific Coast	California	Breast	Malignant	8.4 Carcinoma of breast	Unclassified	XI(f) Other and unspecified carcinomas	Breast	Breast	C50.1-Central portion of breast	501	8530	Malignant	Poorly differentiated; Grade III	Left - origin of primary	Positive histology	8530/3: Inflammatory carcinoma	8530/3: Inflammatory carcinoma	8500-8549: ductal and lobular neoplasms	Not Brain	XI(f.6) Carcinomas of breast	Female Breast	IV	IV	IIIC	AJCC 6th ed derived from CS manual/coding instructions, v1.0	Blank(s)	Blank(s)	N/A	T4d	N3a	M1	T4d	N3a	M1	Blank(s)	Blank(s)	Blank(s)	T4d	N3
50-54 years	Black	Female	2014	Los Angeles - 1992+	Not applicable (1973-2004, 2005 not Louisiana, or 2006+)	37	CA: Los Angeles Registry (06037)	Yes	Not CHSDA	Pacific Coast	California	Breast	Malignant	8.4 Carcinoma of breast	Unclassified	XI(f) Other and unspecified carcinomas	Breast	Breast	C50.1-Central portion of breast	501	8530	Malignant	Poorly differentiated; Grade III	Right - origin of primary	Positive histology	8530/3: Inflammatory carcinoma	8530/3: Inflammatory carcinoma	8500-8549: ductal and lobular neoplasms	Not Brain	XI(f.6) Carcinomas of breast	Female Breast	IV	IV	IV	AJCC 6th ed derived from CS manual/coding instructions, v1.0	Blank(s)	Blank(s)	N/A	T4d	N3a	M1	T4d	N3a	M1	Blank(s)	Blank(s)	Blank(s)	Any T, Mets	N3
55-59 years	White	Female	2014	Los Angeles - 1992+	Not applicable (1973-2004, 2005 not Louisiana, or 2006+)	37	CA: Los Angeles Registry (06037)	Yes	Not CHSDA	Pacific Coast	California	Breast	Malignant	8.4 Carcinoma of breast	Unclassified	XI(f) Other and unspecified carcinomas	Breast	Breast	C50.1-Central portion of breast	501	8530	Malignant	Poorly differentiated; Grade III	Right - origin of primary	Positive histology	8530/3: Inflammatory carcinoma	8530/3: Inflammatory carcinoma	8500-8549: ductal and lobular neoplasms	Not Brain	XI(f.6) Carcinomas of breast	Female Breast	IIINOS	UNK Stage	UNK Stage	AJCC 6th ed derived from CS manual/coding instructions, v1.0	Blank(s)	Blank(s)	N/A	T4d	NX	M0	T4d	NX	MX	Blank(s)	Blank(s)	Blank(s)	TX Adjusted	NX Adjusted
85+ years	White	Female	2014	Los Angeles - 1992+	Not applicable (1973-2004, 2005 not Louisiana, or 2006+)	37	CA: Los Angeles Registry (06037)	Yes	Not CHSDA	Pacific Coast	California	Breast	Malignant	8.4 Carcinoma of breast	Unclassified	XI(f) Other and unspecified carcinomas	Breast	Breast	C50.9-Breast, NOS	509	8530	Malignant	Poorly differentiated; Grade III	Left - origin of primary	Positive histology	8530/3: Inflammatory carcinoma	8530/3: Inflammatory carcinoma	8500-8549: ductal and lobular neoplasms	Not Brain	XI(f.6) Carcinomas of breast	Female Breast	IIIB	IIIB	IIIB	AJCC 6th ed derived from CS manual/coding instructions, v1.0	Blank(s)	Blank(s)	N/A	T4d	N0(i-)	M0	T4d	N0(i-)	M0	Blank(s)	Blank(s)	Blank(s)	T4d	N0
45-49 years	White	Female	2015	Los Angeles - 1992+	Not applicable (1973-2004, 2005 not Louisiana, or 2006+)	37	CA: Los Angeles Registry (06037)	Yes	Not CHSDA	Pacific Coast	California	Breast	Malignant	8.4 Carcinoma of breast	Unclassified	XI(f) Other and unspecified carcinomas	Breast	Breast	C50.9-Breast, NOS	509	8530	Malignant	Unknown	Right - origin of primary	Positive histology	8530/3: Inflammatory carcinoma	8530/3: Inflammatory carcinoma	8500-8549: ductal and lobular neoplasms	Not Brain	XI(f.6) Carcinomas of breast	Female Breast	IV	IV	IV	AJCC 6th ed derived from CS manual/coding instructions, v1.0	Blank(s)	Blank(s)	N/A	T4d	N0(i-)	M1	T4d	N0(i-)	M1	Blank(s)	Blank(s)	Blank(s)	Any T, Mets	N3
40-44 years	White	Female	2015	Los Angeles - 1992+	Not applicable (1973-2004, 2005 not Louisiana, or 2006+)	37	CA: Los Angeles Registry (06037)	Yes	Not CHSDA	Pacific Coast	California	Breast	Malignant	8.4 Carcinoma of breast	Unclassified	XI(f) Other and unspecified carcinomas	Breast	Breast	C50.5-Lower-outer quadrant of breast	505	8530	Malignant	Moderately differentiated; Grade II	Left - origin of primary	Positive histology	8530/3: Inflammatory carcinoma	8530/3: Inflammatory carcinoma	8500-8549: ductal and lobular neoplasms	Not Brain	XI(f.6) Carcinomas of breast	Female Breast	IIIB	IIIB	IIIB	AJCC 6th ed derived from CS manual/coding instructions, v1.0	Blank(s)	Blank(s)	N/A	T4d	N1	M0	T4d	N1	M0	Blank(s)	Blank(s)	Blank(s)	T4d	N1
55-59 years	White	Female	2014	Los Angeles - 1992+	Not applicable (1973-2004, 2005 not Louisiana, or 2006+)	37	CA: Los Angeles Registry (06037)	Yes	Not CHSDA	Pacific Coast	California	Breast	Malignant	8.4 Carcinoma of breast	Unclassified	XI(f) Other and unspecified carcinomas	Breast	Breast	C50.1-Central portion of breast	501	8530	Malignant	Moderately differentiated; Grade II	Left - origin of primary	Positive histology	8530/3: Inflammatory carcinoma	8530/3: Inflammatory carcinoma	8500-8549: ductal and lobular neoplasms	Not Brain	XI(f.6) Carcinomas of breast	Female Breast	IIIB	IIIB	IIIB	AJCC 6th ed derived from CS manual/coding instructions, v1.0	Blank(s)	Blank(s)	N/A	T4d	N1a	M0	T4d	N1a	M0	Blank(s)	Blank(s)	Blank(s)	T4d	N1
75-79 years	White	Female	2015	Los Angeles - 1992+	Not applicable (1973-2004, 2005 not Louisiana, or 2006+)	37	CA: Los Angeles Registry (06037)	Yes	Not CHSDA	Pacific Coast	California	Breast	Malignant	8.4 Carcinoma of breast	Unclassified	XI(f) Other and unspecified carcinomas	Breast	Breast	C50.4-Upper-outer quadrant of breast	504	8530	Malignant	Unknown	Right - origin of primary	Positive histology	8530/3: Inflammatory carcinoma	8530/3: Inflammatory carcinoma	8500-8549: ductal and lobular neoplasms	Not Brain	XI(f.6) Carcinomas of breast	Female Breast	IIIB	IIIB	IIIB	AJCC 6th ed derived from CS manual/coding instructions, v1.0	Blank(s)	Blank(s)	N/A	T4d	N0	M0	T4d	N0	M0	Blank(s)	Blank(s)	Blank(s)	T4d	N0
80-84 years	White	Female	2015	Los Angeles - 1992+	Not applicable (1973-2004, 2005 not Louisiana, or 2006+)	37	CA: Los Angeles Registry (06037)	Yes	Not CHSDA	Pacific Coast	California	Breast	Malignant	8.4 Carcinoma of breast	Unclassified	XI(f) Other and unspecified carcinomas	Breast	Breast	C50.8-Overlapping lesion of breast	508	8530	Malignant	Poorly differentiated; Grade III	Left - origin of primary	Positive histology	8530/3: Inflammatory carcinoma	8530/3: Inflammatory carcinoma	8500-8549: ductal and lobular neoplasms	Not Brain	XI(f.6) Carcinomas of breast	Female Breast	IIIB	IIIB	IIIB	AJCC 6th ed derived from CS manual/coding instructions, v1.0	Blank(s)	Blank(s)	N/A	T4d	N1	M0	T4d	N1	M0	Blank(s)	Blank(s)	Blank(s)	T4d	N1
50-54 years	Black	Female	2014	Los Angeles - 1992+	Not applicable (1973-2004, 2005 not Louisiana, or 2006+)	37	CA: Los Angeles Registry (06037)	Yes	Not CHSDA	Pacific Coast	California	Breast	Malignant	8.4 Carcinoma of breast	Unclassified	XI(f) Other and unspecified carcinomas	Breast	Breast	C50.9-Breast, NOS	509	8530	Malignant	Well differentiated; Grade I	Left - origin of primary	Positive histology	8530/3: Inflammatory carcinoma	8530/3: Inflammatory carcinoma	8500-8549: ductal and lobular neoplasms	Not Brain	XI(f.6) Carcinomas of breast	Female Breast	IV	IV	IV	AJCC 6th ed derived from CS manual/coding instructions, v1.0	Blank(s)	Blank(s)	N/A	T4d	N2a	M1	T4d	N2a	M1	Blank(s)	Blank(s)	Blank(s)	Any T, Mets	N2
55-59 years	White	Female	2012	Los Angeles - 1992+	Not applicable (1973-2004, 2005 not Louisiana, or 2006+)	37	CA: Los Angeles Registry (06037)	Yes	Not CHSDA	Pacific Coast	California	Breast	Malignant	8.4 Carcinoma of breast	Unclassified	XI(f) Other and unspecified carcinomas	Breast	Breast	C50.9-Breast, NOS	509	8530	Malignant	Unknown	Left - origin of primary	Positive histology	8530/3: Inflammatory carcinoma	8530/3: Inflammatory carcinoma	8500-8549: ductal and lobular neoplasms	Not Brain	XI(f.6) Carcinomas of breast	Female Breast	IIIC	IIIC	IIIC	AJCC 6th ed derived from CS manual/coding instructions, v1.0	Blank(s)	Blank(s)	N/A	T4d	N3b	M0	T4d	N3b	M0	Blank(s)	Blank(s)	Blank(s)	T4d	N3
40-44 years	Other (American Indian/AK Native, Asian/Pacific Islander)	Female	2012	Los Angeles - 1992+	Not applicable (1973-2004, 2005 not Louisiana, or 2006+)	37	CA: Los Angeles Registry (06037)	Yes	Not CHSDA	Pacific Coast	California	Breast	Malignant	8.4 Carcinoma of breast	Unclassified	XI(f) Other and unspecified carcinomas	Breast	Breast	C50.9-Breast, NOS	509	8530	Malignant	Unknown	Right - origin of primary	Positive histology	8530/3: Inflammatory carcinoma	8530/3: Inflammatory carcinoma	8500-8549: ductal and lobular neoplasms	Not Brain	XI(f.6) Carcinomas of breast	Female Breast	IIIC	IIIC	IIIC	AJCC 6th ed derived from CS manual/coding instructions, v1.0	Blank(s)	Blank(s)	N/A	T4d	N3a	M0	T4d	N3a	M0	Blank(s)	Blank(s)	Blank(s)	T4d	N3
45-49 years	White	Female	2015	Los Angeles - 1992+	Not applicable (1973-2004, 2005 not Louisiana, or 2006+)	37	CA: Los Angeles Registry (06037)	Yes	Not CHSDA	Pacific Coast	California	Breast	Malignant	8.4 Carcinoma of breast	Unclassified	XI(f) Other and unspecified carcinomas	Breast	Breast	C50.9-Breast, NOS	509	8530	Malignant	Moderately differentiated; Grade II	Left - origin of primary	Positive histology	8530/3: Inflammatory carcinoma	8530/3: Inflammatory carcinoma	8500-8549: ductal and lobular neoplasms	Not Brain	XI(f.6) Carcinomas of breast	Female Breast	IV	IV	IV	AJCC 6th ed derived from CS manual/coding instructions, v1.0	Blank(s)	Blank(s)	N/A	T4d	N0	M1	T4d	N0	M1	Blank(s)	Blank(s)	Blank(s)	Any T, Mets	N0
50-54 years	Other (American Indian/AK Native, Asian/Pacific Islander)	Female	2014	Los Angeles - 1992+	Not applicable (1973-2004, 2005 not Louisiana, or 2006+)	37	CA: Los Angeles Registry (06037)	Yes	Not CHSDA	Pacific Coast	California	Breast	Malignant	8.4 Carcinoma of breast	Unclassified	XI(f) Other and unspecified carcinomas	Breast	Breast	C50.9-Breast, NOS	509	8530	Malignant	Unknown	Right - origin of primary	Positive histology	8530/3: Inflammatory carcinoma	8530/3: Inflammatory carcinoma	8500-8549: ductal and lobular neoplasms	Not Brain	XI(f.6) Carcinomas of breast	Female Breast	IIIB	IIIB	IIIB	AJCC 6th ed derived from CS manual/coding instructions, v1.0	Blank(s)	Blank(s)	N/A	T4d	N0	M0	T4d	N0	M0	Blank(s)	Blank(s)	Blank(s)	T4d	N0
65-69 years	White	Female	2015	Los Angeles - 1992+	Not applicable (1973-2004, 2005 not Louisiana, or 2006+)	37	CA: Los Angeles Registry (06037)	Yes	Not CHSDA	Pacific Coast	California	Breast	Malignant	8.4 Carcinoma of breast	Unclassified	XI(f) Other and unspecified carcinomas	Breast	Breast	C50.9-Breast, NOS	509	8530	Malignant	Poorly differentiated; Grade III	Right - origin of primary	Positive histology	8530/3: Inflammatory carcinoma	8530/3: Inflammatory carcinoma	8500-8549: ductal and lobular neoplasms	Not Brain	XI(f.6) Carcinomas of breast	Female Breast	IIIC	UNK Stage	UNK Stage	AJCC 6th ed derived from CS manual/coding instructions, v1.0	Blank(s)	Blank(s)	N/A	T4d	N3NOS	M0	T4d	N3NOS	MX	Blank(s)	Blank(s)	Blank(s)	TX Adjusted	NX Adjusted
75-79 years	Black	Female	2015	Los Angeles - 1992+	Not applicable (1973-2004, 2005 not Louisiana, or 2006+)	37	CA: Los Angeles Registry (06037)	Yes	Not CHSDA	Pacific Coast	California	Breast	Malignant	8.4 Carcinoma of breast	Unclassified	XI(f) Other and unspecified carcinomas	Breast	Breast	C50.8-Overlapping lesion of breast	508	8530	Malignant	Poorly differentiated; Grade III	Right - origin of primary	Positive histology	8530/3: Inflammatory carcinoma	8530/3: Inflammatory carcinoma	8500-8549: ductal and lobular neoplasms	Not Brain	XI(f.6) Carcinomas of breast	Female Breast	IIIB	IIIB	IIIB	AJCC 6th ed derived from CS manual/coding instructions, v1.0	Blank(s)	Blank(s)	N/A	T4d	N2a	M0	T4d	N2a	M0	Blank(s)	Blank(s)	Blank(s)	T4d	N2
55-59 years	White	Female	2015	Los Angeles - 1992+	Not applicable (1973-2004, 2005 not Louisiana, or 2006+)	37	CA: Los Angeles Registry (06037)	Yes	Not CHSDA	Pacific Coast	California	Breast	Malignant	8.4 Carcinoma of breast	Unclassified	XI(f) Other and unspecified carcinomas	Breast	Breast	C50.9-Breast, NOS	509	8530	Malignant	Unknown	Right - origin of primary	Positive histology	8530/3: Inflammatory carcinoma	8530/3: Inflammatory carcinoma	8500-8549: ductal and lobular neoplasms	Not Brain	XI(f.6) Carcinomas of breast	Female Breast	IV	IV	IV	AJCC 6th ed derived from CS manual/coding instructions, v1.0	Blank(s)	Blank(s)	N/A	T4d	NX	M1	T4d	NX	M1	Blank(s)	Blank(s)	Blank(s)	Any T, Mets	NX Adjusted
70-74 years	White	Female	2013	Los Angeles - 1992+	Not applicable (1973-2004, 2005 not Louisiana, or 2006+)	37	CA: Los Angeles Registry (06037)	Yes	Not CHSDA	Pacific Coast	California	Breast	Malignant	8.4 Carcinoma of breast	Unclassified	XI(f) Other and unspecified carcinomas	Breast	Breast	C50.9-Breast, NOS	509	8530	Malignant	Unknown	Left - origin of primary	Positive histology	8530/3: Inflammatory carcinoma	8530/3: Inflammatory carcinoma	8500-8549: ductal and lobular neoplasms	Not Brain	XI(f.6) Carcinomas of breast	Female Breast	IIIC	IIIC	IIIC	AJCC 6th ed derived from CS manual/coding instructions, v1.0	Blank(s)	Blank(s)	N/A	T4d	N3a	M0	T4d	N3a	M0	Blank(s)	Blank(s)	Blank(s)	T4d	N3
70-74 years	White	Female	2015	Los Angeles - 1992+	Not applicable (1973-2004, 2005 not Louisiana, or 2006+)	37	CA: Los Angeles Registry (06037)	Yes	Not CHSDA	Pacific Coast	California	Breast	Malignant	8.4 Carcinoma of breast	Unclassified	XI(f) Other and unspecified carcinomas	Breast	Breast	C50.9-Breast, NOS	509	8530	Malignant	Poorly differentiated; Grade III	Left - origin of primary	Positive histology	8530/3: Inflammatory carcinoma	8530/3: Inflammatory carcinoma	8500-8549: ductal and lobular neoplasms	Not Brain	XI(f.6) Carcinomas of breast	Female Breast	IIIC	IIIC	IIIC	AJCC 6th ed derived from CS manual/coding instructions, v1.0	Blank(s)	Blank(s)	N/A	T4d	N3c	M0	T4d	N3c	M0	Blank(s)	Blank(s)	Blank(s)	T4d	N3
45-49 years	White	Female	2015	Los Angeles - 1992+	Not applicable (1973-2004, 2005 not Louisiana, or 2006+)	37	CA: Los Angeles Registry (06037)	Yes	Not CHSDA	Pacific Coast	California	Breast	Malignant	8.4 Carcinoma of breast	Unclassified	XI(f) Other and unspecified carcinomas	Breast	Breast	C50.9-Breast, NOS	509	8530	Malignant	Unknown	Left - origin of primary	Positive histology	8530/3: Inflammatory carcinoma	8530/3: Inflammatory carcinoma	8500-8549: ductal and lobular neoplasms	Not Brain	XI(f.6) Carcinomas of breast	Female Breast	IV	IV	IV	AJCC 6th ed derived from CS manual/coding instructions, v1.0	Blank(s)	Blank(s)	N/A	T4d	N3c	M1	T4d	N3c	M1	Blank(s)	Blank(s)	Blank(s)	Any T, Mets	N3
40-44 years	Black	Female	2014	Los Angeles - 1992+	Not applicable (1973-2004, 2005 not Louisiana, or 2006+)	37	CA: Los Angeles Registry (06037)	Yes	Not CHSDA	Pacific Coast	California	Breast	Malignant	8.4 Carcinoma of breast	Unclassified	XI(f) Other and unspecified carcinomas	Breast	Breast	C50.8-Overlapping lesion of breast	508	8530	Malignant	Moderately differentiated; Grade II	Right - origin of primary	Positive histology	8530/3: Inflammatory carcinoma	8530/3: Inflammatory carcinoma	8500-8549: ductal and lobular neoplasms	Not Brain	XI(f.6) Carcinomas of breast	Female Breast	IV	IV	IV	AJCC 6th ed derived from CS manual/coding instructions, v1.0	Blank(s)	Blank(s)	N/A	T4d	N1	M1	T4d	N1	M1	Blank(s)	Blank(s)	Blank(s)	Any T, Mets	N1
85+ years	White	Female	2015	Los Angeles - 1992+	Not applicable (1973-2004, 2005 not Louisiana, or 2006+)	37	CA: Los Angeles Registry (06037)	Yes	Not CHSDA	Pacific Coast	California	Breast	Malignant	8.4 Carcinoma of breast	Unclassified	XI(f) Other and unspecified carcinomas	Breast	Breast	C50.4-Upper-outer quadrant of breast	504	8530	Malignant	Moderately differentiated; Grade II	Left - origin of primary	Positive histology	8530/3: Inflammatory carcinoma	8530/3: Inflammatory carcinoma	8500-8549: ductal and lobular neoplasms	Not Brain	XI(f.6) Carcinomas of breast	Female Breast	IIIB	IIIB	IIIB	AJCC 6th ed derived from CS manual/coding instructions, v1.0	Blank(s)	Blank(s)	N/A	T4d	N2NOS	M0	T4d	N2NOS	M0	Blank(s)	Blank(s)	Blank(s)	T4d	N2
35-39 years	White	Female	2015	Los Angeles - 1992+	Not applicable (1973-2004, 2005 not Louisiana, or 2006+)	37	CA: Los Angeles Registry (06037)	Yes	Not CHSDA	Pacific Coast	California	Breast	Malignant	8.4 Carcinoma of breast	Unclassified	XI(f) Other and unspecified carcinomas	Breast	Breast	C50.8-Overlapping lesion of breast	508	8530	Malignant	Poorly differentiated; Grade III	Left - origin of primary	Positive histology	8530/3: Inflammatory carcinoma	8530/3: Inflammatory carcinoma	8500-8549: ductal and lobular neoplasms	Not Brain	XI(f.6) Carcinomas of breast	Female Breast	IIIC	IIIC	IIIC	AJCC 6th ed derived from CS manual/coding instructions, v1.0	Blank(s)	Blank(s)	N/A	T4d	N3a	M0	T4d	N3a	M0	Blank(s)	Blank(s)	Blank(s)	T4d	N3
65-69 years	White	Female	2015	Los Angeles - 1992+	Not applicable (1973-2004, 2005 not Louisiana, or 2006+)	37	CA: Los Angeles Registry (06037)	Yes	Not CHSDA	Pacific Coast	California	Breast	Malignant	8.4 Carcinoma of breast	Unclassified	XI(f) Other and unspecified carcinomas	Breast	Breast	C50.5-Lower-outer quadrant of breast	505	8530	Malignant	Moderately differentiated; Grade II	Right - origin of primary	Positive histology	8530/3: Inflammatory carcinoma	8530/3: Inflammatory carcinoma	8500-8549: ductal and lobular neoplasms	Not Brain	XI(f.6) Carcinomas of breast	Female Breast	IV	IV	IV	AJCC 6th ed derived from CS manual/coding instructions, v1.0	Blank(s)	Blank(s)	N/A	T4d	N0	M1	T4d	N0	M1	Blank(s)	Blank(s)	Blank(s)	Any T, Mets	N0
50-54 years	White	Female	2015	Los Angeles - 1992+	Not applicable (1973-2004, 2005 not Louisiana, or 2006+)	37	CA: Los Angeles Registry (06037)	Yes	Not CHSDA	Pacific Coast	California	Breast	Malignant	8.4 Carcinoma of breast	Unclassified	XI(f) Other and unspecified carcinomas	Breast	Breast	C50.9-Breast, NOS	509	8530	Malignant	Poorly differentiated; Grade III	Left - origin of primary	Positive histology	8530/3: Inflammatory carcinoma	8530/3: Inflammatory carcinoma	8500-8549: ductal and lobular neoplasms	Not Brain	XI(f.6) Carcinomas of breast	Female Breast	IIIB	IIIB	IIIB	AJCC 6th ed derived from CS manual/coding instructions, v1.0	Blank(s)	Blank(s)	N/A	T4d	N1a	M0	T4d	N1a	M0	Blank(s)	Blank(s)	Blank(s)	T4d	N1
85+ years	Other (American Indian/AK Native, Asian/Pacific Islander)	Female	2014	Los Angeles - 1992+	Not applicable (1973-2004, 2005 not Louisiana, or 2006+)	37	CA: Los Angeles Registry (06037)	Yes	Not CHSDA	Pacific Coast	California	Breast	Malignant	8.4 Carcinoma of breast	Unclassified	XI(f) Other and unspecified carcinomas	Breast	Breast	C50.9-Breast, NOS	509	8530	Malignant	Poorly differentiated; Grade III	Right - origin of primary	Positive histology	8530/3: Inflammatory carcinoma	8530/3: Inflammatory carcinoma	8500-8549: ductal and lobular neoplasms	Not Brain	XI(f.6) Carcinomas of breast	Female Breast	IIINOS	UNK Stage	UNK Stage	AJCC 6th ed derived from CS manual/coding instructions, v1.0	Blank(s)	Blank(s)	N/A	T4d	NX	M0	T4d	NX	MX	Blank(s)	Blank(s)	Blank(s)	TX Adjusted	NX Adjusted
50-54 years	Other (American Indian/AK Native, Asian/Pacific Islander)	Female	2015	Los Angeles - 1992+	Not applicable (1973-2004, 2005 not Louisiana, or 2006+)	37	CA: Los Angeles Registry (06037)	Yes	Not CHSDA	Pacific Coast	California	Breast	Malignant	8.4 Carcinoma of breast	Unclassified	XI(f) Other and unspecified carcinomas	Breast	Breast	C50.9-Breast, NOS	509	8530	Malignant	Poorly differentiated; Grade III	Right - origin of primary	Positive histology	8530/3: Inflammatory carcinoma	8530/3: Inflammatory carcinoma	8500-8549: ductal and lobular neoplasms	Not Brain	XI(f.6) Carcinomas of breast	Female Breast	IIIC	IIIC	IIIC	AJCC 6th ed derived from CS manual/coding instructions, v1.0	Blank(s)	Blank(s)	N/A	T4d	N3a	M0	T4d	N3a	M0	Blank(s)	Blank(s)	Blank(s)	T4d	N3
50-54 years	Other (American Indian/AK Native, Asian/Pacific Islander)	Female	2015	Los Angeles - 1992+	Not applicable (1973-2004, 2005 not Louisiana, or 2006+)	37	CA: Los Angeles Registry (06037)	Yes	Not CHSDA	Pacific Coast	California	Breast	Malignant	8.4 Carcinoma of breast	Unclassified	XI(f) Other and unspecified carcinomas	Breast	Breast	C50.9-Breast, NOS	509	8530	Malignant	Poorly differentiated; Grade III	Right - origin of primary	Positive histology	8530/3: Inflammatory carcinoma	8530/3: Inflammatory carcinoma	8500-8549: ductal and lobular neoplasms	Not Brain	XI(f.6) Carcinomas of breast	Female Breast	IIIB	IIIB	IIIB	AJCC 6th ed derived from CS manual/coding instructions, v1.0	Blank(s)	Blank(s)	N/A	T4d	N1	M0	T4d	N1	M0	Blank(s)	Blank(s)	Blank(s)	T4d	N1
70-74 years	Other (American Indian/AK Native, Asian/Pacific Islander)	Female	2011	Alaska Natives - 1992+	Not applicable (1973-2004, 2005 not Louisiana, or 2006+)	900	AK: Alaska Natives Registry (02900)	Yes	CHSDA	Alaska	Alaska	Breast	Malignant	8.4 Carcinoma of breast	Unclassified	XI(f) Other and unspecified carcinomas	Breast	Breast	C50.4-Upper-outer quadrant of breast	504	8530	Malignant	Moderately differentiated; Grade II	Right - origin of primary	Positive histology	8530/3: Inflammatory carcinoma	8530/3: Inflammatory carcinoma	8500-8549: ductal and lobular neoplasms	Not Brain	XI(f.6) Carcinomas of breast	Female Breast	IIIB	IIIB	IIIB	AJCC 6th ed derived from CS manual/coding instructions, v1.0	Blank(s)	Blank(s)	N/A	T4d	N2a	M0	T4d	N2a	M0	Blank(s)	Blank(s)	Blank(s)	T4d	N2
45-49 years	Other (American Indian/AK Native, Asian/Pacific Islander)	Female	2012	Alaska Natives - 1992+	Not applicable (1973-2004, 2005 not Louisiana, or 2006+)	900	AK: Alaska Natives Registry (02900)	Yes	CHSDA	Alaska	Alaska	Breast	Malignant	8.4 Carcinoma of breast	Unclassified	XI(f) Other and unspecified carcinomas	Breast	Breast	C50.4-Upper-outer quadrant of breast	504	8530	Malignant	Poorly differentiated; Grade III	Left - origin of primary	Positive histology	8530/3: Inflammatory carcinoma	8530/3: Inflammatory carcinoma	8500-8549: ductal and lobular neoplasms	Not Brain	XI(f.6) Carcinomas of breast	Female Breast	IIIB	IIIB	IIIB	AJCC 6th ed derived from CS manual/coding instructions, v1.0	Blank(s)	Blank(s)	N/A	T4d	N1NOS	M0	T4d	N1NOS	M0	Blank(s)	Blank(s)	Blank(s)	T4d	N1
50-54 years	White	Female	2012	California excluding SF/SJM/LA - 2000+	Not applicable (1973-2004, 2005 not Louisiana, or 2006+)	19	CA: Fresno County (06019)	Yes	CHSDA	Pacific Coast	California	Breast	Malignant	8.4 Carcinoma of breast	Unclassified	XI(f) Other and unspecified carcinomas	Breast	Breast	C50.5-Lower-outer quadrant of breast	505	8530	Malignant	Poorly differentiated; Grade III	Right - origin of primary	Positive histology	8530/3: Inflammatory carcinoma	8530/3: Inflammatory carcinoma	8500-8549: ductal and lobular neoplasms	Not Brain	XI(f.6) Carcinomas of breast	Female Breast	IV	IV	IV	AJCC 6th ed derived from CS manual/coding instructions, v1.0	Blank(s)	Blank(s)	N/A	T4d	N1mi	M1	T4d	N1mi	M1	Blank(s)	Blank(s)	Blank(s)	Any T, Mets	N1
70-74 years	White	Female	2011	California excluding SF/SJM/LA - 2000+	Not applicable (1973-2004, 2005 not Louisiana, or 2006+)	109	CA: Tuolumne County (06109)	Yes	CHSDA	Pacific Coast	California	Breast	Malignant	8.4 Carcinoma of breast	Unclassified	XI(f) Other and unspecified carcinomas	Breast	Breast	C50.9-Breast, NOS	509	8530	Malignant	Unknown	Right - origin of primary	Positive histology	8530/3: Inflammatory carcinoma	8530/3: Inflammatory carcinoma	8500-8549: ductal and lobular neoplasms	Not Brain	XI(f.6) Carcinomas of breast	Female Breast	IV	IV	IV	AJCC 6th ed derived from CS manual/coding instructions, v1.0	Blank(s)	Blank(s)	N/A	T4d	N0(i-)	M1	T4d	N0(i-)	M1	Blank(s)	Blank(s)	Blank(s)	Any T, Mets	N0
60-64 years	White	Female	2011	California excluding SF/SJM/LA - 2000+	Not applicable (1973-2004, 2005 not Louisiana, or 2006+)	77	CA: San Joaquin County (06077)	Yes	Not CHSDA	Pacific Coast	California	Breast	Malignant	8.4 Carcinoma of breast	Unclassified	XI(f) Other and unspecified carcinomas	Breast	Breast	C50.9-Breast, NOS	509	8530	Malignant	Poorly differentiated; Grade III	Right - origin of primary	Positive histology	8530/3: Inflammatory carcinoma	8530/3: Inflammatory carcinoma	8500-8549: ductal and lobular neoplasms	Not Brain	XI(f.6) Carcinomas of breast	Female Breast	IIIB	IIIB	IIIB	AJCC 6th ed derived from CS manual/coding instructions, v1.0	Blank(s)	Blank(s)	N/A	T4d	N0	M0	T4d	N0	M0	Blank(s)	Blank(s)	Blank(s)	T4d	N0
65-69 years	White	Female	2011	California excluding SF/SJM/LA - 2000+	Not applicable (1973-2004, 2005 not Louisiana, or 2006+)	111	CA: Ventura County (06111)	Yes	Not CHSDA	Pacific Coast	California	Breast	Malignant	8.4 Carcinoma of breast	Unclassified	XI(f) Other and unspecified carcinomas	Breast	Breast	C50.9-Breast, NOS	509	8530	Malignant	Poorly differentiated; Grade III	Left - origin of primary	Positive histology	8530/3: Inflammatory carcinoma	8530/3: Inflammatory carcinoma	8500-8549: ductal and lobular neoplasms	Not Brain	XI(f.6) Carcinomas of breast	Female Breast	IIINOS	IIINOS	IIINOS	AJCC 6th ed derived from CS manual/coding instructions, v1.0	Blank(s)	Blank(s)	N/A	T4d	NX	M0	T4d	NX	M0	Blank(s)	Blank(s)	Blank(s)	T4d	NX Adjusted
45-49 years	White	Female	2012	California excluding SF/SJM/LA - 2000+	Not applicable (1973-2004, 2005 not Louisiana, or 2006+)	71	CA: San Bernardino County (06071)	Yes	CHSDA	Pacific Coast	California	Breast	Malignant	8.4 Carcinoma of breast	Unclassified	XI(f) Other and unspecified carcinomas	Breast	Breast	C50.8-Overlapping lesion of breast	508	8530	Malignant	Poorly differentiated; Grade III	Left - origin of primary	Positive histology	8530/3: Inflammatory carcinoma	8530/3: Inflammatory carcinoma	8500-8549: ductal and lobular neoplasms	Not Brain	XI(f.6) Carcinomas of breast	Female Breast	IIIB	IIIB	IIIB	AJCC 6th ed derived from CS manual/coding instructions, v1.0	Blank(s)	Blank(s)	N/A	T4d	N2a	M0	T4d	N2a	M0	Blank(s)	Blank(s)	Blank(s)	T4d	N2
65-69 years	White	Female	2012	California excluding SF/SJM/LA - 2000+	Not applicable (1973-2004, 2005 not Louisiana, or 2006+)	73	CA: San Diego County (06073)	Yes	CHSDA	Pacific Coast	California	Breast	Malignant	8.4 Carcinoma of breast	Unclassified	XI(f) Other and unspecified carcinomas	Breast	Breast	C50.9-Breast, NOS	509	8530	Malignant	Moderately differentiated; Grade II	Bilateral, single primary	Positive histology	8530/3: Inflammatory carcinoma	8530/3: Inflammatory carcinoma	8500-8549: ductal and lobular neoplasms	Not Brain	XI(f.6) Carcinomas of breast	Female Breast	IIIB	IIIB	IIIB	AJCC 6th ed derived from CS manual/coding instructions, v1.0	Blank(s)	Blank(s)	N/A	T4d	N1NOS	M0	T4d	N1NOS	M0	Blank(s)	Blank(s)	Blank(s)	T4d	N1
85+ years	White	Female	2012	California excluding SF/SJM/LA - 2000+	Not applicable (1973-2004, 2005 not Louisiana, or 2006+)	111	CA: Ventura County (06111)	Yes	Not CHSDA	Pacific Coast	California	Breast	Malignant	8.4 Carcinoma of breast	Unclassified	XI(f) Other and unspecified carcinomas	Breast	Breast	C50.9-Breast, NOS	509	8530	Malignant	Poorly differentiated; Grade III	Left - origin of primary	Positive histology	8530/3: Inflammatory carcinoma	8530/3: Inflammatory carcinoma	8500-8549: ductal and lobular neoplasms	Not Brain	XI(f.6) Carcinomas of breast	Female Breast	IV	IV	IV	AJCC 6th ed derived from CS manual/coding instructions, v1.0	Blank(s)	Blank(s)	N/A	T4d	N2b	M1	T4d	N2b	M1	Blank(s)	Blank(s)	Blank(s)	Any T, Mets	N3
85+ years	White	Female	2011	California excluding SF/SJM/LA - 2000+	Not applicable (1973-2004, 2005 not Louisiana, or 2006+)	59	CA: Orange County (06059)	Yes	Not CHSDA	Pacific Coast	California	Breast	Malignant	8.4 Carcinoma of breast	Unclassified	XI(f) Other and unspecified carcinomas	Breast	Breast	C50.3-Lower-inner quadrant of breast	503	8530	Malignant	Unknown	Left - origin of primary	Positive histology	8530/3: Inflammatory carcinoma	8530/3: Inflammatory carcinoma	8500-8549: ductal and lobular neoplasms	Not Brain	XI(f.6) Carcinomas of breast	Female Breast	IIIB	IIIB	IIIB	AJCC 6th ed derived from CS manual/coding instructions, v1.0	Blank(s)	Blank(s)	N/A	T4d	N1a	M0	T4d	N1a	M0	Blank(s)	Blank(s)	Blank(s)	T4d	N1
70-74 years	White	Female	2011	California excluding SF/SJM/LA - 2000+	Not applicable (1973-2004, 2005 not Louisiana, or 2006+)	73	CA: San Diego County (06073)	Yes	CHSDA	Pacific Coast	California	Breast	Malignant	8.4 Carcinoma of breast	Unclassified	XI(f) Other and unspecified carcinomas	Breast	Breast	C50.9-Breast, NOS	509	8530	Malignant	Poorly differentiated; Grade III	Right - origin of primary	Positive histology	8530/3: Inflammatory carcinoma	8530/3: Inflammatory carcinoma	8500-8549: ductal and lobular neoplasms	Not Brain	XI(f.6) Carcinomas of breast	Female Breast	IV	IV	IV	AJCC 6th ed derived from CS manual/coding instructions, v1.0	Blank(s)	Blank(s)	N/A	T4d	N1a	M1	T4d	N1a	M1	Blank(s)	Blank(s)	Blank(s)	Any T, Mets	N1
60-64 years	White	Female	2010	California excluding SF/SJM/LA - 2000+	Not applicable (1973-2004, 2005 not Louisiana, or 2006+)	73	CA: San Diego County (06073)	Yes	CHSDA	Pacific Coast	California	Breast	Malignant	8.4 Carcinoma of breast	Unclassified	XI(f) Other and unspecified carcinomas	Breast	Breast	C50.9-Breast, NOS	509	8530	Malignant	Unknown	Left - origin of primary	Positive histology	8530/3: Inflammatory carcinoma	8530/3: Inflammatory carcinoma	8500-8549: ductal and lobular neoplasms	Not Brain	XI(f.6) Carcinomas of breast	Female Breast	IIINOS	IIINOS	IIINOS	AJCC 6th ed derived from CS manual/coding instructions, v1.0	Blank(s)	Blank(s)	N/A	T4d	NX	M0	T4d	NX	M0	Blank(s)	Blank(s)	Blank(s)	T4d	NX Adjusted
55-59 years	White	Female	2012	California excluding SF/SJM/LA - 2000+	Not applicable (1973-2004, 2005 not Louisiana, or 2006+)	59	CA: Orange County (06059)	Yes	Not CHSDA	Pacific Coast	California	Breast	Malignant	8.4 Carcinoma of breast	Unclassified	XI(f) Other and unspecified carcinomas	Breast	Breast	C50.9-Breast, NOS	509	8530	Malignant	Moderately differentiated; Grade II	Left - origin of primary	Positive histology	8530/3: Inflammatory carcinoma	8530/3: Inflammatory carcinoma	8500-8549: ductal and lobular neoplasms	Not Brain	XI(f.6) Carcinomas of breast	Female Breast	IIIB	IIIB	IIIB	AJCC 6th ed derived from CS manual/coding instructions, v1.0	Blank(s)	Blank(s)	N/A	T4d	N0	M0	T4d	N0	M0	Blank(s)	Blank(s)	Blank(s)	T4d	N0
65-69 years	Black	Female	2013	California excluding SF/SJM/LA - 2000+	Not applicable (1973-2004, 2005 not Louisiana, or 2006+)	67	CA: Sacramento County (06067)	Yes	Not CHSDA	Pacific Coast	California	Breast	Malignant	8.4 Carcinoma of breast	Unclassified	XI(f) Other and unspecified carcinomas	Breast	Breast	C50.9-Breast, NOS	509	8530	Malignant	Poorly differentiated; Grade III	Left - origin of primary	Positive histology	8530/3: Inflammatory carcinoma	8530/3: Inflammatory carcinoma	8500-8549: ductal and lobular neoplasms	Not Brain	XI(f.6) Carcinomas of breast	Female Breast	IIIC	IIIC	IIIC	AJCC 6th ed derived from CS manual/coding instructions, v1.0	Blank(s)	Blank(s)	N/A	T4d	N3c	M0	T4d	N3c	M0	Blank(s)	Blank(s)	Blank(s)	T4d	N3
45-49 years	White	Female	2013	California excluding SF/SJM/LA - 2000+	Not applicable (1973-2004, 2005 not Louisiana, or 2006+)	95	CA: Solano County (06095)	Yes	Not CHSDA	Pacific Coast	California	Breast	Malignant	8.4 Carcinoma of breast	Unclassified	XI(f) Other and unspecified carcinomas	Breast	Breast	C50.8-Overlapping lesion of breast	508	8530	Malignant	Unknown	Left - origin of primary	Positive histology	8530/3: Inflammatory carcinoma	8530/3: Inflammatory carcinoma	8500-8549: ductal and lobular neoplasms	Not Brain	XI(f.6) Carcinomas of breast	Female Breast	IIIC	IIIC	IIIC	AJCC 6th ed derived from CS manual/coding instructions, v1.0	Blank(s)	Blank(s)	N/A	T4d	N3a	M0	T4d	N3a	M0	Blank(s)	Blank(s)	Blank(s)	T4d	N3
80-84 years	White	Female	2013	California excluding SF/SJM/LA - 2000+	Not applicable (1973-2004, 2005 not Louisiana, or 2006+)	59	CA: Orange County (06059)	Yes	Not CHSDA	Pacific Coast	California	Breast	Malignant	8.4 Carcinoma of breast	Unclassified	XI(f) Other and unspecified carcinomas	Breast	Breast	C50.1-Central portion of breast	501	8530	Malignant	Undifferentiated; anaplastic; Grade IV	Left - origin of primary	Positive histology	8530/3: Inflammatory carcinoma	8530/3: Inflammatory carcinoma	8500-8549: ductal and lobular neoplasms	Not Brain	XI(f.6) Carcinomas of breast	Female Breast	IV	IV	IIIC	AJCC 6th ed derived from CS manual/coding instructions, v1.0	Blank(s)	Blank(s)	N/A	T4d	N1	M1	T4d	N1	M1	Blank(s)	Blank(s)	Blank(s)	T4d	N3
85+ years	White	Female	2013	California excluding SF/SJM/LA - 2000+	Not applicable (1973-2004, 2005 not Louisiana, or 2006+)	59	CA: Orange County (06059)	Yes	Not CHSDA	Pacific Coast	California	Breast	Malignant	8.4 Carcinoma of breast	Unclassified	XI(f) Other and unspecified carcinomas	Breast	Breast	C50.1-Central portion of breast	501	8530	Malignant	Poorly differentiated; Grade III	Left - origin of primary	Positive histology	8530/3: Inflammatory carcinoma	8530/3: Inflammatory carcinoma	8500-8549: ductal and lobular neoplasms	Not Brain	XI(f.6) Carcinomas of breast	Female Breast	IIIB	IIIB	IIIB	AJCC 6th ed derived from CS manual/coding instructions, v1.0	Blank(s)	Blank(s)	N/A	T4d	N1mi	M0	T4d	N1mi	M0	Blank(s)	Blank(s)	Blank(s)	T4d	N1
65-69 years	White	Female	2013	California excluding SF/SJM/LA - 2000+	Not applicable (1973-2004, 2005 not Louisiana, or 2006+)	73	CA: San Diego County (06073)	Yes	CHSDA	Pacific Coast	California	Breast	Malignant	8.4 Carcinoma of breast	Unclassified	XI(f) Other and unspecified carcinomas	Breast	Breast	C50.9-Breast, NOS	509	8530	Malignant	Well differentiated; Grade I	Right - origin of primary	Positive histology	8530/3: Inflammatory carcinoma	8530/3: Inflammatory carcinoma	8500-8549: ductal and lobular neoplasms	Not Brain	XI(f.6) Carcinomas of breast	Female Breast	IIIB	IIIB	IIIB	AJCC 6th ed derived from CS manual/coding instructions, v1.0	Blank(s)	Blank(s)	N/A	T4d	N2a	M0	T4d	N2a	M0	Blank(s)	Blank(s)	Blank(s)	T4d	N2
35-39 years	Other (American Indian/AK Native, Asian/Pacific Islander)	Female	2014	California excluding SF/SJM/LA - 2000+	Not applicable (1973-2004, 2005 not Louisiana, or 2006+)	73	CA: San Diego County (06073)	Yes	CHSDA	Pacific Coast	California	Breast	Malignant	8.4 Carcinoma of breast	Unclassified	XI(f) Other and unspecified carcinomas	Breast	Breast	C50.9-Breast, NOS	509	8530	Malignant	Poorly differentiated; Grade III	Right - origin of primary	Positive histology	8530/3: Inflammatory carcinoma	8530/3: Inflammatory carcinoma	8500-8549: ductal and lobular neoplasms	Not Brain	XI(f.6) Carcinomas of breast	Female Breast	IV	IV	IIIC	AJCC 6th ed derived from CS manual/coding instructions, v1.0	Blank(s)	Blank(s)	N/A	T4d	N3c	M1	T4d	N3c	M1	Blank(s)	Blank(s)	Blank(s)	T4d	N3
35-39 years	White	Female	2010	California excluding SF/SJM/LA - 2000+	Not applicable (1973-2004, 2005 not Louisiana, or 2006+)	111	CA: Ventura County (06111)	Yes	Not CHSDA	Pacific Coast	California	Breast	Malignant	8.4 Carcinoma of breast	Unclassified	XI(f) Other and unspecified carcinomas	Breast	Breast	C50.8-Overlapping lesion of breast	508	8530	Malignant	Poorly differentiated; Grade III	Right - origin of primary	Positive histology	8530/3: Inflammatory carcinoma	8530/3: Inflammatory carcinoma	8500-8549: ductal and lobular neoplasms	Not Brain	XI(f.6) Carcinomas of breast	Female Breast	IIIC	IIIC	IIIC	AJCC 6th ed derived from CS manual/coding instructions, v1.0	Blank(s)	Blank(s)	N/A	T4d	N3a	M0	T4d	N3a	M0	Blank(s)	Blank(s)	Blank(s)	T4d	N3
50-54 years	Other (American Indian/AK Native, Asian/Pacific Islander)	Female	2012	California excluding SF/SJM/LA - 2000+	Not applicable (1973-2004, 2005 not Louisiana, or 2006+)	95	CA: Solano County (06095)	Yes	Not CHSDA	Pacific Coast	California	Breast	Malignant	8.4 Carcinoma of breast	Unclassified	XI(f) Other and unspecified carcinomas	Breast	Breast	C50.1-Central portion of breast	501	8530	Malignant	Moderately differentiated; Grade II	Left - origin of primary	Positive histology	8530/3: Inflammatory carcinoma	8530/3: Inflammatory carcinoma	8500-8549: ductal and lobular neoplasms	Not Brain	XI(f.6) Carcinomas of breast	Female Breast	IIIC	IIIC	IIIC	AJCC 6th ed derived from CS manual/coding instructions, v1.0	Blank(s)	Blank(s)	N/A	T4d	N3a	M0	T4d	N3a	M0	Blank(s)	Blank(s)	Blank(s)	T4d	N3
70-74 years	White	Female	2013	California excluding SF/SJM/LA - 2000+	Not applicable (1973-2004, 2005 not Louisiana, or 2006+)	95	CA: Solano County (06095)	Yes	Not CHSDA	Pacific Coast	California	Breast	Malignant	8.4 Carcinoma of breast	Unclassified	XI(f) Other and unspecified carcinomas	Breast	Breast	C50.9-Breast, NOS	509	8530	Malignant	Unknown	Left - origin of primary	Positive histology	8530/3: Inflammatory carcinoma	8530/3: Inflammatory carcinoma	8500-8549: ductal and lobular neoplasms	Not Brain	XI(f.6) Carcinomas of breast	Female Breast	IV	IV	IV	AJCC 6th ed derived from CS manual/coding instructions, v1.0	Blank(s)	Blank(s)	N/A	T4d	NX	M1	T4d	NX	M1	Blank(s)	Blank(s)	Blank(s)	Any T, Mets	N3
65-69 years	White	Female	2013	California excluding SF/SJM/LA - 2000+	Not applicable (1973-2004, 2005 not Louisiana, or 2006+)	73	CA: San Diego County (06073)	Yes	CHSDA	Pacific Coast	California	Breast	Malignant	8.4 Carcinoma of breast	Unclassified	XI(f) Other and unspecified carcinomas	Breast	Breast	C50.8-Overlapping lesion of breast	508	8530	Malignant	Moderately differentiated; Grade II	Right - origin of primary	Positive histology	8530/3: Inflammatory carcinoma	8530/3: Inflammatory carcinoma	8500-8549: ductal and lobular neoplasms	Not Brain	XI(f.6) Carcinomas of breast	Female Breast	IV	IV	IIIC	AJCC 6th ed derived from CS manual/coding instructions, v1.0	Blank(s)	Blank(s)	N/A	T4d	N1	M1	T4d	N1	M1	Blank(s)	Blank(s)	Blank(s)	T4d	N3
55-59 years	Other (American Indian/AK Native, Asian/Pacific Islander)	Female	2011	California excluding SF/SJM/LA - 2000+	Not applicable (1973-2004, 2005 not Louisiana, or 2006+)	73	CA: San Diego County (06073)	Yes	CHSDA	Pacific Coast	California	Breast	Malignant	8.4 Carcinoma of breast	Unclassified	XI(f) Other and unspecified carcinomas	Breast	Breast	C50.9-Breast, NOS	509	8530	Malignant	Unknown	Right - origin of primary	Positive histology	8530/3: Inflammatory carcinoma	8530/3: Inflammatory carcinoma	8500-8549: ductal and lobular neoplasms	Not Brain	XI(f.6) Carcinomas of breast	Female Breast	IV	IV	IV	AJCC 6th ed derived from CS manual/coding instructions, v1.0	Blank(s)	Blank(s)	N/A	T4d	N3b	M1	T4d	N3b	M1	Blank(s)	Blank(s)	Blank(s)	Any T, Mets	N3
60-64 years	Black	Female	2013	California excluding SF/SJM/LA - 2000+	Not applicable (1973-2004, 2005 not Louisiana, or 2006+)	59	CA: Orange County (06059)	Yes	Not CHSDA	Pacific Coast	California	Breast	Malignant	8.4 Carcinoma of breast	Unclassified	XI(f) Other and unspecified carcinomas	Breast	Breast	C50.8-Overlapping lesion of breast	508	8530	Malignant	Unknown	Left - origin of primary	Positive histology	8530/3: Inflammatory carcinoma	8530/3: Inflammatory carcinoma	8500-8549: ductal and lobular neoplasms	Not Brain	XI(f.6) Carcinomas of breast	Female Breast	IV	IV	IV	AJCC 6th ed derived from CS manual/coding instructions, v1.0	Blank(s)	Blank(s)	N/A	T4d	NX	M1	T4d	NX	M1	Blank(s)	Blank(s)	Blank(s)	Any T, Mets	NX Adjusted
45-49 years	White	Female	2011	California excluding SF/SJM/LA - 2000+	Not applicable (1973-2004, 2005 not Louisiana, or 2006+)	67	CA: Sacramento County (06067)	Yes	Not CHSDA	Pacific Coast	California	Breast	Malignant	8.4 Carcinoma of breast	Unclassified	XI(f) Other and unspecified carcinomas	Breast	Breast	C50.9-Breast, NOS	509	8530	Malignant	Poorly differentiated; Grade III	Left - origin of primary	Positive histology	8530/3: Inflammatory carcinoma	8530/3: Inflammatory carcinoma	8500-8549: ductal and lobular neoplasms	Not Brain	XI(f.6) Carcinomas of breast	Female Breast	IV	IV	IV	AJCC 6th ed derived from CS manual/coding instructions, v1.0	Blank(s)	Blank(s)	N/A	T4d	NX	M1	T4d	NX	M1	Blank(s)	Blank(s)	Blank(s)	Any T, Mets	NX Adjusted
45-49 years	White	Female	2014	California excluding SF/SJM/LA - 2000+	Not applicable (1973-2004, 2005 not Louisiana, or 2006+)	95	CA: Solano County (06095)	Yes	Not CHSDA	Pacific Coast	California	Breast	Malignant	8.4 Carcinoma of breast	Unclassified	XI(f) Other and unspecified carcinomas	Breast	Breast	C50.4-Upper-outer quadrant of breast	504	8530	Malignant	Unknown	Left - origin of primary	Positive histology	8530/3: Inflammatory carcinoma	8530/3: Inflammatory carcinoma	8500-8549: ductal and lobular neoplasms	Not Brain	XI(f.6) Carcinomas of breast	Female Breast	IIIB	IIIB	IIIB	AJCC 6th ed derived from CS manual/coding instructions, v1.0	Blank(s)	Blank(s)	N/A	T4d	N0	M0	T4d	N0	M0	Blank(s)	Blank(s)	Blank(s)	T4d	N0
50-54 years	White	Female	2010	California excluding SF/SJM/LA - 2000+	Not applicable (1973-2004, 2005 not Louisiana, or 2006+)	71	CA: San Bernardino County (06071)	Yes	CHSDA	Pacific Coast	California	Breast	Malignant	8.4 Carcinoma of breast	Unclassified	XI(f) Other and unspecified carcinomas	Breast	Breast	C50.4-Upper-outer quadrant of breast	504	8530	Malignant	Poorly differentiated; Grade III	Left - origin of primary	Positive histology	8530/3: Inflammatory carcinoma	8530/3: Inflammatory carcinoma	8500-8549: ductal and lobular neoplasms	Not Brain	XI(f.6) Carcinomas of breast	Female Breast	IIIB	IIIB	IIIB	AJCC 6th ed derived from CS manual/coding instructions, v1.0	Blank(s)	Blank(s)	N/A	T4d	N2NOS	M0	T4d	N2NOS	M0	Blank(s)	Blank(s)	Blank(s)	T4d	N2
65-69 years	Other (American Indian/AK Native, Asian/Pacific Islander)	Female	2011	California excluding SF/SJM/LA - 2000+	Not applicable (1973-2004, 2005 not Louisiana, or 2006+)	59	CA: Orange County (06059)	Yes	Not CHSDA	Pacific Coast	California	Breast	Malignant	8.4 Carcinoma of breast	Unclassified	XI(f) Other and unspecified carcinomas	Breast	Breast	C50.4-Upper-outer quadrant of breast	504	8530	Malignant	Poorly differentiated; Grade III	Left - origin of primary	Positive histology	8530/3: Inflammatory carcinoma	8530/3: Inflammatory carcinoma	8500-8549: ductal and lobular neoplasms	Not Brain	XI(f.6) Carcinomas of breast	Female Breast	IV	IV	IIIC	AJCC 6th ed derived from CS manual/coding instructions, v1.0	Blank(s)	Blank(s)	N/A	T4d	N3b	M1	T4d	N3b	M1	Blank(s)	Blank(s)	Blank(s)	T4d	N3
80-84 years	Other (American Indian/AK Native, Asian/Pacific Islander)	Female	2010	California excluding SF/SJM/LA - 2000+	Not applicable (1973-2004, 2005 not Louisiana, or 2006+)	59	CA: Orange County (06059)	Yes	Not CHSDA	Pacific Coast	California	Breast	Malignant	8.4 Carcinoma of breast	Unclassified	XI(f) Other and unspecified carcinomas	Breast	Breast	C50.1-Central portion of breast	501	8530	Malignant	Unknown	Right - origin of primary	Positive histology	8530/3: Inflammatory carcinoma	8530/3: Inflammatory carcinoma	8500-8549: ductal and lobular neoplasms	Not Brain	XI(f.6) Carcinomas of breast	Female Breast	IIIB	IIIB	IIIB	AJCC 6th ed derived from CS manual/coding instructions, v1.0	Blank(s)	Blank(s)	N/A	T4d	N1	M0	T4d	N1	M0	Blank(s)	Blank(s)	Blank(s)	T4d	N1
50-54 years	White	Female	2010	California excluding SF/SJM/LA - 2000+	Not applicable (1973-2004, 2005 not Louisiana, or 2006+)	111	CA: Ventura County (06111)	Yes	Not CHSDA	Pacific Coast	California	Breast	Malignant	8.4 Carcinoma of breast	Unclassified	XI(f) Other and unspecified carcinomas	Breast	Breast	C50.9-Breast, NOS	509	8530	Malignant	Undifferentiated; anaplastic; Grade IV	Right - origin of primary	Positive histology	8530/3: Inflammatory carcinoma	8530/3: Inflammatory carcinoma	8500-8549: ductal and lobular neoplasms	Not Brain	XI(f.6) Carcinomas of breast	Female Breast	IV	IV	IV	AJCC 6th ed derived from CS manual/coding instructions, v1.0	Blank(s)	Blank(s)	N/A	T4d	N2a	M1	T4d	N2a	M1	Blank(s)	Blank(s)	Blank(s)	Any T, Mets	N2
50-54 years	White	Female	2010	California excluding SF/SJM/LA - 2000+	Not applicable (1973-2004, 2005 not Louisiana, or 2006+)	111	CA: Ventura County (06111)	Yes	Not CHSDA	Pacific Coast	California	Breast	Malignant	8.4 Carcinoma of breast	Unclassified	XI(f) Other and unspecified carcinomas	Breast	Breast	C50.9-Breast, NOS	509	8530	Malignant	Undifferentiated; anaplastic; Grade IV	Left - origin of primary	Positive histology	8530/3: Inflammatory carcinoma	8530/3: Inflammatory carcinoma	8500-8549: ductal and lobular neoplasms	Not Brain	XI(f.6) Carcinomas of breast	Female Breast	IIIB	IIIB	IIIB	AJCC 6th ed derived from CS manual/coding instructions, v1.0	Blank(s)	Blank(s)	N/A	T4d	N0	M0	T4d	N0	M0	Blank(s)	Blank(s)	Blank(s)	T4d	N0
80-84 years	White	Female	2010	California excluding SF/SJM/LA - 2000+	Not applicable (1973-2004, 2005 not Louisiana, or 2006+)	111	CA: Ventura County (06111)	Yes	Not CHSDA	Pacific Coast	California	Breast	Malignant	8.4 Carcinoma of breast	Unclassified	XI(f) Other and unspecified carcinomas	Breast	Breast	C50.9-Breast, NOS	509	8530	Malignant	Poorly differentiated; Grade III	Left - origin of primary	Positive histology	8530/3: Inflammatory carcinoma	8530/3: Inflammatory carcinoma	8500-8549: ductal and lobular neoplasms	Not Brain	XI(f.6) Carcinomas of breast	Female Breast	IIIC	IIIC	IIIC	AJCC 6th ed derived from CS manual/coding instructions, v1.0	Blank(s)	Blank(s)	N/A	T4d	N3a	M0	T4d	N3a	M0	Blank(s)	Blank(s)	Blank(s)	T4d	N3
70-74 years	White	Female	2014	California excluding SF/SJM/LA - 2000+	Not applicable (1973-2004, 2005 not Louisiana, or 2006+)	111	CA: Ventura County (06111)	Yes	Not CHSDA	Pacific Coast	California	Breast	Malignant	8.4 Carcinoma of breast	Unclassified	XI(f) Other and unspecified carcinomas	Breast	Breast	C50.9-Breast, NOS	509	8530	Malignant	Poorly differentiated; Grade III	Right - origin of primary	Positive histology	8530/3: Inflammatory carcinoma	8530/3: Inflammatory carcinoma	8500-8549: ductal and lobular neoplasms	Not Brain	XI(f.6) Carcinomas of breast	Female Breast	IIIC	IIIC	IIIC	AJCC 6th ed derived from CS manual/coding instructions, v1.0	Blank(s)	Blank(s)	N/A	T4d	N3a	M0	T4d	N3a	M0	Blank(s)	Blank(s)	Blank(s)	T4d	N3
55-59 years	White	Female	2010	California excluding SF/SJM/LA - 2000+	Not applicable (1973-2004, 2005 not Louisiana, or 2006+)	77	CA: San Joaquin County (06077)	Yes	Not CHSDA	Pacific Coast	California	Breast	Malignant	8.4 Carcinoma of breast	Unclassified	XI(f) Other and unspecified carcinomas	Breast	Breast	C50.9-Breast, NOS	509	8530	Malignant	Unknown	Bilateral, single primary	Positive histology	8530/3: Inflammatory carcinoma	8530/3: Inflammatory carcinoma	8500-8549: ductal and lobular neoplasms	Not Brain	XI(f.6) Carcinomas of breast	Female Breast	IV	IV	IV	AJCC 6th ed derived from CS manual/coding instructions, v1.0	Blank(s)	Blank(s)	N/A	T4d	NX	M1	T4d	NX	M1	Blank(s)	Blank(s)	Blank(s)	Any T, Mets	NX Adjusted
55-59 years	White	Female	2010	California excluding SF/SJM/LA - 2000+	Not applicable (1973-2004, 2005 not Louisiana, or 2006+)	71	CA: San Bernardino County (06071)	Yes	CHSDA	Pacific Coast	California	Breast	Malignant	8.4 Carcinoma of breast	Unclassified	XI(f) Other and unspecified carcinomas	Breast	Breast	C50.4-Upper-outer quadrant of breast	504	8530	Malignant	Poorly differentiated; Grade III	Left - origin of primary	Positive histology	8530/3: Inflammatory carcinoma	8530/3: Inflammatory carcinoma	8500-8549: ductal and lobular neoplasms	Not Brain	XI(f.6) Carcinomas of breast	Female Breast	IIIC	IIIC	IIIC	AJCC 6th ed derived from CS manual/coding instructions, v1.0	Blank(s)	Blank(s)	N/A	T4d	N3NOS	M0	T4d	N3NOS	M0	Blank(s)	Blank(s)	Blank(s)	T4d	N3
35-39 years	Other (American Indian/AK Native, Asian/Pacific Islander)	Female	2010	California excluding SF/SJM/LA - 2000+	Not applicable (1973-2004, 2005 not Louisiana, or 2006+)	111	CA: Ventura County (06111)	Yes	Not CHSDA	Pacific Coast	California	Breast	Malignant	8.4 Carcinoma of breast	Unclassified	XI(f) Other and unspecified carcinomas	Breast	Breast	C50.9-Breast, NOS	509	8530	Malignant	Poorly differentiated; Grade III	Left - origin of primary	Positive histology	8530/3: Inflammatory carcinoma	8530/3: Inflammatory carcinoma	8500-8549: ductal and lobular neoplasms	Not Brain	XI(f.6) Carcinomas of breast	Female Breast	IV	IV	IV	AJCC 6th ed derived from CS manual/coding instructions, v1.0	Blank(s)	Blank(s)	N/A	T4d	N2a	M1	T4d	N2a	M1	Blank(s)	Blank(s)	Blank(s)	Any T, Mets	N2
70-74 years	White	Female	2010	California excluding SF/SJM/LA - 2000+	Not applicable (1973-2004, 2005 not Louisiana, or 2006+)	65	CA: Riverside County (06065)	Yes	CHSDA	Pacific Coast	California	Breast	Malignant	8.4 Carcinoma of breast	Unclassified	XI(f) Other and unspecified carcinomas	Breast	Breast	C50.1-Central portion of breast	501	8530	Malignant	Poorly differentiated; Grade III	Right - origin of primary	Positive histology	8530/3: Inflammatory carcinoma	8530/3: Inflammatory carcinoma	8500-8549: ductal and lobular neoplasms	Not Brain	XI(f.6) Carcinomas of breast	Female Breast	IIIC	IIIC	IIIC	AJCC 6th ed derived from CS manual/coding instructions, v1.0	Blank(s)	Blank(s)	N/A	T4d	N3a	M0	T4d	N3a	M0	Blank(s)	Blank(s)	Blank(s)	T4d	N3
50-54 years	White	Female	2010	California excluding SF/SJM/LA - 2000+	Not applicable (1973-2004, 2005 not Louisiana, or 2006+)	59	CA: Orange County (06059)	Yes	Not CHSDA	Pacific Coast	California	Breast	Malignant	8.4 Carcinoma of breast	Unclassified	XI(f) Other and unspecified carcinomas	Breast	Breast	C50.9-Breast, NOS	509	8530	Malignant	Unknown	Right - origin of primary	Positive histology	8530/3: Inflammatory carcinoma	8530/3: Inflammatory carcinoma	8500-8549: ductal and lobular neoplasms	Not Brain	XI(f.6) Carcinomas of breast	Female Breast	IV	IV	IV	AJCC 6th ed derived from CS manual/coding instructions, v1.0	Blank(s)	Blank(s)	N/A	T4d	N2a	M1	T4d	N2a	M1	Blank(s)	Blank(s)	Blank(s)	Any T, Mets	N2
50-54 years	White	Female	2010	California excluding SF/SJM/LA - 2000+	Not applicable (1973-2004, 2005 not Louisiana, or 2006+)	111	CA: Ventura County (06111)	Yes	Not CHSDA	Pacific Coast	California	Breast	Malignant	8.4 Carcinoma of breast	Unclassified	XI(f) Other and unspecified carcinomas	Breast	Breast	C50.9-Breast, NOS	509	8530	Malignant	Poorly differentiated; Grade III	Right - origin of primary	Positive histology	8530/3: Inflammatory carcinoma	8530/3: Inflammatory carcinoma	8500-8549: ductal and lobular neoplasms	Not Brain	XI(f.6) Carcinomas of breast	Female Breast	IV	IV	IV	AJCC 6th ed derived from CS manual/coding instructions, v1.0	Blank(s)	Blank(s)	N/A	T4d	N0	M1	T4d	N0	M1	Blank(s)	Blank(s)	Blank(s)	Any T, Mets	N0
55-59 years	White	Female	2013	California excluding SF/SJM/LA - 2000+	Not applicable (1973-2004, 2005 not Louisiana, or 2006+)	73	CA: San Diego County (06073)	Yes	CHSDA	Pacific Coast	California	Breast	Malignant	8.4 Carcinoma of breast	Unclassified	XI(f) Other and unspecified carcinomas	Breast	Breast	C50.9-Breast, NOS	509	8530	Malignant	Poorly differentiated; Grade III	Right - origin of primary	Positive histology	8530/3: Inflammatory carcinoma	8530/3: Inflammatory carcinoma	8500-8549: ductal and lobular neoplasms	Not Brain	XI(f.6) Carcinomas of breast	Female Breast	IV	IV	IV	AJCC 6th ed derived from CS manual/coding instructions, v1.0	Blank(s)	Blank(s)	N/A	T4d	NX	M1	T4d	NX	M1	Blank(s)	Blank(s)	Blank(s)	Any T, Mets	NX Adjusted
55-59 years	White	Female	2010	California excluding SF/SJM/LA - 2000+	Not applicable (1973-2004, 2005 not Louisiana, or 2006+)	59	CA: Orange County (06059)	Yes	Not CHSDA	Pacific Coast	California	Breast	Malignant	8.4 Carcinoma of breast	Unclassified	XI(f) Other and unspecified carcinomas	Breast	Breast	C50.8-Overlapping lesion of breast	508	8530	Malignant	Poorly differentiated; Grade III	Right - origin of primary	Positive histology	8530/3: Inflammatory carcinoma	8530/3: Inflammatory carcinoma	8500-8549: ductal and lobular neoplasms	Not Brain	XI(f.6) Carcinomas of breast	Female Breast	IIIC	IIIC	IIIC	AJCC 6th ed derived from CS manual/coding instructions, v1.0	Blank(s)	Blank(s)	N/A	T4d	N3a	M0	T4d	N3a	M0	Blank(s)	Blank(s)	Blank(s)	T4d	N3
50-54 years	White	Female	2010	California excluding SF/SJM/LA - 2000+	Not applicable (1973-2004, 2005 not Louisiana, or 2006+)	19	CA: Fresno County (06019)	Yes	CHSDA	Pacific Coast	California	Breast	Malignant	8.4 Carcinoma of breast	Unclassified	XI(f) Other and unspecified carcinomas	Breast	Breast	C50.9-Breast, NOS	509	8530	Malignant	Poorly differentiated; Grade III	Right - origin of primary	Positive histology	8530/3: Inflammatory carcinoma	8530/3: Inflammatory carcinoma	8500-8549: ductal and lobular neoplasms	Not Brain	XI(f.6) Carcinomas of breast	Female Breast	IV	IV	IV	AJCC 6th ed derived from CS manual/coding instructions, v1.0	Blank(s)	Blank(s)	N/A	T4d	N2NOS	M1	T4d	N2NOS	M1	Blank(s)	Blank(s)	Blank(s)	Any T, Mets	N2
40-44 years	White	Female	2010	California excluding SF/SJM/LA - 2000+	Not applicable (1973-2004, 2005 not Louisiana, or 2006+)	71	CA: San Bernardino County (06071)	Yes	CHSDA	Pacific Coast	California	Breast	Malignant	8.4 Carcinoma of breast	Unclassified	XI(f) Other and unspecified carcinomas	Breast	Breast	C50.8-Overlapping lesion of breast	508	8530	Malignant	Poorly differentiated; Grade III	Right - origin of primary	Positive histology	8530/3: Inflammatory carcinoma	8530/3: Inflammatory carcinoma	8500-8549: ductal and lobular neoplasms	Not Brain	XI(f.6) Carcinomas of breast	Female Breast	IV	IV	IV	AJCC 6th ed derived from CS manual/coding instructions, v1.0	Blank(s)	Blank(s)	N/A	T4d	N0	M1	T4d	N0	M1	Blank(s)	Blank(s)	Blank(s)	Any T, Mets	N0
50-54 years	White	Female	2010	California excluding SF/SJM/LA - 2000+	Not applicable (1973-2004, 2005 not Louisiana, or 2006+)	99	CA: Stanislaus County (06099)	Yes	Not CHSDA	Pacific Coast	California	Breast	Malignant	8.4 Carcinoma of breast	Unclassified	XI(f) Other and unspecified carcinomas	Breast	Breast	C50.9-Breast, NOS	509	8530	Malignant	Poorly differentiated; Grade III	Right - origin of primary	Positive histology	8530/3: Inflammatory carcinoma	8530/3: Inflammatory carcinoma	8500-8549: ductal and lobular neoplasms	Not Brain	XI(f.6) Carcinomas of breast	Female Breast	IIIB	IIIB	IIIB	AJCC 6th ed derived from CS manual/coding instructions, v1.0	Blank(s)	Blank(s)	N/A	T4d	N2a	M0	T4d	N2a	M0	Blank(s)	Blank(s)	Blank(s)	T4d	N2
65-69 years	White	Female	2010	California excluding SF/SJM/LA - 2000+	Not applicable (1973-2004, 2005 not Louisiana, or 2006+)	93	CA: Siskiyou County (06093)	Yes	CHSDA	Pacific Coast	California	Breast	Malignant	8.4 Carcinoma of breast	Unclassified	XI(f) Other and unspecified carcinomas	Breast	Breast	C50.8-Overlapping lesion of breast	508	8530	Malignant	Poorly differentiated; Grade III	Left - origin of primary	Positive histology	8530/3: Inflammatory carcinoma	8530/3: Inflammatory carcinoma	8500-8549: ductal and lobular neoplasms	Not Brain	XI(f.6) Carcinomas of breast	Female Breast	IIINOS	IIINOS	IIINOS	AJCC 6th ed derived from CS manual/coding instructions, v1.0	Blank(s)	Blank(s)	N/A	T4d	NX	M0	T4d	NX	M0	Blank(s)	Blank(s)	Blank(s)	T4d	NX Adjusted
60-64 years	Other (American Indian/AK Native, Asian/Pacific Islander)	Female	2010	California excluding SF/SJM/LA - 2000+	Not applicable (1973-2004, 2005 not Louisiana, or 2006+)	23	CA: Humboldt County (06023)	Yes	CHSDA	Pacific Coast	California	Breast	Malignant	8.4 Carcinoma of breast	Unclassified	XI(f) Other and unspecified carcinomas	Breast	Breast	C50.1-Central portion of breast	501	8530	Malignant	Poorly differentiated; Grade III	Right - origin of primary	Positive histology	8530/3: Inflammatory carcinoma	8530/3: Inflammatory carcinoma	8500-8549: ductal and lobular neoplasms	Not Brain	XI(f.6) Carcinomas of breast	Female Breast	IIIB	IIIB	IIIB	AJCC 6th ed derived from CS manual/coding instructions, v1.0	Blank(s)	Blank(s)	N/A	T4d	N1a	M0	T4d	N1a	M0	Blank(s)	Blank(s)	Blank(s)	T4d	N1
50-54 years	White	Female	2010	California excluding SF/SJM/LA - 2000+	Not applicable (1973-2004, 2005 not Louisiana, or 2006+)	59	CA: Orange County (06059)	Yes	Not CHSDA	Pacific Coast	California	Breast	Malignant	8.4 Carcinoma of breast	Unclassified	XI(f) Other and unspecified carcinomas	Breast	Breast	C50.4-Upper-outer quadrant of breast	504	8530	Malignant	Moderately differentiated; Grade II	Right - origin of primary	Positive histology	8530/3: Inflammatory carcinoma	8530/3: Inflammatory carcinoma	8500-8549: ductal and lobular neoplasms	Not Brain	XI(f.6) Carcinomas of breast	Female Breast	IIIB	IIIB	IIIB	AJCC 6th ed derived from CS manual/coding instructions, v1.0	Blank(s)	Blank(s)	N/A	T4d	N1	M0	T4d	N1	M0	Blank(s)	Blank(s)	Blank(s)	T4d	N1
55-59 years	White	Female	2010	California excluding SF/SJM/LA - 2000+	Not applicable (1973-2004, 2005 not Louisiana, or 2006+)	65	CA: Riverside County (06065)	Yes	CHSDA	Pacific Coast	California	Breast	Malignant	8.4 Carcinoma of breast	Unclassified	XI(f) Other and unspecified carcinomas	Breast	Breast	C50.9-Breast, NOS	509	8530	Malignant	Poorly differentiated; Grade III	Left - origin of primary	Positive histology	8530/3: Inflammatory carcinoma	8530/3: Inflammatory carcinoma	8500-8549: ductal and lobular neoplasms	Not Brain	XI(f.6) Carcinomas of breast	Female Breast	IV	IV	IV	AJCC 6th ed derived from CS manual/coding instructions, v1.0	Blank(s)	Blank(s)	N/A	T4d	N2NOS	M1	T4d	N2NOS	M1	Blank(s)	Blank(s)	Blank(s)	Any T, Mets	N2
65-69 years	White	Female	2010	California excluding SF/SJM/LA - 2000+	Not applicable (1973-2004, 2005 not Louisiana, or 2006+)	73	CA: San Diego County (06073)	Yes	CHSDA	Pacific Coast	California	Breast	Malignant	8.4 Carcinoma of breast	Unclassified	XI(f) Other and unspecified carcinomas	Breast	Breast	C50.2-Upper-inner quadrant of breast	502	8530	Malignant	Unknown	Left - origin of primary	Positive histology	8530/3: Inflammatory carcinoma	8530/3: Inflammatory carcinoma	8500-8549: ductal and lobular neoplasms	Not Brain	XI(f.6) Carcinomas of breast	Female Breast	IIIC	IIIC	IIIC	AJCC 6th ed derived from CS manual/coding instructions, v1.0	Blank(s)	Blank(s)	N/A	T4d	N3b	M0	T4d	N3b	M0	Blank(s)	Blank(s)	Blank(s)	T4d	N3
30-34 years	White	Female	2010	California excluding SF/SJM/LA - 2000+	Not applicable (1973-2004, 2005 not Louisiana, or 2006+)	77	CA: San Joaquin County (06077)	Yes	Not CHSDA	Pacific Coast	California	Breast	Malignant	8.4 Carcinoma of breast	Unclassified	XI(f) Other and unspecified carcinomas	Breast	Breast	C50.9-Breast, NOS	509	8530	Malignant	Unknown	Left - origin of primary	Positive histology	8530/3: Inflammatory carcinoma	8530/3: Inflammatory carcinoma	8500-8549: ductal and lobular neoplasms	Not Brain	XI(f.6) Carcinomas of breast	Female Breast	IIIB	IIIB	IIIB	AJCC 6th ed derived from CS manual/coding instructions, v1.0	Blank(s)	Blank(s)	N/A	T4d	N1	M0	T4d	N1	M0	Blank(s)	Blank(s)	Blank(s)	T4d	N1
55-59 years	Other (American Indian/AK Native, Asian/Pacific Islander)	Female	2010	California excluding SF/SJM/LA - 2000+	Not applicable (1973-2004, 2005 not Louisiana, or 2006+)	95	CA: Solano County (06095)	Yes	Not CHSDA	Pacific Coast	California	Breast	Malignant	8.4 Carcinoma of breast	Unclassified	XI(f) Other and unspecified carcinomas	Breast	Breast	C50.9-Breast, NOS	509	8530	Malignant	Poorly differentiated; Grade III	Left - origin of primary	Positive histology	8530/3: Inflammatory carcinoma	8530/3: Inflammatory carcinoma	8500-8549: ductal and lobular neoplasms	Not Brain	XI(f.6) Carcinomas of breast	Female Breast	IV	IV	IV	AJCC 6th ed derived from CS manual/coding instructions, v1.0	Blank(s)	Blank(s)	N/A	T4d	N1	M1	T4d	N1	M1	Blank(s)	Blank(s)	Blank(s)	Any T, Mets	N1
80-84 years	White	Female	2010	California excluding SF/SJM/LA - 2000+	Not applicable (1973-2004, 2005 not Louisiana, or 2006+)	111	CA: Ventura County (06111)	Yes	Not CHSDA	Pacific Coast	California	Breast	Malignant	8.4 Carcinoma of breast	Unclassified	XI(f) Other and unspecified carcinomas	Breast	Breast	C50.9-Breast, NOS	509	8530	Malignant	Unknown	Left - origin of primary	Positive histology	8530/3: Inflammatory carcinoma	8530/3: Inflammatory carcinoma	8500-8549: ductal and lobular neoplasms	Not Brain	XI(f.6) Carcinomas of breast	Female Breast	IV	IV	IV	AJCC 6th ed derived from CS manual/coding instructions, v1.0	Blank(s)	Blank(s)	N/A	T4d	NX	M1	T4d	NX	M1	Blank(s)	Blank(s)	Blank(s)	Any T, Mets	NX Adjusted
50-54 years	White	Female	2010	California excluding SF/SJM/LA - 2000+	Not applicable (1973-2004, 2005 not Louisiana, or 2006+)	65	CA: Riverside County (06065)	Yes	CHSDA	Pacific Coast	California	Breast	Malignant	8.4 Carcinoma of breast	Unclassified	XI(f) Other and unspecified carcinomas	Breast	Breast	C50.8-Overlapping lesion of breast	508	8530	Malignant	Unknown	Left - origin of primary	Positive histology	8530/3: Inflammatory carcinoma	8530/3: Inflammatory carcinoma	8500-8549: ductal and lobular neoplasms	Not Brain	XI(f.6) Carcinomas of breast	Female Breast	IIIB	IIIB	IIIB	AJCC 6th ed derived from CS manual/coding instructions, v1.0	Blank(s)	Blank(s)	N/A	T4d	N0	M0	T4d	N0	M0	Blank(s)	Blank(s)	Blank(s)	T4d	N0
85+ years	White	Female	2010	California excluding SF/SJM/LA - 2000+	Not applicable (1973-2004, 2005 not Louisiana, or 2006+)	59	CA: Orange County (06059)	Yes	Not CHSDA	Pacific Coast	California	Breast	Malignant	8.4 Carcinoma of breast	Unclassified	XI(f) Other and unspecified carcinomas	Breast	Breast	C50.1-Central portion of breast	501	8530	Malignant	Moderately differentiated; Grade II	Right - origin of primary	Positive histology	8530/3: Inflammatory carcinoma	8530/3: Inflammatory carcinoma	8500-8549: ductal and lobular neoplasms	Not Brain	XI(f.6) Carcinomas of breast	Female Breast	IIIB	UNK Stage	UNK Stage	AJCC 6th ed derived from CS manual/coding instructions, v1.0	Blank(s)	Blank(s)	N/A	T4d	N1	M0	T4d	N1	MX	Blank(s)	Blank(s)	Blank(s)	TX Adjusted	NX Adjusted
55-59 years	White	Female	2010	California excluding SF/SJM/LA - 2000+	Not applicable (1973-2004, 2005 not Louisiana, or 2006+)	59	CA: Orange County (06059)	Yes	Not CHSDA	Pacific Coast	California	Breast	Malignant	8.4 Carcinoma of breast	Unclassified	XI(f) Other and unspecified carcinomas	Breast	Breast	C50.8-Overlapping lesion of breast	508	8530	Malignant	Poorly differentiated; Grade III	Left - origin of primary	Positive histology	8530/3: Inflammatory carcinoma	8530/3: Inflammatory carcinoma	8500-8549: ductal and lobular neoplasms	Not Brain	XI(f.6) Carcinomas of breast	Female Breast	IIIB	IIIB	IIIB	AJCC 6th ed derived from CS manual/coding instructions, v1.0	Blank(s)	Blank(s)	N/A	T4d	N1a	M0	T4d	N1a	M0	Blank(s)	Blank(s)	Blank(s)	T4d	N1
45-49 years	Other (American Indian/AK Native, Asian/Pacific Islander)	Female	2010	California excluding SF/SJM/LA - 2000+	Not applicable (1973-2004, 2005 not Louisiana, or 2006+)	73	CA: San Diego County (06073)	Yes	CHSDA	Pacific Coast	California	Breast	Malignant	8.4 Carcinoma of breast	Unclassified	XI(f) Other and unspecified carcinomas	Breast	Breast	C50.9-Breast, NOS	509	8530	Malignant	Poorly differentiated; Grade III	Left - origin of primary	Positive histology	8530/3: Inflammatory carcinoma	8530/3: Inflammatory carcinoma	8500-8549: ductal and lobular neoplasms	Not Brain	XI(f.6) Carcinomas of breast	Female Breast	IIIB	IIIB	IIIB	AJCC 6th ed derived from CS manual/coding instructions, v1.0	Blank(s)	Blank(s)	N/A	T4d	N1	M0	T4d	N1	M0	Blank(s)	Blank(s)	Blank(s)	T4d	N1
45-49 years	Other (American Indian/AK Native, Asian/Pacific Islander)	Female	2010	California excluding SF/SJM/LA - 2000+	Not applicable (1973-2004, 2005 not Louisiana, or 2006+)	73	CA: San Diego County (06073)	Yes	CHSDA	Pacific Coast	California	Breast	Malignant	8.4 Carcinoma of breast	Unclassified	XI(f) Other and unspecified carcinomas	Breast	Breast	C50.9-Breast, NOS	509	8530	Malignant	Poorly differentiated; Grade III	Right - origin of primary	Positive histology	8530/3: Inflammatory carcinoma	8530/3: Inflammatory carcinoma	8500-8549: ductal and lobular neoplasms	Not Brain	XI(f.6) Carcinomas of breast	Female Breast	IIIC	IIIC	IIIC	AJCC 6th ed derived from CS manual/coding instructions, v1.0	Blank(s)	Blank(s)	N/A	T4d	N3a	M0	T4d	N3a	M0	Blank(s)	Blank(s)	Blank(s)	T4d	N3
60-64 years	White	Female	2011	California excluding SF/SJM/LA - 2000+	Not applicable (1973-2004, 2005 not Louisiana, or 2006+)	71	CA: San Bernardino County (06071)	Yes	CHSDA	Pacific Coast	California	Breast	Malignant	8.4 Carcinoma of breast	Unclassified	XI(f) Other and unspecified carcinomas	Breast	Breast	C50.9-Breast, NOS	509	8530	Malignant	Poorly differentiated; Grade III	Right - origin of primary	Pos hist AND immunophenotyping AND/OR pos genetic studies	8530/3: Inflammatory carcinoma	8530/3: Inflammatory carcinoma	8500-8549: ductal and lobular neoplasms	Not Brain	XI(f.6) Carcinomas of breast	Female Breast	IV	IV	IV	AJCC 6th ed derived from CS manual/coding instructions, v1.0	Blank(s)	Blank(s)	N/A	T4d	N2a	M1	T4d	N2a	M1	Blank(s)	Blank(s)	Blank(s)	Any T, Mets	N2
60-64 years	Black	Female	2011	California excluding SF/SJM/LA - 2000+	Not applicable (1973-2004, 2005 not Louisiana, or 2006+)	65	CA: Riverside County (06065)	Yes	CHSDA	Pacific Coast	California	Breast	Malignant	8.4 Carcinoma of breast	Unclassified	XI(f) Other and unspecified carcinomas	Breast	Breast	C50.9-Breast, NOS	509	8530	Malignant	Poorly differentiated; Grade III	Right - origin of primary	Positive histology	8530/3: Inflammatory carcinoma	8530/3: Inflammatory carcinoma	8500-8549: ductal and lobular neoplasms	Not Brain	XI(f.6) Carcinomas of breast	Female Breast	IV	IV	IV	AJCC 6th ed derived from CS manual/coding instructions, v1.0	Blank(s)	Blank(s)	N/A	T4d	N2a	M1	T4d	N2a	M1	Blank(s)	Blank(s)	Blank(s)	Any T, Mets	N2
50-54 years	White	Female	2010	California excluding SF/SJM/LA - 2000+	Not applicable (1973-2004, 2005 not Louisiana, or 2006+)	73	CA: San Diego County (06073)	Yes	CHSDA	Pacific Coast	California	Breast	Malignant	8.4 Carcinoma of breast	Unclassified	XI(f) Other and unspecified carcinomas	Breast	Breast	C50.9-Breast, NOS	509	8530	Malignant	Moderately differentiated; Grade II	Left - origin of primary	Positive histology	8530/3: Inflammatory carcinoma	8530/3: Inflammatory carcinoma	8500-8549: ductal and lobular neoplasms	Not Brain	XI(f.6) Carcinomas of breast	Female Breast	IIIB	IIIB	IIIB	AJCC 6th ed derived from CS manual/coding instructions, v1.0	Blank(s)	Blank(s)	N/A	T4d	N2NOS	M0	T4d	N2NOS	M0	Blank(s)	Blank(s)	Blank(s)	T4d	N2
55-59 years	White	Female	2010	California excluding SF/SJM/LA - 2000+	Not applicable (1973-2004, 2005 not Louisiana, or 2006+)	9	CA: Calaveras County (06009)	Yes	CHSDA	Pacific Coast	California	Breast	Malignant	8.4 Carcinoma of breast	Unclassified	XI(f) Other and unspecified carcinomas	Breast	Breast	C50.8-Overlapping lesion of breast	508	8530	Malignant	Poorly differentiated; Grade III	Left - origin of primary	Positive histology	8530/3: Inflammatory carcinoma	8530/3: Inflammatory carcinoma	8500-8549: ductal and lobular neoplasms	Not Brain	XI(f.6) Carcinomas of breast	Female Breast	IV	IV	IV	AJCC 6th ed derived from CS manual/coding instructions, v1.0	Blank(s)	Blank(s)	N/A	T4d	N3c	M1	T4d	N3c	M1	Blank(s)	Blank(s)	Blank(s)	Any T, Mets	N3
55-59 years	White	Female	2014	California excluding SF/SJM/LA - 2000+	Not applicable (1973-2004, 2005 not Louisiana, or 2006+)	39	CA: Madera County (06039)	Yes	CHSDA	Pacific Coast	California	Breast	Malignant	8.4 Carcinoma of breast	Unclassified	XI(f) Other and unspecified carcinomas	Breast	Breast	C50.8-Overlapping lesion of breast	508	8530	Malignant	Poorly differentiated; Grade III	Right - origin of primary	Positive histology	8530/3: Inflammatory carcinoma	8530/3: Inflammatory carcinoma	8500-8549: ductal and lobular neoplasms	Not Brain	XI(f.6) Carcinomas of breast	Female Breast	IIIB	IIIB	IIIB	AJCC 6th ed derived from CS manual/coding instructions, v1.0	Blank(s)	Blank(s)	N/A	T4d	N2a	M0	T4d	N2a	M0	Blank(s)	Blank(s)	Blank(s)	T4d	N2
50-54 years	White	Female	2011	California excluding SF/SJM/LA - 2000+	Not applicable (1973-2004, 2005 not Louisiana, or 2006+)	111	CA: Ventura County (06111)	Yes	Not CHSDA	Pacific Coast	California	Breast	Malignant	8.4 Carcinoma of breast	Unclassified	XI(f) Other and unspecified carcinomas	Breast	Breast	C50.9-Breast, NOS	509	8530	Malignant	Poorly differentiated; Grade III	Right - origin of primary	Positive histology	8530/3: Inflammatory carcinoma	8530/3: Inflammatory carcinoma	8500-8549: ductal and lobular neoplasms	Not Brain	XI(f.6) Carcinomas of breast	Female Breast	IIINOS	IIINOS	IIINOS	AJCC 6th ed derived from CS manual/coding instructions, v1.0	Blank(s)	Blank(s)	N/A	T4d	NX	M0	T4d	NX	M0	Blank(s)	Blank(s)	Blank(s)	T4d	NX Adjusted
55-59 years	White	Female	2011	California excluding SF/SJM/LA - 2000+	Not applicable (1973-2004, 2005 not Louisiana, or 2006+)	71	CA: San Bernardino County (06071)	Yes	CHSDA	Pacific Coast	California	Breast	Malignant	8.4 Carcinoma of breast	Unclassified	XI(f) Other and unspecified carcinomas	Breast	Breast	C50.9-Breast, NOS	509	8530	Malignant	Poorly differentiated; Grade III	Right - origin of primary	Positive histology	8530/3: Inflammatory carcinoma	8530/3: Inflammatory carcinoma	8500-8549: ductal and lobular neoplasms	Not Brain	XI(f.6) Carcinomas of breast	Female Breast	IIIB	IIIB	IIIB	AJCC 6th ed derived from CS manual/coding instructions, v1.0	Blank(s)	Blank(s)	N/A	T4d	N1mi	M0	T4d	N1mi	M0	Blank(s)	Blank(s)	Blank(s)	T4d	N1
55-59 years	White	Female	2010	California excluding SF/SJM/LA - 2000+	Not applicable (1973-2004, 2005 not Louisiana, or 2006+)	99	CA: Stanislaus County (06099)	Yes	Not CHSDA	Pacific Coast	California	Breast	Malignant	8.4 Carcinoma of breast	Unclassified	XI(f) Other and unspecified carcinomas	Breast	Breast	C50.9-Breast, NOS	509	8530	Malignant	Unknown	Only one side - side unspecified	Positive histology	8530/3: Inflammatory carcinoma	8530/3: Inflammatory carcinoma	8500-8549: ductal and lobular neoplasms	Not Brain	XI(f.6) Carcinomas of breast	Female Breast	IV	IV	IV	AJCC 6th ed derived from CS manual/coding instructions, v1.0	Blank(s)	Blank(s)	N/A	T4d	NX	M1	T4d	NX	M1	Blank(s)	Blank(s)	Blank(s)	Any T, Mets	NX Adjusted
35-39 years	White	Female	2011	California excluding SF/SJM/LA - 2000+	Not applicable (1973-2004, 2005 not Louisiana, or 2006+)	71	CA: San Bernardino County (06071)	Yes	CHSDA	Pacific Coast	California	Breast	Malignant	8.4 Carcinoma of breast	Unclassified	XI(f) Other and unspecified carcinomas	Breast	Breast	C50.9-Breast, NOS	509	8530	Malignant	Undifferentiated; anaplastic; Grade IV	Paired site, but no information concerning laterality	Positive histology	8530/3: Inflammatory carcinoma	8530/3: Inflammatory carcinoma	8500-8549: ductal and lobular neoplasms	Not Brain	XI(f.6) Carcinomas of breast	Female Breast	IV	IV	IIIC	AJCC 6th ed derived from CS manual/coding instructions, v1.0	Blank(s)	Blank(s)	N/A	T4d	N1	M1	T4d	N1	M1	Blank(s)	Blank(s)	Blank(s)	T4d	N3
45-49 years	White	Female	2010	California excluding SF/SJM/LA - 2000+	Not applicable (1973-2004, 2005 not Louisiana, or 2006+)	65	CA: Riverside County (06065)	Yes	CHSDA	Pacific Coast	California	Breast	Malignant	8.4 Carcinoma of breast	Unclassified	XI(f) Other and unspecified carcinomas	Breast	Breast	C50.4-Upper-outer quadrant of breast	504	8530	Malignant	Unknown	Left - origin of primary	Positive histology	8530/3: Inflammatory carcinoma	8530/3: Inflammatory carcinoma	8500-8549: ductal and lobular neoplasms	Not Brain	XI(f.6) Carcinomas of breast	Female Breast	IV	IV	IV	AJCC 6th ed derived from CS manual/coding instructions, v1.0	Blank(s)	Blank(s)	N/A	T4d	NX	M1	T4d	NX	M1	Blank(s)	Blank(s)	Blank(s)	Any T, Mets	NX Adjusted
55-59 years	White	Female	2011	California excluding SF/SJM/LA - 2000+	Not applicable (1973-2004, 2005 not Louisiana, or 2006+)	99	CA: Stanislaus County (06099)	Yes	Not CHSDA	Pacific Coast	California	Breast	Malignant	8.4 Carcinoma of breast	Unclassified	XI(f) Other and unspecified carcinomas	Breast	Breast	C50.9-Breast, NOS	509	8530	Malignant	Unknown	Left - origin of primary	Positive histology	8530/3: Inflammatory carcinoma	8530/3: Inflammatory carcinoma	8500-8549: ductal and lobular neoplasms	Not Brain	XI(f.6) Carcinomas of breast	Female Breast	IIINOS	UNK Stage	UNK Stage	AJCC 6th ed derived from CS manual/coding instructions, v1.0	Blank(s)	Blank(s)	N/A	T4d	NX	M0	T4d	NX	MX	Blank(s)	Blank(s)	Blank(s)	TX Adjusted	NX Adjusted
65-69 years	Other (American Indian/AK Native, Asian/Pacific Islander)	Female	2010	California excluding SF/SJM/LA - 2000+	Not applicable (1973-2004, 2005 not Louisiana, or 2006+)	33	CA: Lake County (06033)	Yes	CHSDA	Pacific Coast	California	Breast	Malignant	8.4 Carcinoma of breast	Unclassified	XI(f) Other and unspecified carcinomas	Breast	Breast	C50.9-Breast, NOS	509	8530	Malignant	Unknown	Right - origin of primary	Positive histology	8530/3: Inflammatory carcinoma	8530/3: Inflammatory carcinoma	8500-8549: ductal and lobular neoplasms	Not Brain	XI(f.6) Carcinomas of breast	Female Breast	IV	IV	IIIC	AJCC 6th ed derived from CS manual/coding instructions, v1.0	Blank(s)	Blank(s)	N/A	T4d	N3c	M1	T4d	N3c	M1	Blank(s)	Blank(s)	Blank(s)	T4d	N3
50-54 years	White	Female	2011	California excluding SF/SJM/LA - 2000+	Not applicable (1973-2004, 2005 not Louisiana, or 2006+)	73	CA: San Diego County (06073)	Yes	CHSDA	Pacific Coast	California	Breast	Malignant	8.4 Carcinoma of breast	Unclassified	XI(f) Other and unspecified carcinomas	Breast	Breast	C50.1-Central portion of breast	501	8530	Malignant	Moderately differentiated; Grade II	Right - origin of primary	Positive histology	8530/3: Inflammatory carcinoma	8530/3: Inflammatory carcinoma	8500-8549: ductal and lobular neoplasms	Not Brain	XI(f.6) Carcinomas of breast	Female Breast	IIIC	IIIC	IIIC	AJCC 6th ed derived from CS manual/coding instructions, v1.0	Blank(s)	Blank(s)	N/A	T4d	N3a	M0	T4d	N3a	M0	Blank(s)	Blank(s)	Blank(s)	T4d	N3
80-84 years	White	Female	2010	California excluding SF/SJM/LA - 2000+	Not applicable (1973-2004, 2005 not Louisiana, or 2006+)	67	CA: Sacramento County (06067)	Yes	Not CHSDA	Pacific Coast	California	Breast	Malignant	8.4 Carcinoma of breast	Unclassified	XI(f) Other and unspecified carcinomas	Breast	Breast	C50.8-Overlapping lesion of breast	508	8530	Malignant	Moderately differentiated; Grade II	Left - origin of primary	Positive histology	8530/3: Inflammatory carcinoma	8530/3: Inflammatory carcinoma	8500-8549: ductal and lobular neoplasms	Not Brain	XI(f.6) Carcinomas of breast	Female Breast	IIINOS	UNK Stage	UNK Stage	AJCC 6th ed derived from CS manual/coding instructions, v1.0	Blank(s)	Blank(s)	N/A	T4d	NX	M0	T4d	NX	MX	Blank(s)	Blank(s)	Blank(s)	TX Adjusted	NX Adjusted
85+ years	White	Female	2010	California excluding SF/SJM/LA - 2000+	Not applicable (1973-2004, 2005 not Louisiana, or 2006+)	99	CA: Stanislaus County (06099)	Yes	Not CHSDA	Pacific Coast	California	Breast	Malignant	8.4 Carcinoma of breast	Unclassified	XI(f) Other and unspecified carcinomas	Breast	Breast	C50.5-Lower-outer quadrant of breast	505	8530	Malignant	Poorly differentiated; Grade III	Right - origin of primary	Positive histology	8530/3: Inflammatory carcinoma	8530/3: Inflammatory carcinoma	8500-8549: ductal and lobular neoplasms	Not Brain	XI(f.6) Carcinomas of breast	Female Breast	IIIC	IIIC	IIIC	AJCC 6th ed derived from CS manual/coding instructions, v1.0	Blank(s)	Blank(s)	N/A	T4d	N3NOS	M0	T4d	N3NOS	M0	Blank(s)	Blank(s)	Blank(s)	T4d	N3
60-64 years	Other (American Indian/AK Native, Asian/Pacific Islander)	Female	2015	California excluding SF/SJM/LA - 2000+	Not applicable (1973-2004, 2005 not Louisiana, or 2006+)	71	CA: San Bernardino County (06071)	Yes	CHSDA	Pacific Coast	California	Breast	Malignant	8.4 Carcinoma of breast	Unclassified	XI(f) Other and unspecified carcinomas	Breast	Breast	C50.9-Breast, NOS	509	8530	Malignant	Moderately differentiated; Grade II	Right - origin of primary	Positive histology	8530/3: Inflammatory carcinoma	8530/3: Inflammatory carcinoma	8500-8549: ductal and lobular neoplasms	Not Brain	XI(f.6) Carcinomas of breast	Female Breast	IIIB	IIIB	IIIB	AJCC 6th ed derived from CS manual/coding instructions, v1.0	Blank(s)	Blank(s)	N/A	T4d	N0	M0	T4d	N0	M0	Blank(s)	Blank(s)	Blank(s)	T4d	N0
50-54 years	White	Female	2011	California excluding SF/SJM/LA - 2000+	Not applicable (1973-2004, 2005 not Louisiana, or 2006+)	45	CA: Mendocino County (06045)	Yes	CHSDA	Pacific Coast	California	Breast	Malignant	8.4 Carcinoma of breast	Unclassified	XI(f) Other and unspecified carcinomas	Breast	Breast	C50.9-Breast, NOS	509	8530	Malignant	Undifferentiated; anaplastic; Grade IV	Left - origin of primary	Positive histology	8530/3: Inflammatory carcinoma	8530/3: Inflammatory carcinoma	8500-8549: ductal and lobular neoplasms	Not Brain	XI(f.6) Carcinomas of breast	Female Breast	IV	IV	IV	AJCC 6th ed derived from CS manual/coding instructions, v1.0	Blank(s)	Blank(s)	N/A	T4d	N1	M1	T4d	N1	M1	Blank(s)	Blank(s)	Blank(s)	Any T, Mets	N1
40-44 years	White	Female	2011	California excluding SF/SJM/LA - 2000+	Not applicable (1973-2004, 2005 not Louisiana, or 2006+)	111	CA: Ventura County (06111)	Yes	Not CHSDA	Pacific Coast	California	Breast	Malignant	8.4 Carcinoma of breast	Unclassified	XI(f) Other and unspecified carcinomas	Breast	Breast	C50.8-Overlapping lesion of breast	508	8530	Malignant	Moderately differentiated; Grade II	Left - origin of primary	Positive histology	8530/3: Inflammatory carcinoma	8530/3: Inflammatory carcinoma	8500-8549: ductal and lobular neoplasms	Not Brain	XI(f.6) Carcinomas of breast	Female Breast	IIIB	IIIB	IIIB	AJCC 6th ed derived from CS manual/coding instructions, v1.0	Blank(s)	Blank(s)	N/A	T4d	N0	M0	T4d	N0	M0	Blank(s)	Blank(s)	Blank(s)	T4d	N0
50-54 years	Black	Female	2011	California excluding SF/SJM/LA - 2000+	Not applicable (1973-2004, 2005 not Louisiana, or 2006+)	71	CA: San Bernardino County (06071)	Yes	CHSDA	Pacific Coast	California	Breast	Malignant	8.4 Carcinoma of breast	Unclassified	XI(f) Other and unspecified carcinomas	Breast	Breast	C50.9-Breast, NOS	509	8530	Malignant	Poorly differentiated; Grade III	Left - origin of primary	Positive histology	8530/3: Inflammatory carcinoma	8530/3: Inflammatory carcinoma	8500-8549: ductal and lobular neoplasms	Not Brain	XI(f.6) Carcinomas of breast	Female Breast	IIIB	IIIB	IIIB	AJCC 6th ed derived from CS manual/coding instructions, v1.0	Blank(s)	Blank(s)	N/A	T4d	N2NOS	M0	T4d	N2NOS	M0	Blank(s)	Blank(s)	Blank(s)	T4d	N2
50-54 years	White	Female	2011	California excluding SF/SJM/LA - 2000+	Not applicable (1973-2004, 2005 not Louisiana, or 2006+)	29	CA: Kern County (06029)	Yes	Not CHSDA	Pacific Coast	California	Breast	Malignant	8.4 Carcinoma of breast	Unclassified	XI(f) Other and unspecified carcinomas	Breast	Breast	C50.4-Upper-outer quadrant of breast	504	8530	Malignant	Moderately differentiated; Grade II	Right - origin of primary	Positive histology	8530/3: Inflammatory carcinoma	8530/3: Inflammatory carcinoma	8500-8549: ductal and lobular neoplasms	Not Brain	XI(f.6) Carcinomas of breast	Female Breast	IV	IV	IV	AJCC 6th ed derived from CS manual/coding instructions, v1.0	Blank(s)	Blank(s)	N/A	T4d	N2NOS	M1	T4d	N2NOS	M1	Blank(s)	Blank(s)	Blank(s)	Any T, Mets	N2
55-59 years	Other (American Indian/AK Native, Asian/Pacific Islander)	Female	2011	California excluding SF/SJM/LA - 2000+	Not applicable (1973-2004, 2005 not Louisiana, or 2006+)	59	CA: Orange County (06059)	Yes	Not CHSDA	Pacific Coast	California	Breast	Malignant	8.4 Carcinoma of breast	Unclassified	XI(f) Other and unspecified carcinomas	Breast	Breast	C50.1-Central portion of breast	501	8530	Malignant	Poorly differentiated; Grade III	Right - origin of primary	Positive histology	8530/3: Inflammatory carcinoma	8530/3: Inflammatory carcinoma	8500-8549: ductal and lobular neoplasms	Not Brain	XI(f.6) Carcinomas of breast	Female Breast	IIIB	IIIB	IIIB	AJCC 6th ed derived from CS manual/coding instructions, v1.0	Blank(s)	Blank(s)	N/A	T4d	N1a	M0	T4d	N1a	M0	Blank(s)	Blank(s)	Blank(s)	T4d	N1
50-54 years	Black	Female	2011	California excluding SF/SJM/LA - 2000+	Not applicable (1973-2004, 2005 not Louisiana, or 2006+)	111	CA: Ventura County (06111)	Yes	Not CHSDA	Pacific Coast	California	Breast	Malignant	8.4 Carcinoma of breast	Unclassified	XI(f) Other and unspecified carcinomas	Breast	Breast	C50.9-Breast, NOS	509	8530	Malignant	Poorly differentiated; Grade III	Left - origin of primary	Positive histology	8530/3: Inflammatory carcinoma	8530/3: Inflammatory carcinoma	8500-8549: ductal and lobular neoplasms	Not Brain	XI(f.6) Carcinomas of breast	Female Breast	IIIB	IIIB	IIIB	AJCC 6th ed derived from CS manual/coding instructions, v1.0	Blank(s)	Blank(s)	N/A	T4d	N2a	M0	T4d	N2a	M0	Blank(s)	Blank(s)	Blank(s)	T4d	N2
50-54 years	White	Female	2011	California excluding SF/SJM/LA - 2000+	Not applicable (1973-2004, 2005 not Louisiana, or 2006+)	73	CA: San Diego County (06073)	Yes	CHSDA	Pacific Coast	California	Breast	Malignant	8.4 Carcinoma of breast	Unclassified	XI(f) Other and unspecified carcinomas	Breast	Breast	C50.9-Breast, NOS	509	8530	Malignant	Poorly differentiated; Grade III	Left - origin of primary	Positive histology	8530/3: Inflammatory carcinoma	8530/3: Inflammatory carcinoma	8500-8549: ductal and lobular neoplasms	Not Brain	XI(f.6) Carcinomas of breast	Female Breast	IV	IV	IV	AJCC 6th ed derived from CS manual/coding instructions, v1.0	Blank(s)	Blank(s)	N/A	T4d	NX	M1	T4d	NX	M1	Blank(s)	Blank(s)	Blank(s)	Any T, Mets	NX Adjusted
55-59 years	White	Female	2010	California excluding SF/SJM/LA - 2000+	Not applicable (1973-2004, 2005 not Louisiana, or 2006+)	29	CA: Kern County (06029)	Yes	Not CHSDA	Pacific Coast	California	Breast	Malignant	8.4 Carcinoma of breast	Unclassified	XI(f) Other and unspecified carcinomas	Breast	Breast	C50.4-Upper-outer quadrant of breast	504	8530	Malignant	Unknown	Right - origin of primary	Positive histology	8530/3: Inflammatory carcinoma	8530/3: Inflammatory carcinoma	8500-8549: ductal and lobular neoplasms	Not Brain	XI(f.6) Carcinomas of breast	Female Breast	IIINOS	IIINOS	IIINOS	AJCC 6th ed derived from CS manual/coding instructions, v1.0	Blank(s)	Blank(s)	N/A	T4d	NX	M0	T4d	NX	M0	Blank(s)	Blank(s)	Blank(s)	T4d	NX Adjusted
55-59 years	White	Female	2011	California excluding SF/SJM/LA - 2000+	Not applicable (1973-2004, 2005 not Louisiana, or 2006+)	65	CA: Riverside County (06065)	Yes	CHSDA	Pacific Coast	California	Breast	Malignant	8.4 Carcinoma of breast	Unclassified	XI(f) Other and unspecified carcinomas	Breast	Breast	C50.9-Breast, NOS	509	8530	Malignant	Unknown	Right - origin of primary	Positive histology	8530/3: Inflammatory carcinoma	8530/3: Inflammatory carcinoma	8500-8549: ductal and lobular neoplasms	Not Brain	XI(f.6) Carcinomas of breast	Female Breast	IIIB	IIIB	IIIB	AJCC 6th ed derived from CS manual/coding instructions, v1.0	Blank(s)	Blank(s)	N/A	T4d	N1	M0	T4d	N1	M0	Blank(s)	Blank(s)	Blank(s)	T4d	N1
80-84 years	White	Female	2010	California excluding SF/SJM/LA - 2000+	Not applicable (1973-2004, 2005 not Louisiana, or 2006+)	43	CA: Mariposa County (06043)	Yes	CHSDA	Pacific Coast	California	Breast	Malignant	8.4 Carcinoma of breast	Unclassified	XI(f) Other and unspecified carcinomas	Breast	Breast	C50.9-Breast, NOS	509	8530	Malignant	Moderately differentiated; Grade II	Left - origin of primary	Positive histology	8530/3: Inflammatory carcinoma	8530/3: Inflammatory carcinoma	8500-8549: ductal and lobular neoplasms	Not Brain	XI(f.6) Carcinomas of breast	Female Breast	IIIB	IIIB	IIIB	AJCC 6th ed derived from CS manual/coding instructions, v1.0	Blank(s)	Blank(s)	N/A	T4d	N0	M0	T4d	N0	M0	Blank(s)	Blank(s)	Blank(s)	T4d	N0
60-64 years	White	Female	2011	California excluding SF/SJM/LA - 2000+	Not applicable (1973-2004, 2005 not Louisiana, or 2006+)	59	CA: Orange County (06059)	Yes	Not CHSDA	Pacific Coast	California	Breast	Malignant	8.4 Carcinoma of breast	Unclassified	XI(f) Other and unspecified carcinomas	Breast	Breast	C50.9-Breast, NOS	509	8530	Malignant	Poorly differentiated; Grade III	Right - origin of primary	Positive exfoliative cytology, no positive histology	8530/3: Inflammatory carcinoma	8530/3: Inflammatory carcinoma	8500-8549: ductal and lobular neoplasms	Not Brain	XI(f.6) Carcinomas of breast	Female Breast	IV	IV	IV	AJCC 6th ed derived from CS manual/coding instructions, v1.0	Blank(s)	Blank(s)	N/A	T4d	N3b	M1	T4d	N3b	M1	Blank(s)	Blank(s)	Blank(s)	Any T, Mets	N3
50-54 years	Black	Female	2011	California excluding SF/SJM/LA - 2000+	Not applicable (1973-2004, 2005 not Louisiana, or 2006+)	73	CA: San Diego County (06073)	Yes	CHSDA	Pacific Coast	California	Breast	Malignant	8.4 Carcinoma of breast	Unclassified	XI(f) Other and unspecified carcinomas	Breast	Breast	C50.9-Breast, NOS	509	8530	Malignant	Unknown	Right - origin of primary	Positive histology	8530/3: Inflammatory carcinoma	8530/3: Inflammatory carcinoma	8500-8549: ductal and lobular neoplasms	Not Brain	XI(f.6) Carcinomas of breast	Female Breast	IIIB	IIIB	IIIB	AJCC 6th ed derived from CS manual/coding instructions, v1.0	Blank(s)	Blank(s)	N/A	T4d	N2a	M0	T4d	N2a	M0	Blank(s)	Blank(s)	Blank(s)	T4d	N2
40-44 years	White	Female	2011	California excluding SF/SJM/LA - 2000+	Not applicable (1973-2004, 2005 not Louisiana, or 2006+)	59	CA: Orange County (06059)	Yes	Not CHSDA	Pacific Coast	California	Breast	Malignant	8.4 Carcinoma of breast	Unclassified	XI(f) Other and unspecified carcinomas	Breast	Breast	C50.9-Breast, NOS	509	8530	Malignant	Unknown	Bilateral, single primary	Positive histology	8530/3: Inflammatory carcinoma	8530/3: Inflammatory carcinoma	8500-8549: ductal and lobular neoplasms	Not Brain	XI(f.6) Carcinomas of breast	Female Breast	IV	IV	IV	AJCC 6th ed derived from CS manual/coding instructions, v1.0	Blank(s)	Blank(s)	N/A	T4d	N3c	M1	T4d	N3c	M1	Blank(s)	Blank(s)	Blank(s)	Any T, Mets	N3
60-64 years	White	Female	2011	California excluding SF/SJM/LA - 2000+	Not applicable (1973-2004, 2005 not Louisiana, or 2006+)	71	CA: San Bernardino County (06071)	Yes	CHSDA	Pacific Coast	California	Breast	Malignant	8.4 Carcinoma of breast	Unclassified	XI(f) Other and unspecified carcinomas	Breast	Breast	C50.9-Breast, NOS	509	8530	Malignant	Unknown	Left - origin of primary	Positive histology	8530/3: Inflammatory carcinoma	8530/3: Inflammatory carcinoma	8500-8549: ductal and lobular neoplasms	Not Brain	XI(f.6) Carcinomas of breast	Female Breast	IIIB	IIIB	IIIB	AJCC 6th ed derived from CS manual/coding instructions, v1.0	Blank(s)	Blank(s)	N/A	T4d	N0	M0	T4d	N0	M0	Blank(s)	Blank(s)	Blank(s)	T4d	N0
50-54 years	White	Female	2010	California excluding SF/SJM/LA - 2000+	Not applicable (1973-2004, 2005 not Louisiana, or 2006+)	97	CA: Sonoma County (06097)	Yes	CHSDA	Pacific Coast	California	Breast	Malignant	8.4 Carcinoma of breast	Unclassified	XI(f) Other and unspecified carcinomas	Breast	Breast	C50.9-Breast, NOS	509	8530	Malignant	Poorly differentiated; Grade III	Left - origin of primary	Positive histology	8530/3: Inflammatory carcinoma	8530/3: Inflammatory carcinoma	8500-8549: ductal and lobular neoplasms	Not Brain	XI(f.6) Carcinomas of breast	Female Breast	IIIB	IIIB	IIIB	AJCC 6th ed derived from CS manual/coding instructions, v1.0	Blank(s)	Blank(s)	N/A	T4d	N1	M0	T4d	N1	M0	Blank(s)	Blank(s)	Blank(s)	T4d	N1
30-34 years	White	Female	2011	California excluding SF/SJM/LA - 2000+	Not applicable (1973-2004, 2005 not Louisiana, or 2006+)	73	CA: San Diego County (06073)	Yes	CHSDA	Pacific Coast	California	Breast	Malignant	8.4 Carcinoma of breast	Unclassified	XI(f) Other and unspecified carcinomas	Breast	Breast	C50.9-Breast, NOS	509	8530	Malignant	Poorly differentiated; Grade III	Right - origin of primary	Positive histology	8530/3: Inflammatory carcinoma	8530/3: Inflammatory carcinoma	8500-8549: ductal and lobular neoplasms	Not Brain	XI(f.6) Carcinomas of breast	Female Breast	IIIC	IIIC	IIIC	AJCC 6th ed derived from CS manual/coding instructions, v1.0	Blank(s)	Blank(s)	N/A	T4d	N3b	M0	T4d	N3b	M0	Blank(s)	Blank(s)	Blank(s)	T4d	N3
40-44 years	White	Female	2011	California excluding SF/SJM/LA - 2000+	Not applicable (1973-2004, 2005 not Louisiana, or 2006+)	7	CA: Butte County (06007)	Yes	CHSDA	Pacific Coast	California	Breast	Malignant	8.4 Carcinoma of breast	Unclassified	XI(f) Other and unspecified carcinomas	Breast	Breast	C50.5-Lower-outer quadrant of breast	505	8530	Malignant	Poorly differentiated; Grade III	Right - origin of primary	Positive histology	8530/3: Inflammatory carcinoma	8530/3: Inflammatory carcinoma	8500-8549: ductal and lobular neoplasms	Not Brain	XI(f.6) Carcinomas of breast	Female Breast	IIIB	IIIB	IIIB	AJCC 6th ed derived from CS manual/coding instructions, v1.0	Blank(s)	Blank(s)	N/A	T4d	N1	M0	T4d	N1	M0	Blank(s)	Blank(s)	Blank(s)	T4d	N1
50-54 years	White	Female	2011	California excluding SF/SJM/LA - 2000+	Not applicable (1973-2004, 2005 not Louisiana, or 2006+)	103	CA: Tehama County (06103)	Yes	CHSDA	Pacific Coast	California	Breast	Malignant	8.4 Carcinoma of breast	Unclassified	XI(f) Other and unspecified carcinomas	Breast	Breast	C50.8-Overlapping lesion of breast	508	8530	Malignant	Moderately differentiated; Grade II	Left - origin of primary	Positive histology	8530/3: Inflammatory carcinoma	8530/3: Inflammatory carcinoma	8500-8549: ductal and lobular neoplasms	Not Brain	XI(f.6) Carcinomas of breast	Female Breast	IIIB	IIIB	IIIB	AJCC 6th ed derived from CS manual/coding instructions, v1.0	Blank(s)	Blank(s)	N/A	T4d	N2a	M0	T4d	N2a	M0	Blank(s)	Blank(s)	Blank(s)	T4d	N2
45-49 years	White	Female	2011	California excluding SF/SJM/LA - 2000+	Not applicable (1973-2004, 2005 not Louisiana, or 2006+)	73	CA: San Diego County (06073)	Yes	CHSDA	Pacific Coast	California	Breast	Malignant	8.4 Carcinoma of breast	Unclassified	XI(f) Other and unspecified carcinomas	Breast	Breast	C50.9-Breast, NOS	509	8530	Malignant	Poorly differentiated; Grade III	Left - origin of primary	Positive histology	8530/3: Inflammatory carcinoma	8530/3: Inflammatory carcinoma	8500-8549: ductal and lobular neoplasms	Not Brain	XI(f.6) Carcinomas of breast	Female Breast	IIIC	IIIC	IIIC	AJCC 6th ed derived from CS manual/coding instructions, v1.0	Blank(s)	Blank(s)	N/A	T4d	N3a	M0	T4d	N3a	M0	Blank(s)	Blank(s)	Blank(s)	T4d	N3
65-69 years	White	Female	2011	California excluding SF/SJM/LA - 2000+	Not applicable (1973-2004, 2005 not Louisiana, or 2006+)	7	CA: Butte County (06007)	Yes	CHSDA	Pacific Coast	California	Breast	Malignant	8.4 Carcinoma of breast	Unclassified	XI(f) Other and unspecified carcinomas	Breast	Breast	C50.9-Breast, NOS	509	8530	Malignant	Poorly differentiated; Grade III	Left - origin of primary	Positive histology	8530/3: Inflammatory carcinoma	8530/3: Inflammatory carcinoma	8500-8549: ductal and lobular neoplasms	Not Brain	XI(f.6) Carcinomas of breast	Female Breast	IIIC	IIIC	IIIC	AJCC 6th ed derived from CS manual/coding instructions, v1.0	Blank(s)	Blank(s)	N/A	T4d	N3c	M0	T4d	N3c	M0	Blank(s)	Blank(s)	Blank(s)	T4d	N3
45-49 years	Other (American Indian/AK Native, Asian/Pacific Islander)	Female	2011	California excluding SF/SJM/LA - 2000+	Not applicable (1973-2004, 2005 not Louisiana, or 2006+)	71	CA: San Bernardino County (06071)	Yes	CHSDA	Pacific Coast	California	Breast	Malignant	8.4 Carcinoma of breast	Unclassified	XI(f) Other and unspecified carcinomas	Breast	Breast	C50.9-Breast, NOS	509	8530	Malignant	Poorly differentiated; Grade III	Left - origin of primary	Positive histology	8530/3: Inflammatory carcinoma	8530/3: Inflammatory carcinoma	8500-8549: ductal and lobular neoplasms	Not Brain	XI(f.6) Carcinomas of breast	Female Breast	IV	IV	IV	AJCC 6th ed derived from CS manual/coding instructions, v1.0	Blank(s)	Blank(s)	N/A	T4d	N2a	M1	T4d	N2a	M1	Blank(s)	Blank(s)	Blank(s)	Any T, Mets	N3
50-54 years	White	Female	2011	California excluding SF/SJM/LA - 2000+	Not applicable (1973-2004, 2005 not Louisiana, or 2006+)	59	CA: Orange County (06059)	Yes	Not CHSDA	Pacific Coast	California	Breast	Malignant	8.4 Carcinoma of breast	Unclassified	XI(f) Other and unspecified carcinomas	Breast	Breast	C50.8-Overlapping lesion of breast	508	8530	Malignant	Poorly differentiated; Grade III	Left - origin of primary	Positive histology	8530/3: Inflammatory carcinoma	8530/3: Inflammatory carcinoma	8500-8549: ductal and lobular neoplasms	Not Brain	XI(f.6) Carcinomas of breast	Female Breast	IIIB	IIIB	IIIB	AJCC 6th ed derived from CS manual/coding instructions, v1.0	Blank(s)	Blank(s)	N/A	T4d	N1	M0	T4d	N1	M0	Blank(s)	Blank(s)	Blank(s)	T4d	N1
60-64 years	White	Female	2012	California excluding SF/SJM/LA - 2000+	Not applicable (1973-2004, 2005 not Louisiana, or 2006+)	71	CA: San Bernardino County (06071)	Yes	CHSDA	Pacific Coast	California	Breast	Malignant	8.4 Carcinoma of breast	Unclassified	XI(f) Other and unspecified carcinomas	Breast	Breast	C50.4-Upper-outer quadrant of breast	504	8530	Malignant	Unknown	Left - origin of primary	Positive histology	8530/3: Inflammatory carcinoma	8530/3: Inflammatory carcinoma	8500-8549: ductal and lobular neoplasms	Not Brain	XI(f.6) Carcinomas of breast	Female Breast	IIIB	IIIB	IIIB	AJCC 6th ed derived from CS manual/coding instructions, v1.0	Blank(s)	Blank(s)	N/A	T4d	N1NOS	M0	T4d	N1NOS	M0	Blank(s)	Blank(s)	Blank(s)	T4d	N1
60-64 years	White	Female	2012	California excluding SF/SJM/LA - 2000+	Not applicable (1973-2004, 2005 not Louisiana, or 2006+)	71	CA: San Bernardino County (06071)	Yes	CHSDA	Pacific Coast	California	Breast	Malignant	8.4 Carcinoma of breast	Unclassified	XI(f) Other and unspecified carcinomas	Breast	Breast	C50.9-Breast, NOS	509	8530	Malignant	Unknown	Right - origin of primary	Positive histology	8530/3: Inflammatory carcinoma	8530/3: Inflammatory carcinoma	8500-8549: ductal and lobular neoplasms	Not Brain	XI(f.6) Carcinomas of breast	Female Breast	IIIC	IIIC	IIIC	AJCC 6th ed derived from CS manual/coding instructions, v1.0	Blank(s)	Blank(s)	N/A	T4d	N3NOS	M0	T4d	N3NOS	M0	Blank(s)	Blank(s)	Blank(s)	T4d	N3
85+ years	White	Female	2012	California excluding SF/SJM/LA - 2000+	Not applicable (1973-2004, 2005 not Louisiana, or 2006+)	17	CA: El Dorado County (06017)	Yes	CHSDA	Pacific Coast	California	Breast	Malignant	8.4 Carcinoma of breast	Unclassified	XI(f) Other and unspecified carcinomas	Breast	Breast	C50.1-Central portion of breast	501	8530	Malignant	Poorly differentiated; Grade III	Left - origin of primary	Positive histology	8530/3: Inflammatory carcinoma	8530/3: Inflammatory carcinoma	8500-8549: ductal and lobular neoplasms	Not Brain	XI(f.6) Carcinomas of breast	Female Breast	IV	IV	IV	AJCC 6th ed derived from CS manual/coding instructions, v1.0	Blank(s)	Blank(s)	N/A	T4d	N3NOS	M1	T4d	N3NOS	M1	Blank(s)	Blank(s)	Blank(s)	Any T, Mets	N3
70-74 years	White	Female	2012	California excluding SF/SJM/LA - 2000+	Not applicable (1973-2004, 2005 not Louisiana, or 2006+)	89	CA: Shasta County (06089)	Yes	CHSDA	Pacific Coast	California	Breast	Malignant	8.4 Carcinoma of breast	Unclassified	XI(f) Other and unspecified carcinomas	Breast	Breast	C50.4-Upper-outer quadrant of breast	504	8530	Malignant	Poorly differentiated; Grade III	Left - origin of primary	Positive histology	8530/3: Inflammatory carcinoma	8530/3: Inflammatory carcinoma	8500-8549: ductal and lobular neoplasms	Not Brain	XI(f.6) Carcinomas of breast	Female Breast	IIIB	IIIB	IIIB	AJCC 6th ed derived from CS manual/coding instructions, v1.0	Blank(s)	Blank(s)	N/A	T4d	N0	M0	T4d	N0	M0	Blank(s)	Blank(s)	Blank(s)	T4d	N0
55-59 years	White	Female	2012	California excluding SF/SJM/LA - 2000+	Not applicable (1973-2004, 2005 not Louisiana, or 2006+)	59	CA: Orange County (06059)	Yes	Not CHSDA	Pacific Coast	California	Breast	Malignant	8.4 Carcinoma of breast	Unclassified	XI(f) Other and unspecified carcinomas	Breast	Breast	C50.4-Upper-outer quadrant of breast	504	8530	Malignant	Undifferentiated; anaplastic; Grade IV	Right - origin of primary	Positive histology	8530/3: Inflammatory carcinoma	8530/3: Inflammatory carcinoma	8500-8549: ductal and lobular neoplasms	Not Brain	XI(f.6) Carcinomas of breast	Female Breast	IV	IV	IV	AJCC 6th ed derived from CS manual/coding instructions, v1.0	Blank(s)	Blank(s)	N/A	T4d	N3NOS	M1	T4d	N3NOS	M1	Blank(s)	Blank(s)	Blank(s)	Any T, Mets	N3
50-54 years	White	Female	2012	California excluding SF/SJM/LA - 2000+	Not applicable (1973-2004, 2005 not Louisiana, or 2006+)	111	CA: Ventura County (06111)	Yes	Not CHSDA	Pacific Coast	California	Breast	Malignant	8.4 Carcinoma of breast	Unclassified	XI(f) Other and unspecified carcinomas	Breast	Breast	C50.8-Overlapping lesion of breast	508	8530	Malignant	Moderately differentiated; Grade II	Left - origin of primary	Positive histology	8530/3: Inflammatory carcinoma	8530/3: Inflammatory carcinoma	8500-8549: ductal and lobular neoplasms	Not Brain	XI(f.6) Carcinomas of breast	Female Breast	IIIB	IIIB	IIIB	AJCC 6th ed derived from CS manual/coding instructions, v1.0	Blank(s)	Blank(s)	N/A	T4d	N0(i-)	M0	T4d	N0(i-)	M0	Blank(s)	Blank(s)	Blank(s)	T4d	N0
25-29 years	White	Female	2012	California excluding SF/SJM/LA - 2000+	Not applicable (1973-2004, 2005 not Louisiana, or 2006+)	71	CA: San Bernardino County (06071)	Yes	CHSDA	Pacific Coast	California	Breast	Malignant	8.4 Carcinoma of breast	Unclassified	XI(f) Other and unspecified carcinomas	Breast	Breast	C50.9-Breast, NOS	509	8530	Malignant	Poorly differentiated; Grade III	Left - origin of primary	Positive histology	8530/3: Inflammatory carcinoma	8530/3: Inflammatory carcinoma	8500-8549: ductal and lobular neoplasms	Not Brain	XI(f.6) Carcinomas of breast	Female Breast	IIIB	IIIB	IIIB	AJCC 6th ed derived from CS manual/coding instructions, v1.0	Blank(s)	Blank(s)	N/A	T4d	N1	M0	T4d	N1	M0	Blank(s)	Blank(s)	Blank(s)	T4d	N1
50-54 years	White	Female	2011	California excluding SF/SJM/LA - 2000+	Not applicable (1973-2004, 2005 not Louisiana, or 2006+)	71	CA: San Bernardino County (06071)	Yes	CHSDA	Pacific Coast	California	Breast	Malignant	8.4 Carcinoma of breast	Unclassified	XI(f) Other and unspecified carcinomas	Breast	Breast	C50.9-Breast, NOS	509	8530	Malignant	Poorly differentiated; Grade III	Left - origin of primary	Positive histology	8530/3: Inflammatory carcinoma	8530/3: Inflammatory carcinoma	8500-8549: ductal and lobular neoplasms	Not Brain	XI(f.6) Carcinomas of breast	Female Breast	IIIB	UNK Stage	UNK Stage	AJCC 6th ed derived from CS manual/coding instructions, v1.0	Blank(s)	Blank(s)	N/A	T4d	N0	M0	T4d	N0	MX	Blank(s)	Blank(s)	Blank(s)	TX Adjusted	NX Adjusted
40-44 years	Black	Female	2011	California excluding SF/SJM/LA - 2000+	Not applicable (1973-2004, 2005 not Louisiana, or 2006+)	67	CA: Sacramento County (06067)	Yes	Not CHSDA	Pacific Coast	California	Breast	Malignant	8.4 Carcinoma of breast	Unclassified	XI(f) Other and unspecified carcinomas	Breast	Breast	C50.9-Breast, NOS	509	8530	Malignant	Moderately differentiated; Grade II	Left - origin of primary	Positive histology	8530/3: Inflammatory carcinoma	8530/3: Inflammatory carcinoma	8500-8549: ductal and lobular neoplasms	Not Brain	XI(f.6) Carcinomas of breast	Female Breast	IV	IV	IV	AJCC 6th ed derived from CS manual/coding instructions, v1.0	Blank(s)	Blank(s)	N/A	T4d	N1	M1	T4d	N1	M1	Blank(s)	Blank(s)	Blank(s)	Any T, Mets	N1
65-69 years	White	Female	2012	California excluding SF/SJM/LA - 2000+	Not applicable (1973-2004, 2005 not Louisiana, or 2006+)	5	CA: Amador County (06005)	Yes	CHSDA	Pacific Coast	California	Breast	Malignant	8.4 Carcinoma of breast	Unclassified	XI(f) Other and unspecified carcinomas	Breast	Breast	C50.4-Upper-outer quadrant of breast	504	8530	Malignant	Poorly differentiated; Grade III	Left - origin of primary	Positive histology	8530/3: Inflammatory carcinoma	8530/3: Inflammatory carcinoma	8500-8549: ductal and lobular neoplasms	Not Brain	XI(f.6) Carcinomas of breast	Female Breast	IV	IV	IIIC	AJCC 6th ed derived from CS manual/coding instructions, v1.0	Blank(s)	Blank(s)	N/A	T4d	N1	M1	T4d	N1	M1	Blank(s)	Blank(s)	Blank(s)	T4d	N3
65-69 years	White	Female	2012	California excluding SF/SJM/LA - 2000+	Not applicable (1973-2004, 2005 not Louisiana, or 2006+)	19	CA: Fresno County (06019)	Yes	CHSDA	Pacific Coast	California	Breast	Malignant	8.4 Carcinoma of breast	Unclassified	XI(f) Other and unspecified carcinomas	Breast	Breast	C50.1-Central portion of breast	501	8530	Malignant	Poorly differentiated; Grade III	Left - origin of primary	Positive histology	8530/3: Inflammatory carcinoma	8530/3: Inflammatory carcinoma	8500-8549: ductal and lobular neoplasms	Not Brain	XI(f.6) Carcinomas of breast	Female Breast	IIIB	IIIB	IIIB	AJCC 6th ed derived from CS manual/coding instructions, v1.0	Blank(s)	Blank(s)	N/A	T4d	N1	M0	T4d	N1	M0	Blank(s)	Blank(s)	Blank(s)	T4d	N1
50-54 years	Other (American Indian/AK Native, Asian/Pacific Islander)	Female	2011	California excluding SF/SJM/LA - 2000+	Not applicable (1973-2004, 2005 not Louisiana, or 2006+)	95	CA: Solano County (06095)	Yes	Not CHSDA	Pacific Coast	California	Breast	Malignant	8.4 Carcinoma of breast	Unclassified	XI(f) Other and unspecified carcinomas	Breast	Breast	C50.9-Breast, NOS	509	8530	Malignant	Poorly differentiated; Grade III	Left - origin of primary	Positive histology	8530/3: Inflammatory carcinoma	8530/3: Inflammatory carcinoma	8500-8549: ductal and lobular neoplasms	Not Brain	XI(f.6) Carcinomas of breast	Female Breast	IIIB	IIIB	IIIB	AJCC 6th ed derived from CS manual/coding instructions, v1.0	Blank(s)	Blank(s)	N/A	T4d	N1	M0	T4d	N1	M0	Blank(s)	Blank(s)	Blank(s)	T4d	N1
35-39 years	White	Female	2011	California excluding SF/SJM/LA - 2000+	Not applicable (1973-2004, 2005 not Louisiana, or 2006+)	109	CA: Tuolumne County (06109)	Yes	CHSDA	Pacific Coast	California	Breast	Malignant	8.4 Carcinoma of breast	Unclassified	XI(f) Other and unspecified carcinomas	Breast	Breast	C50.8-Overlapping lesion of breast	508	8530	Malignant	Unknown	Left - origin of primary	Positive histology	8530/3: Inflammatory carcinoma	8530/3: Inflammatory carcinoma	8500-8549: ductal and lobular neoplasms	Not Brain	XI(f.6) Carcinomas of breast	Female Breast	IIIB	IIIB	IIIB	AJCC 6th ed derived from CS manual/coding instructions, v1.0	Blank(s)	Blank(s)	N/A	T4d	N1	M0	T4d	N1	M0	Blank(s)	Blank(s)	Blank(s)	T4d	N1
70-74 years	Other (American Indian/AK Native, Asian/Pacific Islander)	Female	2011	California excluding SF/SJM/LA - 2000+	Not applicable (1973-2004, 2005 not Louisiana, or 2006+)	5	CA: Amador County (06005)	Yes	CHSDA	Pacific Coast	California	Breast	Malignant	8.4 Carcinoma of breast	Unclassified	XI(f) Other and unspecified carcinomas	Breast	Breast	C50.9-Breast, NOS	509	8530	Malignant	Poorly differentiated; Grade III	Right - origin of primary	Positive histology	8530/3: Inflammatory carcinoma	8530/3: Inflammatory carcinoma	8500-8549: ductal and lobular neoplasms	Not Brain	XI(f.6) Carcinomas of breast	Female Breast	IIINOS	IIINOS	IIINOS	AJCC 6th ed derived from CS manual/coding instructions, v1.0	Blank(s)	Blank(s)	N/A	T4d	NX	M0	T4d	NX	M0	Blank(s)	Blank(s)	Blank(s)	T4d	NX Adjusted
50-54 years	White	Female	2012	California excluding SF/SJM/LA - 2000+	Not applicable (1973-2004, 2005 not Louisiana, or 2006+)	97	CA: Sonoma County (06097)	Yes	CHSDA	Pacific Coast	California	Breast	Malignant	8.4 Carcinoma of breast	Unclassified	XI(f) Other and unspecified carcinomas	Breast	Breast	C50.4-Upper-outer quadrant of breast	504	8530	Malignant	Moderately differentiated; Grade II	Left - origin of primary	Positive histology	8530/3: Inflammatory carcinoma	8530/3: Inflammatory carcinoma	8500-8549: ductal and lobular neoplasms	Not Brain	XI(f.6) Carcinomas of breast	Female Breast	IV	IV	IV	AJCC 6th ed derived from CS manual/coding instructions, v1.0	Blank(s)	Blank(s)	N/A	T4d	N1	M1	T4d	N1	M1	Blank(s)	Blank(s)	Blank(s)	Any T, Mets	N3
65-69 years	Black	Female	2012	California excluding SF/SJM/LA - 2000+	Not applicable (1973-2004, 2005 not Louisiana, or 2006+)	95	CA: Solano County (06095)	Yes	Not CHSDA	Pacific Coast	California	Breast	Malignant	8.4 Carcinoma of breast	Unclassified	XI(f) Other and unspecified carcinomas	Breast	Breast	C50.8-Overlapping lesion of breast	508	8530	Malignant	Moderately differentiated; Grade II	Right - origin of primary	Positive histology	8530/3: Inflammatory carcinoma	8530/3: Inflammatory carcinoma	8500-8549: ductal and lobular neoplasms	Not Brain	XI(f.6) Carcinomas of breast	Female Breast	IIIB	IIIB	IIIB	AJCC 6th ed derived from CS manual/coding instructions, v1.0	Blank(s)	Blank(s)	N/A	T4d	N1	M0	T4d	N1	M0	Blank(s)	Blank(s)	Blank(s)	T4d	N1
50-54 years	White	Female	2012	California excluding SF/SJM/LA - 2000+	Not applicable (1973-2004, 2005 not Louisiana, or 2006+)	29	CA: Kern County (06029)	Yes	Not CHSDA	Pacific Coast	California	Breast	Malignant	8.4 Carcinoma of breast	Unclassified	XI(f) Other and unspecified carcinomas	Breast	Breast	C50.9-Breast, NOS	509	8530	Malignant	Moderately differentiated; Grade II	Right - origin of primary	Positive histology	8530/3: Inflammatory carcinoma	8530/3: Inflammatory carcinoma	8500-8549: ductal and lobular neoplasms	Not Brain	XI(f.6) Carcinomas of breast	Female Breast	IIIB	IIIB	IIIB	AJCC 6th ed derived from CS manual/coding instructions, v1.0	Blank(s)	Blank(s)	N/A	T4d	N2a	M0	T4d	N2a	M0	Blank(s)	Blank(s)	Blank(s)	T4d	N2
70-74 years	White	Female	2012	California excluding SF/SJM/LA - 2000+	Not applicable (1973-2004, 2005 not Louisiana, or 2006+)	59	CA: Orange County (06059)	Yes	Not CHSDA	Pacific Coast	California	Breast	Malignant	8.4 Carcinoma of breast	Unclassified	XI(f) Other and unspecified carcinomas	Breast	Breast	C50.4-Upper-outer quadrant of breast	504	8530	Malignant	Moderately differentiated; Grade II	Left - origin of primary	Positive histology	8530/3: Inflammatory carcinoma	8530/3: Inflammatory carcinoma	8500-8549: ductal and lobular neoplasms	Not Brain	XI(f.6) Carcinomas of breast	Female Breast	IIIB	IIIB	IIIB	AJCC 6th ed derived from CS manual/coding instructions, v1.0	Blank(s)	Blank(s)	N/A	T4d	N1	M0	T4d	N1	M0	Blank(s)	Blank(s)	Blank(s)	T4d	N1
65-69 years	White	Female	2012	California excluding SF/SJM/LA - 2000+	Not applicable (1973-2004, 2005 not Louisiana, or 2006+)	59	CA: Orange County (06059)	Yes	Not CHSDA	Pacific Coast	California	Breast	Malignant	8.4 Carcinoma of breast	Unclassified	XI(f) Other and unspecified carcinomas	Breast	Breast	C50.8-Overlapping lesion of breast	508	8530	Malignant	Poorly differentiated; Grade III	Right - origin of primary	Positive histology	8530/3: Inflammatory carcinoma	8530/3: Inflammatory carcinoma	8500-8549: ductal and lobular neoplasms	Not Brain	XI(f.6) Carcinomas of breast	Female Breast	IV	IV	IV	AJCC 6th ed derived from CS manual/coding instructions, v1.0	Blank(s)	Blank(s)	N/A	T4d	N1	M1	T4d	N1	M1	Blank(s)	Blank(s)	Blank(s)	Any T, Mets	N1
35-39 years	White	Female	2012	California excluding SF/SJM/LA - 2000+	Not applicable (1973-2004, 2005 not Louisiana, or 2006+)	65	CA: Riverside County (06065)	Yes	CHSDA	Pacific Coast	California	Breast	Malignant	8.4 Carcinoma of breast	Unclassified	XI(f) Other and unspecified carcinomas	Breast	Breast	C50.9-Breast, NOS	509	8530	Malignant	Unknown	Right - origin of primary	Positive histology	8530/3: Inflammatory carcinoma	8530/3: Inflammatory carcinoma	8500-8549: ductal and lobular neoplasms	Not Brain	XI(f.6) Carcinomas of breast	Female Breast	IV	IV	IV	AJCC 6th ed derived from CS manual/coding instructions, v1.0	Blank(s)	Blank(s)	N/A	T4d	N3NOS	M1	T4d	N3NOS	M1	Blank(s)	Blank(s)	Blank(s)	Any T, Mets	N3
70-74 years	White	Female	2012	California excluding SF/SJM/LA - 2000+	Not applicable (1973-2004, 2005 not Louisiana, or 2006+)	99	CA: Stanislaus County (06099)	Yes	Not CHSDA	Pacific Coast	California	Breast	Malignant	8.4 Carcinoma of breast	Unclassified	XI(f) Other and unspecified carcinomas	Breast	Breast	C50.9-Breast, NOS	509	8530	Malignant	Poorly differentiated; Grade III	Right - origin of primary	Positive histology	8530/3: Inflammatory carcinoma	8530/3: Inflammatory carcinoma	8500-8549: ductal and lobular neoplasms	Not Brain	XI(f.6) Carcinomas of breast	Female Breast	IIIB	IIIB	IIIB	AJCC 6th ed derived from CS manual/coding instructions, v1.0	Blank(s)	Blank(s)	N/A	T4d	N1a	M0	T4d	N1a	M0	Blank(s)	Blank(s)	Blank(s)	T4d	N1
85+ years	White	Female	2012	California excluding SF/SJM/LA - 2000+	Not applicable (1973-2004, 2005 not Louisiana, or 2006+)	31	CA: Kings County (06031)	Yes	CHSDA	Pacific Coast	California	Breast	Malignant	8.4 Carcinoma of breast	Unclassified	XI(f) Other and unspecified carcinomas	Breast	Breast	C50.9-Breast, NOS	509	8530	Malignant	Moderately differentiated; Grade II	Right - origin of primary	Positive histology	8530/3: Inflammatory carcinoma	8530/3: Inflammatory carcinoma	8500-8549: ductal and lobular neoplasms	Not Brain	XI(f.6) Carcinomas of breast	Female Breast	IIIB	IIIB	IIIB	AJCC 6th ed derived from CS manual/coding instructions, v1.0	Blank(s)	Blank(s)	N/A	T4d	N0	M0	T4d	N0	M0	Blank(s)	Blank(s)	Blank(s)	T4d	N0
60-64 years	White	Female	2011	California excluding SF/SJM/LA - 2000+	Not applicable (1973-2004, 2005 not Louisiana, or 2006+)	111	CA: Ventura County (06111)	Yes	Not CHSDA	Pacific Coast	California	Breast	Malignant	8.4 Carcinoma of breast	Unclassified	XI(f) Other and unspecified carcinomas	Breast	Breast	C50.9-Breast, NOS	509	8530	Malignant	Poorly differentiated; Grade III	Right - origin of primary	Positive histology	8530/3: Inflammatory carcinoma	8530/3: Inflammatory carcinoma	8500-8549: ductal and lobular neoplasms	Not Brain	XI(f.6) Carcinomas of breast	Female Breast	IV	IV	IV	AJCC 6th ed derived from CS manual/coding instructions, v1.0	Blank(s)	Blank(s)	N/A	T4d	N1	M1	T4d	N1	M1	Blank(s)	Blank(s)	Blank(s)	Any T, Mets	N3
80-84 years	White	Female	2012	California excluding SF/SJM/LA - 2000+	Not applicable (1973-2004, 2005 not Louisiana, or 2006+)	111	CA: Ventura County (06111)	Yes	Not CHSDA	Pacific Coast	California	Breast	Malignant	8.4 Carcinoma of breast	Unclassified	XI(f) Other and unspecified carcinomas	Breast	Breast	C50.9-Breast, NOS	509	8530	Malignant	Unknown	Left - origin of primary	Positive histology	8530/3: Inflammatory carcinoma	8530/3: Inflammatory carcinoma	8500-8549: ductal and lobular neoplasms	Not Brain	XI(f.6) Carcinomas of breast	Female Breast	IV	IV	IV	AJCC 6th ed derived from CS manual/coding instructions, v1.0	Blank(s)	Blank(s)	N/A	T4d	NX	M1	T4d	NX	M1	Blank(s)	Blank(s)	Blank(s)	Any T, Mets	NX Adjusted
30-34 years	White	Female	2012	California excluding SF/SJM/LA - 2000+	Not applicable (1973-2004, 2005 not Louisiana, or 2006+)	59	CA: Orange County (06059)	Yes	Not CHSDA	Pacific Coast	California	Breast	Malignant	8.4 Carcinoma of breast	Unclassified	XI(f) Other and unspecified carcinomas	Breast	Breast	C50.9-Breast, NOS	509	8530	Malignant	Moderately differentiated; Grade II	Left - origin of primary	Positive histology	8530/3: Inflammatory carcinoma	8530/3: Inflammatory carcinoma	8500-8549: ductal and lobular neoplasms	Not Brain	XI(f.6) Carcinomas of breast	Female Breast	IIIB	IIIB	IIIB	AJCC 6th ed derived from CS manual/coding instructions, v1.0	Blank(s)	Blank(s)	N/A	T4d	N1	M0	T4d	N1	M0	Blank(s)	Blank(s)	Blank(s)	T4d	N1
60-64 years	White	Female	2012	California excluding SF/SJM/LA - 2000+	Not applicable (1973-2004, 2005 not Louisiana, or 2006+)	65	CA: Riverside County (06065)	Yes	CHSDA	Pacific Coast	California	Breast	Malignant	8.4 Carcinoma of breast	Unclassified	XI(f) Other and unspecified carcinomas	Breast	Breast	C50.9-Breast, NOS	509	8530	Malignant	Moderately differentiated; Grade II	Right - origin of primary	Positive histology	8530/3: Inflammatory carcinoma	8530/3: Inflammatory carcinoma	8500-8549: ductal and lobular neoplasms	Not Brain	XI(f.6) Carcinomas of breast	Female Breast	IIIC	IIIC	IIIC	AJCC 6th ed derived from CS manual/coding instructions, v1.0	Blank(s)	Blank(s)	N/A	T4d	N3a	M0	T4d	N3a	M0	Blank(s)	Blank(s)	Blank(s)	T4d	N3
50-54 years	White	Female	2012	California excluding SF/SJM/LA - 2000+	Not applicable (1973-2004, 2005 not Louisiana, or 2006+)	71	CA: San Bernardino County (06071)	Yes	CHSDA	Pacific Coast	California	Breast	Malignant	8.4 Carcinoma of breast	Unclassified	XI(f) Other and unspecified carcinomas	Breast	Breast	C50.8-Overlapping lesion of breast	508	8530	Malignant	Unknown	Left - origin of primary	Positive histology	8530/3: Inflammatory carcinoma	8530/3: Inflammatory carcinoma	8500-8549: ductal and lobular neoplasms	Not Brain	XI(f.6) Carcinomas of breast	Female Breast	IV	IV	IV	AJCC 6th ed derived from CS manual/coding instructions, v1.0	Blank(s)	Blank(s)	N/A	T4d	N2a	M1	T4d	N2a	M1	Blank(s)	Blank(s)	Blank(s)	Any T, Mets	N2
40-44 years	White	Female	2011	California excluding SF/SJM/LA - 2000+	Not applicable (1973-2004, 2005 not Louisiana, or 2006+)	111	CA: Ventura County (06111)	Yes	Not CHSDA	Pacific Coast	California	Breast	Malignant	8.4 Carcinoma of breast	Unclassified	XI(f) Other and unspecified carcinomas	Breast	Breast	C50.8-Overlapping lesion of breast	508	8530	Malignant	Moderately differentiated; Grade II	Right - origin of primary	Positive histology	8530/3: Inflammatory carcinoma	8530/3: Inflammatory carcinoma	8500-8549: ductal and lobular neoplasms	Not Brain	XI(f.6) Carcinomas of breast	Female Breast	IIIC	IIIC	IIIC	AJCC 6th ed derived from CS manual/coding instructions, v1.0	Blank(s)	Blank(s)	N/A	T4d	N3a	M0	T4d	N3a	M0	Blank(s)	Blank(s)	Blank(s)	T4d	N3
75-79 years	White	Female	2012	California excluding SF/SJM/LA - 2000+	Not applicable (1973-2004, 2005 not Louisiana, or 2006+)	83	CA: Santa Barbara County (06083)	Yes	CHSDA	Pacific Coast	California	Breast	Malignant	8.4 Carcinoma of breast	Unclassified	XI(f) Other and unspecified carcinomas	Breast	Breast	C50.9-Breast, NOS	509	8530	Malignant	Poorly differentiated; Grade III	Left - origin of primary	Positive histology	8530/3: Inflammatory carcinoma	8530/3: Inflammatory carcinoma	8500-8549: ductal and lobular neoplasms	Not Brain	XI(f.6) Carcinomas of breast	Female Breast	IV	IV	IV	AJCC 6th ed derived from CS manual/coding instructions, v1.0	Blank(s)	Blank(s)	N/A	T4d	N3a	M1	T4d	N3a	M1	Blank(s)	Blank(s)	Blank(s)	Any T, Mets	N3
55-59 years	White	Female	2011	California excluding SF/SJM/LA - 2000+	Not applicable (1973-2004, 2005 not Louisiana, or 2006+)	111	CA: Ventura County (06111)	Yes	Not CHSDA	Pacific Coast	California	Breast	Malignant	8.4 Carcinoma of breast	Unclassified	XI(f) Other and unspecified carcinomas	Breast	Breast	C50.9-Breast, NOS	509	8530	Malignant	Moderately differentiated; Grade II	Left - origin of primary	Positive histology	8530/3: Inflammatory carcinoma	8530/3: Inflammatory carcinoma	8500-8549: ductal and lobular neoplasms	Not Brain	XI(f.6) Carcinomas of breast	Female Breast	IV	IV	IV	AJCC 6th ed derived from CS manual/coding instructions, v1.0	Blank(s)	Blank(s)	N/A	T4d	N0	M1	T4d	N0	M1	Blank(s)	Blank(s)	Blank(s)	Any T, Mets	N0
45-49 years	White	Female	2012	California excluding SF/SJM/LA - 2000+	Not applicable (1973-2004, 2005 not Louisiana, or 2006+)	73	CA: San Diego County (06073)	Yes	CHSDA	Pacific Coast	California	Breast	Malignant	8.4 Carcinoma of breast	Unclassified	XI(f) Other and unspecified carcinomas	Breast	Breast	C50.8-Overlapping lesion of breast	508	8530	Malignant	Unknown	Left - origin of primary	Positive histology	8530/3: Inflammatory carcinoma	8530/3: Inflammatory carcinoma	8500-8549: ductal and lobular neoplasms	Not Brain	XI(f.6) Carcinomas of breast	Female Breast	IIIB	IIIB	IIIB	AJCC 6th ed derived from CS manual/coding instructions, v1.0	Blank(s)	Blank(s)	N/A	T4d	N1a	M0	T4d	N1a	M0	Blank(s)	Blank(s)	Blank(s)	T4d	N1
55-59 years	White	Female	2012	California excluding SF/SJM/LA - 2000+	Not applicable (1973-2004, 2005 not Louisiana, or 2006+)	97	CA: Sonoma County (06097)	Yes	CHSDA	Pacific Coast	California	Breast	Malignant	8.4 Carcinoma of breast	Unclassified	XI(f) Other and unspecified carcinomas	Breast	Breast	C50.9-Breast, NOS	509	8530	Malignant	Poorly differentiated; Grade III	Left - origin of primary	Positive histology	8530/3: Inflammatory carcinoma	8530/3: Inflammatory carcinoma	8500-8549: ductal and lobular neoplasms	Not Brain	XI(f.6) Carcinomas of breast	Female Breast	IV	IV	IIIC	AJCC 6th ed derived from CS manual/coding instructions, v1.0	Blank(s)	Blank(s)	N/A	T4d	N2a	M1	T4d	N2a	M1	Blank(s)	Blank(s)	Blank(s)	T4d	N3
65-69 years	Other (American Indian/AK Native, Asian/Pacific Islander)	Female	2012	California excluding SF/SJM/LA - 2000+	Not applicable (1973-2004, 2005 not Louisiana, or 2006+)	111	CA: Ventura County (06111)	Yes	Not CHSDA	Pacific Coast	California	Breast	Malignant	8.4 Carcinoma of breast	Unclassified	XI(f) Other and unspecified carcinomas	Breast	Breast	C50.9-Breast, NOS	509	8530	Malignant	Unknown	Left - origin of primary	Positive histology	8530/3: Inflammatory carcinoma	8530/3: Inflammatory carcinoma	8500-8549: ductal and lobular neoplasms	Not Brain	XI(f.6) Carcinomas of breast	Female Breast	IV	IV	IV	AJCC 6th ed derived from CS manual/coding instructions, v1.0	Blank(s)	Blank(s)	N/A	T4d	N1	M1	T4d	N1	M1	Blank(s)	Blank(s)	Blank(s)	Any T, Mets	N1
60-64 years	White	Female	2011	California excluding SF/SJM/LA - 2000+	Not applicable (1973-2004, 2005 not Louisiana, or 2006+)	7	CA: Butte County (06007)	Yes	CHSDA	Pacific Coast	California	Breast	Malignant	8.4 Carcinoma of breast	Unclassified	XI(f) Other and unspecified carcinomas	Breast	Breast	C50.8-Overlapping lesion of breast	508	8530	Malignant	Poorly differentiated; Grade III	Right - origin of primary	Positive histology	8530/3: Inflammatory carcinoma	8530/3: Inflammatory carcinoma	8500-8549: ductal and lobular neoplasms	Not Brain	XI(f.6) Carcinomas of breast	Female Breast	IV	IV	IV	AJCC 6th ed derived from CS manual/coding instructions, v1.0	Blank(s)	Blank(s)	N/A	T4d	N3a	M1	T4d	N3a	M1	Blank(s)	Blank(s)	Blank(s)	Any T, Mets	N3
55-59 years	White	Female	2012	California excluding SF/SJM/LA - 2000+	Not applicable (1973-2004, 2005 not Louisiana, or 2006+)	71	CA: San Bernardino County (06071)	Yes	CHSDA	Pacific Coast	California	Breast	Malignant	8.4 Carcinoma of breast	Unclassified	XI(f) Other and unspecified carcinomas	Breast	Breast	C50.8-Overlapping lesion of breast	508	8530	Malignant	Unknown	Left - origin of primary	Positive histology	8530/3: Inflammatory carcinoma	8530/3: Inflammatory carcinoma	8500-8549: ductal and lobular neoplasms	Not Brain	XI(f.6) Carcinomas of breast	Female Breast	IIIB	IIIB	IIIB	AJCC 6th ed derived from CS manual/coding instructions, v1.0	Blank(s)	Blank(s)	N/A	T4d	N2NOS	M0	T4d	N2NOS	M0	Blank(s)	Blank(s)	Blank(s)	T4d	N2
55-59 years	White	Female	2012	California excluding SF/SJM/LA - 2000+	Not applicable (1973-2004, 2005 not Louisiana, or 2006+)	65	CA: Riverside County (06065)	Yes	CHSDA	Pacific Coast	California	Breast	Malignant	8.4 Carcinoma of breast	Unclassified	XI(f) Other and unspecified carcinomas	Breast	Breast	C50.2-Upper-inner quadrant of breast	502	8530	Malignant	Unknown	Right - origin of primary	Positive histology	8530/3: Inflammatory carcinoma	8530/3: Inflammatory carcinoma	8500-8549: ductal and lobular neoplasms	Not Brain	XI(f.6) Carcinomas of breast	Female Breast	IIIB	IIIB	IIIB	AJCC 6th ed derived from CS manual/coding instructions, v1.0	Blank(s)	Blank(s)	N/A	T4d	N1a	M0	T4d	N1a	M0	Blank(s)	Blank(s)	Blank(s)	T4d	N1
30-34 years	White	Female	2012	California excluding SF/SJM/LA - 2000+	Not applicable (1973-2004, 2005 not Louisiana, or 2006+)	59	CA: Orange County (06059)	Yes	Not CHSDA	Pacific Coast	California	Breast	Malignant	8.4 Carcinoma of breast	Unclassified	XI(f) Other and unspecified carcinomas	Breast	Breast	C50.4-Upper-outer quadrant of breast	504	8530	Malignant	Unknown	Left - origin of primary	Positive histology	8530/3: Inflammatory carcinoma	8530/3: Inflammatory carcinoma	8500-8549: ductal and lobular neoplasms	Not Brain	XI(f.6) Carcinomas of breast	Female Breast	IIIB	IIIB	IIIB	AJCC 6th ed derived from CS manual/coding instructions, v1.0	Blank(s)	Blank(s)	N/A	T4d	N2a	M0	T4d	N2a	M0	Blank(s)	Blank(s)	Blank(s)	T4d	N2
60-64 years	Other (American Indian/AK Native, Asian/Pacific Islander)	Female	2012	California excluding SF/SJM/LA - 2000+	Not applicable (1973-2004, 2005 not Louisiana, or 2006+)	73	CA: San Diego County (06073)	Yes	CHSDA	Pacific Coast	California	Breast	Malignant	8.4 Carcinoma of breast	Unclassified	XI(f) Other and unspecified carcinomas	Breast	Breast	C50.9-Breast, NOS	509	8530	Malignant	Poorly differentiated; Grade III	Right - origin of primary	Positive histology	8530/3: Inflammatory carcinoma	8530/3: Inflammatory carcinoma	8500-8549: ductal and lobular neoplasms	Not Brain	XI(f.6) Carcinomas of breast	Female Breast	IV	IV	IIIC	AJCC 6th ed derived from CS manual/coding instructions, v1.0	Blank(s)	Blank(s)	N/A	T4d	N1NOS	M1	T4d	N1NOS	M1	Blank(s)	Blank(s)	Blank(s)	T4d	N3
55-59 years	Black	Female	2012	California excluding SF/SJM/LA - 2000+	Not applicable (1973-2004, 2005 not Louisiana, or 2006+)	23	CA: Humboldt County (06023)	Yes	CHSDA	Pacific Coast	California	Breast	Malignant	8.4 Carcinoma of breast	Unclassified	XI(f) Other and unspecified carcinomas	Breast	Breast	C50.1-Central portion of breast	501	8530	Malignant	Moderately differentiated; Grade II	Right - origin of primary	Positive histology	8530/3: Inflammatory carcinoma	8530/3: Inflammatory carcinoma	8500-8549: ductal and lobular neoplasms	Not Brain	XI(f.6) Carcinomas of breast	Female Breast	IIIC	IIIC	IIIC	AJCC 6th ed derived from CS manual/coding instructions, v1.0	Blank(s)	Blank(s)	N/A	T4d	N3NOS	M0	T4d	N3NOS	M0	Blank(s)	Blank(s)	Blank(s)	T4d	N3
50-54 years	White	Female	2012	California excluding SF/SJM/LA - 2000+	Not applicable (1973-2004, 2005 not Louisiana, or 2006+)	71	CA: San Bernardino County (06071)	Yes	CHSDA	Pacific Coast	California	Breast	Malignant	8.4 Carcinoma of breast	Unclassified	XI(f) Other and unspecified carcinomas	Breast	Breast	C50.8-Overlapping lesion of breast	508	8530	Malignant	Poorly differentiated; Grade III	Left - origin of primary	Positive histology	8530/3: Inflammatory carcinoma	8530/3: Inflammatory carcinoma	8500-8549: ductal and lobular neoplasms	Not Brain	XI(f.6) Carcinomas of breast	Female Breast	IIIB	IIIB	IIIB	AJCC 6th ed derived from CS manual/coding instructions, v1.0	Blank(s)	Blank(s)	N/A	T4d	N2NOS	M0	T4d	N2NOS	M0	Blank(s)	Blank(s)	Blank(s)	T4d	N2
60-64 years	White	Female	2012	California excluding SF/SJM/LA - 2000+	Not applicable (1973-2004, 2005 not Louisiana, or 2006+)	97	CA: Sonoma County (06097)	Yes	CHSDA	Pacific Coast	California	Breast	Malignant	8.4 Carcinoma of breast	Unclassified	XI(f) Other and unspecified carcinomas	Breast	Breast	C50.9-Breast, NOS	509	8530	Malignant	Moderately differentiated; Grade II	Right - origin of primary	Positive histology	8530/3: Inflammatory carcinoma	8530/3: Inflammatory carcinoma	8500-8549: ductal and lobular neoplasms	Not Brain	XI(f.6) Carcinomas of breast	Female Breast	IIIB	IIIB	IIIB	AJCC 6th ed derived from CS manual/coding instructions, v1.0	Blank(s)	Blank(s)	N/A	T4d	N1a	M0	T4d	N1a	M0	Blank(s)	Blank(s)	Blank(s)	T4d	N1
60-64 years	White	Female	2012	California excluding SF/SJM/LA - 2000+	Not applicable (1973-2004, 2005 not Louisiana, or 2006+)	59	CA: Orange County (06059)	Yes	Not CHSDA	Pacific Coast	California	Breast	Malignant	8.4 Carcinoma of breast	Unclassified	XI(f) Other and unspecified carcinomas	Breast	Breast	C50.6-Axillary tail of breast	506	8530	Malignant	Unknown	Right - origin of primary	Positive histology	8530/3: Inflammatory carcinoma	8530/3: Inflammatory carcinoma	8500-8549: ductal and lobular neoplasms	Not Brain	XI(f.6) Carcinomas of breast	Female Breast	IIIB	IIIB	IIIB	AJCC 6th ed derived from CS manual/coding instructions, v1.0	Blank(s)	Blank(s)	N/A	T4d	N2NOS	M0	T4d	N2NOS	M0	Blank(s)	Blank(s)	Blank(s)	T4d	N2
45-49 years	White	Female	2012	California excluding SF/SJM/LA - 2000+	Not applicable (1973-2004, 2005 not Louisiana, or 2006+)	33	CA: Lake County (06033)	Yes	CHSDA	Pacific Coast	California	Breast	Malignant	8.4 Carcinoma of breast	Unclassified	XI(f) Other and unspecified carcinomas	Breast	Breast	C50.9-Breast, NOS	509	8530	Malignant	Poorly differentiated; Grade III	Left - origin of primary	Positive histology	8530/3: Inflammatory carcinoma	8530/3: Inflammatory carcinoma	8500-8549: ductal and lobular neoplasms	Not Brain	XI(f.6) Carcinomas of breast	Female Breast	IV	IV	IV	AJCC 6th ed derived from CS manual/coding instructions, v1.0	Blank(s)	Blank(s)	N/A	T4d	N0(i-)	M1	T4d	N0(i-)	M1	Blank(s)	Blank(s)	Blank(s)	Any T, Mets	N0
45-49 years	White	Female	2012	California excluding SF/SJM/LA - 2000+	Not applicable (1973-2004, 2005 not Louisiana, or 2006+)	55	CA: Napa County (06055)	Yes	Not CHSDA	Pacific Coast	California	Breast	Malignant	8.4 Carcinoma of breast	Unclassified	XI(f) Other and unspecified carcinomas	Breast	Breast	C50.9-Breast, NOS	509	8530	Malignant	Poorly differentiated; Grade III	Left - origin of primary	Positive histology	8530/3: Inflammatory carcinoma	8530/3: Inflammatory carcinoma	8500-8549: ductal and lobular neoplasms	Not Brain	XI(f.6) Carcinomas of breast	Female Breast	IIIC	IIIC	IIIC	AJCC 6th ed derived from CS manual/coding instructions, v1.0	Blank(s)	Blank(s)	N/A	T4d	N3a	M0	T4d	N3a	M0	Blank(s)	Blank(s)	Blank(s)	T4d	N3
30-34 years	White	Female	2012	California excluding SF/SJM/LA - 2000+	Not applicable (1973-2004, 2005 not Louisiana, or 2006+)	65	CA: Riverside County (06065)	Yes	CHSDA	Pacific Coast	California	Breast	Malignant	8.4 Carcinoma of breast	Unclassified	XI(f) Other and unspecified carcinomas	Breast	Breast	C50.8-Overlapping lesion of breast	508	8530	Malignant	Poorly differentiated; Grade III	Right - origin of primary	Positive histology	8530/3: Inflammatory carcinoma	8530/3: Inflammatory carcinoma	8500-8549: ductal and lobular neoplasms	Not Brain	XI(f.6) Carcinomas of breast	Female Breast	IIIC	IIIC	IIIC	AJCC 6th ed derived from CS manual/coding instructions, v1.0	Blank(s)	Blank(s)	N/A	T4d	N3a	M0	T4d	N3a	M0	Blank(s)	Blank(s)	Blank(s)	T4d	N3
35-39 years	White	Female	2012	California excluding SF/SJM/LA - 2000+	Not applicable (1973-2004, 2005 not Louisiana, or 2006+)	73	CA: San Diego County (06073)	Yes	CHSDA	Pacific Coast	California	Breast	Malignant	8.4 Carcinoma of breast	Unclassified	XI(f) Other and unspecified carcinomas	Breast	Breast	C50.9-Breast, NOS	509	8530	Malignant	Moderately differentiated; Grade II	Right - origin of primary	Positive histology	8530/3: Inflammatory carcinoma	8530/3: Inflammatory carcinoma	8500-8549: ductal and lobular neoplasms	Not Brain	XI(f.6) Carcinomas of breast	Female Breast	IIIB	IIIB	IIIB	AJCC 6th ed derived from CS manual/coding instructions, v1.0	Blank(s)	Blank(s)	N/A	T4d	N1	M0	T4d	N1	M0	Blank(s)	Blank(s)	Blank(s)	T4d	N1
75-79 years	White	Female	2012	California excluding SF/SJM/LA - 2000+	Not applicable (1973-2004, 2005 not Louisiana, or 2006+)	59	CA: Orange County (06059)	Yes	Not CHSDA	Pacific Coast	California	Breast	Malignant	8.4 Carcinoma of breast	Unclassified	XI(f) Other and unspecified carcinomas	Breast	Breast	C50.9-Breast, NOS	509	8530	Malignant	Moderately differentiated; Grade II	Left - origin of primary	Positive histology	8530/3: Inflammatory carcinoma	8530/3: Inflammatory carcinoma	8500-8549: ductal and lobular neoplasms	Not Brain	XI(f.6) Carcinomas of breast	Female Breast	IV	IV	IV	AJCC 6th ed derived from CS manual/coding instructions, v1.0	Blank(s)	Blank(s)	N/A	T4d	N1	M1	T4d	N1	M1	Blank(s)	Blank(s)	Blank(s)	Any T, Mets	N1
50-54 years	White	Female	2012	California excluding SF/SJM/LA - 2000+	Not applicable (1973-2004, 2005 not Louisiana, or 2006+)	111	CA: Ventura County (06111)	Yes	Not CHSDA	Pacific Coast	California	Breast	Malignant	8.4 Carcinoma of breast	Unclassified	XI(f) Other and unspecified carcinomas	Breast	Breast	C50.9-Breast, NOS	509	8530	Malignant	Well differentiated; Grade I	Left - origin of primary	Positive histology	8530/3: Inflammatory carcinoma	8530/3: Inflammatory carcinoma	8500-8549: ductal and lobular neoplasms	Not Brain	XI(f.6) Carcinomas of breast	Female Breast	IIIB	IIIB	IIIB	AJCC 6th ed derived from CS manual/coding instructions, v1.0	Blank(s)	Blank(s)	N/A	T4d	N0	M0	T4d	N0	M0	Blank(s)	Blank(s)	Blank(s)	T4d	N0
50-54 years	White	Female	2012	California excluding SF/SJM/LA - 2000+	Not applicable (1973-2004, 2005 not Louisiana, or 2006+)	73	CA: San Diego County (06073)	Yes	CHSDA	Pacific Coast	California	Breast	Malignant	8.4 Carcinoma of breast	Unclassified	XI(f) Other and unspecified carcinomas	Breast	Breast	C50.9-Breast, NOS	509	8530	Malignant	Poorly differentiated; Grade III	Left - origin of primary	Positive histology	8530/3: Inflammatory carcinoma	8530/3: Inflammatory carcinoma	8500-8549: ductal and lobular neoplasms	Not Brain	XI(f.6) Carcinomas of breast	Female Breast	IIIB	IIIB	IIIB	AJCC 6th ed derived from CS manual/coding instructions, v1.0	Blank(s)	Blank(s)	N/A	T4d	N1	M0	T4d	N1	M0	Blank(s)	Blank(s)	Blank(s)	T4d	N1
35-39 years	Other (American Indian/AK Native, Asian/Pacific Islander)	Female	2012	California excluding SF/SJM/LA - 2000+	Not applicable (1973-2004, 2005 not Louisiana, or 2006+)	73	CA: San Diego County (06073)	Yes	CHSDA	Pacific Coast	California	Breast	Malignant	8.4 Carcinoma of breast	Unclassified	XI(f) Other and unspecified carcinomas	Breast	Breast	C50.4-Upper-outer quadrant of breast	504	8530	Malignant	Poorly differentiated; Grade III	Right - origin of primary	Positive histology	8530/3: Inflammatory carcinoma	8530/3: Inflammatory carcinoma	8500-8549: ductal and lobular neoplasms	Not Brain	XI(f.6) Carcinomas of breast	Female Breast	IIIB	IIIB	IIIB	AJCC 6th ed derived from CS manual/coding instructions, v1.0	Blank(s)	Blank(s)	N/A	T4d	N2a	M0	T4d	N2a	M0	Blank(s)	Blank(s)	Blank(s)	T4d	N2
60-64 years	White	Female	2012	California excluding SF/SJM/LA - 2000+	Not applicable (1973-2004, 2005 not Louisiana, or 2006+)	73	CA: San Diego County (06073)	Yes	CHSDA	Pacific Coast	California	Breast	Malignant	8.4 Carcinoma of breast	Unclassified	XI(f) Other and unspecified carcinomas	Breast	Breast	C50.1-Central portion of breast	501	8530	Malignant	Poorly differentiated; Grade III	Right - origin of primary	Positive histology	8530/3: Inflammatory carcinoma	8530/3: Inflammatory carcinoma	8500-8549: ductal and lobular neoplasms	Not Brain	XI(f.6) Carcinomas of breast	Female Breast	IIIB	IIIB	IIIB	AJCC 6th ed derived from CS manual/coding instructions, v1.0	Blank(s)	Blank(s)	N/A	T4d	N1a	M0	T4d	N1a	M0	Blank(s)	Blank(s)	Blank(s)	T4d	N1
[truncated: 423 more rows]
[truncated: 150 more columns]
